# Supplementary material for: Cell Specific eQTL Analysis without Sorting Cells
Source: PLoS Genet. 2015 May 8;11(5):e1005223. doi: 10.1371/journal.pgen.1005223 (PMC4425538; doi:10.1371/journal.pgen.1005223)
Supplement: S6 Table — We then meta-analyzed the interaction terms for these two cohorts and observed that several axes mediate eQTL effects. The Z-scores for the interaction effects for axis 5 correlate strongly with the Z-scores for interaction effects for the neutrophil proxy (R = 0.74). (XLSX) [file pgen.1005223.s016.xlsx]

## Sheet: merged.txt
Supplementary Table 6
Z-scores are determined using a sample weighted Z-score meta-analysis on the EGCUT and Fehrmann cohorts.
Covariate	Number of significant interactions (p<0.05/13037)	Correlation with Neutrophil proxy Z-score
Neutrophil Proxy	101
Axis-1	88	-0.127908
Axis-2	67	0.128647
Axis-3	51	-0.107082
Axis-4	136	0.262936
Axis-5	107	0.719662
Axis-6	167	-0.00800311
Axis-7	55	0.486457
Axis-8	158	0.0393363
Axis-9	231	0.513362
SNP	Illumina HT12v3 Probe Array Address	Gene	Z-Score Neutrophil Proxy	P-value Neutrophil Proxy	Z-Score Axis-1	P-value Axis-1	Z-Score Axis-2	P-value Axis-2	Z-Score Axis-3	P-value Axis-3	Z-Score Axis-4	P-value Axis-4	Z-Score Axis-5	P-value Axis-5	Z-Score Axis-6	P-value Axis-6	Z-Score Axis-7	P-value Axis-7	Z-Score Axis-8	P-value Axis-8	Z-Score Axis-9	P-value Axis-9
rs1325195	7650414	FAM20B	1.85871	0.0630689	2.50838	0.0121286	-1.48553	0.137402	0.809995	0.417943	2.37132	0.0177248	2.05177	0.0401917	-0.776743	0.437311	0.670511	0.502532	1.06078	0.288791	1.49567	0.13474
rs10423674	3780131	AC005253.4;KXD1	0.599164	0.549064	0.612126	0.540455	0.277811	0.781157	1.97794	0.0479356	-0.623783	0.53277	0.82786	0.40775	0.374997	0.707663	1.31761	0.187636	-0.352324	0.724595	0.224129	0.822657
rs3213566	2750612	SPPL3	-1.37084	0.170425	-0.621693	0.534144	-0.298544	0.765288	1.04626	0.29544	-1.25136	0.210802	-1.4829	0.1381	1.09556	0.273272	1.18264	0.236952	-0.734346	0.462738	-0.111165	0.911485
rs2653605	1430358	AKIP1	0.674944	0.499711	0.495634	0.620153	-0.848707	0.396044	-0.139828	0.888796	1.20845	0.226874	0.71128	0.476911	1.83319	0.066775	1.41941	0.155778	1.46809	0.142081	1.30667	0.191324
rs12518386	2680100	TNIP1	0.626296	0.531121	-0.0420057	0.966494	-1.76227	0.0780236	1.09381	0.274038	1.2442	0.213427	1.15871	0.246574	1.93666	0.0527865	1.04515	0.295956	1.22442	0.220792	1.16553	0.243805
rs3776019	2570767	CDC42SE2	-0.718064	0.472718	-1.62747	0.103637	-0.892423	0.372166	-0.933285	0.350673	0.771806	0.44023	0.244531	0.80682	3.40391	0.00066428	1.68259	0.0924536	3.39213	0.000693515	2.20312	0.0275865
rs11243081	2230241	F13A1	-1.25154	0.210737	0.191475	0.848153	-0.400033	0.689132	-0.362579	0.71692	0.267997	0.788701	-1.15324	0.24881	0.760309	0.44707	0.155757	0.876225	0.823306	0.410334	-0.614608	0.538814
rs13133397	2450554	RBPJ	1.56515	0.117547	-0.827644	0.407872	1.00999	0.312502	-0.611512	0.54086	0.102566	0.918308	0.873058	0.382631	2.68119	0.00733611	1.69183	0.0906786	2.95818	0.00309465	3.11476	0.00184096
rs881375	4570768	TRAF1	-2.99827	0.00271518	1.64763	0.0994293	-0.881454	0.378072	1.45524	0.145604	0.20015	0.841363	-1.7981	0.0721606	0.822031	0.411059	-0.341917	0.732413	1.89243	0.0584343	-0.905536	0.365181
rs9993439	610020	CHRNA9	0.658155	0.510439	-1.22041	0.222308	0.085324	0.932004	-0.600951	0.547873	-0.363336	0.716354	-0.343749	0.731035	0.27073	0.786599	1.56664	0.117199	-0.827516	0.407944	0.0619155	0.95063
rs4919054	4890128	-	0.502828	0.615086	1.00302	0.315853	-0.117671	0.906329	0.652398	0.514144	0.9195	0.357834	1.30789	0.19091	-0.376912	0.706239	-0.078726	0.937251	0.240023	0.810312	-0.0755492	0.939778
rs1048761	2650324	-	0.743597	0.45712	-2.1239	0.0336782	1.13624	0.255857	-0.218633	0.826936	-0.211127	0.832788	-0.275326	0.783066	2.37352	0.0176196	0.380482	0.703588	2.26692	0.0233949	1.53781	0.124094
rs10490924	3930541	PLEKHA1	-0.78818	0.430592	-0.0657949	0.947541	-1.12012	0.262661	-0.759626	0.447478	0.486511	0.626605	0.0736156	0.941316	-0.103538	0.917536	0.154333	0.877347	1.51257	0.130389	-0.11317	0.909896
rs2637125	2230278	CABP5	0.880058	0.378828	1.56574	0.117409	-0.331546	0.740232	1.40289	0.16065	0.59235	0.553616	1.40011	0.16148	-1.09187	0.274891	0.207575	0.835561	-0.376223	0.706751	1.5361	0.124513
rs2272722	2370129	RP11-557C18.3;DERL1	-0.99433	0.320062	0.733769	0.46309	-0.5647	0.572278	-0.444304	0.656823	0.0527368	0.957942	-0.550147	0.582219	2.22776	0.0258964	0.737259	0.460965	1.63613	0.101811	1.13366	0.256937
rs6017510	6420039	-	0.0661919	0.947225	-0.542538	0.587448	-0.409489	0.682181	0.161446	0.871742	0.302188	0.762509	-0.516505	0.605502	-0.618252	0.536409	-0.029771	0.97625	0.352171	0.72471	0.731856	0.464257
rs11658329	4220180	DCAF7	-0.75473	0.450411	0.0512153	0.959154	1.14752	0.251167	1.80824	0.0705692	0.189252	0.849895	0.402612	0.687234	0.0456651	0.963577	-0.322399	0.74715	0.344884	0.730182	-0.0561037	0.955259
rs2839619	1230047	CBS	-0.544491	0.586104	1.25664	0.208885	-1.61628	0.106034	1.87504	0.060787	4.01699	5.89471e-05	5.19211	2.0792e-07	2.61616	0.00889253	1.12653	0.259942	3.4543	0.000551724	3.21015	0.00132666
rs1023252	6270739	NPPA-AS1;NPPA	0.21702	0.828193	1.41969	0.155698	-2.08249	0.0372982	0.969418	0.332337	1.22784	0.219505	1.07959	0.280326	-0.887877	0.374607	1.56321	0.118004	0.15042	0.880434	-0.649006	0.516334
rs831504	7210717	FGD2	2.63785	0.00834344	-1.05748	0.290294	0.424725	0.671037	-1.86246	0.0625381	0.337001	0.736116	-1.49251	0.135565	4.49142	7.07513e-06	-2.2848	0.0223246	5.46525	4.6226e-08	-0.0108896	0.991312
rs11666579	290309	FAM125A	-0.127183	0.898796	0.396753	0.69155	-1.06088	0.288746	-0.385936	0.699544	-0.525876	0.598975	-0.596907	0.550569	-1.51077	0.130848	-0.086185	0.931319	-1.35265	0.176168	-2.07216	0.0382507
rs9400317	5270670	RP5-919F19.5;AKD1	0.867391	0.385728	3.55997	0.000370902	-3.0387	0.00237605	1.73775	0.0822557	3.42679	0.000610766	1.78551	0.0741782	-0.518268	0.604271	2.17464	0.0296574	1.49979	0.133668	2.11641	0.0343097
rs17623400	510291	DECR1	1.93643	0.0528156	-0.170011	0.865001	0.685736	0.492879	-0.28079	0.778871	-0.164107	0.869647	0.983448	0.325387	0.200999	0.8407	1.56793	0.116898	-0.0997056	0.920578	1.34259	0.179406
rs10870165	60706	SDCCAG3	0.948444	0.342903	-0.305875	0.7597	0.103283	0.917739	0.0357154	0.971509	-0.823475	0.410238	0.523065	0.600929	-0.114891	0.908531	1.91172	0.0559126	-0.778414	0.436325	-0.0646692	0.948437
rs37062	3180576	CNOT1	-1.79568	0.072545	-0.0720327	0.942576	-0.0220234	0.982429	0.826062	0.408769	-0.900144	0.368044	-0.914333	0.360542	0.504109	0.614184	-1.64196	0.100598	1.27285	0.20307	0.0320678	0.974418
rs6046396	6590445	RIN2	0.722552	0.469955	0.0392833	0.968664	-0.595662	0.551401	-0.514534	0.606878	1.43676	0.150786	1.74791	0.080479	1.49253	0.135561	0.686991	0.492089	1.28836	0.197619	0.43454	0.663896
rs6069592	4200746	BPI	2.61098	0.00902823	-2.07878	0.037638	2.51678	0.0118434	-1.86555	0.062104	-0.748133	0.45438	1.46873	0.141906	-0.46696	0.640528	3.98016	6.88685e-05	-1.70815	0.0876079	1.18493	0.236046
rs9812709	1450427	RTP4	-1.02395	0.30586	1.16941	0.242238	1.22757	0.21961	0.847414	0.396764	-0.230691	0.817555	-1.84316	0.0653062	0.656465	0.511525	0.690604	0.489815	0.242636	0.808288	-0.395021	0.692828
rs807214	5570279	HIST1H1C	0.579522	0.562237	-0.0312551	0.975066	0.449359	0.653173	-0.564536	0.572389	-0.28256	0.777514	0.266305	0.790004	0.693459	0.488021	0.364136	0.715756	0.274983	0.783329	2.02304	0.043069
rs7743761	1940047	AIF1	0.663678	0.506896	-0.044988	0.964117	-0.275334	0.783059	0.010358	0.991736	0.231509	0.81692	0.229906	0.818165	0.671864	0.50167	0.605503	0.544845	0.509544	0.610371	0.741126	0.458617
rs10838681	5810398	SPI1	0.83626	0.403009	0.292916	0.769586	0.647905	0.517046	0.260084	0.794799	0.7466	0.455305	0.86676	0.386074	0.56281	0.573565	1.16954	0.242188	1.38773	0.16522	0.906775	0.364526
rs46522	5820646	CALCOCO2	-0.926485	0.354194	0.831015	0.405965	-1.93351	0.0531739	-0.473362	0.635955	0.408454	0.68294	1.51013	0.131011	0.835332	0.403531	-0.0148116	0.988182	1.64899	0.0991503	-0.462093	0.644014
rs428445	4180673	RTFDC1;GCNT7;FAM209A	-0.0840467	0.933019	-1.92003	0.0548535	0.537985	0.590587	0.988143	0.323083	-0.1648	0.869101	0.0664207	0.947043	1.01956	0.30794	-0.962172	0.335963	0.597828	0.549955	-0.199799	0.841638
rs7209235	1440296	H3F3B	1.34969	0.177116	-0.094093	0.925035	0.986698	0.323791	-0.612127	0.540453	0.352082	0.724776	0.23911	0.811021	-0.963549	0.335272	0.732312	0.463978	-1.15053	0.249925	0.622148	0.533845
rs7558608	3360093	AC018462.2;COMMD1	0.766172	0.443574	-0.766865	0.443162	0.929666	0.352544	-0.390461	0.696196	-0.507737	0.611638	0.568659	0.569588	2.14499	0.0319534	-0.183407	0.854479	1.1997	0.230255	0.710459	0.477419
rs9865634	5870221	GOLIM4	1.87638	0.0606026	3.57466	0.000350689	-1.87816	0.0603592	2.08116	0.0374195	5.11283	3.17375e-07	3.59269	0.000327277	-2.33895	0.0193381	1.35848	0.174312	0.824045	0.409914	2.44831	0.0143526
rs2184161	1990097	GTPBP5	-1.47809	0.139385	-0.452063	0.651224	0.837514	0.402304	0.229001	0.818868	-0.847385	0.396781	-1.5323	0.125448	1.14918	0.250481	-1.459	0.144566	1.0635	0.287556	1.49203	0.135691
rs2242601	7320594	ZYX;EPHA1	1.22747	0.219648	0.169274	0.865581	0.101698	0.918997	1.50135	0.133266	1.88245	0.0597753	1.78625	0.0740593	0.908162	0.363792	0.887619	0.374746	0.510429	0.609751	1.88896	0.0588974
rs8078723	60360	PSMD3	-0.608132	0.5431	0.360093	0.718778	-0.45859	0.646529	0.391902	0.69513	-1.3334	0.1824	-0.618587	0.536189	-0.0563135	0.955092	1.16825	0.242705	-1.03978	0.29844	-0.665797	0.505541
rs4143832	6040398	AC034220.3;SLC22A4	0.460498	0.645159	0.294224	0.768587	0.0415821	0.966832	0.269655	0.787426	-0.227706	0.819875	-0.498327	0.618254	-1.67344	0.0942405	-0.207605	0.835537	-0.668409	0.503873	-1.22284	0.221391
rs12166475	5260685	CHEK2	-1.32591	0.184868	2.02472	0.0428957	-1.01298	0.311071	1.43735	0.150617	1.52798	0.126517	-0.0224566	0.982084	-1.82078	0.0686398	0.114415	0.908909	-0.34789	0.727923	-0.961434	0.336334
rs12032643	6330646	ZNF672	-0.399198	0.689747	-1.44161	0.149411	1.91608	0.0553547	-0.0759873	0.939429	-0.770049	0.441271	-0.729157	0.465905	1.43952	0.150004	-0.896669	0.369896	0.286703	0.77434	0.416436	0.677091
rs9994372	520634	ATP8A1	0.889027	0.373989	-0.961087	0.336509	0.782396	0.433982	0.707546	0.479227	-1.43336	0.151754	-0.364982	0.715125	-0.198409	0.842725	-0.551168	0.581518	-1.42501	0.154156	-0.121418	0.90336
rs7124676	3610743	SF1	-0.0550448	0.956103	1.03867	0.298957	-1.22623	0.220114	0.0334958	0.973279	-1.01238	0.311357	-0.210156	0.833546	-2.31485	0.0206213	-1.11276	0.265814	-1.95769	0.0502658	-3.13595	0.00171296
rs12718597	4390086	IKZF1	-0.490354	0.623883	0.52345	0.600661	-0.225767	0.821383	0.436251	0.662654	-0.513499	0.607602	-0.531071	0.59537	-0.686865	0.492168	-0.270002	0.787159	-0.912769	0.361364	-1.67746	0.0934518
rs1061925	1580427	ACOT13	-0.66049	0.508939	0.141356	0.887589	-1.24607	0.21274	0.502738	0.615149	0.799947	0.423741	-0.504266	0.614075	1.78451	0.0743406	0.957537	0.338296	1.48392	0.13783	1.34396	0.178962
rs3815087	7150630	HLA-C	1.15095	0.249754	-0.984562	0.324839	0.332962	0.739163	-0.778981	0.435991	0.520076	0.60301	0.815166	0.414978	3.15629	0.00159788	2.5471	0.0108622	3.38497	0.000711864	3.64093	0.000271656
rs13118159	2340671	MAEA	1.01335	0.310892	0.375326	0.707418	-1.08	0.280143	0.380846	0.703317	0.867652	0.385585	2.30445	0.0211975	0.371076	0.710581	1.0895	0.275934	0.476876	0.63345	-0.586132	0.557787
rs7310409	6280543	OASL	-0.0611684	0.951225	0.0270579	0.978414	-0.369102	0.712052	-1.31241	0.189381	-0.409904	0.681876	-0.662939	0.50737	-0.205828	0.836925	2.36919	0.0178272	-0.145409	0.884388	0.00907535	0.992759
rs2070729	6250064	IRF1	-1.02556	0.305099	1.01032	0.312343	-1.73101	0.0834502	1.84612	0.0648749	-0.200293	0.841252	-1.47107	0.141273	-0.0331746	0.973535	-2.35697	0.0184246	-0.281109	0.778627	-2.07483	0.0380019
rs3803915	4210612	AP3D1	1.94699	0.0515358	0.0862133	0.931297	-1.01412	0.310524	0.922096	0.356479	0.225136	0.821873	0.463935	0.642694	-2.17818	0.0293927	1.59727	0.110205	-1.91678	0.0552658	-0.162396	0.870994
rs12150660	2140040	TNFSF12;TNFSF12-TNFSF13;TNFSF13	-0.910071	0.362785	0.380621	0.703484	0.575134	0.5652	0.898129	0.369117	-0.364144	0.71575	-0.444815	0.656454	0.586417	0.557595	-0.147175	0.882994	0.335137	0.737522	0.559437	0.575863
rs2140148	4890722	-	2.00705	0.0447444	2.27575	0.022861	-0.46763	0.640049	1.60845	0.107738	1.21755	0.223395	2.08407	0.0371534	-0.784974	0.432469	0.578547	0.562895	-0.0767853	0.938794	1.94033	0.0523393
rs2236313	2850100	RP11-514O12.4;RNASET2	4.59325	4.36402e-06	-0.567514	0.570365	3.11329	0.00185016	-0.543469	0.586807	3.02389	0.00249548	4.4773	7.55921e-06	2.58318	0.0097895	1.51989	0.128539	2.71797	0.00656847	6.73657	1.62175e-11
rs10097731	1240228	PAG1	2.84708	0.00441219	0.282611	0.777475	-1.52806	0.126497	0.364277	0.715651	1.4391	0.150122	1.97783	0.0479481	0.969289	0.332401	1.60393	0.10873	1.79785	0.0722003	2.69979	0.00693835
rs174546	630445	RP11-467L20.9;C11orf10	-2.04677	0.0406804	0.382324	0.702221	-0.483906	0.628453	1.00286	0.315926	0.742684	0.457673	-0.881493	0.378051	0.992492	0.320958	0.842812	0.399333	0.815112	0.415008	0.745046	0.456244
rs7102	3180672	LITAF	-0.342061	0.732305	-0.942865	0.34575	0.725479	0.468158	-0.53503	0.592629	-1.27502	0.202301	-1.22585	0.220255	0.660644	0.50884	-1.41392	0.157385	-0.213966	0.830574	-0.0517085	0.958761
rs2444240	4200025	OAF	0.448991	0.653438	-0.937534	0.348484	0.301517	0.76302	-0.741656	0.458296	-0.830865	0.40605	0.0666334	0.946874	0.959375	0.33737	1.65705	0.0975091	-0.65822	0.510397	-0.118917	0.905341
rs7222840	2760138	GNGT2	0.899528	0.368371	1.43048	0.152579	-1.87829	0.060342	2.03579	0.0417713	0.988618	0.32285	-0.37188	0.709983	-0.760964	0.446678	1.8555	0.0635248	0.232176	0.816401	2.42711	0.0152196
rs7633407	1470520	CMTM7;CMTM6	0.32301	0.746688	1.33822	0.180826	0.138595	0.88977	1.82456	0.0680678	0.514888	0.606631	0.527225	0.598037	-3.03739	0.00238636	0.76124	0.446514	-0.937863	0.348315	-0.516147	0.605752
rs9943753	2140291	MMAB	-0.897722	0.369334	0.646988	0.51764	0.272074	0.785565	0.862691	0.388307	-0.943287	0.345534	-1.19551	0.231889	0.379725	0.70415	-1.07278	0.283372	-0.573962	0.565994	-1.86868	0.0616672
rs2444302	2630369	CHST14	-1.0859	0.277523	-0.12909	0.897286	0.393854	0.693689	0.316682	0.751485	2.44754	0.0143834	2.01257	0.0441596	1.65378	0.0981732	0.876772	0.380611	3.34922	0.000810384	1.96127	0.0498479
rs1799945	7210333	-	1.41894	0.155917	-0.212909	0.831398	1.05765	0.290216	-0.579775	0.562066	1.89603	0.0579563	1.92596	0.0541099	2.24262	0.0249214	1.45107	0.146759	2.96328	0.00304375	3.13445	0.00172174
rs2523815	1660452	-	-0.574336	0.565741	-0.754329	0.450652	-0.0218627	0.982558	-0.404798	0.685626	-1.49031	0.136141	-2.13965	0.032383	0.188375	0.850583	-1.02202	0.306774	-1.00427	0.31525	-2.70784	0.00677233
rs10418480	240008	CTC-444N24.8	-0.176655	0.859779	2.68194	0.00731956	-3.25572	0.00113105	1.86739	0.0618471	2.86859	0.0041231	1.8133	0.0697861	0.982673	0.325768	0.392777	0.694484	3.00234	0.0026791	1.20084	0.229815
rs8249	2230541	CCT6B;ZNF830	0.713875	0.475305	2.15973	0.0307937	-1.10444	0.269402	0.675054	0.499641	2.51409	0.0119339	1.71642	0.0860858	-0.419771	0.674653	1.83143	0.067036	1.49617	0.134609	2.39968	0.0164094
rs7550536	60437	PLOD1	1.9911	0.0464701	-0.0262974	0.97902	0.179648	0.857429	-1.02468	0.305514	1.65889	0.0971386	1.08759	0.276776	3.88957	0.000100421	1.18002	0.237992	4.066	4.7828e-05	4.37699	1.20327e-05
rs3764563	6560239	CYP4F12	0.057986	0.95376	-0.0704757	0.943815	0.436829	0.662235	-0.789735	0.429682	-0.217806	0.827581	0.0868745	0.930771	-1.18822	0.234747	0.516438	0.605548	-0.697915	0.48523	-0.131387	0.895469
rs7897654	1010253	NT5C2	-0.304349	0.760862	0.340361	0.733585	0.459079	0.646178	1.89674	0.057862	-1.20274	0.229078	-1.77869	0.0752905	1.11837	0.263407	-1.74252	0.0814169	-0.458793	0.646383	-0.0734848	0.94142
rs2839527	2140463	SLC37A1	1.6176	0.105748	-0.159085	0.873602	-0.266794	0.789628	0.179679	0.857404	1.8344	0.066594	1.6136	0.106615	-1.7372	0.0823526	2.7904	0.00526426	-0.607282	0.543664	0.478536	0.632268
rs10461245	2650605	FAM198B	1.25953	0.207839	3.4124	0.000643925	-1.57126	0.116123	1.44189	0.149332	5.37768	7.54503e-08	3.35223	0.000801621	-1.8782	0.0603544	3.83223	0.000126988	1.82253	0.0683748	3.19722	0.00138758
rs12128071	1570747	LINGO4	0.80912	0.418446	1.20219	0.229291	-2.13582	0.032694	-0.138998	0.889452	0.60773	0.543366	-0.0347724	0.972261	-0.474551	0.635107	0.823128	0.410435	0.142021	0.887063	1.20601	0.227813
rs41997	770593	NAA38	-0.924561	0.355194	4.72516	2.29935e-06	-2.996	0.00273545	3.17088	0.00151978	3.3907	0.000697135	1.15603	0.247669	-3.03485	0.00240657	-0.247718	0.804353	0.158263	0.87425	-1.02408	0.305799
rs787980	2680170	HSPD1;HSPE1	0.0305321	0.975643	-0.0440204	0.964888	-0.17066	0.864491	-0.181004	0.856365	0.822001	0.411076	0.0230125	0.98164	-0.100666	0.919816	-0.437546	0.661716	0.734354	0.462733	1.11331	0.265574
rs7498665	6370097	TUFM	1.1157	0.264551	1.12686	0.259802	0.0608951	0.951443	0.926074	0.354407	3.28277	0.00102792	1.59714	0.110234	1.95799	0.0502309	0.696273	0.486258	3.36558	0.000763838	3.77455	0.000160295
rs3793966	6650612	TOLLIP;AC136297.1	2.32578	0.0200301	-0.894163	0.371235	0.449285	0.653226	-0.0607407	0.951566	0.0652917	0.947942	1.64701	0.0995555	0.933796	0.350409	1.22316	0.221271	0.0467128	0.962742	1.91748	0.0551772
rs9607821	2640132	CCDC134	1.45354	0.146075	-0.59726	0.550334	0.34613	0.729245	-0.168018	0.866569	0.449307	0.653211	0.180939	0.856416	0.93926	0.347597	1.37434	0.169337	0.0687329	0.945202	0.92796	0.353428
rs737092	3420372	RBM38	-0.802876	0.422046	1.0066	0.314129	-0.000928791	0.999259	0.337405	0.735811	0.45829	0.646744	0.292189	0.770142	-1.32523	0.185094	0.74569	0.455855	-0.10557	0.915924	-0.437646	0.661643
rs3011225	3060398	PTPRF	-0.612919	0.53993	1.18853	0.234624	0.277661	0.781272	0.902162	0.366971	1.06448	0.287112	-0.533361	0.593784	-0.221173	0.824958	-0.592844	0.553285	0.405411	0.685176	-0.801402	0.422899
rs770189	4040162	CTC-467M3.1;MEF2C	1.02294	0.306335	1.74302	0.0813308	-1.18367	0.236542	0.861686	0.388861	2.27075	0.0231623	1.91665	0.0552822	-1.92122	0.054704	1.12346	0.261242	-0.439025	0.660643	0.548836	0.583118
rs4744689	6480612	PIP5K1B;FAM122A	0.25373	0.799704	-0.597113	0.550432	-0.205328	0.837316	-0.26122	0.793923	-0.174069	0.861811	-0.40631	0.684515	1.11874	0.263251	1.23147	0.218148	0.729895	0.465454	-0.768548	0.442162
rs6876228	2940438	PTGER4	0.889167	0.373914	0.786056	0.431835	0.343091	0.73153	0.116651	0.907136	0.257025	0.797159	1.29509	0.19529	1.27692	0.201631	1.38354	0.166498	0.986355	0.323959	1.63785	0.101454
rs8023845	110280	BMF	-0.633355	0.526502	1.11306	0.265684	0.492052	0.622683	0.923785	0.355598	-0.261609	0.793623	-0.730582	0.465034	-0.742671	0.457681	0.038596	0.969212	-0.2367	0.81289	0.145265	0.884502
rs6427386	1660465	FCRL5	0.615698	0.538094	2.27659	0.0228108	-2.40036	0.0163791	8.83726	9.80925e-19	0.407797	0.683423	0.579348	0.562354	-0.501511	0.616012	0.570916	0.568056	-2.08785	0.0368111	0.118701	0.905513
rs12139158	7040707	KIF1B	0.911704	0.361924	-2.06709	0.0387255	2.54539	0.0109157	-1.60044	0.109502	0.564379	0.572496	0.685473	0.493046	1.92074	0.0547647	0.472061	0.636883	2.40667	0.0160986	2.17757	0.0294379
rs2156552	2000593	RPL17-C18ORF32;RPL17;hsa-mir-1539	-1.58829	0.112221	0.211056	0.832843	0.264565	0.791345	1.17464	0.24014	-0.0344462	0.972521	-1.07988	0.280197	0.137726	0.890457	-0.231632	0.816824	-0.24479	0.806619	0.394664	0.693091
rs2473355	1070544	EFHD2	1.05416	0.291809	0.00463495	0.996302	-0.34669	0.728824	0.297981	0.765718	-0.524426	0.599983	0.602617	0.546764	-0.599337	0.548948	0.845357	0.397912	-0.245545	0.806034	-0.169326	0.86554
rs10483727	1450408	SIX1	0.387935	0.698064	0.31236	0.754767	1.06299	0.287788	0.224277	0.822542	-0.481171	0.630395	0.428097	0.668581	-0.0707432	0.943602	-0.634549	0.525723	-0.15577	0.876214	0.357581	0.720657
rs4231	1030427	CUTA	-0.78349	0.433339	0.0694925	0.944598	0.353303	0.723862	0.136216	0.891651	0.628176	0.529889	-0.617373	0.536989	-0.196618	0.844127	-1.01814	0.308612	-0.337822	0.735497	-0.596667	0.55073
rs2252996	3800463	-	-0.244253	0.807035	-1.12773	0.259433	-0.333177	0.739001	-1.73025	0.0835857	-2.04174	0.0411775	-0.635689	0.524979	0.549807	0.582451	-1.39154	0.164063	0.127921	0.898212	-0.815192	0.414963
rs174583	2360020	FADS2;FADS1	-0.885066	0.376121	1.79049	0.0733745	-1.91956	0.0549131	0.606081	0.544461	2.4572	0.0140023	0.635687	0.52498	1.15697	0.247286	0.58193	0.560614	1.96876	0.0489801	1.60806	0.107822
rs519113	2140746	PVRL2	4.58281	4.58771e-06	-1.93712	0.0527307	-0.00358498	0.99714	-0.504625	0.613822	0.891649	0.372581	3.91602	9.00214e-05	1.65148	0.0986415	1.61267	0.106817	1.45774	0.144911	5.33339	9.63972e-08
rs2186344	1980356	AP001434.2;KCNJ15	0.868503	0.385119	-0.124799	0.900682	-0.305335	0.760111	-0.370455	0.711044	0.238797	0.811263	0.578817	0.562713	1.66512	0.0958885	0.839908	0.40096	0.471115	0.637558	1.51443	0.129916
rs2652822	1010482	RP11-244F12.2;TPM1	1.72771	0.0840394	-0.0694586	0.944625	0.693034	0.488288	-0.511811	0.608784	0.107631	0.914289	-2.26183	0.0237076	-1.17599	0.2396	-1.12328	0.261319	-0.711765	0.47661	-2.049	0.0404623
rs6672856	4260187	CRTC2	-0.186304	0.852207	-0.642847	0.520323	0.971078	0.331509	-1.51075	0.130851	-0.023	0.98165	0.370835	0.710761	0.104363	0.916881	0.83065	0.406172	-0.25644	0.797611	0.693572	0.48795
rs2275716	4390022	RUFY2;HNRNPH3	-0.0549565	0.956173	2.40064	0.0163666	0.143195	0.886136	0.74093	0.458736	1.35656	0.17492	0.262783	0.792718	-1.61799	0.105664	0.312195	0.754893	-1.01518	0.31002	0.940173	0.347129
rs4719946	4290619	CREB5	0.197477	0.843455	-0.173093	0.862578	0.153029	0.878376	-0.360013	0.718837	2.07322	0.0381522	1.29567	0.195088	1.50808	0.131534	0.554692	0.579105	2.25742	0.0239821	2.0931	0.0363404
rs17390295	7330102	CSMD1	1.25763	0.208527	-1.63066	0.102961	0.260624	0.794382	-1.49293	0.135456	-0.364458	0.715516	1.34165	0.179708	1.27565	0.20208	0.872793	0.382776	0.213048	0.83129	1.63027	0.103043
rs3766606	610193	PARK7	0.24108	0.809493	0.865919	0.386535	-0.667602	0.504388	0.118656	0.905548	0.328274	0.742705	-0.203929	0.838409	-0.76374	0.445022	-1.37926	0.167814	0.329158	0.742036	0.971684	0.331208
rs7512898	6280209	CAMSAP2	1.55639	0.119615	0.280657	0.778973	-0.404698	0.6857	-1.71452	0.0864333	1.27715	0.20155	1.72955	0.0837116	1.036	0.300201	0.0699556	0.944229	1.62933	0.103243	0.375324	0.707419
rs10458576	6420435	ZNF643	0.460692	0.645019	0.0599424	0.952202	-2.05898	0.0394959	0.552497	0.580608	0.532606	0.594306	0.266396	0.789934	0.97483	0.329645	1.27121	0.203655	0.104632	0.916668	0.494702	0.62081
rs761746	1440278	PISD	1.81031	0.0702473	-1.25894	0.208051	0.524302	0.600069	-0.607937	0.543229	0.693303	0.488119	1.26402	0.206223	1.03567	0.300355	0.533871	0.593431	1.53028	0.125947	2.19268	0.0283303
rs4900109	2260414	SLC24A4	0.26881	0.788076	-0.110959	0.911649	-0.782442	0.433955	0.666549	0.50506	0.580137	0.561822	0.0917423	0.926903	1.00051	0.317062	-1.08483	0.277996	1.21636	0.223847	-0.258103	0.796327
rs17783630	2260414	SLC24A4	0.873361	0.382466	-1.27384	0.202719	0.171369	0.863934	-0.326335	0.744171	-1.73243	0.0831978	-0.342001	0.73235	0.790441	0.42927	-0.728497	0.46631	-1.45523	0.145607	1.35625	0.175021
rs4924	1400672	AMFR	2.41361	0.0157955	1.42867	0.1531	0.433901	0.664361	3.90867	9.28057e-05	2.0457	0.0407861	1.53379	0.125082	-2.54076	0.0110612	2.48746	0.012866	-2.92816	0.00340975	1.47809	0.139384
rs4605213	1820504	NME1;NME2	-0.505444	0.613247	0.836684	0.40277	-1.63327	0.102411	1.81576	0.0694078	1.37197	0.170074	-0.240374	0.810041	-0.855337	0.392364	-1.38086	0.167322	0.152216	0.879017	-1.20978	0.226364
rs9320497	4610091	MANEA	1.55823	0.119179	-2.04172	0.0411794	0.497827	0.618606	-2.90205	0.00370731	-1.73837	0.0821462	-3.38558	0.000710277	1.47694	0.139693	-1.55937	0.11891	-0.296418	0.766911	-0.723777	0.469203
rs8905	7050021	PRKAR1A	1.93746	0.0526896	3.66522	0.00024713	-2.00848	0.0445927	2.73625	0.0062144	6.87861	6.0439e-12	4.72002	2.35824e-06	2.83664	0.00455916	2.09974	0.0357516	7.46768	8.162e-14	5.46903	4.52507e-08
rs687289	4490687	RP11-326L24.7;RALGDS;GBGT1	-1.14009	0.254249	1.26453	0.206038	-1.01049	0.31226	1.64316	0.100351	-0.283181	0.777038	-0.910416	0.362603	-1.16312	0.244781	-0.636799	0.524256	-0.999618	0.317495	-1.06781	0.285604
rs7470	3360373	RP11-283G6.4;RP11-283G6.5;SSPN	-0.768791	0.442017	0.0781197	0.937733	0.372898	0.709225	0.648825	0.516451	-0.526607	0.598466	-0.142379	0.886781	1.1711	0.241558	0.921649	0.356712	0.370762	0.710815	0.8953	0.370626
rs870210	7040241	OAT	2.1826	0.0290653	0.157674	0.874714	-0.387329	0.698512	0.339515	0.734222	3.22912	0.0012417	3.22479	0.00126064	0.510013	0.610042	1.03802	0.299261	2.19659	0.0280495	2.42753	0.0152022
rs4790881	360463	SRR;TSR1	0.168499	0.866191	2.20169	0.0276875	0.327868	0.743012	0.985777	0.324242	2.07615	0.0378797	1.90747	0.0564601	-1.44869	0.147423	0.802668	0.422167	-0.48207	0.629756	1.17944	0.238223
rs9894429	940300	OXLD1	0.526201	0.598748	-0.678044	0.497744	0.272671	0.785106	0.216732	0.828417	1.18656	0.235402	0.332709	0.739354	2.0475	0.0406088	-1.4616	0.14385	1.99302	0.0462592	2.36388	0.0180847
rs10407836	6560239	CYP4F12	3.81107	0.000138365	0.156111	0.875946	-0.954016	0.340076	0.448019	0.65414	0.826106	0.408744	2.97167	0.00296185	-2.61807	0.00884284	2.72372	0.00645518	-2.24173	0.0249788	0.737884	0.460585
rs4285028	4490403	IQCB1	1.58865	0.11214	1.98889	0.0467136	-0.81251	0.416499	0.984348	0.324944	1.31783	0.18756	1.4591	0.144539	-0.733531	0.463234	-0.681538	0.495531	-0.130934	0.895828	0.909567	0.363051
rs7984952	1580601	USPL1	1.34409	0.17892	1.25738	0.208616	-0.469527	0.638693	2.38658	0.0170058	1.49193	0.135717	1.57659	0.114889	1.42418	0.154394	1.04821	0.294543	2.17622	0.0295384	2.09602	0.0360805
rs1821284	6020468	SPINT2;PPP1R14A	2.19188	0.028388	-2.03605	0.0417454	2.03568	0.0417829	-1.47771	0.139487	-0.661431	0.508336	1.66155	0.0966038	1.33958	0.180383	0.830693	0.406147	-0.0506413	0.959611	1.48542	0.137432
rs1034762	5960440	VDR	-0.345572	0.729664	-0.207601	0.83554	-1.64971	0.0990014	0.750557	0.452919	-0.135956	0.891856	-0.543661	0.586675	-0.488483	0.625207	-0.447238	0.654703	-0.535319	0.592429	-0.916123	0.359602
rs8102642	5270731	SAFB	0.390426	0.696221	0.880729	0.378464	-0.990901	0.321734	0.615728	0.538074	0.149741	0.880969	0.916465	0.359423	-0.14164	0.887364	1.44951	0.147196	-0.489698	0.624347	0.29756	0.766039
rs6687704	2750438	RP11-436K8.1	-0.101507	0.919148	-0.955489	0.339331	-0.630287	0.528507	-0.346853	0.728702	-0.828519	0.407377	-0.149117	0.881461	2.31809	0.0204445	-1.48865	0.136579	0.479631	0.63149	-0.348203	0.727688
rs11015312	1710753	ARL5B	0.766133	0.443597	0.6081	0.543121	-1.65007	0.0989287	-0.666751	0.504931	1.12817	0.25925	1.67574	0.093789	-0.141098	0.887793	0.941741	0.346325	0.61248	0.54022	0.263012	0.792541
rs9357155	3180026	PSMB8	-1.52709	0.126739	0.0750336	0.940188	1.69794	0.0895182	0.0720008	0.942601	-1.02658	0.304617	-1.22757	0.219607	1.51372	0.130098	-1.26374	0.206325	0.592699	0.553383	0.432718	0.665219
rs7812879	6330471	BLK	0.320825	0.748343	1.63727	0.101573	-2.30236	0.0213147	1.21182	0.225582	1.11836	0.263413	0.689095	0.490763	-0.0896358	0.928577	0.233845	0.815105	0.315995	0.752006	-0.322008	0.747446
rs805303	1940047	AIF1	0.241567	0.809116	-1.62706	0.103724	0.918067	0.358584	-1.09219	0.274751	-0.698067	0.485135	-0.457251	0.647491	0.708573	0.47859	0.856911	0.391494	0.0981463	0.921816	0.834774	0.403845
rs529866	1990300	RMI2;SOCS1	-0.829853	0.406622	1.09936	0.27161	-1.35142	0.17656	0.544621	0.586014	1.75004	0.0801115	-0.834567	0.403962	-0.240798	0.809712	-1.79675	0.0723751	0.423328	0.672056	-1.55847	0.119122
rs12432620	3930372	AL163636.6;RNASE4;ANG	-0.71678	0.47351	0.840761	0.400482	-1.17106	0.241575	1.65418	0.0980915	0.189821	0.849449	1.20978	0.226364	-1.54064	0.123404	-0.407203	0.683859	-0.303863	0.761232	-0.989816	0.322264
rs12602161	5900129	LUC7L3	-0.678413	0.49751	0.178039	0.858692	-0.416555	0.677004	-0.49632	0.619668	1.40607	0.159703	0.878381	0.379737	0.4752	0.634644	-0.401277	0.688216	1.69849	0.0894153	0.0496446	0.960406
rs2888893	3290379	C12orf23	-0.0887649	0.929269	0.301345	0.763151	-0.0109578	0.991257	-0.0996081	0.920655	0.0108115	0.991374	-0.534534	0.592972	-0.539155	0.58978	1.27953	0.200712	-0.179217	0.857767	-1.09148	0.275064
rs9272346	6370315	HLA-DRB5	0.972038	0.331032	0.309199	0.75717	0.536629	0.591524	1.69589	0.0899067	1.2759	0.201992	0.487082	0.6262	2.1068	0.035135	1.51674	0.129332	1.60418	0.108675	2.29611	0.0216695
rs11718060	5270681	MUSTN1;TMEM110-MUSTN1;TMEM110	0.829155	0.407017	-0.108874	0.913303	-0.375825	0.707047	-1.34621	0.178234	-0.71283	0.475951	-0.503204	0.614821	-0.427819	0.668783	1.72807	0.0839751	-1.73628	0.0825143	-0.628788	0.529488
rs10776733	5260008	FAM212B	0.772766	0.439661	-0.658577	0.510167	0.297918	0.765766	-2.63901	0.00831497	-0.665437	0.505771	0.628261	0.529833	-0.125305	0.900282	-0.638642	0.523056	-0.58493	0.558595	-0.454094	0.649761
rs12220777	1170398	TMEM254	0.785935	0.431905	-0.267425	0.789142	0.711825	0.476573	0.369594	0.711685	0.21244	0.831764	-0.246371	0.805395	0.558918	0.576218	-1.3611	0.173481	1.70818	0.0876036	0.766192	0.443562
rs6995402	1510731	KIAA1875	-0.879288	0.379245	-0.60856	0.542816	0.432498	0.665379	-0.718363	0.472534	-0.806928	0.419708	-0.880459	0.378611	-0.0373028	0.970244	0.180581	0.856697	-0.00264996	0.997886	-0.877474	0.380229
rs11751996	6020044	SMPDL3A	0.314928	0.752817	0.705432	0.480541	-1.65286	0.0983593	0.492005	0.622716	1.0024	0.316151	0.648136	0.516897	0.87341	0.38244	0.690443	0.489916	0.949115	0.342562	0.812731	0.416372
rs2070729	4850168	AC034220.3;SLC22A4	-0.337358	0.735847	0.432238	0.665569	1.17277	0.240887	0.15557	0.876372	1.43847	0.1503	1.17138	0.241445	3.27484	0.00105721	-0.0675476	0.946146	2.90689	0.00365046	2.04542	0.0408135
rs2919996	2710400	DSC2	-0.0319059	0.974547	0.963368	0.335363	-1.00619	0.314326	1.4434	0.148908	2.06162	0.0392438	0.835065	0.403681	0.476287	0.63387	-0.654024	0.513096	0.678446	0.497489	0.43215	0.665632
rs13034649	3170440	BCL11A	-0.518876	0.603847	-0.74363	0.4571	0.513553	0.607564	-0.796288	0.425865	-0.529368	0.59655	-0.830271	0.406385	-0.146827	0.883268	-0.800634	0.423343	-0.776569	0.437413	-0.823858	0.41002
rs2601828	3060100	ADCY9	0.106271	0.915368	0.204408	0.838035	0.75038	0.453026	0.573742	0.566142	0.997014	0.318758	0.59849	0.549513	1.36458	0.172386	0.653656	0.513334	1.30067	0.193371	1.28288	0.199536
rs12470505	940382	SLC23A3	0.721579	0.470553	-0.430158	0.667081	-0.0156834	0.987487	0.210356	0.83339	0.173781	0.862038	-0.0156077	0.987547	1.96809	0.0490576	1.61941	0.10536	0.950129	0.342047	1.46445	0.143072
rs3924021	6900288	YTHDC1	0.0292096	0.976697	0.773083	0.439473	-1.90599	0.056652	0.951461	0.34137	0.779502	0.435684	0.139527	0.889034	-0.299675	0.764425	0.554613	0.57916	-0.442791	0.657917	-0.194342	0.845908
rs3008338	4780520	-	0.665164	0.505946	0.0616533	0.950839	0.507812	0.611585	-0.740894	0.458758	1.51206	0.130519	1.7076	0.0877105	0.950433	0.341892	-0.0602576	0.95195	1.86172	0.0626422	1.71313	0.0866893
rs7578130	3390075	PTPN4	-1.21599	0.223989	0.56513	0.571985	1.09392	0.273992	0.637328	0.523911	-0.183683	0.854262	-1.66916	0.0950856	0.898782	0.368769	-0.449374	0.653162	1.26075	0.2074	0.529084	0.596747
rs6733332	7000017	CAB39	-0.200846	0.840819	-0.330934	0.740695	0.729852	0.465481	-0.645066	0.518884	-1.03267	0.301757	-1.44549	0.148321	-2.1148	0.0344473	-1.31086	0.189906	-0.987163	0.323563	-2.80315	0.0050606
rs9120	6770504	MYO9A;CTD-2524L6.3	-0.415269	0.677945	2.24147	0.0249959	-2.43617	0.0148438	1.74746	0.0805578	1.2287	0.219183	-0.237336	0.812396	-0.880547	0.378563	-0.376961	0.706203	-0.434064	0.664242	0.673349	0.500725
rs4506869	5810685	THBS1	-0.125752	0.899928	2.33321	0.019637	-2.08825	0.0367752	3.19245	0.00141071	1.89746	0.0577668	1.57759	0.11466	-1.77224	0.0763543	-0.0831301	0.933748	0.160052	0.87284	-0.198212	0.842879
rs9470361	5690632	PI16	0.0129664	0.989655	0.29003	0.771793	-0.215888	0.829075	0.639391	0.522569	-1.38747	0.1653	-1.31957	0.18698	0.0997946	0.920507	-0.265095	0.790937	-0.727075	0.46718	-0.279369	0.779962
rs12135469	4810053	ANKRD13C	1.41944	0.155772	0.708847	0.47842	-0.474812	0.634921	0.506331	0.612625	1.07316	0.283202	1.16164	0.245381	-1.62763	0.103603	0.637847	0.523573	-0.47047	0.638019	-0.304587	0.760681
rs11107518	7050471	CCDC41	-1.36306	0.172864	-0.894855	0.370864	-0.220638	0.825375	-0.622522	0.533599	0.105354	0.916095	-1.25322	0.210126	2.33398	0.019597	-0.198406	0.842727	1.48341	0.137966	0.760987	0.446665
rs2054989	6250435	ARHGEF3	-1.3451	0.178591	2.14547	0.031915	-1.88835	0.0589786	2.81408	0.00489172	0.776001	0.437749	-0.492318	0.622495	-0.462045	0.644049	-0.247722	0.80435	0.170194	0.864858	0.948228	0.343014
rs6731423	160338	-	0.576329	0.564393	-1.72907	0.0837964	1.7047	0.0882496	-1.66997	0.0949248	-1.28852	0.197564	-0.0427303	0.965917	1.5896	0.111924	1.79741	0.0722699	-0.0358753	0.971382	-0.135465	0.892244
rs12940887	830132	PHOSPHO1	-0.288116	0.773258	-0.640394	0.521916	0.712683	0.476042	0.751061	0.452616	-0.493313	0.621792	-0.509565	0.610356	0.0718724	0.942703	-0.810639	0.417573	-0.739827	0.459405	0.68254	0.494898
rs4794820	1500112	ORMDL3	-3.11619	0.00183206	1.22511	0.220534	-0.525748	0.599063	1.45448	0.145814	1.05473	0.291549	-1.51786	0.129049	0.724834	0.468554	-0.697697	0.485367	1.56542	0.117484	-0.16016	0.872755
rs7672	6480037	PLA2G15	-1.36917	0.170947	-0.0640809	0.948906	0.386971	0.698777	-0.476894	0.633438	-0.361335	0.717849	-0.982402	0.325902	-0.749055	0.453824	-1.99378	0.046176	-0.87372	0.382271	-0.365845	0.714481
rs1637728	650347	NUDT1	1.25862	0.208168	-1.76079	0.0782735	6.85457	7.15289e-12	-1.34646	0.178155	1.13654	0.255729	1.39401	0.163314	-0.523348	0.600732	-0.747863	0.454543	0.272623	0.785143	2.29169	0.0219236
rs3820201	2320653	ECHDC2	-0.96625	0.333919	-0.450876	0.652079	-1.21786	0.223278	0.829772	0.406668	0.0791949	0.936878	-1.1352	0.256291	-0.114091	0.909166	0.281821	0.778081	0.291498	0.77067	-0.428076	0.668596
rs8102476	6020468	SPINT2;PPP1R14A	2.67608	0.00744881	-2.26924	0.0232539	3.77957	0.000157097	-1.86	0.062885	-1.02476	0.305477	1.71905	0.0856048	-2.00215	0.0452683	1.37909	0.167867	-2.09663	0.036026	1.52253	0.127875
rs1029296	7330392	PSMB9;TAP1;XXbac-BPG246D15.8	0.602938	0.54655	-0.286538	0.774466	-0.341047	0.733068	-1.26639	0.205375	0.407567	0.683592	0.158829	0.873804	0.090052	0.928246	0.918966	0.358113	0.0892125	0.928913	-0.072135	0.942494
rs6657670	5910500	SYT11	-0.571003	0.567997	2.327	0.0199651	-1.02293	0.306342	0.920698	0.357208	2.23268	0.0255698	-0.0757593	0.939611	-1.36667	0.171728	-0.666004	0.505409	1.41942	0.155777	0.236413	0.813112
rs16948048	830132	PHOSPHO1	-0.162865	0.870625	-0.556295	0.578009	0.482983	0.629108	0.853698	0.393272	-0.666727	0.504946	-0.374951	0.707697	-0.182455	0.855225	-0.920276	0.357428	-1.09057	0.27546	0.601694	0.547378
rs1055129	3890398	WBP2	-0.48172	0.630005	-1.90233	0.0571283	2.02476	0.0428921	-0.575044	0.565262	-1.71154	0.086982	-1.50752	0.131678	0.957951	0.338087	-0.919418	0.357877	-0.461025	0.644781	-0.367652	0.713132
rs824115	70630	RNF144B	0.0922362	0.92651	-0.73445	0.462674	0.139185	0.889304	-0.437132	0.662016	0.1582	0.874299	0.00861593	0.993126	1.07719	0.281395	0.510434	0.609748	0.579922	0.561967	0.628208	0.529867
rs3094000	3170064	MICB	-1.05788	0.290111	1.2825	0.199667	0.0162146	0.987063	2.17942	0.0293002	1.17744	0.239022	-0.132554	0.894546	0.31106	0.755755	-0.703989	0.48144	0.466753	0.640676	0.714526	0.474902
rs4728142	2230431	IRF5	-0.573518	0.566294	0.215871	0.829088	1.14226	0.253348	2.22792	0.0258861	-1.61945	0.105351	-1.3053	0.191791	0.341723	0.73256	0.22924	0.818683	-0.99704	0.318745	0.239677	0.810581
rs6603859	2030044	SZRD1;SPATA21	0.101604	0.919071	0.240267	0.810123	-0.508242	0.611284	0.771023	0.440693	0.602231	0.54702	-0.0621747	0.950424	-0.311596	0.755348	0.630994	0.528045	0.408962	0.682568	-0.0113975	0.990906
rs1470579	2940349	SENP2	0.472453	0.636603	-0.533131	0.593943	0.469199	0.638927	0.0425192	0.966085	-0.52527	0.599396	-0.496301	0.619682	0.239615	0.810629	0.678586	0.4974	-0.574675	0.565511	1.73971	0.0819093
rs9277535	540563	HLA-DMB;HLA-DMA	-1.09331	0.274258	-0.403764	0.686386	0.468844	0.639181	-1.38349	0.166514	-0.689691	0.490389	-0.932911	0.350866	1.55051	0.121019	0.270351	0.786891	0.85422	0.392983	0.355047	0.722554
rs6088813	1170095	UQCC	-0.747145	0.454976	1.42811	0.15326	-0.691776	0.489078	0.398548	0.690226	0.926193	0.354346	0.213827	0.830682	-1.84859	0.0645163	0.995471	0.319507	0.251074	0.801757	-0.195675	0.844864
rs7571971	3400482	RPIA	0.112152	0.910703	-1.38493	0.166073	3.03552	0.00240122	-1.26299	0.206594	-0.435604	0.663124	0.298601	0.765244	-1.22523	0.220489	-0.539191	0.589755	0.0443301	0.964641	-0.241011	0.809547
rs10214886	6450692	PSMB9	0.753521	0.451137	-1.35813	0.174423	0.85076	0.394902	-1.31791	0.187533	-0.487097	0.62619	1.38343	0.166533	1.01741	0.308959	0.444369	0.656776	0.0756677	0.939683	0.241106	0.809473
rs17322327	5860753	-	0.669446	0.503211	-0.590473	0.554874	-0.758624	0.448078	0.279348	0.779978	1.49473	0.134985	-0.115253	0.908245	1.09936	0.27161	1.69432	0.0902046	2.77259	0.00556118	1.94476	0.0518034
rs639858	7050670	SAFB2	0.101769	0.91894	0.99359	0.320422	-0.136418	0.891491	-0.0885859	0.929411	1.10658	0.268475	1.05941	0.289414	-0.336965	0.736143	0.298452	0.765358	-0.141496	0.887478	-0.815649	0.414701
rs337190	770564	C1orf115	0.113577	0.909573	0.136458	0.891459	1.33386	0.182249	2.88294	0.00393984	-1.62016	0.105197	-1.34943	0.177199	-1.46829	0.142026	-0.797614	0.425095	-2.18164	0.029136	-0.314392	0.753224
rs10794720	7210040	WDR37	-0.0603164	0.951904	0.374014	0.708394	-0.746301	0.455485	-0.132402	0.894666	-0.683473	0.494308	-1.21941	0.222689	-0.431746	0.665926	-1.06816	0.285448	-1.16793	0.242835	-0.412081	0.68028
rs4523530	3120609	PPOX	-1.09321	0.274301	1.17268	0.240925	-0.722956	0.469707	1.55218	0.12062	0.364877	0.715203	0.171495	0.863835	-0.364271	0.715656	0.823112	0.410444	0.581589	0.560844	0.75429	0.450675
rs4806884	7400554	WDR18	1.65743	0.0974318	1.1648	0.244101	-3.11523	0.00183803	1.40999	0.158542	-0.551811	0.581078	-2.08084	0.0374485	-0.783007	0.433623	-2.14448	0.0319943	-1.00934	0.31281	-1.71187	0.0869212
rs12479254	6200113	ING5	0.768721	0.442059	-0.225699	0.821435	0.738564	0.460172	-1.40351	0.160464	-0.63761	0.523728	0.47579	0.634224	-1.75167	0.0798309	0.0520229	0.95851	-0.446544	0.655205	0.698225	0.485037
rs7255045	2760370	CTC-425F1.4;CALR	-1.22337	0.221191	-0.60186	0.547267	1.23243	0.217788	-0.719637	0.471748	-0.215082	0.829704	-1.83758	0.066124	1.69828	0.0894558	-0.746219	0.455535	1.05397	0.291896	1.36785	0.171359
rs6011002	6420450	ZGPAT;LIME1;SLC2A4RG	0.670296	0.502669	0.151101	0.879896	0.648856	0.516431	-0.409048	0.682504	0.519906	0.603129	0.174992	0.861086	-1.25939	0.207888	-1.15423	0.248405	0.259744	0.795061	0.205912	0.83686
rs13071905	3830273	NIT2	-0.439154	0.66055	2.60968	0.0090626	-1.69589	0.089907	2.43483	0.0148988	0.215237	0.829582	-0.811717	0.416954	-1.47729	0.139599	0.297474	0.766105	-1.03793	0.299303	-0.44824	0.65398
rs16996148	1570373	GATAD2A	-0.6174	0.536971	-0.565617	0.571654	1.36359	0.172697	-0.732735	0.46372	-0.171027	0.864203	-0.647645	0.517215	0.395007	0.692838	-0.0129722	0.98965	0.759724	0.44742	1.63704	0.101623
rs8012	4060731	GCDH	1.2004	0.229982	1.10911	0.267383	0.538163	0.590465	1.54612	0.122075	1.58502	0.112962	1.46548	0.14279	-1.85985	0.0629072	1.1565	0.247479	-0.0592996	0.952714	1.78798	0.07378
rs3780926	20521	MASTL	1.22858	0.219229	4.59734	4.27917e-06	-2.20339	0.0275671	3.31524	0.000915639	3.39296	0.00069142	1.72399	0.0847092	-1.49027	0.136154	0.224931	0.822033	-1.0473	0.294961	-0.256226	0.797776
rs6461936	3360634	AC004540.4;SNX10	0.272834	0.784981	1.50814	0.131518	-0.447138	0.654775	1.448	0.147616	1.93154	0.0534169	-0.0271041	0.978377	-0.0149029	0.98811	-0.318663	0.749982	1.22287	0.221378	1.16247	0.245046
rs2066808	130519	STAT2	-0.0631235	0.949668	1.44317	0.148973	-0.0820785	0.934584	2.15866	0.0308768	1.06542	0.286686	0.174371	0.861574	-1.44782	0.147667	-0.219351	0.826377	-0.442363	0.658226	0.39775	0.690815
rs12027135	1030768	LDLRAP1	-0.624163	0.53252	0.0209127	0.983315	0.297417	0.766148	-0.799124	0.424218	-0.395727	0.692306	0.0772779	0.938402	-0.0339935	0.972882	-0.227847	0.819765	-0.65502	0.512455	-0.540295	0.588994
rs1913185	7040477	RP11-274H2.2;PLOD2	-0.303582	0.761446	1.42551	0.15401	0.454514	0.649459	0.631852	0.527484	0.410553	0.6814	0.421559	0.673347	-1.08889	0.276203	1.23011	0.218654	-0.874296	0.381957	-0.533183	0.593907
rs2872507	1500112	ORMDL3	-1.88948	0.058827	0.852185	0.394111	-0.361756	0.717535	1.01313	0.310999	0.821533	0.411343	-1.29519	0.195256	0.347015	0.72858	0.0715467	0.942963	1.59291	0.11118	-0.293691	0.768994
rs11258317	6250168	-	2.54502	0.0109272	-1.05982	0.289226	-0.84881	0.395987	-0.641276	0.521344	0.916721	0.359289	1.7398	0.0818942	2.02814	0.0425457	2.64794	0.00809847	1.49407	0.135158	2.80916	0.00496704
rs11132156	2480612	DCTD	-1.43375	0.151644	1.22462	0.220718	0.897964	0.369205	1.06626	0.286304	0.0526835	0.957984	0.0677185	0.94601	0.495546	0.620215	-0.566509	0.571048	-0.190891	0.848611	0.280902	0.778786
rs7421813	1660685	CTD-2252P21.1;ARHGAP15	-0.397018	0.691354	-0.377176	0.706043	1.45664	0.145215	-0.704194	0.481312	0.610675	0.541415	0.557755	0.577012	0.536984	0.591279	-0.541994	0.587822	1.44409	0.148714	1.69911	0.0892978
rs7134594	5390754	MYO1H;KCTD10	0.895134	0.370715	1.0296	0.303198	-0.729024	0.465987	1.27899	0.2009	1.40264	0.160723	0.817329	0.413741	-0.00178585	0.998575	0.56311	0.57336	0.689748	0.490353	1.7677	0.0771114
rs308099	510743	ZNF815P	-0.633857	0.526174	-0.0013077	0.998957	-0.0998639	0.920452	-1.36891	0.171026	-0.00266235	0.997876	-1.2041	0.228549	1.65586	0.0977504	-1.26034	0.207548	1.00286	0.315928	0.400044	0.689124
rs901975	4590537	ERAL1	1.73602	0.0825596	-1.86713	0.0618841	3.29207	0.000994537	-1.50595	0.132081	-1.15369	0.248626	0.633461	0.526433	-0.684425	0.493707	0.755947	0.449681	-0.879296	0.379241	0.654355	0.512883
rs17314713	5670082	SGCG	-1.61012	0.107373	-0.502878	0.61505	-0.391666	0.695305	-0.35165	0.725101	-0.552818	0.580388	-1.2265	0.22001	1.07792	0.281071	-0.0742665	0.940798	1.11817	0.263493	-0.0710739	0.943339
rs6025552	3420372	RBM38	0.211941	0.832153	-1.24854	0.211835	0.463728	0.642843	-2.00299	0.0451781	1.53765	0.124134	0.444408	0.656748	1.52477	0.127317	-0.65602	0.511811	1.46837	0.142003	0.943406	0.345474
rs2554348	2970674	LEO1	-0.312101	0.754964	-0.989746	0.322298	1.08508	0.277887	-0.489027	0.624822	-2.10907	0.0349382	-0.781055	0.43477	-2.02373	0.0429977	0.0648455	0.948297	-2.8608	0.00422577	-2.33577	0.0195034
rs4688011	6550288	POGLUT1	-1.69614	0.0898587	0.165156	0.868821	0.422414	0.672723	0.547897	0.583763	0.625772	0.531465	-0.523027	0.600955	-0.147468	0.882762	-0.941908	0.34624	0.11644	0.907304	-0.84	0.400908
rs751837	4200703	AMN;CDC42BPB	-0.845302	0.397942	-0.59538	0.551589	-0.210436	0.833328	0.352128	0.724742	0.379719	0.704154	-1.09579	0.27317	0.0939963	0.925112	-1.6615	0.0966134	-0.448551	0.653756	-0.607051	0.543817
rs4392868	2190634	PLEKHF2	0.897084	0.369674	1.16887	0.242454	-0.672324	0.501378	1.04692	0.295136	1.03699	0.299741	1.01043	0.312289	-0.918247	0.35849	1.0728	0.283361	-0.20553	0.837158	-0.627135	0.530571
rs788249	1190717	BMS1	-0.829361	0.4069	-1.37521	0.169065	1.03778	0.299374	-0.171703	0.863671	-1.49595	0.134667	-2.16703	0.0302327	1.3018	0.192985	0.0213534	0.982964	0.109904	0.912486	0.24093	0.809609
rs1044825	5810221	CACNA2D4	0.819392	0.412563	0.258605	0.79594	-0.695733	0.486596	-0.017786	0.98581	-1.40933	0.158736	-0.846302	0.397384	-0.414928	0.678195	0.385485	0.699878	-3.3973	0.000680534	1.48856	0.136602
rs4132699	4880408	SEMA4D	-0.553857	0.579677	0.198068	0.842992	0.560211	0.575336	-0.816	0.4145	-0.139404	0.889131	-0.332338	0.739634	1.25572	0.209217	0.0450458	0.964071	0.0138207	0.988973	1.22798	0.219453
rs10488631	2230431	IRF5	0.12217	0.902765	0.838759	0.401605	-0.659535	0.509552	0.938969	0.347747	1.03097	0.302557	0.854089	0.393056	-1.17674	0.2393	-0.249664	0.802847	-0.308958	0.757353	0.0590207	0.952936
rs2124440	7200768	ITGA4	2.35577	0.0184843	-0.386417	0.699188	-0.358057	0.720301	-0.4193	0.674997	3.06928	0.00214575	2.51918	0.0117627	0.500973	0.61639	1.35726	0.174699	1.22406	0.220929	0.779165	0.435883
rs4963243	3460161	RAB3IL1	-0.693388	0.488066	-0.97882	0.327669	1.38594	0.165766	-0.774071	0.438889	0.217501	0.827818	-0.546811	0.584509	0.136952	0.891068	0.689812	0.490313	0.18468	0.85348	0.699302	0.484363
rs7819483	2850465	RP13-582O9.5	-0.229681	0.81834	0.466577	0.640803	-0.125098	0.900446	0.535811	0.592089	0.564845	0.57218	0.43144	0.666149	2.10372	0.0354027	-0.12987	0.896669	1.10906	0.267403	0.830007	0.406535
rs3865444	7050050	CD33	0.506432	0.612554	-1.10028	0.271211	2.30129	0.021375	-1.31225	0.189435	-0.607681	0.543399	-0.767564	0.442746	0.176077	0.860233	-0.37786	0.705534	-0.678641	0.497365	0.0966415	0.923011
rs4702718	2710491	DAP	-1.57489	0.115283	0.327243	0.743484	-2.11264	0.0346313	0.887404	0.374861	0.462354	0.643827	-0.962722	0.335687	1.01553	0.309853	0.0515684	0.958873	0.731024	0.464764	-0.743293	0.457304
rs2855812	2640301	TNF	-0.384223	0.700813	-0.499413	0.617488	1.27885	0.200952	-1.47393	0.140502	0.0525158	0.958118	0.0652957	0.947939	0.234133	0.814882	0.871448	0.38351	0.0678331	0.945918	0.398843	0.690009
rs258322	4810274	SPG7	0.609704	0.542058	1.83054	0.067169	0.0446978	0.964348	0.70497	0.480829	0.305143	0.760258	1.05962	0.289317	-2.00855	0.0445845	0.810001	0.41794	-1.21057	0.226059	0.520814	0.602496
rs9673084	2370093	COMMD4	-1.61357	0.10662	1.58163	0.113734	-0.73647	0.461445	1.36768	0.171414	0.970419	0.331837	-0.533991	0.593348	0.431708	0.665953	-0.227317	0.820177	1.39297	0.163629	0.826391	0.408582
rs227584	4570224	C17orf53	1.00432	0.315227	-0.799996	0.423713	1.73001	0.0836286	-0.343611	0.731139	-0.770047	0.441272	-0.00289536	0.99769	0.760688	0.446843	-0.511109	0.609275	0.267392	0.789167	0.696849	0.485897
rs2657880	2750039	RBMS2	2.53792	0.0111513	-0.779263	0.435825	-0.0317824	0.974646	-0.196765	0.844011	0.104858	0.916489	0.949433	0.3424	1.24616	0.212707	3.07675	0.00209269	0.974471	0.329823	3.19337	0.00140624
rs513349	6180133	ITPR3	0.684371	0.493741	0.136666	0.891295	-0.163788	0.869898	-0.572737	0.566823	0.622529	0.533594	0.24592	0.805744	-1.40122	0.161149	0.633576	0.526358	-0.725961	0.467862	-1.19037	0.233902
rs2159128	1240152	CFD	2.13244	0.0329703	-0.54459	0.586035	0.681814	0.495356	1.19393	0.232505	0.556599	0.577802	1.39796	0.162124	1.87594	0.0606635	1.46182	0.14379	0.756986	0.449058	1.93767	0.0526632
rs7246953	3420497	KEAP1	0.94133	0.346536	-0.516527	0.605486	-0.943487	0.345432	0.715316	0.474414	0.748929	0.4539	-0.257735	0.796611	1.29907	0.193919	1.38123	0.167207	0.785119	0.432384	1.09274	0.274508
rs12934376	6450189	WWOX	-1.22737	0.219682	0.922091	0.356481	0.103614	0.917476	0.602293	0.546979	-0.205498	0.837183	-0.676473	0.49874	-0.893892	0.37138	0.476844	0.633473	-0.970419	0.331838	-0.617288	0.537045
rs1826421	3990767	FBXO28	-0.21557	0.829323	4.16597	3.10028e-05	-2.91199	0.00359129	3.83352	0.000126324	3.55411	0.000379267	1.11759	0.263742	-1.48172	0.138414	2.41925	0.0155525	0.29165	0.770554	-0.109376	0.912904
rs11211176	4830494	CCDC17	-1.12749	0.259537	-1.67952	0.0930513	1.08012	0.280087	-1.27555	0.202116	-0.502755	0.615136	0.494081	0.621249	1.84765	0.064653	-0.539828	0.589316	0.14729	0.882903	-0.0582709	0.953533
rs4719329	1260364	ARL4A	-1.10134	0.27075	-0.319293	0.749504	1.34356	0.179089	0.66596	0.505436	1.68314	0.0923483	-0.725417	0.468196	1.75456	0.079335	-1.03032	0.302859	2.51544	0.0118882	1.20759	0.227205
rs7758062	3060767	MANEA	-1.37884	0.167943	3.33252	0.000860645	-1.75955	0.0784836	3.67054	0.000242042	3.13158	0.00173871	0.194071	0.846121	0.930212	0.352261	-0.288609	0.772881	2.55102	0.0107409	2.48532	0.0129436
rs12191877	3170064	MICB	-1.62542	0.104073	1.64648	0.0996645	-0.889016	0.373995	1.42161	0.155139	0.643409	0.519959	-0.705653	0.480404	-1.20394	0.228612	0.0221752	0.982308	-0.804762	0.420957	-0.695065	0.487014
rs1888825	1570255	DEF6	1.22653	0.22	0.59111	0.554447	0.767087	0.44303	0.62418	0.532509	3.24656	0.00116809	2.67875	0.00738981	1.37193	0.170085	2.6565	0.00789574	2.99827	0.0027152	3.01341	0.0025833
rs4073513	6580608	PEX16	0.806997	0.419668	0.644341	0.519354	-1.29157	0.196505	0.332482	0.739525	0.320619	0.748499	1.25376	0.209929	-0.263421	0.792226	1.13167	0.257774	-0.312286	0.754823	-0.111564	0.911169
rs6464928	4060068	PDIA4	-0.187071	0.851605	-0.238359	0.811603	1.11577	0.264522	-0.376163	0.706796	-0.667469	0.504472	-0.545364	0.585503	0.640469	0.521868	-0.32641	0.744114	-0.117991	0.906074	-0.648488	0.51667
rs6586111	5960168	FAM213A	-0.554923	0.578947	0.999348	0.317626	-0.2316	0.816848	0.701692	0.482871	0.0677664	0.945972	-0.338974	0.734629	-0.383924	0.701035	0.356053	0.721801	-0.78249	0.433927	0.378329	0.705186
rs1320561	5720369	THBD	0.385354	0.699975	-0.992333	0.321035	0.442205	0.658341	-0.071291	0.943166	-0.467965	0.639809	0.212853	0.831442	1.00212	0.316287	-0.359631	0.719123	1.06708	0.285937	0.138057	0.890196
rs4353250	4760521	HPS5	0.0994286	0.920798	-0.169976	0.865029	-0.186532	0.852028	0.377261	0.70598	0.181434	0.856027	1.07957	0.280335	-0.417317	0.676447	0.209777	0.833841	-0.564731	0.572257	-0.273633	0.784367
rs4246905	1240209	TNFSF8	0.959737	0.337188	1.38144	0.167143	-0.383183	0.701584	-0.626114	0.53124	2.45841	0.0139553	1.58708	0.112495	1.41135	0.15814	1.00894	0.313001	2.74723	0.00601002	1.82844	0.067484
rs1126757	3520121	RPL28	1.36806	0.171293	1.54567	0.122184	-1.99672	0.0458555	0.679294	0.496952	0.682223	0.495098	0.367645	0.713138	0.169024	0.865778	-0.0430209	0.965685	-0.817584	0.413595	-1.42781	0.153347
rs1950500	5360612	-	-2.71206	0.00668669	1.37438	0.169324	-1.15929	0.246337	0.120109	0.904397	0.394316	0.693348	-1.47539	0.140108	1.12847	0.25912	-0.111235	0.91143	1.18848	0.234644	-0.357626	0.720623
rs3738815	610424	CROCC	0.181564	0.855925	-0.645779	0.518423	-1.10136	0.270739	0.0607903	0.951526	-1.18104	0.237586	0.0101222	0.991924	0.662842	0.507432	-0.674737	0.499843	-0.716671	0.473577	-0.741951	0.458117
rs12188164	2070164	CCDC127	0.360214	0.718687	-1.27321	0.202944	1.23894	0.215368	-0.79955	0.423971	-0.450771	0.652155	-0.0260166	0.979244	0.78483	0.432553	-0.771551	0.44038	1.39141	0.164102	1.71079	0.0871202
rs7214056	3180181	UBE2G1	1.33155	0.183009	0.0569664	0.954572	-0.503686	0.614482	-0.922483	0.356277	-0.721099	0.470848	0.916043	0.359644	0.0242253	0.980673	0.981902	0.326148	0.917667	0.358793	2.19787	0.0279587
rs10793446	5670095	ZNF239	1.19588	0.231743	1.31772	0.187599	-0.221184	0.824949	2.05579	0.0398026	1.21819	0.223153	1.45353	0.146076	-0.626494	0.530991	-0.0418243	0.966639	0.203901	0.838431	1.50165	0.133187
rs6499119	5550576	LRRC29	0.770715	0.440876	-1.02153	0.307003	1.7076	0.0877111	0.193441	0.846614	-1.62276	0.10464	-0.108906	0.913277	-1.70077	0.0889867	-0.996601	0.318958	-2.2923	0.0218885	-0.417305	0.676455
rs1472631	1570669	LACTB;RPS27L	1.27924	0.200811	-2.51601	0.0118692	0.160908	0.872166	-2.6271	0.00861167	-2.00503	0.0449602	-1.48813	0.136717	0.994007	0.320219	0.615075	0.538505	0.0440477	0.964866	-2.0169	0.043706
rs165609	6770672	MED15	-0.0135847	0.989161	-4.20451	2.61653e-05	2.11837	0.0341439	-3.0474	0.00230831	-2.87843	0.00399665	-2.36768	0.0179001	4.94194	7.73488e-07	1.48996	0.136234	0.253082	0.800205	3.01831	0.00254191
rs17818399	4010477	ATP6V1E2	-1.10178	0.270558	1.50754	0.131673	-0.627675	0.530217	0.205668	0.83705	0.940934	0.346738	0.061028	0.951337	-0.683916	0.494028	-0.849986	0.395333	-0.949084	0.342578	-0.613175	0.539761
rs7406705	3310097	TSPAN10	-0.793811	0.427305	1.22507	0.220547	-0.645114	0.518853	0.580499	0.561578	-0.178476	0.858349	-1.62374	0.104432	-0.450168	0.65259	-1.80672	0.0708066	-0.75099	0.452658	-1.35685	0.174828
rs17418706	990500	AVPI1	-0.970203	0.331946	0.464019	0.642634	-0.468373	0.639518	0.599381	0.548919	-0.339248	0.734423	-1.69262	0.0905282	-0.472661	0.636455	-0.322105	0.747373	-0.645718	0.518462	-1.42469	0.154246
rs7251	150397	IRF3	1.38833	0.165036	1.14295	0.253059	0.0197879	0.984213	0.692803	0.488433	0.675699	0.499232	1.89101	0.0586229	-0.248931	0.803414	0.39258	0.69463	-0.968353	0.332868	0.383817	0.701114
rs40601	5870286	AMACR;C1QTNF3	4.19252	2.75868e-05	1.36083	0.173566	0.554823	0.579016	0.521868	0.601762	1.35523	0.175345	3.16741	0.00153802	-1.44877	0.147402	1.19152	0.233451	-0.415841	0.677526	2.58796	0.00965467
rs2242663	2260220	B3GNT1	-0.0130523	0.989586	-0.285855	0.774989	-0.441073	0.65916	-0.639101	0.522757	-0.998854	0.317865	-0.550933	0.581679	1.06987	0.284677	-0.105563	0.915929	-0.196853	0.843942	0.799503	0.423999
rs1055302	4210039	-	0.493421	0.621715	1.57538	0.115168	-2.30996	0.0208901	1.65345	0.0982393	0.929784	0.352483	1.4938	0.135228	0.294501	0.768375	1.56209	0.118267	1.02199	0.306787	1.47564	0.140041
rs11722849	1050132	ZNF518B	-0.00113288	0.999096	-0.49712	0.619104	0.443324	0.657532	-0.497848	0.618591	-0.755323	0.450055	0.0959792	0.923537	-0.259269	0.795428	-1.53841	0.123948	-0.110458	0.912046	0.546515	0.584712
rs12034407	7040270	AL513327.1;ZNF362	0.358888	0.719679	-0.22137	0.824805	0.612548	0.540175	-1.33143	0.183047	-0.823073	0.410467	0.274711	0.783538	0.557275	0.57734	1.81714	0.0691955	-0.799892	0.423774	0.829486	0.40683
rs969660	1260445	SLC26A8	1.05926	0.28948	0.506018	0.612844	-0.252312	0.8008	-0.0746445	0.940498	0.109687	0.912657	0.637767	0.523626	-0.676606	0.498656	-0.130577	0.89611	-0.605881	0.544594	-0.0308913	0.975356
rs3800794	2230039	ABCF2	-0.764105	0.444805	1.71177	0.0869385	0.164394	0.869421	2.07554	0.0379365	0.530748	0.595593	-0.544426	0.586148	-1.05991	0.289186	-0.0583996	0.95343	0.213339	0.831063	-0.777298	0.436983
rs10495222	5560398	DEGS1	-1.45003	0.147051	0.415412	0.67784	-1.00725	0.313816	2.01617	0.0437822	0.42321	0.672142	-2.16468	0.0304123	0.418571	0.67553	-0.896662	0.3699	-0.00689498	0.994499	-0.266753	0.789659
rs2286649	3370603	SPAG9	-0.102428	0.918417	-0.150405	0.880445	0.690273	0.490023	-1.4619	0.143768	-0.589912	0.55525	-0.0405283	0.967672	-0.31404	0.753491	-0.116823	0.907	-0.751273	0.452488	-0.786644	0.43149
rs11228	3780167	ZNF200;AJ003147.9	1.6473	0.0994968	1.25099	0.210938	-1.47477	0.140274	1.77205	0.0763856	2.34895	0.0188262	2.49027	0.0127645	-0.998961	0.317814	2.27038	0.0231844	0.993673	0.320382	2.0875	0.0368433
rs887864	2470386	CIITA;DEXI	0.0411034	0.967213	-0.696927	0.485849	0.833824	0.40438	0.307915	0.758147	1.20677	0.22752	0.668767	0.503644	1.87502	0.06079	2.20503	0.0274523	1.71164	0.0869626	1.43673	0.150795
rs1165151	10066	SLC17A3	0.111079	0.911554	0.281425	0.778384	-0.873077	0.382621	0.571691	0.567531	-0.0260066	0.979252	-0.472777	0.636372	0.394621	0.693123	-0.109514	0.912795	-0.12394	0.901363	0.35027	0.726136
rs6788548	990703	ZBTB47	1.92358	0.0544077	1.46281	0.143521	-0.549558	0.582622	1.79452	0.0727308	1.55742	0.119371	2.03507	0.0418434	0.42917	0.6678	0.870669	0.383935	0.267808	0.788847	1.50627	0.131998
rs4698036	1050132	ZNF518B	1.0378	0.299365	0.672636	0.501179	-0.973378	0.330365	1.13451	0.256579	1.33221	0.182791	1.78267	0.0746407	-1.34162	0.17972	1.80185	0.071569	0.0804606	0.935871	0.0962027	0.92336
rs10892722	6220397	SC5DL	-0.791701	0.428535	0.54863	0.58326	0.399643	0.689419	0.370414	0.711074	0.331646	0.740157	0.114239	0.909048	0.217884	0.827519	1.11858	0.263321	0.856387	0.391784	0.319541	0.749317
rs513438	5090014	CCDC90B	0.377272	0.705971	-1.78347	0.07451	1.99802	0.0457147	-1.67581	0.093775	-1.72	0.0854316	-2.06879	0.0385659	1.82255	0.0683712	0.017414	0.986106	-0.303467	0.761534	0.967396	0.333346
rs4963176	1470382	IRF7	-0.369868	0.711481	-0.411427	0.680759	0.323593	0.746246	0.139044	0.889416	-0.647923	0.517035	-0.955033	0.339561	0.59277	0.553335	1.51768	0.129094	-0.175024	0.86106	-0.800821	0.423235
rs9302752	3460692	RP11-327F22.4;CYLD	-1.24925	0.211575	0.921069	0.357015	-0.386875	0.698849	-0.243923	0.80729	1.14569	0.251922	-0.280812	0.778854	0.582505	0.560226	0.8189	0.412844	1.13919	0.254626	0.634574	0.525706
rs2647528	7550608	TMEM9B	-0.669974	0.502874	-0.390645	0.69606	-0.620797	0.534733	0.5691	0.569289	-0.368542	0.712469	-0.942323	0.346027	0.613151	0.539777	-1.66401	0.0961105	-0.580947	0.561276	-0.181773	0.855761
rs271399	5720056	MED10	-0.625917	0.531369	1.99278	0.0462853	-1.04539	0.295844	0.844272	0.398517	0.374808	0.707803	0.761563	0.446321	-2.64566	0.00815312	0.642452	0.520579	-1.74585	0.0808362	-2.73771	0.00618694
rs1430742	6940280	GNG12-AS1;WLS	1.4171	0.156455	-1.06476	0.286986	2.15699	0.0310067	-0.0095747	0.992361	-0.696198	0.486305	0.970171	0.331961	-0.579013	0.562581	1.93276	0.0532657	-1.23719	0.216016	0.600538	0.548148
rs857684	4060075	SPTA1	-1.42897	0.153014	-0.432409	0.665444	-0.123542	0.901678	-0.38909	0.697209	0.731999	0.464169	0.327847	0.743027	0.446614	0.655153	0.705181	0.480698	0.426065	0.67006	0.290329	0.771564
rs10876550	2070646	RP11-753H16.3;RP11-753H16.5;GPR84	2.88375	0.00392969	-2.30283	0.0212886	0.616201	0.537762	-1.64991	0.0989605	-0.113405	0.909709	1.86996	0.06149	-0.121553	0.903253	1.85444	0.0636766	-1.16292	0.244863	1.19599	0.231699
rs3827330	2850553	MORC2-AS1	-3.36582	0.000763156	0.898015	0.369178	-0.344981	0.730108	-0.435801	0.662981	-1.35423	0.175662	-2.99606	0.00273495	0.56986	0.568773	-3.26868	0.00108052	-0.395819	0.692238	-1.78462	0.0743228
rs6485788	5050670	NUP160	-0.611041	0.541172	0.548991	0.583012	1.71414	0.0865023	0.106079	0.91552	-1.27732	0.201489	-0.484067	0.628339	-1.84116	0.0655976	0.659457	0.509602	-1.87534	0.0607454	-0.898154	0.369104
rs12451466	3520601	MPO	-1.67954	0.0930473	0.00247048	0.998029	-0.353136	0.723986	1.04459	0.296213	-0.162184	0.871161	-0.879551	0.379103	-0.316462	0.751652	0.396632	0.691639	-0.23928	0.810889	-1.00135	0.316659
rs8049439	1230192	RP11-264B17.3;SPNS1	-1.02193	0.306815	-1.12779	0.259409	1.24078	0.214687	-2.50674	0.0121851	-0.113954	0.909274	-1.12249	0.261653	3.36685	0.000760324	-1.13645	0.255767	3.39607	0.0006836	1.87606	0.0606472
rs7620618	4150438	MLH1;LRRFIP2	1.94517	0.0517546	-1.95991	0.0500059	0.440783	0.65937	-0.225147	0.821865	0.473731	0.635692	2.22493	0.0260858	0.39303	0.694297	4.42841	9.49305e-06	0.141387	0.887564	0.328446	0.742574
rs10182687	4150142	SUCLG1	2.44204	0.0146046	-0.323244	0.74651	0.774705	0.438514	-1.08701	0.277035	0.411954	0.680373	1.39782	0.162167	-0.967892	0.333098	1.59579	0.110536	-0.737277	0.460954	2.18587	0.0288252
rs713586	3800050	CENPO;ADCY3	-3.696	0.000219021	4.01692	5.89628e-05	-1.88299	0.0597011	4.18795	2.81482e-05	1.75953	0.0784871	-2.23017	0.0257362	0.819839	0.412308	-4.49095	7.09059e-06	1.26079	0.207384	-0.241794	0.80894
rs3817334	1580133	CELF1	-0.043672	0.965166	-0.569779	0.568828	-1.43393	0.151593	-0.2647	0.79124	-0.404091	0.686146	-0.389669	0.696781	0.609843	0.541966	0.337002	0.736116	0.376464	0.706572	-0.113159	0.909904
rs7171171	6400348	C15orf53	0.500727	0.616563	-0.135927	0.891879	0.377803	0.705577	0.440702	0.659429	0.613559	0.539507	0.0680077	0.94578	-0.399075	0.689838	0.370109	0.711301	-0.296619	0.766758	-0.586643	0.557444
rs7957197	50414	HNF1A;C12orf43	0.273003	0.784851	0.528508	0.597147	-0.12025	0.904285	0.767234	0.442942	1.63153	0.102778	0.860337	0.389603	0.0629957	0.94977	-0.31531	0.752527	1.22825	0.219353	1.55193	0.120679
rs382745	4810274	SPG7	-2.13077	0.0331081	3.09644	0.0019586	-0.844086	0.398621	3.4667	0.000526885	0.177732	0.858933	-0.661929	0.508017	-2.41298	0.0158229	-0.0691532	0.944868	-3.19303	0.0014079	-2.31174	0.0207917
rs6032881	2690431	SLX4IP	1.92249	0.0545445	-1.59377	0.110988	-0.342183	0.732213	-0.409526	0.682154	-0.0529985	0.957733	1.61847	0.105561	2.10274	0.0354887	0.862307	0.388518	1.86832	0.0617177	1.73137	0.0833855
rs3774800	3400367	USP4	1.91321	0.0557213	-0.357114	0.721007	-0.27601	0.78254	0.141738	0.887287	0.785411	0.432212	1.24339	0.213725	0.421452	0.673425	1.33006	0.183498	-0.172487	0.863055	-0.323414	0.746382
rs10898392	2100274	SYTL2	-1.25949	0.207854	0.879907	0.37891	-0.670995	0.502224	0.548166	0.583578	0.410659	0.681323	-0.322906	0.746767	0.603912	0.545902	-0.430752	0.666649	0.999	0.317795	0.679446	0.496855
rs16912145	20392	CISD1	2.69954	0.00694352	0.0250679	0.980001	-0.333385	0.738843	0.901761	0.367184	1.57094	0.116198	2.14971	0.0315784	1.85394	0.0637473	2.85626	0.00428665	1.79071	0.0733401	2.82988	0.00465657
rs9277412	1050360	HLA-DPB1	1.07061	0.284347	3.21906	0.00128611	-2.01584	0.0438164	4.51408	6.35924e-06	2.98566	0.00282963	1.43993	0.149886	-0.080169	0.936103	2.65956	0.00782419	0.313429	0.753955	2.71046	0.00671898
rs3134792	780600	HCP5	-1.30551	0.191719	-0.788539	0.430381	0.422651	0.67255	-0.375847	0.70703	-0.0161537	0.987112	-0.97668	0.328728	1.28019	0.200478	0.723247	0.469528	0.22906	0.818823	0.0244581	0.980487
rs968451	70026	SYNGR1	-1.34336	0.179155	0.83727	0.402441	0.203712	0.838578	-0.366702	0.713841	-0.302472	0.762292	-1.72617	0.0843175	0.86926	0.384705	0.332616	0.739424	-0.281348	0.778443	0.610366	0.541619
rs6426239	4070224	ZNF496	0.990161	0.322095	0.324106	0.745858	-0.756542	0.449324	0.505732	0.613045	1.02845	0.303741	1.00021	0.317207	-0.958127	0.337999	0.930105	0.352317	-0.544324	0.586218	0.684871	0.493425
rs5743030	7650341	ORMDL1	0.156912	0.875314	-0.743903	0.456935	0.795701	0.426206	-0.306754	0.759031	0.866169	0.386398	-0.218842	0.826773	2.17275	0.0297989	-0.225301	0.821745	1.90395	0.0569171	1.31578	0.188248
rs507506	1240551	ACADVL	1.15752	0.247059	-2.07811	0.037699	1.85087	0.0641881	-1.62202	0.104799	-1.46792	0.142126	-0.289661	0.772076	0.446708	0.655086	-0.809393	0.418289	-1.34212	0.179556	-0.513608	0.607526
rs7216389	5390608	GSDMB	-1.09929	0.271642	0.892483	0.372134	-0.670814	0.502339	1.62264	0.104666	1.48275	0.13814	-0.658208	0.510404	5.2572	1.46267e-07	0.190206	0.849148	3.60825	0.000308273	3.39284	0.000691732
rs4849843	50446	INHBB	2.23512	0.0254092	0.253107	0.800185	-0.216691	0.828449	-0.310779	0.755969	1.11934	0.262993	2.09805	0.035901	0.169851	0.865127	0.454149	0.649722	0.951087	0.34156	1.52251	0.127881
rs598495	2850349	MED17	1.47838	0.139306	0.0349104	0.972151	0.866158	0.386404	1.16725	0.243111	-0.774354	0.438722	-0.0671417	0.946469	-2.47414	0.0133559	0.190447	0.848959	-2.80464	0.00503723	-0.554864	0.578988
rs7188919	2140228	CDR2	-0.274837	0.783441	-0.232148	0.816423	1.7957	0.0725418	-0.197109	0.843742	-0.697123	0.485726	-0.432433	0.665427	1.11902	0.263133	-0.841631	0.399994	0.851908	0.394265	0.580662	0.561468
rs151181	6250241	APOBR	0.93682	0.348851	2.25965	0.0238427	-1.70218	0.0887213	1.90894	0.0562702	1.61594	0.106108	1.4705	0.141427	-0.287109	0.774029	0.869275	0.384697	0.914077	0.360676	0.55352	0.579907
rs950027	7400619	SPATA5L1	0.580094	0.561851	1.42689	0.153612	-0.714878	0.474685	-0.158637	0.873955	2.02095	0.0432851	2.03837	0.041513	-0.849916	0.395372	1.98662	0.0469643	0.166564	0.867713	1.28472	0.19889
rs11983172	1510296	ASNS	-1.01301	0.311058	0.0868987	0.930752	-2.37811	0.0174016	0.39654	0.691707	-0.403132	0.686851	-0.712309	0.476273	0.711024	0.477069	-0.145448	0.884357	-0.876106	0.380973	-0.949816	0.342206
rs894756	1190546	RALBP1	3.14504	0.00166065	-2.63776	0.00834549	2.17238	0.0298268	-2.02347	0.0430246	0.199361	0.84198	2.04268	0.0410844	2.45849	0.0139523	-0.0441662	0.964772	1.70319	0.088532	4.66564	3.0766e-06
rs7249702	4250735	-	2.17854	0.0293655	-1.68034	0.092892	-0.458277	0.646754	0.610977	0.541215	0.0836231	0.933356	2.25259	0.0242848	0.644452	0.519282	0.632202	0.527255	-0.871445	0.383511	1.83726	0.066171
rs4962411	1410427	ZRANB1	-3.95381	7.69153e-05	-7.94818	1.89266e-15	4.88181	1.05118e-06	-4.43832	9.06655e-06	-7.29306	3.02995e-13	-7.52499	5.27257e-14	8.75535	2.03462e-18	-4.63224	3.61727e-06	1.27996	0.200559	0.358936	0.719643
rs11771331	1470195	MCM7	0.936533	0.348999	0.42352	0.671916	-0.467495	0.640146	-0.48907	0.624792	0.476563	0.633673	0.333282	0.738921	1.37285	0.169798	-0.348829	0.727218	1.94893	0.0513035	2.15871	0.0308726
rs904251	5690445	MDGA1	-0.104109	0.917083	-0.735605	0.461971	-0.293102	0.769444	-0.260995	0.794096	-1.14677	0.251477	-0.603489	0.546183	0.0514829	0.958941	-1.0278	0.304046	-0.649616	0.51594	-1.28578	0.198518
rs8138406	1740576	LMF2	-0.383465	0.701375	0.869976	0.384313	0.115299	0.908208	0.811224	0.417237	1.30348	0.192412	0.871524	0.383468	0.081372	0.935146	0.340466	0.733505	1.22357	0.221115	0.336663	0.736371
rs1521	1440603	-	2.03201	0.0421528	2.86134	0.00421849	-2.62918	0.00855898	1.42322	0.154673	2.84172	0.0044871	2.52393	0.0116051	-1.79717	0.072308	2.53782	0.0111546	-0.189885	0.849399	1.7488	0.0803251
rs11170800	5550458	RP11-834C11.3;RP11-834C11.7	-0.0701445	0.944079	1.30601	0.191548	-0.172591	0.862973	0.774524	0.438621	1.81086	0.0701628	0.592626	0.553431	0.299166	0.764813	1.00443	0.31517	0.496072	0.619844	1.39559	0.162839
rs260461	7160148	ZNF329	-0.941483	0.346457	2.45275	0.0141769	-1.22526	0.220477	1.31669	0.187943	1.6011	0.109354	-0.360707	0.718319	-1.93165	0.0534026	0.339137	0.734506	0.713927	0.475272	0.211677	0.832359
rs11648796	430392	MSLN;HAGHL	-1.04463	0.296193	1.08652	0.277247	-1.38582	0.165801	0.424385	0.671285	1.8071	0.070746	-0.805746	0.420389	-0.140654	0.888143	0.50487	0.61365	0.940171	0.34713	0.842333	0.399601
rs228654	5290538	PER3;UTS2	0.556854	0.577627	-0.505232	0.613396	1.13362	0.256954	-0.236743	0.812857	0.307	0.758844	1.28693	0.198119	0.406901	0.684081	-0.253338	0.800007	0.605719	0.544701	0.55023	0.582162
rs2896190	2900309	-	-0.696272	0.486259	0.724695	0.468639	0.119965	0.904511	2.45125	0.0142361	-0.716844	0.47347	-1.23859	0.215497	1.17341	0.240631	-1.8309	0.067116	-1.87054	0.0614093	-0.489858	0.624235
rs10514710	1710161	ZNF502	0.416069	0.67736	3.319	0.000903391	-3.5602	0.00037057	1.69773	0.0895585	4.98828	6.09196e-07	2.92128	0.00348602	0.508001	0.611452	0.225802	0.821355	3.47667	0.000507677	3.59166	0.000328578
rs10133301	4830372	ADSSL1	-1.65152	0.0986323	2.32429	0.0201099	-0.101719	0.918979	1.29413	0.19562	1.57098	0.116187	-0.965767	0.334161	-0.320513	0.74858	-1.49803	0.134124	1.13092	0.258087	0.509995	0.610055
rs3773729	6040196	PRKCD	0.44711	0.654795	3.02374	0.00249674	-1.33143	0.183049	2.46991	0.0135147	0.989372	0.322481	0.435931	0.662887	-1.57224	0.115896	1.13203	0.257621	-0.0742487	0.940812	0.200706	0.840928
rs4246511	6980398	NDUFS5	-0.640015	0.522163	0.356491	0.721473	-1.37751	0.168356	-0.283723	0.776623	-0.281753	0.778133	-0.566487	0.571063	0.013894	0.988915	0.68879	0.490955	-0.75466	0.450453	-0.851293	0.394606
rs2270460	7100386	RP11-566K11.7;TCF25	-2.63778	0.00834505	1.12976	0.258577	-0.70532	0.480611	0.43443	0.663976	0.726522	0.467519	-0.514745	0.606731	0.0979341	0.921985	0.771959	0.440139	0.343131	0.7315	0.162398	0.870993
rs7563788	3420050	MYT1L	-0.896098	0.3702	-0.0940535	0.925067	0.254859	0.798832	-0.54614	0.58497	0.289708	0.772039	-1.24767	0.212152	-0.411352	0.680814	-0.50435	0.614015	-0.313584	0.753837	-0.317664	0.75074
rs162982	3190598	TIAM2	-0.272458	0.78527	-0.77585	0.437837	0.892572	0.372086	-0.593061	0.553141	0.86774	0.385537	-0.714426	0.474964	1.12117	0.262214	-0.114604	0.908759	1.94278	0.0520423	0.862917	0.388183
rs1171207	3120091	CD300C	-0.937227	0.348642	-1.89902	0.0575616	1.50469	0.132403	-0.0877501	0.930075	-1.45056	0.146902	-1.9876	0.0468558	2.19785	0.02796	0.874949	0.381602	1.49703	0.134386	1.90418	0.0568864
rs2221894	160446	HMBOX1	-1.66816	0.0952844	-2.50085	0.0123896	1.10022	0.271236	-0.669873	0.502939	0.81433	0.415456	-1.46278	0.143528	8.98412	2.60807e-19	0.960303	0.336903	6.35883	2.03298e-10	6.05816	1.37687e-09
rs3736461	6180538	GDI2	-0.0042226	0.996631	-0.0788914	0.937119	-1.77455	0.0759724	-0.277522	0.781379	1.14911	0.250512	0.00248935	0.998014	2.30933	0.0209252	1.01018	0.31241	3.12044	0.00180582	0.42531	0.670611
rs6465554	6380450	SHFM1	-0.372435	0.709569	-0.320528	0.748568	1.42854	0.153136	-0.233982	0.814999	-0.573532	0.566285	0.126332	0.899469	-0.433467	0.664675	-0.074986	0.940226	-0.692915	0.488363	0.528599	0.597084
rs12526186	3780181	FLOT1	2.49733	0.0125134	-0.793404	0.427542	0.370848	0.710751	0.175843	0.860418	0.957364	0.338384	1.20362	0.228735	1.32894	0.183867	1.23897	0.215357	0.955475	0.339337	2.54017	0.0110799
rs386000	3940270	LILRA5	1.10029	0.271206	-2.47781	0.0132192	2.35309	0.0186179	-2.1855	0.0288522	-0.533258	0.593855	-0.047815	0.961864	1.43299	0.15186	-0.223731	0.822967	0.31117	0.755671	0.172069	0.863384
rs3095254	1440603	-	2.22083	0.0263627	1.45693	0.145135	-1.52124	0.128198	0.361119	0.718011	2.73906	0.00616153	2.99543	0.00274059	-0.544146	0.586341	2.96165	0.00305991	-0.342376	0.732068	1.52383	0.127552
rs4804788	1170196	CLEC4G	-0.468714	0.639274	-0.254239	0.799311	1.02465	0.30553	0.689226	0.490681	-0.187655	0.851147	-0.191607	0.84805	-0.154499	0.877217	1.28859	0.197541	-1.49562	0.134752	0.282707	0.777402
rs11045982	2070114	CLEC4D	3.13522	0.00171723	-0.230564	0.817654	-0.164056	0.869687	-0.508364	0.611198	1.86358	0.0623801	2.52984	0.0114115	0.939412	0.347519	0.868607	0.385062	1.17826	0.238694	3.02877	0.00245554
rs260461	6520280	ZNF135;ZSCAN18	-0.742615	0.457715	1.1234	0.261266	-1.21195	0.225531	0.602201	0.54704	0.655491	0.512152	-1.17512	0.239945	-0.9884	0.322957	-0.607288	0.54366	0.519114	0.603681	-0.878403	0.379725
rs3800989	7560452	RP5-894A10.2;AGK	-0.598685	0.549383	0.922189	0.35643	-0.302076	0.762594	0.427166	0.669258	1.5493	0.121311	-0.25021	0.802425	0.0399377	0.968143	0.957451	0.33834	1.17612	0.239548	0.0823035	0.934405
rs1321535	1010328	RP3-510L9.1;NEDD9	0.190007	0.849304	0.268688	0.78817	0.126652	0.899216	1.35628	0.175011	0.222088	0.824246	0.0137661	0.989017	0.312712	0.7545	1.50686	0.131848	0.115085	0.908378	0.0831241	0.933753
rs238135	3140369	TGIF1	3.91581	9.00995e-05	0.227473	0.820056	0.163231	0.870337	0.47963	0.63149	3.94486	7.98458e-05	3.38979	0.000699469	0.844321	0.39849	1.88267	0.0597447	3.51383	0.000441694	5.60745	2.05329e-08
rs2779116	4060075	SPTA1	-1.3863	0.165654	-0.42235	0.67277	-0.00578429	0.995385	-0.665294	0.505863	0.83443	0.404038	0.359753	0.719032	0.305992	0.759611	0.661593	0.508232	0.459553	0.645837	0.191501	0.848133
rs6834314	1450646	HSD17B13	-0.952606	0.34079	-0.583158	0.559787	1.52565	0.127097	-0.659377	0.509654	0.532966	0.594057	-1.72635	0.0842848	2.45741	0.0139943	0.706985	0.479576	2.02945	0.0424123	0.64468	0.519135
rs1554999	3440754	IL32	0.794325	0.427006	2.80715	0.0049982	-1.19828	0.230808	1.80283	0.0714148	2.30321	0.0212673	1.8064	0.0708558	0.0399516	0.968132	0.0871447	0.930556	2.19444	0.0282035	2.37149	0.0177165
rs10416967	6520026	NUCB1	1.87199	0.0612081	-0.532493	0.594384	-1.78274	0.0746285	-0.626238	0.531159	0.775063	0.438302	0.268012	0.78869	1.63694	0.101644	1.05211	0.292751	1.24914	0.211616	1.29748	0.194468
rs3807375	5720682	TMEM176A	-0.813801	0.415759	0.0563544	0.95506	-0.556765	0.577688	-0.0705602	0.943748	-0.0105838	0.991556	-0.250072	0.802532	0.637226	0.523978	0.0485526	0.961276	0.461928	0.644133	0.641472	0.521216
rs10798068	1820632	PTGS2	0.357466	0.720743	0.586802	0.557337	0.794459	0.426928	-0.804838	0.420913	0.676817	0.498522	0.469864	0.638452	0.724213	0.468935	0.302715	0.762107	1.82341	0.0682411	1.73188	0.0832949
rs6465825	4480368	TMEM60	-1.39151	0.16407	0.902383	0.366853	-0.177197	0.859354	1.69494	0.090086	0.764236	0.444727	-0.434516	0.663914	1.06959	0.284805	0.143335	0.886026	0.83167	0.405595	0.417024	0.676661
rs3136594	870202	TNFSF10	0.642344	0.52065	0.541902	0.587886	-0.156575	0.87558	-0.118461	0.905702	-0.840262	0.400762	0.177346	0.859236	-0.665371	0.505813	-0.371515	0.710254	-1.14464	0.252358	-0.67665	0.498628
rs131788	1740576	LMF2	-2.11156	0.0347239	-0.00224499	0.998209	0.0847822	0.932435	0.662994	0.507334	-0.660458	0.50896	-0.759489	0.44756	0.307681	0.758325	0.871764	0.383337	-0.0118103	0.990577	-2.19013	0.0285147
rs10110562	1430156	PLEKHA2	2.12831	0.0333113	0.995165	0.319656	-0.547524	0.584019	0.0410297	0.967272	0.710918	0.477135	1.7521	0.0797571	-0.119397	0.904961	2.85651	0.00428327	0.117563	0.906414	1.51662	0.129363
rs1172822	2000110	BRSK1;CTD-2105E13.14	0.733569	0.463212	1.09981	0.271413	-1.62748	0.103635	0.72897	0.46602	1.99975	0.0455274	1.52604	0.127	-1.62764	0.103602	0.435853	0.662943	-0.129157	0.897233	0.431936	0.665788
rs1324551	6480059	RP11-399O19.5;STAMBPL1;ACTA2	2.32491	0.0200767	-0.240725	0.809768	-1.69449	0.0901731	0.776861	0.437241	0.680986	0.495881	-0.898855	0.36873	-1.83762	0.0661185	-2.81492	0.00487896	-1.21432	0.224627	-4.21281	2.52209e-05
rs3791337	4730131	PSD4	1.80013	0.0718395	1.1946	0.232245	-1.00934	0.31281	1.08563	0.277642	1.41559	0.156894	2.28444	0.0223456	0.93956	0.347443	0.442079	0.658432	0.246783	0.805077	1.32653	0.184665
rs1732115	5910026	UVSSA	0.739103	0.459844	-2.49327	0.0126572	2.77235	0.00556525	-0.383059	0.701676	-1.02656	0.304626	-0.714721	0.474781	4.42422	9.67901e-06	1.48936	0.136394	2.41009	0.0159486	3.51224	0.000444344
rs2606757	5220491	ATG7;VGLL4	-0.418133	0.67585	-0.0917797	0.926873	-0.828944	0.407136	-0.0309206	0.975333	1.64519	0.0999303	-0.233594	0.8153	-1.37379	0.169507	-0.203041	0.839103	0.724915	0.468504	0.2883	0.773117
rs3761959	1660465	FCRL5	-0.696401	0.486177	-0.230787	0.81748	-0.0723484	0.942325	0.303224	0.761719	-2.16568	0.030336	-1.05039	0.29354	-1.95363	0.0507452	-1.26444	0.206072	-1.96727	0.0491521	-2.8992	0.0037412
rs7442295	3930546	SLC2A9	0.854123	0.393037	0.927047	0.353902	-0.285254	0.775449	-0.739831	0.459403	0.19106	0.848479	0.933552	0.350535	-1.11398	0.265286	-0.22515	0.821863	-0.868207	0.385281	0.0824595	0.934281
rs4970988	4540288	C1orf56;CDC42SE1	0.718897	0.472204	0.703912	0.481487	0.957893	0.338117	0.569097	0.56929	2.71627	0.00660227	1.47189	0.14105	-0.643685	0.51978	0.245075	0.806398	0.379453	0.704351	2.75829	0.00581043
rs12713852	2680541	MRPL19;GCFC2	-0.179134	0.857833	-0.00759057	0.993944	1.10764	0.268019	1.64431	0.100113	0.0798464	0.936359	-0.659962	0.509278	0.372818	0.709284	-0.992728	0.320843	-0.249315	0.803117	0.229617	0.818389
rs9635366	1500446	DPP8	0.64684	0.517735	-0.240813	0.8097	-0.0312538	0.975067	0.535291	0.592448	0.309186	0.75718	0.466282	0.641013	-0.461223	0.644639	1.30894	0.190555	-0.89394	0.371354	1.22257	0.221492
rs9272535	1940180	PSMB9	0.159214	0.8735	0.337711	0.735581	-0.276695	0.782014	-0.538916	0.589945	1.77836	0.0753441	1.57077	0.116237	1.54105	0.123305	1.37641	0.168693	2.95714	0.00310503	1.43542	0.151167
rs3130617	6380717	HSPA1A	-0.129965	0.896594	-0.664834	0.506157	1.51146	0.130673	-1.23775	0.215807	0.145636	0.884209	-0.0106626	0.991493	0.610668	0.541419	-1.60388	0.108741	1.53252	0.125393	0.173273	0.862437
rs548181	2570692	STT3A	0.653744	0.513277	0.7544	0.450609	0.480534	0.630848	1.54014	0.123527	0.257998	0.796408	1.08906	0.276128	-2.66612	0.00767325	0.452667	0.650788	-2.10074	0.0356635	-1.57828	0.114501
rs4814623	2370364	BFSP1	-0.474803	0.634927	1.31328	0.189089	-0.85703	0.391428	0.919097	0.358045	1.42198	0.155031	-0.846215	0.397433	-0.00222302	0.998226	-0.383752	0.701162	0.165587	0.868482	0.357946	0.720384
rs6124684	2710465	SEMG1	0.242956	0.808039	0.366127	0.71427	-1.01524	0.309994	-0.274732	0.783522	0.668762	0.503647	0.361547	0.71769	0.798938	0.424326	1.67329	0.0942703	0.768593	0.442135	0.0985711	0.921479
rs11595680	3370273	SGPL1	1.64436	0.100103	1.38191	0.166998	-0.696463	0.486139	0.442303	0.65827	2.61812	0.00884148	2.16371	0.0304864	1.18897	0.23445	2.08597	0.0369812	2.76254	0.00573539	3.37431	0.000740015
rs6505781	1580286	RP11-773H22.4;SEH1L	-0.0871733	0.930534	-1.31109	0.189828	0.332045	0.739855	0.839304	0.401299	-0.384338	0.700728	-1.00035	0.317143	-0.24314	0.807897	-1.30415	0.192183	0.10482	0.916519	-0.491253	0.623248
rs13010639	3840593	SP110	-0.762559	0.445727	2.30147	0.0213648	-1.7596	0.0784764	1.22122	0.222002	1.25034	0.211176	-0.0140273	0.988808	-2.2039	0.0275315	0.55466	0.579127	-1.26527	0.205774	-0.483394	0.628816
rs1063964	2900626	SRI	1.93332	0.0531963	9.69057	3.30667e-22	-5.74319	9.29097e-09	7.13505	9.67504e-13	11.645	2.43263e-31	7.26892	3.62364e-13	-6.43134	1.26482e-10	3.12708	0.00176555	0.816297	0.41433	2.7067	0.0067955
rs1166698	2750187	NEXN	0.258032	0.796382	0.0981989	0.921774	-0.407491	0.683648	0.0960633	0.92347	0.689147	0.490731	0.541819	0.587943	2.5489	0.0108063	1.07592	0.281964	2.96942	0.00298361	1.16069	0.245767
rs2259816	50414	HNF1A;C12orf43	1.08974	0.275826	0.114772	0.908626	0.255712	0.798174	0.655219	0.512327	0.755749	0.4498	1.14274	0.253145	1.54091	0.12334	1.12173	0.261978	2.32819	0.019902	2.17984	0.029269
rs888788	1070474	POC5	0.68481	0.493464	0.905509	0.365196	-0.551053	0.581598	2.30178	0.0213478	2.69653	0.00700662	1.85613	0.0634353	1.41261	0.157769	0.464799	0.642076	3.0581	0.00222748	1.74459	0.0810568
rs1048326	510551	RP11-505E24.2;LRRK1	-0.0469817	0.962528	-0.0495781	0.960459	-1.04427	0.296359	-0.231748	0.816734	1.34766	0.177768	-0.0650227	0.948156	0.698873	0.484632	1.48148	0.138479	0.771362	0.440493	0.981085	0.326551
rs17300022	7150465	AMZ1;GNA12	3.41681	0.000633587	-1.3232	0.185769	4.22551	2.38396e-05	-1.20884	0.226724	-1.04245	0.297203	1.85401	0.0637378	0.62668	0.530869	1.31257	0.189326	-0.591181	0.554399	3.87899	0.000104891
rs2902544	4280561	ACTR1A	0.167459	0.867009	-1.12594	0.260191	1.41141	0.158125	-1.74638	0.0807441	-0.777391	0.436928	0.208605	0.834756	-0.564867	0.572164	0.486841	0.626371	-1.04277	0.297053	1.18542	0.235853
rs4970988	4480192	C1orf56;CDC42SE1	0.0877124	0.930105	-0.0819198	0.93471	1.14898	0.250564	0.126932	0.898994	1.43963	0.149973	0.0189997	0.984841	-0.135121	0.892516	0.377724	0.705636	0.354095	0.723268	2.07705	0.0377973
rs4609139	7510551	CPED1	1.66836	0.095245	-0.121335	0.903425	-1.46581	0.142699	1.87373	0.0609682	2.14389	0.0320416	1.48146	0.138483	0.268289	0.788477	0.381138	0.703101	1.6689	0.0951367	1.10284	0.270099
rs6586030	5960168	FAM213A	-0.696782	0.485939	1.03693	0.299768	-0.679082	0.497086	0.474033	0.635476	1.16369	0.24455	0.127317	0.898689	0.512949	0.607987	0.597897	0.549909	0.265788	0.790402	1.18837	0.234687
rs1084004	3800463	-	-0.186586	0.851986	-0.263661	0.792041	-0.297647	0.765973	-1.0805	0.279919	-1.40283	0.160668	-0.384213	0.70082	0.0419518	0.966537	-1.41967	0.155704	0.0548744	0.956239	-0.0499125	0.960192
rs7290980	3870408	SLC35E4;DUSP18	3.60364	0.000313794	-1.56393	0.117834	1.3964	0.162594	0.17092	0.864287	0.0849153	0.932329	2.23146	0.0256505	2.52345	0.011621	1.0029	0.31591	1.86481	0.062208	3.29411	0.000987329
rs2523608	1260538	ATP6V1G2-DDX39B;ATP6V1G2	0.37198	0.709907	1.26586	0.205564	-0.533223	0.593879	-0.531595	0.595007	1.78197	0.0747537	0.655145	0.512374	0.490789	0.623576	-0.172757	0.862842	1.8512	0.0641403	0.788424	0.430449
rs9392454	5560086	RIPK1	1.0249	0.305411	-0.207766	0.835412	-0.852182	0.394113	-1.02134	0.307092	0.256715	0.797399	0.321937	0.747501	0.927627	0.353601	0.645271	0.518752	1.1177	0.263697	1.5534	0.120328
rs11642384	6110280	AMDHD2;CEMP1	-2.03988	0.041362	0.985957	0.324154	-0.371146	0.710529	1.76495	0.0775718	-1.32917	0.183793	-1.77384	0.0760902	1.5179	0.12904	-0.0896716	0.928548	0.667755	0.50429	-1.10882	0.267506
rs7861020	6420278	ENTPD2	1.0567	0.290649	0.989735	0.322304	-1.14526	0.252103	0.514554	0.606864	0.530312	0.595896	0.83517	0.403622	-0.962679	0.335708	-0.482259	0.629622	0.0315709	0.974814	0.809292	0.418347
rs7520996	1500768	SSU72	-0.149687	0.881011	1.03201	0.302067	-0.302874	0.761986	1.97309	0.0484854	1.35418	0.175678	0.694125	0.487604	-1.35981	0.173891	1.03058	0.302738	-0.64688	0.51771	1.29535	0.195198
rs11150614	4490500	ITGAX	1.69979	0.0891697	0.749714	0.453427	-0.387264	0.698561	2.43497	0.0148928	2.43003	0.0150975	2.10237	0.0355205	0.0181827	0.985493	3.11427	0.00184398	0.257858	0.796516	4.25095	2.12867e-05
rs2789369	1260520	GGPS1	1.62602	0.103946	-1.48864	0.136583	0.185423	0.852897	-1.37794	0.168222	-0.719501	0.471833	0.0590918	0.952879	1.48023	0.138811	0.334121	0.738288	0.266945	0.789512	1.15507	0.248062
rs10514609	3390022	COX4I1	-0.520327	0.602836	-0.55984	0.575588	0.932606	0.351024	-0.0724428	0.942249	0.883414	0.377012	-0.385422	0.699925	1.25322	0.210127	-0.100177	0.920204	1.39635	0.162609	1.30748	0.19105
rs372883	150315	C21orf7	-0.440895	0.659289	-0.523417	0.600684	1.38606	0.165729	0.845625	0.397762	0.112023	0.910805	0.658046	0.510508	0.377902	0.705503	-1.11781	0.263648	-1.2381	0.215679	0.744091	0.456822
rs7869457	2810059	KLF4	-1.88885	0.0589125	1.47169	0.141104	-3.12359	0.0017866	1.60723	0.108004	1.07891	0.280627	-0.750192	0.453139	0.759808	0.447369	0.967423	0.333333	1.51424	0.129965	-0.113482	0.909649
rs4845604	6100010	THEM4	-0.759799	0.447375	2.23779	0.0252347	-1.1211	0.262246	1.87756	0.060442	1.06318	0.287702	0.504489	0.613918	-0.6342	0.52595	0.274185	0.783943	-0.230605	0.817622	-0.163964	0.86976
rs210138	1030427	CUTA	-0.420509	0.674114	1.46785	0.142145	-0.959644	0.337234	1.46515	0.142881	0.530097	0.596045	0.31502	0.752746	-0.644879	0.519006	0.307994	0.758087	-1.21198	0.225519	0.943929	0.345206
rs7127900	770575	TSPAN32	0.569753	0.568845	0.3692	0.711979	-0.910459	0.36258	1.13966	0.254427	0.824655	0.409567	1.12038	0.262553	-0.730485	0.465094	-0.258105	0.796326	-0.191818	0.847885	0.737918	0.460564
rs11237081	6760661	CAPN5	-2.08867	0.0367373	-1.21586	0.224039	1.68838	0.0913385	-1.734	0.0829184	-3.3391	0.000840516	-1.71577	0.086205	0.348353	0.727575	-1.40449	0.160173	-1.12776	0.259422	-1.34036	0.180129
rs3819578	60221	RFXANK	-0.664311	0.506491	-0.289273	0.772373	0.652537	0.514055	-0.550558	0.581936	0.112927	0.910089	-1.51459	0.129878	1.81098	0.0701432	-0.350501	0.725963	1.61211	0.106938	-0.23665	0.812928
rs4713646	6180133	ITPR3	1.27884	0.200955	-0.236153	0.813314	-0.806622	0.419884	-1.43287	0.151896	0.152403	0.878869	0.601245	0.547677	0.131056	0.895731	1.0261	0.304844	-0.803913	0.421447	0.671563	0.501862
rs11734	4760112	PTCD1;ATP5J2-PTCD1;ATP5J2	1.92272	0.054515	-0.449933	0.652759	-0.501616	0.615938	-1.66346	0.0962199	-0.619846	0.535359	2.45751	0.0139905	-1.5037	0.132658	1.15688	0.24732	-1.5152	0.129721	-0.655946	0.511859
rs9822268	4200367	FAM212A	0.243172	0.807872	0.0387118	0.96912	-0.00599523	0.995217	0.878165	0.379854	0.374677	0.7079	1.11408	0.265245	0.0978908	0.922019	0.589433	0.555571	0.801273	0.422973	1.32312	0.185796
rs8071251	7050735	MSX2P1	-0.532698	0.594243	0.6895	0.490508	-0.54297	0.587151	0.793702	0.427369	-0.75441	0.450603	-0.551689	0.581161	0.581768	0.560723	-0.369299	0.711905	-0.396539	0.691708	-0.296635	0.766745
rs1819333	2850100	RP11-514O12.4;RNASET2	6.38256	1.74149e-10	-0.85073	0.39492	2.27548	0.0228773	0.805951	0.420271	3.43935	0.000583111	5.34398	9.09255e-08	3.32588	0.000881402	3.41511	0.000637559	3.07848	0.00208061	8.32759	8.25039e-17
rs2075788	6280601	SNORD52;SNORD48;C6orf48	-0.0620811	0.950498	2.17032	0.0299823	-0.123065	0.902056	1.6072	0.10801	1.18005	0.237981	-0.211423	0.832557	-0.962454	0.335821	-0.216249	0.828793	0.276951	0.781818	-0.581376	0.560987
rs2804919	1580224	SIRT5	-0.461065	0.644752	-0.89701	0.369714	0.128808	0.89751	-1.13286	0.257275	-0.612913	0.539934	-0.0460816	0.963245	2.01179	0.0442418	-1.28287	0.199538	1.1972	0.231228	-0.154932	0.876875
rs2413054	7560576	DRG1	0.601393	0.547578	-0.359339	0.719341	0.458027	0.646933	-0.285664	0.775136	0.354461	0.722994	0.651047	0.515016	-1.38931	0.164738	0.941388	0.346506	0.091924	0.926758	1.04816	0.294564
rs204993	7200369	RNF5;AGER	0.319817	0.749107	-1.13073	0.258169	1.15619	0.247602	-1.50005	0.133602	-1.23415	0.217146	0.310227	0.756388	0.529501	0.596458	0.343142	0.731492	-0.64346	0.519926	0.419563	0.674804
rs2240506	2640608	WNT5B;FBXL14	0.298277	0.765491	-0.584933	0.558593	0.566686	0.570928	-0.948001	0.343129	-1.00788	0.31351	-0.185819	0.852587	0.437454	0.661782	-0.747994	0.454464	0.025709	0.979489	0.334134	0.738278
rs11074852	3890040	-	-0.637083	0.524071	0.300835	0.76354	-0.549082	0.582949	0.318234	0.750307	-1.26761	0.204939	-0.867639	0.385592	-0.122136	0.902791	0.238323	0.811631	-0.354464	0.722991	-0.440562	0.65953
rs11122197	4040242	FAM89A	-0.946503	0.343892	0.938802	0.347832	0.278798	0.7804	0.782384	0.433989	1.81129	0.0700962	0.185963	0.852474	0.613941	0.539254	0.650433	0.515413	0.827131	0.408163	1.91213	0.0558599
rs4696069	1780673	SAP30	2.04849	0.0405118	-1.12845	0.259132	1.21874	0.222943	-0.351526	0.725194	-0.751746	0.452204	0.335902	0.736945	0.646511	0.517948	0.923166	0.35592	-0.559208	0.57602	0.943192	0.345583
rs9616769	5490014	ZBED4	1.28761	0.19788	-1.31438	0.18872	2.23137	0.0256565	-2.37762	0.017425	-0.754861	0.450333	1.17053	0.241786	-1.78265	0.0746441	0.785835	0.431964	0.0498066	0.960276	2.21527	0.0267412
rs600550	520360	MS4A6A	0.0310133	0.975259	-0.248955	0.803396	0.126371	0.899438	0.301118	0.763325	-0.340856	0.733212	-0.935784	0.349385	0.50205	0.615632	0.559866	0.575571	0.109512	0.912797	-1.15277	0.249003
rs4970988	1430278	CTSK	1.85764	0.0632203	1.22881	0.219143	-1.8242	0.0681217	0.908387	0.363674	1.73226	0.0832268	1.54219	0.123028	-1.56683	0.117155	2.06487	0.0389356	-0.722885	0.46975	1.47588	0.139976
rs2127516	6130538	ANKUB1;PFN2	-1.05032	0.29357	2.0071	0.0447395	-1.17121	0.241514	1.41879	0.155961	2.1176	0.0342089	-0.625587	0.531586	1.08531	0.277786	-0.557576	0.577134	2.20016	0.0277953	0.350096	0.726267
rs9646303	2710402	ZCCHC14	0.128529	0.89773	0.685238	0.493194	-0.5287	0.597013	-0.021798	0.982609	-0.244302	0.806997	0.399204	0.689743	-0.441114	0.65913	-0.946176	0.344059	-1.2096	0.226432	-0.350516	0.725951
rs11581211	2030360	FAM159A	-1.39254	0.16376	0.059923	0.952217	-0.0463573	0.963025	1.09196	0.27485	-1.92316	0.0544599	-2.63199	0.00848867	1.02025	0.30761	-0.816987	0.413936	-0.314095	0.753449	-0.465929	0.641266
rs11113894	1440064	CMKLR1	-0.429129	0.667829	-1.05457	0.291622	1.25028	0.211197	0.100022	0.920327	0.24642	0.805357	-0.926322	0.354279	1.63158	0.102767	-1.74532	0.0809293	1.05175	0.292915	-0.518804	0.603897
rs1937332	6480059	RP11-399O19.5;STAMBPL1;ACTA2	0.186389	0.85214	0.960233	0.336938	-0.438318	0.661156	0.630186	0.528573	2.03742	0.0416075	1.43523	0.151223	-0.311591	0.755352	1.28217	0.199781	1.41761	0.156304	1.34563	0.178421
rs10761552	6580368	ANK3	0.128103	0.898068	1.93456	0.0530447	-0.148789	0.88172	2.07434	0.0380474	0.793577	0.427442	1.33419	0.182142	1.53588	0.124568	0.968075	0.333007	0.625426	0.531692	1.67588	0.0937609
rs17409513	3120402	SLC30A7	0.0330621	0.973625	3.07218	0.00212501	-2.62643	0.00862858	1.80568	0.0709677	1.72401	0.0847058	1.28304	0.199477	-1.45126	0.146707	1.46204	0.143731	-1.26898	0.204447	0.141689	0.887326
rs217372	7380653	DDX56	0.149401	0.881238	-0.994247	0.320102	1.31557	0.188319	-0.801092	0.423079	-0.690607	0.489813	-0.574112	0.565892	-0.0522517	0.958328	0.70417	0.481327	-0.749754	0.453403	-0.0317883	0.974641
rs17734799	3390201	CLEC9A	1.64427	0.100121	-0.00424539	0.996613	-1.09597	0.273091	-0.319993	0.748974	3.15256	0.00161846	2.21858	0.0265154	0.0225492	0.98201	1.25899	0.208033	1.81636	0.069315	2.3445	0.0190527
rs2244012	6040398	AC034220.3;SLC22A4	-0.325887	0.74451	-0.896521	0.369974	0.293363	0.769245	-0.519172	0.603641	-1.4092	0.158777	-1.49456	0.135028	-1.10415	0.26953	-0.422686	0.672524	-0.72745	0.466951	-1.6437	0.100239
rs4771122	6370484	POLR1D	0.0158722	0.987336	0.761458	0.446383	-1.41213	0.157911	0.409946	0.681846	-0.0126533	0.989904	-0.117398	0.906545	0.23053	0.81768	1.24542	0.212976	-0.326394	0.744127	0.191036	0.848498
rs10749291	3060121	SFXN4	-0.232603	0.81607	1.4768	0.139729	-1.35641	0.17497	0.7725	0.439818	1.12287	0.261495	0.305929	0.759659	0.610733	0.541377	0.73645	0.461457	0.417287	0.676469	0.954614	0.339773
rs5756506	2230288	TST	-0.390578	0.696109	-1.31172	0.189613	0.511019	0.609338	-0.0826332	0.934143	-1.73581	0.0825976	-1.65535	0.097854	0.392185	0.694921	-0.747862	0.454543	-0.500121	0.61699	-0.9542	0.339982
rs10845103	3390594	KLRD1	-1.06285	0.287849	1.96128	0.0498468	-0.249439	0.803021	1.62671	0.103798	2.61385	0.00895288	1.45628	0.145316	1.66543	0.0958271	1.93266	0.0532787	3.47018	0.000520115	3.33517	0.000852468
rs1165205	3930377	TRIM38	0.0984969	0.921538	0.0652498	0.947975	-0.121023	0.903672	0.0410598	0.967248	0.567875	0.57012	0.00783198	0.993751	-1.09977	0.27143	0.775799	0.437868	-0.520205	0.602921	-0.472494	0.636574
rs17097780	2470279	ACADM	-1.3496	0.177145	0.95405	0.340058	-0.454254	0.649646	1.3147	0.188611	1.55606	0.119694	0.607951	0.54322	2.06413	0.0390055	-0.308254	0.757889	1.93504	0.052986	1.5626	0.118146
rs4963120	10592	EFCAB4A;AP006621.8	-0.745222	0.456138	-1.66549	0.0958157	-1.93853	0.0525591	-0.368481	0.712515	-1.08275	0.278921	-0.928979	0.3529	0.83779	0.402149	-1.74234	0.0814498	-0.742812	0.457596	-1.36323	0.172811
rs17142067	2230241	F13A1	-1.29571	0.195074	0.301024	0.763396	-0.518228	0.604299	-0.261715	0.793541	0.325829	0.744554	-1.17586	0.23965	0.750637	0.452871	0.149233	0.88137	0.840755	0.400485	-0.652411	0.514136
rs479844	2000224	FAM89B	-1.41377	0.157429	-1.17543	0.239822	-0.596922	0.55056	-0.0635063	0.949363	-1.10464	0.269317	-2.24926	0.0244961	0.509025	0.610734	-1.04363	0.296657	0.016697	0.986678	-2.05236	0.0401351
rs4804519	1450075	ILF3	-0.43174	0.66593	-0.352134	0.724738	-0.233262	0.815558	0.028363	0.977373	-0.30754	0.758432	-0.300807	0.763562	1.2302	0.218623	-0.154407	0.877289	0.456045	0.648358	-0.107336	0.914523
rs13298082	6330368	ODF2	-1.16084	0.245708	0.367403	0.713318	1.01989	0.307779	1.56341	0.117956	-0.630788	0.528179	-2.31354	0.0206931	0.584254	0.559049	-0.864822	0.387137	-0.213836	0.830675	-1.45149	0.146645
rs583397	1260551	AP000487.5;PPFIA1	0.96632	0.333884	2.80171	0.00508332	-1.45817	0.144793	0.625455	0.531672	1.96853	0.049007	1.94917	0.0512757	-1.65257	0.0984181	-0.51228	0.608455	0.897876	0.369252	1.31585	0.188225
rs2930047	2710491	DAP	-1.54145	0.123208	0.858534	0.390598	-2.13293	0.0329303	1.44626	0.148104	1.51309	0.130256	-0.661662	0.508188	1.38761	0.165255	-0.234041	0.814953	1.2957	0.195079	-0.0268994	0.97854
rs4236601	2630577	CAV2	-0.433588	0.664588	0.335859	0.736977	-0.651619	0.514647	-1.6006	0.109466	0.774584	0.438585	0.122724	0.902326	0.535355	0.592405	-0.414732	0.678338	0.552191	0.580817	1.04494	0.29605
rs4809324	6420450	ZGPAT;LIME1;SLC2A4RG	0.751494	0.452356	1.3443	0.178853	-0.53686	0.591364	0.384329	0.700735	2.40508	0.0161689	2.45957	0.0139103	-0.783356	0.433418	1.87216	0.0611851	0.530507	0.59576	2.23982	0.0251026
rs9211	4890743	IQSEC1	-1.62646	0.103853	-0.256564	0.797516	-0.836081	0.403109	-0.215524	0.829359	-1.2376	0.215865	-1.05171	0.292934	2.10182	0.0355686	0.688618	0.491063	0.910019	0.362812	-1.18848	0.234643
rs2017733	520215	TMEM189-UBE2V1;UBE2V1;TMEM189	-0.604718	0.545366	-1.32849	0.184015	2.25834	0.0239247	-1.1291	0.258858	-0.347477	0.728233	-0.969447	0.332322	1.52518	0.127215	-1.7394	0.0819636	0.64673	0.517807	-0.334388	0.738087
rs1516085	5390372	COA5	1.42867	0.153098	0.161483	0.871713	-0.888965	0.374022	0.311837	0.755164	0.51946	0.60344	0.723326	0.46948	0.821382	0.411429	-0.0649885	0.948183	0.710974	0.477101	0.883222	0.377116
rs2252521	1400703	CPVL	1.00847	0.313231	0.570272	0.568493	-0.066533	0.946953	0.971398	0.33135	-0.135209	0.892447	0.576595	0.564213	-2.52885	0.0114438	0.774291	0.438759	-3.99664	6.42485e-05	-0.311254	0.755608
rs11764594	3940615	PUS7	-0.372781	0.709312	3.32556	0.000882405	-1.48802	0.136744	0.781806	0.434328	2.56852	0.0102133	0.728393	0.466373	-1.21431	0.224629	-0.776447	0.437485	0.396522	0.69172	1.83054	0.0671698
rs1172199	1340746	SLC45A3	0.106141	0.91547	-1.37107	0.170354	1.43554	0.151133	-2.21914	0.0264775	-0.906642	0.364596	-0.301472	0.763054	-0.228226	0.819471	-0.453614	0.650106	-0.135863	0.891929	0.48157	0.630111
rs12982518	830152	FCER2	-1.02624	0.304779	0.637923	0.523524	-1.38358	0.166488	2.75811	0.00581375	1.67532	0.0938716	-1.06862	0.285243	1.52344	0.127647	-0.702521	0.482354	2.51107	0.0120364	1.06259	0.287967
rs158763	2940685	C1QA	-0.553491	0.579927	0.751333	0.452452	-0.550345	0.582083	-0.072213	0.942432	-0.732451	0.463894	-0.417386	0.676396	-2.48466	0.0129675	0.630825	0.528155	-1.70225	0.0887093	-2.64186	0.00824517
rs3924892	290333	C14orf79;CDCA4	-0.230201	0.817936	1.2554	0.209335	0.380967	0.703228	-0.233229	0.815584	0.943328	0.345513	0.446464	0.655262	-0.553599	0.579853	0.783523	0.43332	-0.15211	0.8791	0.513065	0.607906
rs8010409	1850523	RP11-104E19.1;GZMB	1.46001	0.144286	2.49614	0.0125552	-1.49141	0.135853	2.90768	0.00364124	0.867032	0.385925	1.53204	0.125511	-3.27103	0.00107155	1.61377	0.106577	-2.96201	0.00305637	0.0368386	0.970614
rs11777259	7650066	RP11-624C23.1	-0.0200664	0.98399	-0.51122	0.609197	0.963471	0.335311	-0.173711	0.862093	-1.22997	0.21871	-0.388515	0.697635	-0.925505	0.354703	-0.0291006	0.976784	-0.499405	0.617494	0.443818	0.657174
rs736408	3710343	ITIH4	-2.87892	0.00399044	-1.50111	0.133327	0.491633	0.622979	-0.199594	0.841798	-3.42635	0.000611757	-4.14341	3.42175e-05	1.71525	0.0862989	-1.30318	0.192515	-1.07528	0.282249	-1.19681	0.23138
rs11650975	830132	PHOSPHO1	-0.0262833	0.979031	-0.302436	0.76232	2.94327	0.00324763	0.0375492	0.970047	-0.895319	0.370617	-0.0562077	0.955176	-0.953441	0.340367	-0.495192	0.620464	-0.192435	0.847402	0.936718	0.348903
rs1131709	3180189	ZNF271	-1.11221	0.266049	-0.689058	0.490787	1.45832	0.144751	-1.78863	0.0736742	-0.694494	0.487372	1.2143	0.224635	-0.800549	0.423393	0.45532	0.648879	-0.880973	0.378332	0.22581	0.821349
rs4702982	4230017	-	1.85606	0.0634454	0.510525	0.609684	-0.901346	0.367404	0.710756	0.477236	3.98434	6.76688e-05	2.91601	0.00354544	2.64745	0.0081102	1.88659	0.0592152	3.45605	0.000548161	2.72264	0.00647626
rs2251746	50192	DARC	1.04573	0.295685	0.335983	0.736884	2.91904	0.00351115	0.113896	0.90932	0.903171	0.366435	1.50007	0.133597	0.673102	0.500882	0.252816	0.800411	1.40536	0.159914	2.31474	0.020627
rs6938061	5690445	MDGA1	-4.15967	3.18703e-05	-2.43904	0.0147263	0.0513617	0.959037	-0.750569	0.452912	-2.62651	0.00862658	-3.96853	7.23181e-05	1.38575	0.165824	-1.9641	0.0495183	-0.547016	0.584368	-2.89901	0.00374339
rs10883958	990372	COL17A1	0.226302	0.820966	1.60512	0.108467	-0.497041	0.61916	2.83114	0.00463827	1.48561	0.137382	0.581788	0.56071	-0.646595	0.517894	-1.77021	0.0766918	0.505062	0.613515	0.759153	0.447761
rs1058588	5910128	VAMP8	3.1445	0.00166369	1.33362	0.182329	0.797577	0.425116	0.916684	0.359308	6.0487	1.46015e-09	4.46931	7.84709e-06	3.43082	0.00060175	5.05693	4.26068e-07	4.64005	3.48326e-06	6.80626	1.00171e-11
rs3813582	6560707	RP11-345M22.1;RP11-345M22.2	1.25846	0.208225	-0.534291	0.59314	0.256182	0.79781	-0.9153	0.360034	-0.140313	0.888413	-0.19785	0.843163	0.879282	0.379248	1.41865	0.156002	-0.160773	0.872272	-0.414999	0.678142
rs7460625	1340398	VPS13B	-0.459759	0.64569	-0.742412	0.457838	0.774315	0.438745	-0.873404	0.382443	-1.27988	0.200586	-0.361781	0.717516	2.14469	0.0319775	-1.07637	0.281761	1.52262	0.127854	1.00494	0.314926
rs653178	840253	ALDH2	0.0426437	0.965986	0.082941	0.933898	-0.318643	0.749997	0.118606	0.905588	-1.07747	0.281269	-0.187748	0.851074	-0.77548	0.438056	-0.0538726	0.957037	-1.69409	0.0902486	-0.968706	0.332692
rs4780355	4540072	RMI2	0.548054	0.583655	-0.270311	0.786921	0.123761	0.901505	1.00803	0.313442	-0.547146	0.584279	0.250992	0.80182	-1.05163	0.292971	-2.11177	0.0347059	-1.52725	0.126699	-0.66177	0.508118
rs3763313	4610044	EGFL8;AGPAT1	1.31356	0.188996	-1.38984	0.164578	1.25659	0.208901	-1.26486	0.205921	-0.424835	0.670957	1.79608	0.0724814	0.929433	0.352665	0.446991	0.654882	-0.682669	0.494816	0.0165887	0.986765
rs2252865	10008	RERE	0.536631	0.591522	0.183943	0.854058	-1.01739	0.308968	0.79296	0.427801	1.66905	0.0951071	0.681206	0.495741	1.38525	0.165976	-0.670393	0.502607	2.1671	0.0302272	1.10357	0.269782
rs2130392	2260215	CASP3	-1.24633	0.212642	1.66235	0.0964423	-0.241357	0.809278	0.925838	0.35453	1.35553	0.175248	-0.185493	0.852843	-0.187748	0.851074	-0.3467	0.728817	1.5475	0.121743	0.293982	0.768772
rs4577037	1450008	IL16	0.203212	0.83897	-1.8229	0.0683187	2.16991	0.0300136	-1.15013	0.250092	-1.51009	0.131019	-1.53596	0.124549	1.32418	0.185445	-0.435872	0.66293	-0.133301	0.893955	1.12097	0.262301
rs424535	380424	CFH	-0.149759	0.880955	0.945162	0.344576	-2.06514	0.0389097	1.0964	0.272904	3.5374	0.000404086	1.46049	0.144155	0.661763	0.508123	0.954755	0.339702	2.67095	0.0075637	1.88492	0.0594404
rs380779	5910152	RP11-420G6.4	0.850859	0.394848	1.73784	0.0822383	-0.868348	0.385204	2.74018	0.00614063	0.836122	0.403086	0.000935203	0.999254	-2.21708	0.0266175	0.963345	0.335375	-2.39321	0.0167017	-0.361715	0.717565
rs6136489	5360193	SIRPA	-0.180576	0.8567	-0.544203	0.586302	-0.283331	0.776923	2.07355	0.038121	-0.357429	0.720771	-0.457865	0.647049	0.316811	0.751387	-2.83579	0.00457131	0.0711513	0.943277	0.0558544	0.955458
rs1411189	610341	WAC	0.681602	0.495491	-0.101836	0.918887	-0.739726	0.459466	0.812929	0.416259	0.629609	0.52895	-0.571349	0.567763	1.15651	0.247472	0.661335	0.508398	1.76203	0.0780636	1.89884	0.0575861
rs6458307	3440086	PEX6	1.06655	0.286173	-0.893881	0.371386	1.30105	0.193242	-1.22094	0.22211	-0.985173	0.324539	-0.322414	0.747139	0.000123017	0.999902	-0.184614	0.853532	-0.868103	0.385338	0.0306039	0.975585
rs918106	2140291	MMAB	-1.46908	0.141811	0.216187	0.828842	-0.423397	0.672006	0.304647	0.760635	-0.884502	0.376425	-1.50584	0.132108	0.834585	0.403952	-1.28042	0.200399	-0.23013	0.817991	-0.937612	0.348444
rs2136677	3930452	CDK19	-0.544006	0.586437	1.47464	0.14031	-1.83417	0.066628	1.62443	0.104283	0.806699	0.41984	-0.0963098	0.923275	0.743889	0.456943	-0.0760569	0.939374	0.957304	0.338414	-1.01519	0.310014
rs1172822	3290161	TMEM86B	-0.794713	0.426781	1.32546	0.18502	-0.981811	0.326193	1.77657	0.0756389	0.766602	0.443318	-0.750753	0.452801	-1.98343	0.0473192	-0.576156	0.56451	-1.13591	0.255994	-0.912808	0.361344
rs2270664	1570291	RNF111;SLTM	-0.956201	0.338971	-0.067595	0.946108	0.0452913	0.963875	-0.372071	0.70984	0.629577	0.528971	-0.443822	0.657171	0.742837	0.45758	-0.576503	0.564276	2.15613	0.0310737	0.106136	0.915475
rs3764261	7510079	CETP	1.20766	0.227179	1.19581	0.231772	-0.708962	0.478348	1.03589	0.300253	1.56768	0.116955	0.479439	0.631627	-0.787477	0.431003	1.08991	0.275755	1.03114	0.302476	1.2931	0.195975
rs8052560	1450082	TRAPPC2L	1.8721	0.0611923	-0.759362	0.447636	-0.262459	0.792968	0.206497	0.836402	0.0705463	0.943759	0.671159	0.502119	-0.317084	0.75118	1.46708	0.142355	-1.09024	0.275608	0.259824	0.795
rs2766692	3710068	RP11-638I2.8;WARS	2.33122	0.0197415	0.337906	0.735434	-0.170235	0.864825	0.326087	0.744359	1.50736	0.131717	2.23953	0.0251217	-0.102579	0.918297	0.686887	0.492154	0.994506	0.319977	2.50721	0.0121688
rs3817514	730139	MRPL48	-0.179352	0.857661	0.230963	0.817343	-0.853234	0.39353	-0.79128	0.428781	0.828077	0.407627	-0.675306	0.499481	2.91334	0.00357581	1.76233	0.0780136	2.62823	0.00858299	2.79216	0.00523582
rs311678	2370639	MB21D1	0.0864815	0.931084	0.87769	0.380112	-1.20855	0.226838	0.728669	0.466204	0.805532	0.420513	-0.150628	0.880269	0.683747	0.494135	0.661922	0.508021	0.923476	0.355759	0.914524	0.360442
rs634801	6650458	STOML2	0.251521	0.801411	-0.556289	0.578013	0.413426	0.679295	-0.739427	0.459648	-0.0442903	0.964673	1.04796	0.294656	1.49775	0.134199	0.288107	0.773265	0.68946	0.490534	-0.733006	0.463555
rs12062199	460168	XCL1	0.596315	0.550965	4.72064	2.35107e-06	-4.8109	1.50256e-06	1.96023	0.0499686	5.36695	8.00777e-08	2.54835	0.0108234	-2.20177	0.0276816	1.68449	0.0920862	1.14709	0.251346	2.30325	0.0212646
rs1004910	6270022	HCK	0.54307	0.587082	-0.0454377	0.963758	-1.46915	0.141793	0.194566	0.845732	0.987078	0.323604	1.0881	0.276551	0.720282	0.471351	0.0554042	0.955816	0.997765	0.318393	2.62142	0.00875636
rs7197653	3140386	RP11-96D1.5;NFATC3	0.389499	0.696907	-0.571551	0.567626	0.0410407	0.967263	-1.81161	0.0700463	0.577006	0.563935	0.714393	0.474984	0.755	0.450249	0.369494	0.71176	1.17228	0.241086	1.22645	0.22003
rs6995402	1990255	SHARPIN;MAF1	-0.775641	0.437961	-1.43353	0.151706	1.06926	0.284954	-0.0640364	0.948941	-1.0686	0.285248	-0.512199	0.608512	2.11201	0.0346853	-1.00148	0.316594	0.702583	0.482316	-0.0292213	0.976688
rs12537284	4280647	-	0.390708	0.696013	1.40073	0.161294	-0.371724	0.710099	0.674959	0.499702	1.46807	0.142085	0.814036	0.415624	-1.56481	0.117628	1.00244	0.316129	-0.428805	0.668065	0.0327784	0.973851
rs2298480	430333	NLRX1	0.778608	0.436211	-0.724629	0.46868	1.98278	0.0473922	-0.344459	0.730501	-0.484701	0.627889	-0.289392	0.772281	-0.114916	0.908512	-0.340495	0.733484	-0.631451	0.527746	0.528882	0.596887
rs2164475	830736	RARB	0.985146	0.324553	-0.635814	0.524898	1.7088	0.0874882	-1.14325	0.252937	-1.25125	0.210841	1.41593	0.156797	-0.972671	0.330717	0.387397	0.698462	-1.92432	0.054314	-0.348368	0.727564
rs878129	2000301	DCLRE1B	-1.75036	0.0800569	0.0400633	0.968043	-0.723895	0.46913	0.288286	0.773128	-0.894353	0.371133	-1.86286	0.0624826	2.6805	0.00735115	-1.28489	0.19883	1.26535	0.205745	0.477472	0.633026
rs1680005	7210717	FGD2	-0.579001	0.562589	1.42259	0.154854	-1.54837	0.121532	1.68429	0.092125	0.380911	0.703269	-0.608096	0.543124	-1.28469	0.198901	2.3617	0.0181915	-2.00772	0.0446733	-0.916404	0.359455
rs254284	5860154	SHROOM1	0.429386	0.667642	0.672356	0.501357	0.0523385	0.958259	-0.525257	0.599405	0.545334	0.585524	-0.0229988	0.981651	0.157733	0.874667	0.562901	0.573502	0.45091	0.652054	0.10113	0.919447
rs262558	620008	CTC-518P12.6;PLIN3	1.14069	0.253999	0.476198	0.633933	-1.76439	0.0776671	1.14482	0.252283	0.272194	0.785473	0.182582	0.855126	-1.44133	0.14949	0.11722	0.906686	-1.41688	0.156519	-1.72079	0.085288
rs11800820	6650121	CNST	-0.895641	0.370445	1.6089	0.107638	-2.58719	0.00967631	0.0361495	0.971163	1.62863	0.103391	0.874393	0.381904	0.1092	0.913044	-0.52731	0.597979	1.65034	0.0988734	0.688095	0.491393
rs3807592	7160553	HOXA-AS2;HOXA3;HOXA4	-0.166052	0.868116	-0.516643	0.605405	1.6527	0.0983912	0.981808	0.326194	-0.92284	0.356091	-1.13024	0.258373	-0.461835	0.644199	-1.10925	0.267324	-1.16646	0.243427	0.681237	0.495722
rs4557020	5390487	SPTBN1	1.59663	0.110349	0.793276	0.427617	0.614755	0.538716	0.228072	0.81959	1.30508	0.191865	1.61281	0.106786	0.0700344	0.944166	-0.569032	0.569334	0.812137	0.416713	1.23524	0.216741
rs1536760	160605	RASA3	0.978523	0.327816	-0.53247	0.594401	-0.800753	0.423275	0.946962	0.343658	-0.519005	0.603757	-0.899122	0.368588	-0.359753	0.719032	-0.598098	0.549775	-0.375896	0.706994	0.497672	0.618715
rs2040792	4590224	NF1;CTD-2370N5.3;EVI2A	-1.48613	0.137245	1.83829	0.0660203	-0.669567	0.503134	0.379035	0.704662	2.71726	0.00658248	-0.130947	0.895817	0.341298	0.732879	-1.21433	0.224621	1.52197	0.128016	0.18091	0.856438
rs6688363	3610228	PEA15	-2.28718	0.0221853	-0.130965	0.895803	0.889086	0.373957	0.0438803	0.965	0.505636	0.613112	-1.63744	0.101539	1.59856	0.109919	-0.313363	0.754005	2.14955	0.0315912	1.25045	0.211135
rs12229020	3780358	CLEC12A	11.5659	6.13745e-31	-1.96663	0.0492256	2.29211	0.0218993	-0.231162	0.817189	6.10289	1.04165e-09	8.54238	1.31483e-17	7.81718	5.40218e-15	6.51764	7.14217e-11	7.36769	1.7361e-13	13.3584	1.05849e-40
rs603424	240097	RP11-316M21.6;CWF19L1	-2.58504	0.00973668	0.744847	0.456364	-1.08185	0.279317	-1.15356	0.248679	-0.0503702	0.959827	-0.507437	0.611849	0.00769947	0.993857	0.623864	0.532717	-0.280242	0.779292	-1.16508	0.243985
rs708382	1940021	GRN	-0.783102	0.433567	0.299779	0.764345	0.934409	0.350093	0.351232	0.725414	-0.819377	0.412571	-0.658904	0.509958	0.781639	0.434427	-1.21819	0.223152	-0.0769426	0.938669	0.510385	0.609782
rs7220048	70767	BAIAP2	0.662818	0.507447	0.348929	0.727143	-0.645491	0.518609	0.0618412	0.950689	-0.205544	0.837147	-0.125421	0.900191	-0.916307	0.359506	0.45701	0.647664	-0.598782	0.549318	-1.21483	0.224431
rs735396	6280543	OASL	-0.326607	0.743965	-0.125241	0.900332	0.115872	0.907754	-1.05032	0.293571	-0.263918	0.791843	-0.964246	0.334923	0.149736	0.880973	2.39049	0.0168258	-0.313369	0.754	-0.164559	0.869291
rs228942	3170152	IL2RB	2.14007	0.0323489	1.10669	0.268428	-0.361561	0.71768	2.50158	0.0123642	0.758103	0.448389	2.24694	0.0246439	-0.936867	0.348827	1.47765	0.1395	-0.593363	0.552938	0.52673	0.598381
rs3117582	1440603	-	1.48261	0.138177	1.7794	0.0751744	-3.45372	0.000552915	2.38684	0.0169939	3.00236	0.00267894	2.1003	0.0357029	-1.21839	0.223077	3.20809	0.00133621	-0.40313	0.686852	1.96174	0.0497933
rs3800461	7320110	C6orf106	-1.05114	0.293195	-0.966213	0.333937	-0.160222	0.872706	0.568999	0.569356	-1.70047	0.0890425	-1.65797	0.0973244	-0.0290004	0.976864	-1.02951	0.303241	-0.578901	0.562656	-1.66157	0.0965986
rs457420	6660626	BRD3	2.86293	0.00419744	1.43437	0.151467	-1.91938	0.054936	1.88436	0.0595156	0.388266	0.697819	2.54388	0.0109628	-2.50343	0.0122995	2.91008	0.00361337	-1.41922	0.155835	0.593836	0.552622
rs499368	6220332	-	0.0435089	0.965296	-0.476438	0.633762	0.429505	0.667555	-1.93885	0.05252	-0.519144	0.60366	0.610716	0.541387	0.07859	0.937359	-1.44604	0.148166	-0.0169868	0.986447	0.947727	0.343269
rs504136	3400360	MAPRE2	0.014739	0.98824	-0.392434	0.694737	-0.486008	0.626962	-0.0219597	0.98248	0.884806	0.376261	-0.400806	0.688563	1.34154	0.179745	-0.11108	0.911553	1.26829	0.204693	0.335606	0.737168
rs17291650	7510392	DIP2B	1.8683	0.0617197	-0.362368	0.717077	0.467237	0.64033	0.0072502	0.994215	0.806227	0.420112	1.40766	0.159233	0.309747	0.756753	1.48915	0.136447	0.894348	0.371136	1.53416	0.12499
rs1569857	7570068	RP1-85F18.6;RP1-85F18.5;EP300	1.72948	0.0837232	0.255739	0.798152	0.502245	0.615495	0.442458	0.658158	-0.274554	0.783659	0.0979708	0.921955	-0.479541	0.631554	-0.392566	0.69464	-1.29308	0.195984	-0.49173	0.62291
rs7715602	620603	FER	-0.996388	0.319061	0.420123	0.674396	0.741171	0.45859	-0.430237	0.667023	-0.714738	0.474771	-0.805523	0.420518	0.142669	0.886551	-0.437114	0.662029	-0.236549	0.813006	0.544453	0.58613
rs10197940	7610309	RBM43	-0.0956714	0.923782	-0.712752	0.475999	1.11538	0.264689	0.0277951	0.977826	-0.957522	0.338304	-0.804708	0.420988	1.25368	0.20996	2.95795	0.00309688	0.478766	0.632105	2.16067	0.030721
rs520342	6380315	ITM2B	1.74275	0.0813766	-0.194708	0.845621	-0.0109202	0.991287	-0.203282	0.838914	-0.0219328	0.982502	0.817023	0.413915	-0.799788	0.423834	-0.192251	0.847546	-0.0782213	0.937652	-1.0412	0.297781
rs7644362	1030463	PROK2	-1.70227	0.0887042	0.721136	0.470826	-0.498015	0.618473	0.574688	0.565502	-0.123909	0.901388	-1.4896	0.13633	-0.321319	0.747969	0.481672	0.630039	0.234471	0.81462	0.337035	0.73609
rs7072606	6620022	WDFY4	2.08661	0.0369235	-0.144259	0.885296	-0.212434	0.831768	-0.627611	0.530259	1.3306	0.18332	2.37158	0.0177121	3.51448	0.00044061	1.34066	0.180031	3.11777	0.00182223	3.59241	0.000327631
rs6977940	7150465	AMZ1;GNA12	2.8085	0.00497723	-0.413074	0.679552	3.01777	0.00254641	-1.63811	0.101398	-0.452148	0.651162	1.30083	0.193316	0.462834	0.643483	0.0735093	0.941401	-0.265623	0.79053	3.2735	0.00106226
rs700237	610152	C9;DAB2	-0.314248	0.753333	-1.72571	0.0843998	0.236168	0.813302	-1.37666	0.168618	-1.13774	0.255229	-0.859714	0.389946	2.47411	0.0133568	0.327018	0.743654	0.795602	0.426264	0.274918	0.78338
rs1443438	3440446	C9orf156	-1.97048	0.0487837	0.917588	0.358835	-0.0522814	0.958305	1.97874	0.0478456	-0.207594	0.835546	-1.12227	0.261748	-0.30454	0.760717	-0.631897	0.527454	0.235519	0.813806	-0.49188	0.622804
rs2066808	2750039	RBMS2	0.475999	0.634075	0.404353	0.685953	-0.646393	0.518025	0.941428	0.346485	0.497133	0.619095	0.976299	0.328916	-1.38403	0.166348	-0.562804	0.573568	-0.570063	0.568635	0.0506587	0.959597
rs11136341	4490142	RP11-299M14.2;NRBP2	-0.547957	0.583721	1.76223	0.0780296	-0.395129	0.692747	2.34776	0.0188865	2.07542	0.0379478	0.883515	0.376958	0.81801	0.413351	-0.622549	0.533581	1.74023	0.0818183	1.28891	0.197431
rs11052552	2570132	CLEC2D	0.0754548	0.939853	0.67188	0.50166	0.334362	0.738107	-0.0121903	0.990274	1.64195	0.1006	-0.753647	0.451061	0.702484	0.482378	-0.869455	0.384598	2.27545	0.0228789	0.149397	0.881241
rs4376959	4640435	CHD4	-0.383349	0.701461	-0.519105	0.603688	-0.187695	0.851116	-1.34117	0.179866	0.958754	0.337683	0.476209	0.633926	0.578593	0.562864	0.0795084	0.936628	0.322683	0.746935	-0.268611	0.788229
rs6060373	1850681	RP4-614O4.11;EIF6	0.408857	0.682645	0.815124	0.415002	-0.401983	0.687697	-0.181339	0.856102	1.15529	0.247973	0.463825	0.642773	1.22457	0.220738	1.13684	0.255604	1.3234	0.185702	2.76235	0.00573865
rs17512962	5260215	OPTN	-1.92367	0.054396	3.76862	0.000164152	-3.82921	0.000128556	3.21909	0.00128598	4.08939	4.32508e-05	1.33099	0.183192	1.53854	0.123917	1.20717	0.227369	3.17494	0.00149866	1.9405	0.0523184
rs15740	4390372	BNIPL	3.12989	0.00174873	2.21581	0.0267047	-1.49924	0.133812	1.04677	0.295203	1.74628	0.080762	2.76188	0.00574705	-1.45959	0.144403	1.15671	0.247392	-0.702534	0.482346	1.2147	0.22448
rs2170563	6130138	POLR3C	1.56237	0.1182	-0.531317	0.595199	0.298828	0.765071	0.342184	0.732213	0.609193	0.542396	1.6802	0.0929177	0.888692	0.374168	0.421984	0.673037	1.21715	0.223546	1.0634	0.287601
rs7322077	6100521	PHF11	1.26409	0.206198	-0.478268	0.632459	0.0702091	0.944027	0.359885	0.718933	0.486754	0.626432	0.268499	0.788315	1.94813	0.0513993	1.29599	0.19498	0.837403	0.402366	3.51856	0.000433895
rs354033	5090544	ZNF767	-1.38044	0.167452	1.27482	0.202372	0.576099	0.564548	0.794943	0.426647	0.939463	0.347493	-0.273904	0.784159	2.44212	0.0146011	-0.289114	0.772494	1.76692	0.0772414	0.661088	0.508556
rs1957949	4260497	MAX	0.288647	0.772851	1.09795	0.272225	-1.43563	0.151108	0.338939	0.734656	0.390706	0.696014	0.709503	0.478012	-0.0971514	0.922606	0.498432	0.61818	0.111361	0.91133	-0.279626	0.779765
rs713586	620072	DNAJC27	-0.293895	0.768838	0.730915	0.464831	-0.334171	0.73825	0.374946	0.707701	0.0444841	0.964519	0.548133	0.583601	0.56926	0.56918	-0.260585	0.794412	0.603104	0.54644	-0.385194	0.700094
rs221045	6250546	ARHGEF19-AS1;ARHGEF19	0.205206	0.837411	0.628668	0.529566	1.21742	0.223444	0.483718	0.628586	-0.892553	0.372097	-0.872122	0.383142	-1.10521	0.269069	-1.13191	0.25767	-1.88878	0.0589218	0.771873	0.44019
rs6677664	3360717	PIK3CD	-0.837344	0.402399	-0.346238	0.729164	0.233749	0.81518	0.28146	0.778357	-0.153037	0.878369	-1.44221	0.149244	0.259778	0.795035	-0.44315	0.657657	0.0735717	0.941351	-0.582218	0.56042
rs3783449	4780671	ERO1L	3.36208	0.000773569	1.26304	0.206575	0.570395	0.56841	0.344873	0.73019	1.88712	0.0591447	3.06413	0.00218302	-0.95371	0.340231	0.790421	0.429282	0.67124	0.502068	2.59994	0.00932387
rs3792109	3420347	ATG16L1	-1.13708	0.255506	0.52737	0.597937	0.749503	0.453554	-0.000848497	0.999323	-0.889749	0.373601	-0.847562	0.396682	-2.29237	0.0218841	0.119614	0.904789	-2.73035	0.00632664	-1.37093	0.170396
rs391525	150072	IRF8	-0.901316	0.36742	0.376877	0.706265	0.262303	0.793088	1.01339	0.310876	0.0393619	0.968602	-0.723095	0.469622	-0.311523	0.755403	-0.783256	0.433477	-0.583624	0.559473	-0.00801151	0.993608
rs9809619	6250382	ANAPC13	-1.25613	0.209068	2.05334	0.0400398	-0.404618	0.685759	0.616478	0.537579	2.38758	0.0169597	-0.100287	0.920117	0.250178	0.802449	1.79861	0.0720798	1.10654	0.268492	0.464428	0.642341
rs1802295	1660196	HK1	0.573074	0.566594	-0.0529117	0.957802	0.570618	0.568259	1.10244	0.270271	0.273101	0.784776	0.569094	0.569292	0.683488	0.494298	0.852094	0.394162	0.805032	0.420801	1.78027	0.0750323
rs7154637	7040470	KIAA0391;PSMA6	-1.33305	0.182514	-1.62494	0.104175	1.09358	0.274138	-0.632936	0.526775	-2.22295	0.0262193	-1.63184	0.102713	0.730318	0.465196	-1.56701	0.117112	-0.558346	0.576608	-0.593127	0.553096
rs886427	380437	PRSS30P	1.05461	0.291604	0.237438	0.812317	-0.491833	0.622837	0.68788	0.491529	0.634674	0.525641	1.09034	0.275564	-0.564704	0.572275	0.731657	0.464378	-0.510955	0.609382	0.759075	0.447807
rs1007081	5810044	RP5-837M10.4;CDC14A	-1.21571	0.224097	0.613891	0.539288	-0.835219	0.403594	0.565582	0.571678	2.62105	0.00876589	-0.317066	0.751194	5.22875	1.70662e-07	0.339439	0.734279	5.62162	1.89177e-08	3.32122	0.000896263
rs2521501	3290431	AC068831.6;UNC45A	-0.7223	0.47011	0.932963	0.350839	-1.228	0.219446	1.99944	0.0455613	-0.256337	0.797691	-0.0128583	0.989741	-0.582709	0.560089	-0.139811	0.88881	-1.17289	0.240841	0.127422	0.898607
rs1043963	1010692	NR2F6	-0.147231	0.88295	1.92647	0.0540452	-1.13681	0.255619	1.16912	0.242357	-0.379049	0.704652	-1.11532	0.264711	0.235998	0.813434	1.80937	0.0703937	-0.363219	0.716441	0.203802	0.838508
rs3817198	670240	TNNT3	1.80838	0.0705481	-1.84681	0.064775	1.70709	0.0878056	-0.211487	0.832507	-0.624216	0.532486	1.07107	0.284136	1.64097	0.100804	1.1484	0.250802	-0.35147	0.725236	1.44067	0.149677
rs220381	4640438	ZNF263;TIGD7	0.474986	0.634797	2.31409	0.020663	-0.492903	0.622081	0.675144	0.499584	1.4855	0.137412	0.302453	0.762307	-0.504498	0.613912	-0.586654	0.557436	0.998829	0.317878	-0.446937	0.654921
rs1048145	60523	IL20RB	1.669	0.0951178	0.153364	0.878111	-0.565613	0.571657	0.193811	0.846323	0.838746	0.401612	0.32029	0.748748	0.322352	0.747186	0.435488	0.663208	0.753895	0.450912	1.67547	0.0938415
rs8108875	3290259	NAPSB;NR1H2	3.02043	0.00252413	-0.151001	0.879975	2.66145	0.00778039	-3.14311	0.00167161	2.93987	0.00328352	3.72648	0.000194175	1.13532	0.25624	4.67742	2.90503e-06	1.62955	0.103197	4.68852	2.75185e-06
rs9582406	2510390	TMTC4	0.614561	0.538845	1.43897	0.15016	-0.883665	0.376877	1.9762	0.0481326	2.87207	0.00407791	1.55396	0.120193	4.48608	7.25472e-06	1.93163	0.0534056	4.40397	1.06289e-05	6.72846	1.71464e-11
rs4804827	3610148	EVI5L	1.43989	0.149897	-1.20228	0.229254	1.09099	0.275276	-0.102837	0.918092	-0.643015	0.520214	-1.10961	0.267165	1.12565	0.260314	-0.261007	0.794087	0.109663	0.912677	0.723972	0.469083
rs2507	5340435	STOML1	-1.68192	0.0925842	1.59844	0.109945	-2.3755	0.0175252	0.650609	0.515299	0.928005	0.353405	-0.887035	0.37506	-0.817444	0.413675	2.00368	0.0451047	0.377285	0.705962	-0.0369595	0.970517
rs4783630	10474	NFATC3	2.014	0.0440098	0.370069	0.711331	0.567651	0.570272	-0.822329	0.410889	0.517347	0.604914	1.12698	0.25975	0.516363	0.605601	1.48347	0.13795	0.397019	0.691354	2.02603	0.042762
rs10915864	1740020	RP11-285F7.2;TMEM63A	-1.46014	0.144252	-0.846672	0.397178	1.35272	0.176146	-1.16986	0.242057	-1.74802	0.0804604	-1.12989	0.258521	1.29212	0.196316	-0.581371	0.56099	-0.90028	0.367972	-0.428674	0.668161
rs710984	6370670	RP11-121L11.1	-0.283647	0.776681	0.210218	0.833498	-2.03293	0.0420592	1.09238	0.274668	0.50728	0.611959	0.197636	0.84333	-0.24358	0.807556	1.98834	0.0467743	-0.290945	0.771093	-0.0147686	0.988217
rs13702	5560674	LPL	1.91928	0.0549493	0.93434	0.350128	-1.50017	0.133569	0.580759	0.561403	1.05561	0.291148	2.21838	0.0265289	-0.885532	0.37587	2.18119	0.0291692	-0.15862	0.873968	1.63518	0.10201
rs6456762	3390050	RP11-457M11.5	-0.928896	0.352943	0.917103	0.359089	0.0755464	0.93978	1.74856	0.0803677	2.32274	0.0201933	0.619281	0.535731	1.66884	0.09515	-0.385479	0.699883	2.73344	0.00626761	3.11715	0.00182606
rs8040061	870110	RP11-69H7.3;C15orf39	0.722823	0.469789	0.116292	0.907421	1.52244	0.127899	0.738187	0.460401	-0.256274	0.797739	0.281562	0.778279	-0.30755	0.758425	1.46208	0.14372	-0.926141	0.354372	-0.0493861	0.960612
rs2053924	6650064	SIGLEC5	1.88821	0.0589973	0.251018	0.8018	-0.107412	0.914462	0.628325	0.529791	0.88527	0.376011	1.21918	0.222778	1.60964	0.107476	0.60286	0.546602	1.37419	0.169382	0.55247	0.580626
rs2244608	50414	HNF1A;C12orf43	0.46269	0.643587	-0.288317	0.773104	0.58373	0.559402	0.595992	0.55118	0.197602	0.843356	0.0438148	0.965052	2.03698	0.0416522	0.798236	0.424733	1.91981	0.0548813	1.90497	0.0567846
rs8108243	2100431	RCN3	-0.922396	0.356322	-2.0373	0.0416201	0.551745	0.581123	-1.62593	0.103965	-1.60462	0.108578	-0.965095	0.334497	2.65189	0.00800415	-1.59743	0.11017	0.506793	0.6123	-1.29749	0.194463
rs11925571	520709	OXNAD1	0.796967	0.42547	2.55151	0.0107256	-2.69564	0.00702544	1.62258	0.10468	2.74883	0.00598082	1.65239	0.0984561	0.662513	0.507643	1.55599	0.119711	2.39441	0.0166473	3.06377	0.00218567
rs6941158	2350685	HEY2	-0.524948	0.599619	-0.635404	0.525165	0.00174932	0.998604	-0.672598	0.501203	-1.23089	0.218364	-1.64415	0.100144	0.307874	0.758178	-0.0834308	0.933509	-1.35293	0.176079	-0.035804	0.971439
rs1980493	270168	HLA-DRA	2.44442	0.0145086	-1.92568	0.0541444	1.49324	0.135375	-1.94711	0.0515219	0.423106	0.672218	1.97457	0.0483174	0.461725	0.644279	0.176004	0.860291	0.0471874	0.962364	1.40594	0.159741
rs9468925	3170064	MICB	-0.0901187	0.928193	0.566867	0.570805	0.543838	0.586553	1.81984	0.0687839	1.83809	0.0660495	0.962836	0.33563	0.591658	0.554079	1.02873	0.303609	0.360536	0.718446	0.91136	0.362106
rs12479254	5960703	2015-09-02	-0.808059	0.419057	0.0267952	0.978623	-0.852126	0.394144	0.239252	0.81091	1.08966	0.275863	-0.499998	0.617077	-0.955323	0.339415	2.00771	0.0446738	0.95521	0.339471	1.03775	0.299384
rs4467006	7050204	KIAA1737;RP11-463C8.4;TMEM63C	-0.274809	0.783463	-1.45131	0.146693	-0.722498	0.469988	0.135922	0.891883	-2.19682	0.0280333	-0.886452	0.375374	-1.23356	0.217367	1.24365	0.21363	-1.7543	0.0793787	-1.23497	0.216841
rs4802770	3710253	ACTN4;CAPN12	-2.6731	0.00751539	0.441859	0.658591	0.0561078	0.955256	0.271003	0.786388	-1.49731	0.134312	-2.56105	0.0104357	-1.02516	0.305288	-1.26943	0.204287	-1.96541	0.0493662	-2.97409	0.00293857
rs17154077	3780270	HBP1;COG5	-0.134431	0.893062	0.351015	0.725577	-1.86797	0.0617658	1.21208	0.225483	0.911259	0.362159	-0.0771548	0.9385	0.400611	0.688707	-0.0740728	0.940952	0.3323	0.739662	0.430436	0.666879
rs642803	4890068	MAP3K11	0.278608	0.780546	-0.0424315	0.966155	-1.06762	0.285693	0.412826	0.679734	0.161605	0.871617	0.308286	0.757865	0.501606	0.615944	-1.13587	0.256009	0.415235	0.67797	-0.456002	0.648388
rs727088	3940754	CD226	1.1748	0.240074	2.27102	0.0231457	-1.01663	0.30933	1.19578	0.231781	0.699514	0.484231	1.4884	0.136645	-1.86573	0.0620792	-0.00586163	0.995323	-2.76381	0.0057131	-0.673447	0.500663
rs6852487	1030411	DNAJB14	0.358998	0.719597	-0.389136	0.697176	-0.362936	0.716653	-0.0462811	0.963086	1.06372	0.287454	0.671311	0.502022	0.9108	0.362401	0.739835	0.4594	1.97158	0.0486575	0.900012	0.368114
rs6804667	4850670	-	0.409481	0.682187	3.32974	0.000869278	-1.54393	0.122606	1.15256	0.249093	3.34181	0.000832337	1.94222	0.05211	-1.40351	0.160465	2.27722	0.0227731	0.839023	0.401456	2.40219	0.0162975
rs4739628	940324	RP13-923O23.6;SNX16	0.188569	0.850431	3.41948	0.000627402	-3.03668	0.00239199	2.94094	0.00327221	4.10039	4.1245e-05	1.99083	0.0464997	0.821113	0.411582	2.41797	0.0156075	3.4865	0.000489377	3.53549	0.000407022
rs17486278	6020328	IREB2	2.05615	0.0397685	2.08487	0.0370807	-1.56652	0.117227	1.33913	0.180527	3.7735	0.000160972	3.44107	0.000579411	0.0334425	0.973322	1.36011	0.173796	2.16	0.0307724	3.41506	0.000637678
rs823156	4540370	RAB7L1	-1.71788	0.0858193	-0.682697	0.494798	0.0295984	0.976387	-1.20731	0.227312	-1.31039	0.190064	-2.27048	0.0231784	-0.460412	0.645221	1.35915	0.1741	-0.978718	0.327719	-1.3007	0.193362
rs838705	3420347	ATG16L1	-0.414089	0.678809	-1.2867	0.198199	1.52178	0.128064	0.0183316	0.985374	-2.11562	0.0343771	-1.12551	0.260372	0.649256	0.516173	0.13188	0.895079	-1.72511	0.0845077	-0.249426	0.803032
rs7957197	7650097	OASL	-0.0800039	0.936234	0.00812241	0.993519	-0.780206	0.435269	-0.762179	0.445953	-0.626219	0.531172	-0.426053	0.670069	0.41228	0.680134	1.35899	0.174151	-0.366051	0.714327	-0.501673	0.615897
rs2838865	2490605	POFUT2	1.40474	0.160098	0.798433	0.424619	-0.714118	0.475154	0.439387	0.660381	1.83896	0.0659204	2.07905	0.0376124	-0.270086	0.787094	0.408014	0.683264	1.28736	0.19797	2.03798	0.0415519
rs7555523	1820044	ALDH9A1	-0.129779	0.896741	-0.105515	0.915967	-0.0505286	0.959701	1.04506	0.295994	-0.473331	0.635977	-0.470138	0.638256	-0.275746	0.782743	-0.143504	0.885892	-1.69083	0.09087	-0.358255	0.720153
rs1805389	4900435	TNFSF13B	1.47828	0.139333	-0.83805	0.402003	-0.897145	0.369642	0.958616	0.337752	2.76542	0.0056849	1.28799	0.197751	1.53529	0.124712	-0.531901	0.594795	2.17724	0.029463	1.76602	0.0773921
rs1076744	5560703	C6orf120;PHF10	-0.264349	0.791511	1.72484	0.0845556	-2.67784	0.00740978	1.60592	0.108291	1.40682	0.15948	-0.226712	0.820648	-0.0230986	0.981572	-0.208359	0.834948	2.08249	0.0372979	-0.308389	0.757786
rs2303745	3610768	USHBP1;BABAM1;CTD-2278I10.6	-0.113973	0.909259	1.11173	0.266254	0.641125	0.521442	0.541833	0.587934	0.00553261	0.995586	0.0849982	0.932263	-1.66353	0.0962074	0.786579	0.431529	-1.56451	0.117697	0.0697809	0.944368
rs42490	4150520	RIPK2	-1.74641	0.080739	2.28583	0.0222642	-1.0632	0.287692	1.0056	0.31461	1.6896	0.0911038	0.622834	0.533394	-0.0629687	0.949791	0.89885	0.368733	1.17033	0.241869	0.0758686	0.939524
rs1224	70743	N4BP1	0.307144	0.758734	2.58321	0.00978867	-0.966973	0.333558	1.68884	0.0912508	2.97986	0.00288379	1.67138	0.0946461	-1.58731	0.112442	0.0814298	0.9351	0.878384	0.379735	0.290004	0.771813
rs2836754	4220605	ETS2	1.23604	0.216443	-0.629566	0.528979	0.731994	0.464172	-0.892318	0.372222	-0.409564	0.682126	0.593066	0.553137	0.367551	0.713208	1.86462	0.0622347	-0.245478	0.806087	0.331788	0.740049
rs798489	7150465	AMZ1;GNA12	1.84846	0.0645354	-0.40699	0.684016	2.55466	0.0106293	-0.500754	0.616545	-0.297631	0.765985	1.77389	0.0760809	1.63933	0.101145	0.204035	0.838326	0.458379	0.64668	2.66737	0.00764481
rs1560104	1740541	SNX29	-0.892509	0.37212	-1.13657	0.255716	1.31519	0.188447	-0.81098	0.417377	-0.419064	0.67517	-1.69654	0.0897834	0.0318421	0.974598	-1.61214	0.106932	-0.405309	0.68525	-0.431064	0.666422
rs7689566	1850220	DAPP1	0.125182	0.900379	0.608124	0.543105	-1.7864	0.0740352	0.628804	0.529477	0.295861	0.767336	-0.411805	0.680482	-0.0812316	0.935258	0.276352	0.782278	-0.404614	0.685762	-0.170317	0.864761
rs1624825	1190370	SLC5A10;GRAP	-0.874591	0.381796	2.82717	0.00469613	-2.13788	0.0325269	1.98371	0.0472881	0.452918	0.650608	0.111229	0.911435	-1.15392	0.248533	0.759218	0.447722	-1.22547	0.220397	-0.304743	0.760562
rs876537	1710674	DUSP23	0.612366	0.540296	0.689178	0.490711	-0.710698	0.477272	-0.845733	0.397702	1.51013	0.13101	1.00236	0.316169	-0.668596	0.503753	0.640662	0.521742	0.979628	0.32727	-0.585139	0.558454
rs4676410	6520328	GPR35	-0.166702	0.867604	0.730622	0.46501	-0.702322	0.482478	0.404373	0.685938	1.04548	0.295803	0.288253	0.773153	0.898112	0.369126	1.58857	0.112158	1.30867	0.190647	0.415282	0.677935
rs4927850	1850482	TNK2	-0.0673373	0.946313	-0.41994	0.674529	0.361943	0.717395	0.0825311	0.934224	0.819746	0.412361	-0.445972	0.655618	0.338464	0.735013	0.869607	0.384515	1.3498	0.177081	0.372184	0.709756
rs963730	2140519	SOS1	0.974274	0.329921	-1.09621	0.272985	1.00914	0.312908	0.573509	0.5663	-0.412292	0.680125	-0.0217633	0.982637	3.01044	0.00260872	2.96061	0.00307035	1.37277	0.169825	4.81494	1.47241e-06
rs12610384	4280292	RNF126	1.15998	0.246055	-0.199236	0.842078	-0.921556	0.35676	0.238809	0.811254	-0.0105527	0.99158	0.797287	0.425284	-0.00767298	0.993878	2.61832	0.0088363	-0.472977	0.636229	1.12982	0.258553
rs2075672	3850703	MOSPD3	1.7613	0.0781876	0.61336	0.539638	-1.59653	0.110371	0.775492	0.438049	2.04041	0.0413093	2.39394	0.0166687	1.57221	0.115901	1.04209	0.297372	2.34097	0.0192337	1.73243	0.0831979
rs11124177	5900468	HDAC4	0.370924	0.710694	-1.83748	0.0661387	2.98073	0.00287558	-2.51846	0.011787	1.07335	0.283113	0.557022	0.577512	1.45917	0.144519	0.437108	0.662033	2.19003	0.0285223	2.19958	0.0278365
rs1718235	5720008	CMSS1;FILIP1L	-0.42096	0.673784	-0.0574169	0.954213	0.615956	0.537923	-0.169221	0.865623	0.338639	0.734882	0.130106	0.896483	1.04703	0.295086	-0.383625	0.701256	2.02363	0.0430081	1.3647	0.172347
rs677344	5270743	PTPRA	-0.779267	0.435823	-1.56671	0.117183	1.93012	0.0535924	-1.75397	0.0794352	0.0178348	0.985771	-0.966878	0.333605	1.48709	0.13699	-0.310159	0.75644	0.485207	0.627529	0.318981	0.749741
rs1469169	7400164	-	1.60457	0.108587	-0.509995	0.610055	-0.18436	0.853731	1.90549	0.0567169	1.01018	0.312409	1.57102	0.116179	0.0448371	0.964237	0.357438	0.720764	-0.084465	0.932687	0.802671	0.422165
rs2303369	6370494	AC074117.10;EIF2B4	-0.262702	0.79278	-0.448206	0.654005	0.637504	0.523796	0.193838	0.846303	0.714419	0.474968	0.303374	0.761605	0.973085	0.330511	0.263268	0.792344	1.03062	0.302719	0.535893	0.592033
rs703842	870056	METTL21B;RP11-571M6.15	-3.70742	0.000209379	0.844896	0.398169	-1.15965	0.246193	2.73462	0.00624519	0.686507	0.492394	-2.37687	0.0174604	0.40758	0.683582	-1.57367	0.115565	0.554574	0.579186	-1.00974	0.312618
rs10494944	4640347	LPGAT1	-0.168567	0.866137	0.55858	0.576449	-0.170484	0.864629	-0.341956	0.732384	1.5299	0.126042	0.545901	0.585134	1.40622	0.159658	0.0405803	0.96763	1.80325	0.0713493	1.34796	0.177671
rs6872807	4230373	MAP3K1	0.234113	0.814897	-0.483142	0.628995	-0.508043	0.611423	0.712181	0.476353	0.822948	0.410538	-0.12054	0.904055	-0.649356	0.516109	1.1159	0.264465	-0.0659559	0.947413	-0.393628	0.693856
rs753279	3120576	IK	-0.539453	0.589575	1.4353	0.151202	-1.24717	0.212335	1.88193	0.0598459	1.63753	0.10152	-0.15516	0.876695	-1.23225	0.217854	-0.160634	0.872382	-0.237903	0.811957	-0.143327	0.886032
rs10917477	5090156	NBL1	0.629742	0.528863	-0.327249	0.74348	0.177021	0.859492	-1.17879	0.23848	-0.643065	0.520182	-0.476715	0.633565	0.62273	0.533462	0.0156173	0.98754	0.228427	0.819314	-0.710688	0.477278
rs1265093	7150630	HLA-C	-0.499938	0.617119	-0.566938	0.570756	1.17341	0.240631	0.48899	0.624849	0.115913	0.907722	-0.964481	0.334805	5.54212	2.98837e-08	0.194929	0.845448	3.64333	0.00026913	4.43338	9.27674e-06
rs1771576	4730204	FCRLB	1.60903	0.10761	-1.06051	0.288911	-0.112063	0.910774	-0.281756	0.77813	-0.294295	0.768532	1.29012	0.197007	-0.467391	0.64022	1.30201	0.192912	-0.903581	0.366217	1.28192	0.199872
rs2305480	1500112	ORMDL3	-2.05846	0.0395456	0.692464	0.488646	-0.289992	0.771822	0.890116	0.373404	0.703402	0.481805	-1.42116	0.155272	0.631465	0.527737	-0.0413459	0.96702	1.62713	0.103709	-0.390039	0.696507
rs2652834	1570669	LACTB;RPS27L	-0.395816	0.692241	0.497885	0.618565	0.516208	0.605709	1.25401	0.209837	1.2052	0.228126	0.602818	0.54663	1.32155	0.186317	-0.40116	0.688302	0.923234	0.355885	1.56038	0.11867
rs11245086	2230091	LHPP	-0.557066	0.577483	1.13687	0.255591	-0.932839	0.350903	1.04431	0.296343	0.839029	0.401453	-0.293127	0.769425	0.781174	0.4347	0.381487	0.702842	0.137232	0.890848	0.543883	0.586522
rs2072153	830132	PHOSPHO1	-0.0673656	0.946291	-1.38867	0.164932	3.24573	0.00117149	-0.0884227	0.929541	-1.39707	0.162391	-1.0344	0.300949	0.392757	0.694499	-0.855822	0.392096	0.202447	0.839567	1.31284	0.189235
rs742208	4590450	DTNBP1	1.42881	0.153058	-1.04606	0.295533	1.98624	0.0470071	0.307094	0.758772	-0.234123	0.81489	0.751347	0.452444	1.68715	0.091575	1.30422	0.192157	0.638445	0.523184	1.03063	0.302712
rs11097796	4260156	CISD2;SLC9B1	0.726242	0.467691	-0.643734	0.519748	-0.846145	0.397472	0.0716977	0.942842	-0.127133	0.898835	-0.756501	0.449349	0.737929	0.460558	0.984424	0.324907	-0.843831	0.398764	0.16987	0.865113
rs7338868	70730	GAS6-AS1;GAS6	-1.22337	0.221192	2.47903	0.013174	-1.34365	0.179062	1.79324	0.0729345	2.02835	0.0425249	0.503621	0.614528	-2.11087	0.0347836	0.390074	0.696482	-0.424282	0.671361	0.0326981	0.973915
rs2066808	1510564	CNPY2;RP11-977G19.11	-1.18199	0.237211	0.767703	0.442664	0.417199	0.676533	0.595053	0.551808	0.0191769	0.9847	-0.866932	0.385979	-0.173888	0.861953	-0.699265	0.484387	-1.06795	0.285543	0.545808	0.585198
rs7220048	5550132	AATK	-0.111929	0.910879	0.399538	0.689497	2.10882	0.0349604	0.860899	0.389294	0.595055	0.551806	1.84129	0.0655796	-0.93795	0.34827	1.15547	0.247898	-0.327723	0.743121	1.5216	0.128109
rs11658329	4210600	FTSJ3	-0.649709	0.51588	-0.391297	0.695577	0.287283	0.773896	-0.316453	0.751658	-0.00376299	0.996998	0.101323	0.919294	0.781405	0.434564	0.93502	0.349778	0.414015	0.678863	0.229978	0.818109
rs1467414	5050270	SALL4	-0.686337	0.492501	-0.91342	0.361022	1.59468	0.110783	-1.688	0.0914115	-2.04981	0.0403829	-1.01186	0.311606	0.286151	0.774762	-2.23363	0.0255074	-0.755523	0.449935	0.656955	0.51121
rs658604	6660112	RP11-664D1.1	-0.47079	0.63779	0.390116	0.69645	0.0177278	0.985856	1.43208	0.152121	-0.7446	0.456514	-0.698108	0.48511	0.485728	0.62716	0.627902	0.530068	-1.39223	0.163852	-0.681194	0.495749
rs12343429	670463	AK3	-0.888286	0.374387	0.442886	0.657848	-0.522035	0.601646	0.377048	0.706138	0.00981516	0.992169	-0.640735	0.521695	1.83579	0.0663887	0.270743	0.786588	0.844877	0.39818	0.493198	0.621873
rs11739623	1400253	AC004041.2;RAD50	1.76401	0.0777306	2.1359	0.0326873	-1.74225	0.0814641	0.804899	0.420878	2.54974	0.0107803	2.37579	0.0175115	-0.284253	0.776216	1.39762	0.162227	-0.00662269	0.994716	1.23674	0.216182
rs209573	5550136	SMAP2	0.990753	0.321806	-0.285825	0.775012	0.023108	0.981564	-1.52667	0.126844	-0.070285	0.943967	0.0987814	0.921312	1.36492	0.172279	1.14372	0.252741	1.229	0.219072	-0.0803244	0.935979
rs9810890	4730685	RAB7A	-1.35717	0.174728	0.141614	0.887385	0.0158752	0.987334	-0.113019	0.910015	0.512689	0.608169	-1.22015	0.222408	0.585655	0.558107	-1.15229	0.249204	0.88289	0.377296	0.280045	0.779443
rs579459	4490687	RP11-326L24.7;RALGDS;GBGT1	-0.714558	0.474882	0.312413	0.754727	0.457351	0.647419	1.46203	0.143733	-0.897152	0.369638	-0.756022	0.449636	-0.259763	0.795046	-0.646105	0.518211	-0.819659	0.412411	-0.136762	0.891219
rs7258644	5490215	PRX	-1.1288	0.258983	-0.483657	0.628629	0.145461	0.884347	0.271434	0.786057	-0.748846	0.45395	-1.70413	0.0883562	1.7427	0.0813854	-0.860173	0.389694	-0.310179	0.756425	-0.59265	0.553416
rs12334347	1990753	-	-1.0151	0.310056	-0.875082	0.381529	0.940677	0.34687	0.0570803	0.954481	-1.57289	0.115745	-1.01042	0.312296	-0.0361956	0.971126	0.437651	0.661639	-0.201257	0.840497	0.595237	0.551685
rs2296743	6180133	ITPR3	0.0845221	0.932641	0.0976111	0.922241	-0.902732	0.366668	0.736793	0.461248	0.0507607	0.959516	0.339367	0.734333	1.12773	0.259433	0.923771	0.355606	0.385042	0.700206	1.67065	0.0947914
rs175719	6220195	BATF	0.740177	0.459192	0.515299	0.606344	-1.53029	0.125945	-1.26741	0.205009	0.748407	0.454215	0.85578	0.392119	0.0382428	0.969494	0.767691	0.442671	0.43277	0.665182	0.0529419	0.957778
rs4328821	4010196	GATA2	-0.785961	0.43189	0.637218	0.523983	1.0345	0.300902	0.569977	0.568693	0.692746	0.488469	0.009729	0.992238	0.0552697	0.955924	0.862614	0.38835	-0.307675	0.75833	0.255006	0.798718
rs4522758	4780433	RPL29	-0.233643	0.815262	-0.120659	0.903961	-0.632053	0.527352	0.0485966	0.961241	0.520012	0.603055	-0.406475	0.684394	1.88459	0.059485	0.414861	0.678244	1.84872	0.0644978	1.33285	0.18258
rs7631506	2350468	SENP7	0.336698	0.736344	1.70984	0.0872964	-1.67421	0.0940889	0.5473	0.584172	2.89323	0.00381296	1.46697	0.142385	0.846483	0.397283	-0.850023	0.395313	3.65548	0.000256698	2.8218	0.00477548
rs2188962	7050180	SLC22A5	-1.82682	0.0677262	1.18631	0.2355	-1.41387	0.157401	2.04014	0.0413369	0.373256	0.708958	-1.06548	0.286657	0.486789	0.626408	-0.383912	0.701044	0.0100009	0.992021	-0.691883	0.489011
rs6472235	6770348	MTFR1	-0.0412888	0.967066	0.530998	0.59542	-0.617496	0.536907	0.14092	0.887933	1.35263	0.176174	0.924002	0.355485	0.909993	0.362826	1.51711	0.12924	1.45707	0.145098	2.07237	0.0382306
rs3849942	7570022	C9orf72	-1.15007	0.250116	-0.95838	0.337871	0.910574	0.36252	-0.632995	0.526737	-0.31063	0.756082	-0.598752	0.549338	1.8552	0.0635671	-0.667762	0.504285	1.61387	0.106555	0.208767	0.83463
rs1712517	2320253	MIR1307;USMG5	2.26157	0.0237241	-6.46096	1.04042e-10	4.12651	3.68307e-05	-2.78038	0.00542957	-4.80324	1.56118e-06	-4.84995	1.23494e-06	3.03697	0.0023897	-4.74691	2.06552e-06	-0.895939	0.370285	-2.51024	0.0120648
rs17146964	6040497	-	0.845837	0.397644	-0.452112	0.651188	1.23921	0.215267	0.832481	0.405137	-1.08933	0.276009	0.372041	0.709863	-0.789305	0.429934	0.854737	0.392697	-1.71543	0.0862673	0.282149	0.77783
rs913678	20446	CEBPB	-0.265797	0.790396	-0.160342	0.872611	-0.114418	0.908906	0.192215	0.847574	0.296118	0.76714	-0.457653	0.647202	0.890952	0.372955	0.450305	0.65249	0.899327	0.368478	0.168917	0.865862
rs2756109	2230746	ABCC2	0.447864	0.654251	-0.777854	0.436655	0.432657	0.665264	-0.670071	0.502813	-0.925349	0.354784	-0.945288	0.344512	-0.724378	0.468834	-0.566851	0.570815	-0.673826	0.500422	-1.35484	0.175469
rs17149018	4730382	SLC26A5	1.17224	0.241102	-1.19237	0.233116	0.84905	0.395854	-0.755938	0.449686	0.463196	0.643224	1.30238	0.192785	-0.111092	0.911543	0.260009	0.794857	-0.136677	0.891286	-0.650878	0.515125
rs2247056	1440603	-	1.3582	0.174401	-0.497649	0.618732	1.15309	0.248872	-1.95124	0.0510287	-0.704709	0.480991	1.13389	0.256841	-0.293807	0.768905	-0.462895	0.64344	-0.214205	0.830387	0.231357	0.817037
rs1570342	2190743	RBM23	-2.36245	0.0181548	-0.935458	0.349552	0.291066	0.771001	-0.588404	0.556261	-1.1036	0.269769	-1.79036	0.0733961	2.51344	0.0119561	0.152225	0.879009	0.909627	0.363019	0.382861	0.701822
rs4870044	4640398	CCDC170	0.264796	0.791166	0.654308	0.512913	-0.319338	0.74947	2.23014	0.0257382	0.47321	0.636064	0.172031	0.863413	0.170399	0.864696	-0.209556	0.834015	-0.310393	0.756262	0.279272	0.780036
rs1541533	5490458	SNORD14A;RPS13	-1.5909	0.111632	4.00521	6.19631e-05	-2.64972	0.00805588	4.00902	6.09702e-05	5.93328	2.96942e-09	2.14255	0.0321494	5.31898	1.04351e-07	2.46817	0.0135804	7.01174	2.35373e-12	3.89554	9.79805e-05
rs6503457	1030706	-	0.665963	0.505435	0.61459	0.538825	0.986928	0.323678	0.779515	0.435676	1.26205	0.206931	1.54302	0.122825	0.284184	0.776269	0.384597	0.700536	0.966575	0.333757	1.00216	0.316266
rs1043063	5310397	LRRC25	1.09301	0.274391	2.21654	0.0266542	-1.96141	0.0498314	2.96034	0.00307297	0.597492	0.550179	-0.431027	0.666449	0.334449	0.73804	-0.345507	0.729713	0.154071	0.877554	2.73119	0.00631053
rs10995251	4480546	ADO	-0.423012	0.672286	1.28875	0.197486	-1.04876	0.29429	0.982245	0.325979	0.223263	0.823331	0.190237	0.849123	-1.30219	0.19285	0.69884	0.484652	-0.166278	0.867938	-0.200982	0.840712
rs11195940	620577	ACSL5	1.86984	0.0615064	-0.273333	0.784597	0.704757	0.480962	-0.944382	0.344974	2.40421	0.0162073	2.48194	0.0130669	1.5435	0.122708	2.03118	0.0422372	2.26239	0.0236731	3.22413	0.00126355
rs2604548	4830382	RP11-665G4.1;CPEB2	-0.0978307	0.922067	0.998832	0.317876	-0.653412	0.513491	1.2426	0.214016	2.03241	0.0421117	0.482515	0.62944	-0.46789	0.639863	-0.577177	0.56382	1.21547	0.224188	1.01651	0.309385
rs9277535	1450397	HSD17B8	1.53343	0.125171	0.680439	0.496227	-0.889211	0.37389	-1.33471	0.181972	0.6363	0.524581	-0.144159	0.885375	-0.736417	0.461477	0.59961	0.548766	-0.164316	0.869483	0.513123	0.607865
rs581623	4640553	KIR3DL1	-0.740714	0.458867	0.354813	0.722729	-2.4127	0.015835	1.4028	0.160677	3.28703	0.00101251	0.405242	0.6853	-0.153552	0.877963	1.58011	0.114083	1.48986	0.136262	0.0488734	0.96102
rs828860	6620689	-	-0.407501	0.68364	0.81888	0.412855	-0.175012	0.861071	-0.125567	0.900074	0.821933	0.411115	-0.614609	0.538813	-0.983416	0.325403	-0.174059	0.861819	-0.0795732	0.936577	0.120648	0.90397
rs1986661	1090561	GSTA1	-1.19937	0.230386	-0.618915	0.535972	1.60057	0.109472	-0.351291	0.72537	1.11342	0.265527	-0.729218	0.465868	2.34955	0.0187961	1.08116	0.279625	2.24429	0.0248139	1.66745	0.0954253
rs478607	3610743	SF1	0.566857	0.570811	-0.414465	0.678533	0.709292	0.478143	-0.529237	0.596641	-0.520825	0.602489	-0.289265	0.772379	1.27942	0.20075	0.384849	0.700349	0.336473	0.736514	1.9355	0.0529295
rs32674	840156	PAM	7.14045	9.30258e-13	-6.33923	2.30916e-10	3.13275	0.00173174	-4.09301	4.25811e-05	2.46259	0.0137939	4.23127	2.32375e-05	12.0564	1.79389e-33	3.79117	0.000149941	9.63314	5.79308e-22	10.3979	2.53582e-25
rs1004631	6980674	RP11-944L7.4	1.05926	0.289482	-0.419816	0.67462	-1.00091	0.316871	-0.336252	0.736681	0.694487	0.487377	-0.469848	0.638464	-0.880216	0.378742	1.21386	0.224799	-0.0838526	0.933174	0.258804	0.795786
rs174550	2360020	FADS2;FADS1	-0.725544	0.468118	1.66929	0.0950598	-1.74971	0.0801683	0.532968	0.594056	2.371	0.01774	0.700637	0.48353	1.15072	0.249847	0.959234	0.337441	1.87752	0.0604469	1.52454	0.127375
rs3747816	3190338	HDHD3	-1.74912	0.0802709	-0.187952	0.850914	-0.717363	0.47315	0.800691	0.423311	-2.1395	0.0323954	-2.46045	0.0138764	0.293383	0.769229	-2.05806	0.0395847	-0.872937	0.382697	-2.15734	0.030979
rs4246215	380224	FADS2	-0.05334	0.957461	0.49678	0.619344	-1.58239	0.11356	0.616195	0.537766	0.371044	0.710604	-0.565226	0.57192	0.0506117	0.959635	1.24941	0.211515	0.0668955	0.946665	0.308766	0.757499
rs6924995	4830424	MYLIP	0.366174	0.714235	0.17281	0.8628	-0.123476	0.90173	0.104915	0.916443	0.262692	0.792788	-0.875648	0.381221	-1.70032	0.0890702	-0.963642	0.335226	-0.956664	0.338737	-0.611676	0.540752
rs9298467	6040139	-	0.173345	0.86238	0.866985	0.38595	-0.368623	0.712409	0.923799	0.355591	0.411288	0.680861	0.515509	0.606198	0.321747	0.747644	-0.178897	0.858019	-0.0512647	0.959115	0.204937	0.837621
rs4434872	5670368	SLC39A1	-0.228063	0.819597	0.229644	0.818369	0.187593	0.851196	0.137536	0.890607	0.62915	0.529251	0.717862	0.472842	-0.806382	0.420023	-0.625162	0.531865	-0.263816	0.791922	-0.288211	0.773186
rs1896364	7210497	NUAK1	-1.7668	0.077261	-3.57695	0.000347624	2.73491	0.00623966	-1.89728	0.0577909	-2.10964	0.0348892	-2.30673	0.0210698	2.42581	0.0152744	-2.29431	0.0217726	1.25615	0.209062	-0.270161	0.787036
rs3213476	6520497	FOPNL	-0.360821	0.718233	0.979995	0.327089	-3.06639	0.00216659	1.45844	0.144718	1.67236	0.0944538	-0.389239	0.697099	0.372093	0.709823	0.485291	0.62747	0.946407	0.343941	-0.808002	0.419089
rs304270	4670458	RP11-112H10.4;SEPT4	0.21939	0.826347	-2.63543	0.00840317	1.60332	0.108863	-1.75416	0.0794032	-1.37191	0.170092	-0.624648	0.532202	0.597513	0.550165	0.665905	0.505472	-0.349734	0.726538	-1.15188	0.249369
rs507506	2360131	RP1-4G17.5;ELP5	0.00715171	0.994294	2.42133	0.0154636	-0.624282	0.532442	1.59816	0.110007	1.63068	0.102958	0.508223	0.611297	-1.91953	0.0549176	0.449059	0.653389	-0.805201	0.420704	-0.114226	0.909058
rs1551183	730671	ACAD8	5.81172	6.1836e-09	-3.33919	0.000840225	1.50677	0.131869	-2.58609	0.00970724	0.616271	0.537716	2.97522	0.00292782	1.59198	0.11139	0.892322	0.372221	0.777007	0.437154	3.11328	0.00185022
rs12703526	6370553	EPHA1	-0.618435	0.536288	0.0980231	0.921914	0.0981185	0.921838	-1.16095	0.245664	0.481187	0.630383	0.334519	0.737988	0.390133	0.696438	-1.24776	0.21212	0.359515	0.71921	-0.819133	0.41271
rs2728119	70161	PKD2	-0.33164	0.740161	1.22606	0.220176	-0.291943	0.77033	1.00383	0.31546	1.56656	0.117218	0.334218	0.738215	0.765763	0.443817	0.876164	0.380941	0.738312	0.460325	1.26299	0.206593
rs2269082	1980400	LIMK1	0.364283	0.715647	0.770599	0.440944	-1.40582	0.159777	0.97319	0.330459	0.788612	0.430339	0.580381	0.561657	-2.46732	0.013613	1.31403	0.188836	-1.15755	0.247048	0.617778	0.536722
rs236918	650678	TAGLN;PCSK7	0.266646	0.789742	-0.273158	0.784731	0.0380988	0.969609	0.885307	0.375991	-0.292276	0.770075	0.665643	0.505639	0.778824	0.436084	0.989471	0.322433	-0.455557	0.648709	0.179546	0.857509
rs2238378	5130332	ZNF213	1.26312	0.206545	0.716829	0.47348	0.673083	0.500895	0.843774	0.398796	0.944059	0.34514	1.35388	0.175775	3.17341	0.00150659	2.57316	0.0100775	2.54109	0.0110508	3.98426	6.76896e-05
rs7249323	3870390	CACNA1A	-0.20798	0.835245	-0.834753	0.403857	0.925868	0.354515	-0.972131	0.330985	-0.705403	0.48056	0.395772	0.692274	2.26297	0.0236378	-0.265217	0.790843	0.430727	0.666667	0.220442	0.825527
rs11248850	6250553	ITFG3	-0.0968578	0.922839	0.0162028	0.987073	1.11588	0.264475	-1.21697	0.223616	-0.414936	0.678189	0.304704	0.760592	-1.67173	0.0945783	-0.658298	0.510347	-1.60217	0.109118	-0.897226	0.369598
rs4983413	5340246	CRIP2	-1.42157	0.155152	0.479614	0.631502	-1.19466	0.232218	0.605242	0.545018	0.462029	0.64406	-1.10593	0.268756	0.348874	0.727184	-1.10092	0.270932	0.706279	0.480015	-0.495971	0.619915
rs9900972	7160612	USP36	1.32187	0.186211	1.50217	0.133052	0.00983144	0.992156	1.02329	0.306171	0.323378	0.746409	1.33953	0.180398	-0.587002	0.557203	1.5465	0.121984	-0.743125	0.457406	0.014315	0.988579
rs17192677	1690053	CTD-2514K5.4;TTYH2	0.223219	0.823365	-0.460709	0.645007	0.989113	0.322608	-0.90435	0.36581	-0.636433	0.524495	-0.989088	0.32262	-0.172012	0.863428	0.657215	0.511042	-1.11152	0.266343	0.494006	0.621302
rs11648796	6900431	MSLN;HAGHL	-0.327659	0.74317	-1.08767	0.276743	0.517904	0.604525	1.09747	0.272435	-0.250245	0.802398	-0.653084	0.513702	0.432619	0.665292	-1.38619	0.165689	0.497067	0.619142	-0.619309	0.535713
rs4762210	1820324	APAF1;ANKS1B	2.33187	0.0197074	0.717694	0.472946	0.699233	0.484406	0.379074	0.704633	3.17344	0.00150644	2.02261	0.043113	-0.125442	0.900174	2.15549	0.0311239	1.19288	0.232917	3.10346	0.00191272
rs10824026	110561	NDST2	-0.0621487	0.950444	-0.54013	0.589107	0.637741	0.523642	-2.03491	0.0418599	0.707199	0.479443	0.299681	0.76442	-0.956894	0.338621	-1.0341	0.301088	0.118929	0.905332	-0.30861	0.757618
rs9394159	3120707	CUTA	-2.06811	0.0386293	0.149469	0.881184	0.257792	0.796567	0.144763	0.884898	-0.485384	0.627404	-1.69199	0.0906488	-0.99376	0.32034	-0.951081	0.341563	-0.337692	0.735596	-0.475512	0.634422
rs10466829	2570132	CLEC2D	-0.409117	0.682454	0.245655	0.805949	0.475635	0.634334	0.203826	0.838489	1.24547	0.212958	-1.27638	0.201821	0.433909	0.664355	-0.997865	0.318345	1.86317	0.062438	-0.557809	0.576975
rs16856186	1450753	NUCKS1	-0.662364	0.507738	-1.12958	0.258655	-0.510641	0.609603	-0.977572	0.328286	-0.282889	0.777262	-0.95147	0.341366	2.22587	0.0260232	0.172124	0.86334	1.85001	0.0643123	1.12854	0.259092
rs159146	6940242	BRPF1	1.05811	0.290006	-0.226095	0.821128	-0.490343	0.623891	-0.765736	0.443834	0.415696	0.677632	0.974306	0.329905	1.04102	0.297865	-0.553513	0.579912	0.976671	0.328732	0.0228075	0.981804
rs630055	6180253	CDC42EP2	0.254835	0.79885	-0.958765	0.337677	0.0772445	0.938429	-0.637315	0.52392	0.574072	0.565919	-0.0514962	0.95893	2.01235	0.0441832	-0.264015	0.791768	1.30551	0.191719	1.87029	0.0614437
rs2336724	3940368	MUSTN1;TMEM110-MUSTN1	-1.9168	0.0552639	-1.65255	0.098423	0.635325	0.525216	0.473172	0.636091	-0.662652	0.507554	-1.34149	0.179763	2.43614	0.0148448	-0.85164	0.394414	0.605176	0.545062	-1.30018	0.193538
rs2076087	5420259	CDC42EP1	-0.055123	0.95604	-1.5822	0.113603	-0.339272	0.734405	-1.23347	0.2174	-0.529543	0.596429	0.220829	0.825225	0.360141	0.718742	-0.161217	0.871923	-0.13939	0.889142	0.246446	0.805337
rs17767225	7050626	RP1-292L20.1;PCNX	0.368372	0.712596	0.486751	0.626435	0.385121	0.700148	-1.21608	0.223955	0.458726	0.646431	0.0471507	0.962393	-0.189531	0.849677	-1.0751	0.282329	0.518542	0.60408	0.178729	0.85815
rs4794822	5390608	GSDMB	0.382768	0.701892	-1.3988	0.161872	1.23629	0.216351	0.290072	0.771761	-0.129918	0.896631	-0.185834	0.852575	2.60385	0.00921834	1.0358	0.300297	1.27793	0.201275	1.36748	0.171475
rs11666267	5870274	-	-0.74572	0.455837	-0.587042	0.557176	-0.248774	0.803536	0.725153	0.468358	0.344843	0.730212	-0.508735	0.610938	0.450039	0.652682	-0.169724	0.865228	1.11871	0.263264	0.784847	0.432543
rs10749291	730092	SFXN4	2.34764	0.018893	2.5181	0.0117988	-1.06135	0.288532	1.21947	0.222666	4.03955	5.35535e-05	3.15958	0.00157999	2.17863	0.0293595	2.03145	0.0422094	3.09478	0.0019696	4.39653	1.09995e-05
rs854572	3140390	PON2	0.744961	0.456295	-0.823549	0.410196	-0.113269	0.909817	-0.235692	0.813672	-1.16521	0.243936	-2.1144	0.0344808	-1.11374	0.265389	-1.10011	0.271285	-1.06735	0.285812	-0.714867	0.474691
rs6428370	3360279	CFH	0.454155	0.649717	-0.184778	0.853403	-0.11541	0.90812	0.346081	0.729282	0.0849732	0.932283	1.45514	0.14563	-0.169096	0.865721	0.384925	0.700293	0.618889	0.53599	-0.38766	0.698267
rs12537284	2230431	IRF5	1.08785	0.27666	0.897564	0.369418	-1.30141	0.193117	1.49714	0.134356	1.04879	0.294275	1.56714	0.117083	-2.23967	0.0251121	0.710788	0.477215	-1.30807	0.190848	0.479135	0.631842
rs8057931	840053	SNTB2	2.822	0.00477256	-0.0634546	0.949405	1.17047	0.241814	-0.0545905	0.956465	2.28608	0.0222498	3.00945	0.00261717	1.65486	0.0979524	2.52591	0.0115399	2.3771	0.0174494	3.83771	0.000124187
rs9272219	270168	HLA-DRA	1.38923	0.164762	0.0536443	0.957219	-0.0749961	0.940218	0.532268	0.59454	0.474464	0.635169	0.659131	0.509811	-0.722122	0.47022	-0.900698	0.367749	-0.635933	0.52482	1.05449	0.29166
rs11048980	2760653	STK38L	-1.62819	0.103484	2.57931	0.00989983	-1.43413	0.151535	2.7178	0.00657185	1.1283	0.259194	-0.242051	0.808741	-1.69919	0.0892837	-2.35047	0.0187497	-0.471413	0.637346	-1.12571	0.26029
rs7423615	5870184	SP110	0.579449	0.562287	-0.0779962	0.937831	-0.364242	0.715677	0.0677002	0.946024	0.0810116	0.935433	0.181592	0.855903	-0.0872912	0.93044	0.86941	0.384623	-0.340536	0.733453	0.703945	0.481467
rs2107238	1660681	CCDC102A	-0.0598024	0.952313	1.06766	0.285675	0.132665	0.894458	1.4972	0.134342	1.09769	0.27234	0.148115	0.882252	-0.66819	0.504012	0.79093	0.428985	0.483215	0.628943	0.756549	0.44932
rs1169310	50414	HNF1A;C12orf43	1.09448	0.273744	0.117773	0.906248	0.255185	0.79858	0.662134	0.507885	0.768772	0.442029	1.15296	0.248925	1.54493	0.122362	1.11678	0.264088	2.34265	0.0191471	2.18809	0.028663
rs720774	2340451	AP2B1	-1.78291	0.0746012	2.16818	0.0301446	-1.28675	0.19818	2.51641	0.0118557	2.56096	0.0104383	2.27312	0.0230189	0.492842	0.622124	0.0494963	0.960524	2.2844	0.022348	2.60343	0.00922965
rs12123609	7210092	TRIT1	0.102125	0.918658	0.0767362	0.938833	0.320524	0.748571	0.33864	0.734881	1.74391	0.0811741	0.877253	0.380349	3.76353	0.000167534	1.40086	0.161256	4.58524	4.53467e-06	2.47968	0.0131499
rs10020051	5560139	RAP1GDS1	0.104185	0.917023	-0.964864	0.334613	-0.0664336	0.947033	-0.567411	0.570435	1.07365	0.282981	1.08685	0.277105	1.94537	0.0517302	1.32413	0.185459	2.20465	0.0274788	3.43832	0.000585339
rs1678542	3130102	TSFM	-0.605389	0.544921	-0.46803	0.639763	1.2579	0.208428	-0.808862	0.418594	-1.97686	0.0480574	-0.727204	0.467101	1.27228	0.203274	-1.01893	0.308236	-0.636086	0.52472	-0.881433	0.378083
rs11078927	1500112	ORMDL3	-2.06479	0.0389433	0.713226	0.475706	-0.306625	0.759129	0.902404	0.366843	0.720689	0.471101	-1.41866	0.155999	0.627713	0.530192	-0.0194265	0.984501	1.62667	0.103807	-0.380165	0.703823
rs1227002	1410114	PID1	0.470063	0.63831	1.20608	0.227786	-0.7762	0.437631	1.6706	0.0948008	1.1816	0.237363	0.562806	0.573567	-1.01313	0.310998	1.43686	0.150757	-0.0766924	0.938868	0.796698	0.425626
rs7908979	6620292	CDH23;C10orf54	0.946808	0.343737	-0.135811	0.89197	0.66591	0.505469	0.804456	0.421134	-1.53591	0.124561	-0.239035	0.811078	-1.05385	0.29195	-0.164542	0.869305	-1.789	0.0736149	-1.34632	0.178199
rs4255023	2810326	WBSCR27	-2.2688	0.0232806	1.37857	0.168027	-0.536105	0.591886	1.67959	0.0930369	2.73969	0.00614968	-0.142842	0.886415	3.80308	0.000142911	1.66311	0.0962902	5.02728	4.97496e-07	3.32974	0.000869272
rs10206899	5130736	ALMS1	1.81827	0.0690229	-1.43036	0.152614	0.546748	0.584552	-1.10426	0.269479	0.118251	0.905869	0.474881	0.634872	1.22105	0.222067	2.12596	0.0335069	-0.345442	0.729762	2.5704	0.0101582
rs4924935	290112	PRPSAP2	-0.917711	0.35877	-0.286175	0.774744	1.26498	0.205879	-1.02137	0.30708	-0.31476	0.752944	-1.21592	0.224016	-1.00835	0.313286	0.624162	0.532521	-0.828931	0.407143	-1.26817	0.204739
rs2041342	770754	TTYH3	-1.96569	0.0493339	0.973662	0.330224	0.0590542	0.952909	0.3831	0.701646	-0.912424	0.361546	-1.18522	0.23593	0.00270642	0.997841	-0.686765	0.492231	-1.31469	0.188616	-1.65057	0.0988269
rs1615007	990129	KIAA0586	-0.934604	0.349992	1.65242	0.0984498	-0.956493	0.338823	-0.241005	0.809551	0.405226	0.685311	-0.979154	0.327504	0.366708	0.713837	-0.727231	0.467085	0.684902	0.493406	-0.120528	0.904065
rs1150754	5560541	SKIV2L	-0.276286	0.782328	-0.377708	0.705648	0.305374	0.760081	0.332987	0.739144	0.284551	0.775988	-1.13651	0.255742	2.07578	0.0379147	-0.373687	0.708637	2.14954	0.0315918	1.6397	0.101067
rs9937837	4490500	ITGAX	0.983112	0.325552	-1.21711	0.223563	0.661382	0.508367	-0.894317	0.371152	-0.116366	0.907363	0.778252	0.43642	1.42395	0.15446	1.77199	0.0763969	0.678791	0.49727	1.52329	0.127686
rs1543115	5080280	SEMA4B	0.450866	0.652086	1.30353	0.192393	-1.10795	0.267881	1.13573	0.25607	1.38386	0.166401	0.795654	0.426233	-1.11015	0.266933	1.04781	0.294727	-0.776634	0.437374	-0.0540362	0.956906
rs7124336	2470367	INPPL1	1.02588	0.304949	-1.12209	0.261824	1.35997	0.173839	0.710312	0.477511	-1.65084	0.0987703	-0.626675	0.530873	-0.529486	0.596468	0.740257	0.459144	-0.496207	0.619748	0.0294587	0.976499
rs7510868	10673	PLXNB2	0.0747997	0.940374	1.66057	0.0967998	-0.750315	0.453065	0.802076	0.422509	-0.143936	0.885551	0.33036	0.741128	-1.34012	0.180207	-0.216392	0.828682	-1.70219	0.0887202	-1.31669	0.187943
rs405729	130561	GSTA4	0.918766	0.358218	0.741571	0.458347	-0.729336	0.465796	0.14223	0.886898	0.00112526	0.999102	-0.29816	0.765581	-1.39245	0.163788	0.365321	0.714872	-0.332338	0.739634	-1.85057	0.0642312
rs4538475	450114	FBXL5	0.73734	0.460916	-0.0952239	0.924137	-0.155193	0.87667	-1.68265	0.092442	1.34071	0.180015	1.25882	0.208097	0.909531	0.36307	2.24553	0.0247344	3.00293	0.00267398	2.244	0.0248323
rs8074016	7610129	RAD51C	1.23441	0.217049	1.81903	0.0689063	-0.657398	0.510925	1.37363	0.169556	1.98094	0.0475977	0.567893	0.570108	0.764001	0.444866	3.37742	0.000731689	0.570852	0.5681	4.23231	2.31298e-05
rs198846	7210333	-	1.37409	0.169413	-0.25762	0.7967	1.12471	0.260712	-0.625849	0.531414	1.79142	0.0732257	1.88458	0.0594861	2.27134	0.0231266	1.3656	0.172065	2.91309	0.00357873	3.02703	0.00246969
rs2925142	3780239	ATPAF2	2.2043	0.027503	1.99167	0.0464077	-2.20666	0.0273381	0.414755	0.678322	2.44453	0.0145043	1.89432	0.0581828	-1.39841	0.161991	0.86277	0.388264	0.597478	0.550189	0.492603	0.622293
rs4389526	10685	ANTXR2	-0.289911	0.771884	2.76268	0.00573283	-2.47808	0.0132091	1.07967	0.280291	1.46667	0.142465	0.753232	0.451311	-0.741277	0.458526	0.418	0.675947	-0.335917	0.736934	-1.27369	0.202773
rs4733930	2850646	BAG4	-0.0206842	0.983498	-0.401689	0.687913	0.0742442	0.940816	-0.646021	0.518266	0.0940549	0.925066	-0.209261	0.834244	0.795643	0.42624	0.985388	0.324433	0.315762	0.752183	1.45493	0.14569
rs4938642	1230639	TRAPPC4	-0.213169	0.831195	0.454622	0.649381	-1.19443	0.232308	0.425426	0.670526	-0.0632975	0.94953	-0.132858	0.894306	-1.56586	0.117381	0.810011	0.417934	-1.28605	0.198425	-0.679631	0.496738
rs174601	2360020	FADS2;FADS1	-0.853834	0.393197	1.71887	0.0856375	-1.81836	0.0690091	0.381768	0.702633	2.24213	0.0249529	0.449244	0.653255	0.965701	0.334194	0.534474	0.593013	1.52438	0.127415	1.432	0.152144
rs17095355	1990468	ADD3	0.441196	0.659071	-0.762479	0.445774	-0.230908	0.817386	-0.49795	0.618519	0.200108	0.841396	0.0135121	0.989219	2.3534	0.0186025	1.65544	0.0978362	1.63336	0.102393	2.6424	0.00823216
rs6597993	510093	DEAF1;RP11-754B17.1	-0.304461	0.760777	1.4717	0.141102	-1.31037	0.190071	2.18821	0.0286543	1.92199	0.0546066	1.04982	0.2938	0.229245	0.818678	-0.739522	0.45959	1.01122	0.311911	0.850988	0.394776
rs4891871	4260372	RP11-433A23.1	-0.524473	0.599949	1.04134	0.297719	-0.675235	0.499527	0.432509	0.665372	0.528494	0.597157	0.28391	0.776479	0.509283	0.610554	0.336123	0.736778	0.0539654	0.956963	0.221553	0.824662
rs4925386	4040176	LAMA5	0.57884	0.562697	0.421326	0.673517	-0.591677	0.554067	2.46408	0.0137365	0.324415	0.745624	0.0216906	0.982695	-0.398496	0.690264	1.50765	0.131644	-1.05491	0.291468	-0.351242	0.725407
rs2645424	2360630	FDFT1	0.34683	0.728719	-0.138507	0.889839	-0.226434	0.820864	0.298559	0.765277	1.25792	0.20842	1.13406	0.256769	0.390476	0.696185	1.516	0.129519	1.18988	0.234094	1.16388	0.244472
rs7311267	4880193	KLRG1	-0.521654	0.601912	2.58452	0.00975146	-0.488377	0.625283	1.6267	0.1038	2.28427	0.0223558	0.880189	0.378757	0.146381	0.883621	0.618955	0.535946	0.989087	0.322621	0.876248	0.380895
rs2241908	1780678	TMEM223;TMEM179B	0.893911	0.37137	0.601145	0.547743	-0.628812	0.529472	-0.0677137	0.946014	-0.832986	0.404853	1.0116	0.311729	-0.149675	0.881021	1.64464	0.100043	-1.81337	0.0697741	-0.227123	0.820328
rs11024102	5490458	SNORD14A;RPS13	0.342311	0.732117	-0.975114	0.329504	2.27001	0.023207	0.398212	0.690474	-0.423601	0.671857	0.595761	0.551335	2.27585	0.022855	-0.817008	0.413924	1.1699	0.24204	0.130032	0.896541
rs3815148	4040630	COG5	1.10161	0.270631	0.270536	0.786748	0.923002	0.356006	-0.240328	0.810076	1.78771	0.0738223	1.53685	0.12433	-0.16604	0.868125	1.60017	0.109562	1.33398	0.18221	2.3219	0.0202385
rs8067378	5390608	GSDMB	-0.542662	0.587363	1.00087	0.316888	-0.451789	0.651421	2.13281	0.0329401	1.71112	0.0870589	-0.38484	0.700356	4.91841	8.72515e-07	0.476384	0.633801	3.7004	0.000215263	3.88722	0.0001014
rs7047865	1740343	PCSK5	-0.672966	0.500969	0.667421	0.504503	-0.0785531	0.937388	-0.912032	0.361752	1.27827	0.201154	0.102911	0.918033	0.983762	0.325232	0.679216	0.497001	1.94574	0.0516866	1.07459	0.282556
rs174583	380224	FADS2	-0.00537442	0.995712	0.546501	0.584722	-1.43922	0.150088	0.631159	0.527937	0.287268	0.773907	-0.67318	0.500833	-0.195806	0.844762	1.29108	0.196675	-0.163669	0.869992	0.173697	0.862104
rs1975306	5290215	CLASP1	1.03733	0.299584	-0.0152818	0.987807	1.02578	0.304993	-0.125134	0.900417	0.0911294	0.92739	0.56611	0.571319	-3.32659	0.000879158	0.240676	0.809806	-2.81327	0.00490408	-0.215783	0.829157
rs9298464	3290187	PCMTD1;AC090186.1	0.647448	0.517342	-0.389295	0.697058	0.849907	0.395377	1.19132	0.233529	-0.437489	0.661757	-0.0139405	0.988877	0.475222	0.634629	0.674013	0.500303	0.294584	0.768311	0.778254	0.436419
rs4942593	1340682	-	0.776487	0.437461	-0.585272	0.558365	0.314267	0.753318	-0.801944	0.422585	0.496541	0.619513	0.42507	0.670786	0.496549	0.619507	-1.31367	0.188958	1.12058	0.262468	0.199945	0.841524
rs11764840	6940288	-	0.447261	0.654687	1.16316	0.244764	-2.46809	0.0135837	0.168782	0.865968	1.57254	0.115825	1.05584	0.291041	1.78981	0.0734843	0.0565892	0.954872	2.09785	0.0359187	1.42218	0.154973
rs2431697	1510291	PTTG1	-0.99989	0.317364	0.536045	0.591928	-0.645605	0.518535	-1.82423	0.0681181	1.3348	0.181941	0.309422	0.757001	-0.116393	0.907341	1.84966	0.0643624	1.44752	0.147751	-0.372629	0.709424
rs7455225	1940068	ABHD11	1.22742	0.219665	-0.420841	0.673871	-0.750171	0.453152	-1.12936	0.258745	0.353862	0.723442	1.57414	0.115456	0.989412	0.322462	2.22805	0.0258772	1.22785	0.219502	1.28661	0.198232
rs10852795	6330091	CD7	-0.843212	0.39911	0.659493	0.509579	0.447994	0.654157	0.291232	0.770874	1.33696	0.181235	0.247048	0.804871	-0.983278	0.325471	-0.208215	0.835061	0.640073	0.522125	0.0472852	0.962286
rs4747241	3190148	DDIT4	1.29638	0.194844	-0.681816	0.495356	1.47167	0.141111	-0.967139	0.333474	-0.66884	0.503598	0.151713	0.879413	-0.661352	0.508386	-0.243449	0.807658	-0.459586	0.645814	1.23833	0.215595
rs1789110	3780681	MBP	-1.5727	0.115788	0.577434	0.563647	1.0019	0.316393	-0.514283	0.607054	0.715005	0.474606	-0.903264	0.366386	0.58603	0.557856	-0.229053	0.818828	1.82518	0.0679738	0.0412767	0.967075
rs1543474	1340176	C20orf197	2.96469	0.00302987	2.29408	0.0217857	-1.80137	0.0716441	0.703813	0.481549	4.69688	2.64161e-06	5.06265	4.13478e-07	-1.59022	0.111785	1.25278	0.210285	1.29742	0.194487	2.34516	0.019019
rs326341	4150193	CD47	1.934	0.0531125	2.65985	0.00781762	-0.00780109	0.993776	1.2012	0.229672	3.38653	0.000707834	2.45978	0.0139024	-1.82341	0.0682413	0.409762	0.68198	-0.786078	0.431822	1.06591	0.286466
rs11084710	730458	LRP3	0.803332	0.421783	-1.46155	0.143864	0.845772	0.39768	-1.31259	0.18932	-0.426918	0.669439	0.51117	0.609232	-0.914605	0.360399	-0.770583	0.440954	-0.796729	0.425608	0.278347	0.780746
rs8120495	5960736	OVOL2;C20orf72	1.3151	0.188477	1.77978	0.0751122	-1.5225	0.127883	0.726575	0.467486	2.9401	0.00328102	2.3874	0.0169678	0.149406	0.881234	2.41211	0.0158605	1.57518	0.115215	2.78607	0.00533506
rs2349729	50348	TMEM237	0.124518	0.900906	-1.32482	0.185231	1.05432	0.291736	-0.688443	0.491174	-1.58987	0.111865	-1.65995	0.0969249	1.6132	0.106702	0.225487	0.8216	-0.071053	0.943356	1.52164	0.128099
rs891017	2760259	USHBP1;BABAM1;CTD-2278I10.6	0.680527	0.496171	-1.12113	0.262232	2.61126	0.00902083	-0.993273	0.320577	-0.098181	0.921789	1.32214	0.186123	-0.172961	0.862682	1.18394	0.236437	0.0867868	0.930841	0.537595	0.590857
rs3828003	1570414	NAA20	-0.254022	0.799479	0.173342	0.862382	1.00254	0.316085	-0.483228	0.628934	0.320938	0.748258	0.63989	0.522244	-0.175258	0.860877	-0.961707	0.336197	-0.37536	0.707393	-0.250411	0.80227
rs12268619	1300274	ANXA11	-1.02263	0.306485	0.074512	0.940603	0.382882	0.701807	2.20299	0.0275952	-0.635845	0.524877	-0.798054	0.424839	0.156877	0.875342	0.0959513	0.923559	-0.989752	0.322295	-0.180892	0.856453
rs12982744	4210612	AP3D1	0.494634	0.620858	-1.62164	0.10488	2.33585	0.0194989	-0.54969	0.582532	-1.83877	0.0659491	-0.778718	0.436146	-1.02323	0.306198	0.2781	0.780936	-1.85588	0.06347	-1.13393	0.256823
rs1838080	6650161	GNA13	-0.975257	0.329433	-0.331444	0.740309	-0.227372	0.820135	1.45327	0.146149	1.12196	0.261878	-0.871123	0.383687	1.63571	0.1019	-0.670472	0.502557	2.02853	0.0425065	0.642276	0.520694
rs12672423	6380138	WASL	-0.414751	0.678324	0.469949	0.638391	-0.585786	0.55802	-0.568005	0.570031	-0.017021	0.98642	-1.09734	0.272492	-0.215011	0.829759	-0.0601366	0.952047	-1.0984	0.272028	-1.96536	0.0493728
rs6726451	1240762	RMND5A	0.155675	0.876289	-1.27938	0.200765	1.06154	0.288444	0.237026	0.812636	0.286737	0.774314	0.277046	0.781745	-0.464041	0.642619	-0.442892	0.657844	0.28312	0.777085	-0.227533	0.820009
rs12235416	7380706	NINJ1	-0.109152	0.913082	1.01571	0.309766	-1.85616	0.063431	1.27083	0.203789	2.02667	0.0426963	-1.05626	0.290851	1.53474	0.124847	-1.53351	0.125151	2.19507	0.0281584	1.75801	0.078746
rs2462043	1470025	TRIM69	-0.525212	0.599436	0.112124	0.910725	0.0478339	0.961849	0.206471	0.836423	-0.129369	0.897066	-0.392577	0.694632	1.10506	0.269135	-0.256831	0.797309	-0.0661621	0.947249	0.36203	0.717329
rs10946808	6200669	HIST1H2BD	2.19637	0.0280652	-1.14429	0.252503	1.02022	0.307623	0.860661	0.389425	-0.189495	0.849705	0.820332	0.412027	1.24621	0.212687	0.31761	0.750781	0.10099	0.919558	2.19765	0.0279742
rs3741060	6110301	KDELC2	1.77591	0.0757477	1.70839	0.0875636	-0.434718	0.663767	2.66079	0.00779571	3.44515	0.000570749	2.51454	0.0119188	0.661219	0.508472	1.51505	0.129761	2.11179	0.0347041	3.1848	0.00144854
rs11204735	2640338	ARNT	2.29793	0.021566	0.523434	0.600673	-1.18159	0.237369	0.848167	0.396345	0.468227	0.639622	1.5878	0.112332	-1.27429	0.202559	1.88593	0.0593041	-0.977855	0.328146	0.977697	0.328224
rs10896135	4490044	PC;LRFN4	-0.941005	0.346702	0.489446	0.624526	-0.0670664	0.946529	1.17246	0.241013	0.146369	0.88363	-0.664156	0.50659	0.0175266	0.986017	-1.37036	0.170574	0.398432	0.690311	0.738096	0.460456
rs9609565	4780048	FBXO7	-0.219329	0.826394	-0.938473	0.348001	1.27016	0.204026	-0.595516	0.551498	-0.726181	0.467728	-0.419922	0.674542	0.46308	0.643307	0.169489	0.865412	0.443178	0.657637	0.0659782	0.947395
rs11753569	1990563	MPC1	1.57734	0.114718	-0.110269	0.912196	0.172916	0.862718	-0.306477	0.759241	-0.376986	0.706184	1.18851	0.234633	0.824524	0.409642	1.51937	0.12867	-0.2152	0.829612	1.43649	0.150864
rs9272535	2570564	HLA-DRA	0.531027	0.5954	-0.250583	0.802137	-1.38833	0.165038	-0.152722	0.878618	-0.24868	0.803608	-0.0548051	0.956294	-0.80942	0.418274	-0.356687	0.721326	-2.38369	0.0171398	0.205987	0.836801
rs1504749	4280025	-	2.32697	0.0199668	-1.61016	0.107364	2.23418	0.025471	-0.696174	0.48632	-0.427362	0.669116	1.42936	0.152899	-0.307238	0.758662	1.56562	0.117436	-0.792843	0.427869	1.55069	0.120975
rs7192417	5360154	-	0.717546	0.473037	0.592841	0.553288	-0.818881	0.412855	0.60095	0.547873	1.31791	0.187534	1.01879	0.308302	-0.673994	0.500315	0.672572	0.50122	0.404161	0.686094	1.14829	0.250851
rs7204765	1260315	RP11-77H9.2;PMM2	1.12295	0.261457	0.297667	0.765957	-0.1001	0.920265	1.20675	0.227527	-0.848595	0.396107	0.23495	0.814248	-0.550174	0.5822	-0.625031	0.531951	-1.16357	0.2446	-1.0843	0.278232
rs4463696	2470240	THEMIS2	1.24417	0.213438	-1.54133	0.123236	0.719913	0.471579	-1.71349	0.0866219	-0.42638	0.669831	-0.537244	0.591099	0.465751	0.641394	0.909938	0.362855	0.754235	0.450708	0.343011	0.73159
rs1719271	3990546	AC069368.3;PLEKHO2	0.863352	0.387944	-1.18498	0.236026	1.81884	0.0689353	0.962035	0.336032	-1.68377	0.0922254	0.813084	0.41617	-0.460269	0.645323	-0.547692	0.583903	-1.6807	0.0928219	-1.0329	0.301648
rs1371614	830176	C2orf18;CENPA	0.940191	0.347119	0.0246851	0.980306	-0.752451	0.45178	-0.724787	0.468583	0.613297	0.53968	1.11926	0.26303	0.561607	0.574384	0.0848461	0.932384	1.00847	0.313229	0.917481	0.358891
rs11710163	360753	MKRN2	0.807648	0.419293	1.32964	0.183637	-0.296221	0.767062	0.391726	0.695261	1.01316	0.310984	1.0325	0.301837	0.841558	0.400036	1.19842	0.230755	1.55122	0.120848	1.34578	0.178373
rs4953037	6380064	LRPPRC	-0.862634	0.388339	-0.00881808	0.992964	0.155406	0.876501	0.241208	0.809394	-1.81158	0.0700518	-1.84929	0.0644153	-1.77273	0.0762735	-0.128009	0.898142	-1.48364	0.137904	-1.30559	0.191691
rs6457620	2650156	TAP2	0.182049	0.855544	0.154418	0.87728	-0.676262	0.498875	0.434728	0.66376	0.320024	0.74895	-0.665705	0.5056	0.204309	0.838112	-0.745167	0.456171	-0.174042	0.861832	-0.429086	0.667861
rs228754	4280661	TMUB2	0.664248	0.506531	3.70887	0.000208185	-0.584579	0.558831	3.01357	0.0025819	1.85322	0.063851	2.06039	0.0393613	-4.01684	5.89835e-05	0.280518	0.77908	-3.66941	0.000243111	-1.11558	0.264603
rs749174	830047	GSTP1	-1.9111	0.055992	-1.67624	0.0936904	-0.922752	0.356137	-0.910044	0.362799	-2.2176	0.0265819	-1.10238	0.270298	3.07564	0.0021005	-0.735851	0.461821	0.275157	0.783196	-0.329934	0.74145
rs7824557	4010184	C8orf12;FAM167A	-1.03546	0.300456	1.62406	0.104362	-1.14445	0.252436	2.73619	0.00621553	0.595935	0.551219	-0.328236	0.742733	0.321376	0.747926	0.694302	0.487493	0.270255	0.786964	0.000430015	0.999657
rs1529102	3450092	PELI1	-0.42304	0.672266	1.63534	0.101978	0.156221	0.875858	1.89857	0.0576207	0.266288	0.790017	0.196222	0.844437	-0.105863	0.915691	0.613481	0.539559	-0.606605	0.544113	-0.38764	0.698282
rs11597086	240097	RP11-316M21.6;CWF19L1	0.971011	0.331543	0.73913	0.459828	-0.095072	0.924258	0.216675	0.828461	2.45883	0.0139392	1.82418	0.0681256	-0.265691	0.790477	2.90037	0.00372726	0.194255	0.845976	1.73696	0.0823943
rs1482184	840204	HAS2	0.192308	0.847501	-0.851362	0.394568	1.18869	0.234563	-0.201795	0.840077	-1.07899	0.280594	-0.228587	0.81919	0.0552196	0.955963	0.795042	0.426589	-0.250794	0.801974	0.496784	0.619342
rs2261092	5490390	ZGPAT;LIME1	-0.609709	0.542055	0.880546	0.378563	0.340587	0.733414	1.53677	0.124349	0.792505	0.428066	0.650715	0.515231	0.792995	0.427781	0.851466	0.394511	1.09843	0.272019	0.0782321	0.937643
rs4345897	1030278	PYROXD2	-0.227739	0.819849	-1.23365	0.217332	1.31349	0.189018	-0.917383	0.358942	-1.35872	0.174237	-0.0805828	0.935774	-0.0540744	0.956876	-0.497497	0.618839	-0.964475	0.334808	0.405376	0.685201
rs12651276	5570278	RP11-630D6.5;CXCL9	0.547462	0.584061	0.759765	0.447395	-0.285238	0.775462	-0.178201	0.858565	1.90092	0.0573124	1.00724	0.31382	-0.181378	0.856071	-0.665238	0.505898	0.834067	0.404243	-0.116624	0.907158
rs1671022	4280468	LLGL2	-0.310017	0.756548	0.560645	0.57504	0.0125511	0.989986	-0.453469	0.650211	-0.151352	0.879698	-0.015374	0.987734	-0.190992	0.848532	0.678682	0.49734	-0.510057	0.610012	-0.384101	0.700904
rs10797062	3610228	PEA15	-0.994179	0.320136	-0.215957	0.829022	0.493871	0.621398	0.296817	0.766606	-0.764368	0.444648	-0.67143	0.501946	0.94133	0.346536	-1.47864	0.139237	-0.124601	0.900839	0.0999491	0.920385
rs4800148	6580672	RBBP8	0.753382	0.45122	1.02153	0.307001	1.60066	0.109453	0.685627	0.492949	0.595486	0.551519	1.07539	0.282199	-0.625226	0.531823	-1.35084	0.176748	0.274916	0.783381	0.957773	0.338177
rs2842992	2340026	MRPL18	2.33465	0.0195619	0.0823322	0.934383	0.174978	0.861097	0.0201882	0.983893	1.51121	0.130735	2.12026	0.0339843	-0.666915	0.504826	1.82583	0.0678753	-0.396312	0.691875	1.68301	0.0923731
rs7957197	2060605	P2RX4	-0.107339	0.91452	1.23905	0.215328	-1.67505	0.0939248	1.61789	0.105687	1.8309	0.0671154	1.25219	0.2105	0.204902	0.837649	0.754746	0.450401	0.270613	0.786689	1.77974	0.0751182
rs229526	110382	Z82188.1;RAC2	0.613997	0.539217	-0.505346	0.613316	0.243738	0.807434	-1.47383	0.140527	-0.656912	0.511238	0.446211	0.655445	0.263731	0.791987	-0.0868144	0.930819	-0.966261	0.333914	0.359583	0.719159
rs11745587	6040398	AC034220.3;SLC22A4	1.38495	0.166068	-1.2049	0.228243	1.73308	0.0830814	-0.449286	0.653226	0.447937	0.654199	1.19256	0.233041	1.43	0.152716	0.709714	0.477882	0.52774	0.59768	2.00159	0.0453291
rs2852894	4610102	TMEM123	-1.65955	0.0970058	0.095376	0.924016	0.143643	0.885782	-0.120849	0.903811	0.161307	0.871852	-0.78953	0.429802	0.397621	0.69091	0.736069	0.461688	-0.141931	0.887135	-0.280719	0.778926
rs10937361	2760309	-	0.652719	0.513938	-2.15946	0.0308148	1.77019	0.0766948	-0.817282	0.413767	-0.0028134	0.997755	-0.372052	0.709854	2.27023	0.0231934	0.514568	0.606855	1.83141	0.067039	1.38223	0.166901
rs3814095	1400017	CBX3	0.0361041	0.971199	-2.09893	0.0358233	2.33895	0.0193381	-1.73524	0.0826985	-1.96712	0.0491695	-1.01528	0.309974	-0.344497	0.730472	-1.91113	0.0559879	-1.36859	0.171127	-1.55384	0.120224
rs3752246	2230242	CNN2	-1.08083	0.279774	0.304576	0.760689	-0.172077	0.863377	-0.042244	0.966304	1.0717	0.283856	-0.572061	0.567281	1.15469	0.248219	-0.423392	0.672009	1.91743	0.0551828	0.995928	0.319285
rs2286576	6270382	DYRK4;NDUFA9	0.294744	0.768189	0.236879	0.812751	0.0581914	0.953596	2.03344	0.042008	0.571887	0.567398	-0.15253	0.878769	0.471388	0.637364	0.409932	0.681856	-0.104082	0.917104	0.699722	0.484101
rs1057233	5810398	SPI1	0.075908	0.939492	2.40766	0.016055	-1.19068	0.233779	3.22582	0.00125613	3.41131	0.000646506	2.23092	0.0256863	0.610529	0.541512	2.89677	0.00377025	2.49322	0.0126591	3.87065	0.000108545
rs11169552	510064	DIP2B	-1.42148	0.155179	0.277113	0.781693	-0.382052	0.702423	-0.513075	0.607899	0.119137	0.905167	-0.662506	0.507647	-0.883439	0.376999	-0.554662	0.579126	0.0300977	0.975989	-1.12361	0.261176
rs2952768	7510092	AC079767.2;CREB1;METTL21A	-0.549622	0.582579	-0.0373718	0.970189	-0.58676	0.557365	-0.244035	0.807203	-0.605181	0.545058	-1.56823	0.116828	-0.0305697	0.975613	1.76215	0.0780437	-0.538196	0.590442	0.50582	0.612983
rs11118607	6590563	U6atac	0.394277	0.693376	-0.319157	0.749607	-1.02605	0.30487	0.253477	0.7999	1.18655	0.235405	-0.0634927	0.949374	0.83583	0.403251	0.566737	0.570893	1.5893	0.111992	1.71106	0.0870691
rs728989	6280053	SMARCAD1	0.0178018	0.985797	0.193017	0.846945	-0.40569	0.68497	0.921368	0.356858	0.449507	0.653066	0.0633469	0.94949	0.112897	0.910112	1.78467	0.0743141	0.611564	0.540826	0.448892	0.653509
rs1897786	4670020	CYFIP1;NIPA2	-1.38182	0.167026	1.85962	0.062939	-1.68121	0.0927216	1.63379	0.102303	0.447596	0.654445	-0.943205	0.345576	1.89154	0.0585526	-0.157111	0.875157	1.30352	0.192396	0.125431	0.900182
rs2155086	1400689	JAM3;NCAPD3	-0.971977	0.331062	2.00623	0.0448317	-0.915537	0.35991	0.468572	0.639376	1.69559	0.0899635	0.607249	0.543685	-1.12648	0.259964	-0.664693	0.506247	0.0875228	0.930256	-1.37102	0.170368
rs12196107	3060471	ENPP4	2.65275	0.00798393	-3.8722	0.000107858	1.26282	0.206654	-1.25553	0.209286	-2.79326	0.00521804	-4.92931	8.25212e-07	3.20956	0.00132936	-0.344004	0.730843	0.667368	0.504537	-0.714531	0.474899
rs10875595	430270	TAF7	0.592555	0.553479	0.636879	0.524204	0.920092	0.357524	0.409673	0.682046	1.80479	0.0711081	1.45185	0.146543	-0.251343	0.801549	-0.51686	0.605254	0.348314	0.727605	1.04414	0.296422
rs11671653	1980521	SLC44A2	0.101665	0.919022	0.559849	0.575583	-0.513043	0.607922	0.884325	0.376521	0.7387	0.460089	0.365157	0.714994	0.86407	0.387549	-1.00021	0.317208	1.73809	0.0821944	0.841158	0.400259
rs1563055	3440500	ELP3	0.682463	0.494946	-0.441015	0.659202	0.646905	0.517694	-1.66444	0.0960248	0.969046	0.332522	0.513021	0.607937	0.733719	0.46312	1.22884	0.21913	0.958324	0.337899	1.84869	0.0645033
rs343764	520678	CD53	0.0539812	0.95695	-0.379243	0.704508	0.132334	0.89472	0.593607	0.552775	1.50834	0.131467	1.67976	0.0930042	-0.314071	0.753467	-0.036731	0.970699	-0.491718	0.622919	-0.876066	0.380994
rs5760805	3120474	KIAA1671	0.152411	0.878863	2.35977	0.0182864	-0.295573	0.767556	1.85663	0.0633633	3.09137	0.00199232	1.55575	0.119768	0.516644	0.605404	0.441758	0.658664	1.83749	0.0661379	1.92406	0.0543468
rs7280998	4010370	C21orf91-OT1	-0.373568	0.708726	0.0476043	0.962032	-0.40996	0.681835	-0.679872	0.496585	0.193584	0.846502	0.0155316	0.987608	2.0866	0.0369242	-0.507219	0.612001	1.15259	0.249078	0.771299	0.44053
rs12035706	2940113	AGL	0.515676	0.606081	-1.28112	0.20015	1.16975	0.2421	-0.352949	0.724127	1.32941	0.183713	0.617591	0.536845	1.26434	0.206108	0.430233	0.667026	1.4747	0.140292	-0.169556	0.865359
rs7860634	3060494	CARD9	1.45502	0.145665	0.895538	0.370499	-0.884161	0.376609	-0.0803332	0.935972	1.11111	0.266523	1.40228	0.160832	-0.938664	0.347903	1.51331	0.130201	0.33217	0.739761	1.07567	0.282076
rs10191556	6200113	ING5	0.980958	0.326613	-1.12385	0.261077	0.77966	0.435591	-0.702406	0.482426	-2.22616	0.0260033	-0.207977	0.835247	0.12419	0.901165	1.91772	0.0551461	-1.98077	0.047617	-0.332837	0.739257
rs7531045	7150154	-	0.0515925	0.958853	0.799451	0.424029	-0.43776	0.66156	1.41052	0.158386	0.951508	0.341347	0.415157	0.678027	1.0071	0.313889	1.56505	0.11757	0.636048	0.524745	0.221031	0.825069
rs10065637	5340451	ANKRD55	-0.5403	0.58899	2.09251	0.0363925	-2.72207	0.00648735	2.88468	0.00391816	0.913751	0.360848	-1.19596	0.231712	0.243831	0.807362	-1.14269	0.253169	-0.185017	0.853215	-0.608541	0.542829
rs11937417	4760674	NEK1	-1.25309	0.210173	0.789195	0.429998	-1.46666	0.142468	0.873922	0.382161	0.665725	0.505587	0.195689	0.844854	0.563675	0.572975	-1.2579	0.208429	0.993539	0.320447	-0.81605	0.414471
rs12577118	6420747	TSPAN4	-0.981364	0.326413	0.108407	0.913673	0.591789	0.553992	-0.0726255	0.942104	0.125471	0.900151	-0.304398	0.760825	-0.265077	0.79095	0.0565135	0.954933	0.221467	0.824729	-0.898689	0.368818
rs3206634	6770553	SMAD5	0.537571	0.590873	-0.512964	0.607976	-0.787832	0.430795	-1.23572	0.216562	1.73284	0.0831242	0.707364	0.479341	2.02173	0.0432048	0.328201	0.742759	2.78262	0.00539219	1.48504	0.137534
rs12526186	1190367	IER3	1.49414	0.13514	-0.89842	0.368962	0.147328	0.882873	0.371853	0.710003	-0.512275	0.608459	0.00279312	0.997771	0.286972	0.774134	-1.0935	0.274175	-0.716345	0.473779	0.37098	0.710652
rs14204	4610338	OGG1;CAMK1	0.677695	0.497965	0.458897	0.646308	1.10911	0.267382	0.635248	0.525266	0.917991	0.358623	1.01442	0.310385	-0.666079	0.50536	-1.10901	0.267424	0.200945	0.840742	1.13632	0.255824
rs4845552	2510445	-	-0.894893	0.370844	0.330347	0.741138	0.0507629	0.959514	1.09802	0.272194	0.382881	0.701808	0.445929	0.655649	2.27707	0.0227819	2.0028	0.0451987	0.135073	0.892554	0.487804	0.625689
rs3819256	3310228	RP11-91P24.7;AAMDC	-0.456461	0.648059	0.796625	0.425669	-0.915821	0.359761	1.38723	0.165371	1.34148	0.179766	0.641692	0.521073	-1.17082	0.241671	0.199038	0.842233	-0.587593	0.556805	-0.0313679	0.974976
rs7081029	6940278	AKR1CL1	-0.506119	0.612773	-0.343953	0.730881	0.826731	0.40839	0.162581	0.870848	0.416849	0.676789	-0.197256	0.843627	0.836365	0.402949	-0.037756	0.969882	1.63475	0.102101	1.86498	0.0621843
rs17418268	1510181	AL590369.1;PTGES	2.61426	0.00894198	1.03483	0.30075	-0.25475	0.798916	0.729908	0.465446	1.16677	0.243304	1.8047	0.071122	-0.876821	0.380584	2.44399	0.0145258	-1.10452	0.269367	1.87728	0.0604793
rs10902218	2570239	PDDC1	0.283636	0.776689	1.26992	0.204112	-0.899739	0.368259	2.19604	0.0280888	1.64434	0.100105	0.555056	0.578856	-1.64065	0.100869	0.648692	0.516538	-0.375419	0.707349	0.536951	0.591302
rs7804356	6040008	SKAP2	-0.37144	0.71031	-0.667656	0.504353	0.361734	0.717551	-1.05577	0.291073	1.32721	0.18444	-0.647166	0.517524	3.74266	0.000182082	0.141908	0.887152	4.04529	5.22587e-05	1.91211	0.0558618
rs1045911	3840167	-	-1.36522	0.172183	0.94489	0.344715	0.80105	0.423103	0.475421	0.634487	1.46717	0.14233	-0.239752	0.810523	-1.02121	0.307156	-0.0644331	0.948625	0.897723	0.369333	0.317803	0.750634
rs2387701	1940435	NDUFAF4	0.840594	0.400575	-1.02163	0.306954	-0.179919	0.857216	0.0658501	0.947497	0.000453525	0.999638	-0.508602	0.611031	1.04237	0.29724	0.985367	0.324444	0.635346	0.525203	1.2181	0.223185
rs7748442	540465	ENPP5	-0.317149	0.75113	-0.687262	0.491918	0.198534	0.842627	-0.247347	0.804639	-1.15353	0.248694	-0.635982	0.524788	-0.726868	0.467307	-1.21973	0.222566	-1.65376	0.0981761	-0.657629	0.510776
rs1441756	5560674	LPL	1.8185	0.0689873	0.97098	0.331558	-1.24556	0.212925	1.24505	0.213115	0.935358	0.349604	2.21989	0.0264264	-1.20156	0.229535	1.71162	0.0869674	-0.593718	0.552701	1.49301	0.135434
rs760501	7610121	FAM120B	-2.02785	0.0425758	1.07618	0.281849	1.37919	0.167835	0.74957	0.453513	0.523784	0.600429	-1.91011	0.0561187	0.96751	0.333289	0.190228	0.849131	-0.626142	0.531222	-0.924374	0.355292
rs7189840	4220672	MT1F	-0.5038	0.614402	3.13872	0.00169688	-1.87135	0.0612972	3.18536	0.00144574	4.12124	3.7684e-05	0.67464	0.499905	0.143197	0.886135	-0.34382	0.730982	2.33251	0.0196739	2.64094	0.00826769
rs7112513	2900731	PCSK7	-1.16484	0.244084	0.545426	0.58546	-1.02804	0.30393	1.19451	0.23228	0.333077	0.739076	-0.945699	0.344302	0.262188	0.793177	-1.15507	0.248063	1.05195	0.292824	-0.688322	0.49125
rs12114373	2640377	CPQ	-1.32963	0.183639	1.66799	0.0953176	0.509512	0.610393	1.6003	0.109531	0.541738	0.587999	-0.615812	0.538019	-1.31575	0.188257	-0.373211	0.708991	0.711308	0.476893	0.479367	0.631677
rs10845606	6200072	GPR19	0.422622	0.672571	1.08877	0.276256	-0.194584	0.845719	1.10126	0.270782	1.18218	0.237136	0.798671	0.424481	0.0610253	0.951339	-0.340329	0.733609	0.427909	0.668717	1.07013	0.284562
rs2562456	4290019	ZNF493;CTD-2561J22.3	0.0693426	0.944717	1.21358	0.22491	-1.12512	0.260539	0.540845	0.588615	2.10619	0.0351881	0.84073	0.400499	0.907498	0.364144	0.900022	0.368109	2.12837	0.0333068	0.386428	0.69918
rs2028299	2340240	C15orf38-AP3S2;C15orf38	-0.980341	0.326918	0.0471273	0.962412	-0.804994	0.420823	-0.63312	0.526656	-0.621657	0.534167	-0.759039	0.447829	1.35888	0.174186	-0.559286	0.575967	0.767939	0.442523	-1.22351	0.221139
rs2523722	110255	TRIM10	-2.14328	0.0320903	-1.83629	0.0663144	2.6948	0.00704306	-1.14127	0.253756	-1.80826	0.0705664	-2.74287	0.00609057	0.622962	0.533309	-3.10705	0.00188965	-0.623217	0.533142	-1.16416	0.244358
rs2298222	3450056	TP73-AS1	-1.3233	0.185736	0.365138	0.715008	0.359173	0.719465	2.16924	0.0300641	0.448497	0.653795	-1.0593	0.289462	0.920798	0.357156	-1.43853	0.150284	1.37054	0.170517	0.499637	0.617331
rs4788839	4780196	CD300A	1.10946	0.267233	-2.54766	0.0108449	2.75961	0.00578707	-2.0723	0.0382374	-0.970169	0.331962	-0.0900631	0.928237	0.944559	0.344884	-0.242923	0.808065	-0.338945	0.734651	0.649251	0.516176
rs12610185	1570373	GATAD2A	-0.413844	0.678989	-0.662509	0.507645	1.48282	0.138122	-0.629575	0.528972	-0.265326	0.790758	-0.502529	0.615296	0.478562	0.63225	-0.408833	0.682662	0.726861	0.467311	1.57286	0.115751
rs7209435	6110035	DDX42	-0.783636	0.433254	0.248407	0.803819	0.162415	0.870979	-0.00520819	0.995844	-0.967007	0.333541	-0.718321	0.47256	0.495397	0.62032	-0.423778	0.671728	0.382726	0.701923	-0.0885691	0.929424
rs2301271	3940477	TAP2	-1.61517	0.106273	-0.175291	0.860851	-0.514804	0.60669	-0.336977	0.736134	0.351234	0.725413	-0.734053	0.462917	-0.644307	0.519377	-1.00782	0.313539	0.649793	0.515826	0.349212	0.72693
rs791464	5820600	REEP6	-0.44946	0.6531	0.755718	0.449819	-0.639231	0.522673	1.2538	0.209915	-0.523711	0.600479	-0.375375	0.707382	-0.805825	0.420344	0.873047	0.382638	-2.30413	0.0212151	-0.688953	0.490853
rs11624919	5700301	GSKIP	0.748311	0.454273	2.97663	0.00291437	-1.69986	0.0891566	1.72033	0.0853726	4.21615	2.48507e-05	2.8931	0.0038146	-1.33578	0.18162	1.67882	0.0931875	1.32148	0.186341	1.73172	0.0833239
rs10488631	4280647	-	-0.659139	0.509806	1.38942	0.164705	0.0984147	0.921603	0.713692	0.475417	0.647014	0.517623	-0.589186	0.555737	-1.19354	0.232657	-0.00124684	0.999005	-0.388011	0.698008	-1.66491	0.0959311
rs3741976	5560746	ERC1	-1.02498	0.305371	-0.886311	0.37545	-0.608613	0.542781	-0.229422	0.818541	0.15252	0.878777	-1.14044	0.254101	1.28614	0.198393	1.45652	0.14525	0.728472	0.466325	0.407512	0.683632
rs9999836	4490735	KIAA0232	2.5576	0.0105397	1.12456	0.260775	0.281012	0.778701	0.564821	0.572195	3.54539	0.000392036	2.92476	0.00344725	0.425744	0.670295	1.10684	0.268362	1.31585	0.188225	2.60522	0.00918154
rs10132640	610523	RP11-371E8.4;C14orf142	0.372762	0.709326	-0.0913782	0.927192	-0.249871	0.802687	-0.228693	0.819107	0.716267	0.473827	-0.158614	0.873973	-0.0106246	0.991523	-0.627381	0.53041	0.726874	0.467303	-0.221468	0.824728
rs4928170	2690427	TBC1D23	-0.576811	0.564067	0.312583	0.754598	-0.0710071	0.943392	0.528214	0.597351	-1.13414	0.256737	-1.32014	0.186789	-1.37091	0.170403	-0.081083	0.935376	-1.79203	0.0731284	-0.497488	0.618845
rs713875	5910390	SF3A1	-0.315685	0.752241	-1.83754	0.0661304	0.946024	0.344136	-0.0971223	0.922629	-0.847447	0.396746	-0.669048	0.503465	0.815623	0.414716	0.261783	0.793489	-0.673358	0.50072	0.0412064	0.967131
rs10865974	3710343	ITIH4	-2.51079	0.0120461	-0.886691	0.375245	0.725006	0.468448	0.37204	0.709863	-2.42974	0.0151095	-3.13106	0.00174174	1.97898	0.0478182	-1.65422	0.098082	-0.0013163	0.99895	-0.360951	0.718136
rs2770957	540239	TRIM41	-2.49318	0.0126603	-1.26181	0.207019	0.712237	0.476318	-0.375132	0.707563	-0.555484	0.578564	-2.60189	0.00927116	1.56651	0.117229	-0.0826761	0.934109	1.81606	0.0693611	-0.540338	0.588964
rs1046602	460333	SPAST	1.39466	0.163118	-0.517835	0.604574	0.0282555	0.977458	-0.354008	0.723333	2.34746	0.018902	1.45702	0.14511	1.17753	0.238985	0.456998	0.647673	3.9868	6.69718e-05	3.0505	0.00228457
rs1058474	2030070	AC005606.15;ZNF598	0.19551	0.844993	-1.57983	0.114145	1.03587	0.300262	0.627057	0.530622	-1.11905	0.263121	-0.320202	0.748815	0.658053	0.510504	-0.0979089	0.922005	-0.687147	0.49199	-0.428157	0.668537
rs7811662	2190541	GATS;STAG3	1.74643	0.0807366	1.53389	0.125058	-1.41715	0.156439	2.09533	0.0361419	2.15709	0.0309989	1.5448	0.122394	-0.145286	0.884485	2.06256	0.0391545	0.329335	0.741902	1.4652	0.142866
rs3740787	5090221	PRDM11;AC103681.1	1.78737	0.0738773	1.85549	0.0635264	-0.997101	0.318716	1.10654	0.268491	1.22704	0.219806	2.04537	0.0408181	-0.20009	0.84141	1.89648	0.0578961	-0.257616	0.796703	2.77581	0.00550646
rs7790846	4390086	IKZF1	-0.708266	0.47878	-0.0272266	0.978279	0.771163	0.440611	1.51548	0.12965	-0.592497	0.553518	-1.61859	0.105537	1.16817	0.24274	-0.361802	0.7175	1.04266	0.297106	0.675511	0.499351
rs7219221	5690520	CHMP6	1.49323	0.135376	0.739835	0.4594	-0.654854	0.512562	-0.461319	0.64457	1.52339	0.12766	1.33143	0.183049	0.105583	0.915913	0.407575	0.683586	0.292363	0.770009	1.91495	0.0554983
rs1751492	6980255	LEPR;LEPROT	2.6297	0.00854593	-1.03298	0.301613	1.2157	0.224098	-1.47199	0.141023	1.96224	0.0497346	3.02311	0.00250188	-0.336567	0.736444	2.27433	0.0229459	1.24869	0.211777	0.666945	0.504807
rs3793427	1090221	VPS37A	-1.36988	0.170723	1.70391	0.088398	-0.284831	0.775774	1.85868	0.0630725	1.77894	0.0752494	0.329146	0.742045	1.64957	0.0990316	-1.4957	0.134733	2.34391	0.0190829	-0.319837	0.749092
rs4680880	4010431	RBMS3	1.79855	0.0720902	-1.18154	0.237386	0.925609	0.354649	-0.921856	0.356604	-0.448432	0.653841	1.6074	0.107967	0.545235	0.585592	0.834616	0.403934	0.130814	0.895922	0.915336	0.360015
rs1010502	1010110	TMEM9	-0.63633	0.524561	-2.29021	0.0220093	0.49276	0.622182	-2.23664	0.0253096	-2.69161	0.00711079	-2.08806	0.0367921	-0.765481	0.443985	-0.334351	0.738115	-2.11591	0.0343528	-3.17782	0.00148385
rs12708716	2470386	CIITA;DEXI	0.199957	0.841514	-0.573722	0.566156	0.803216	0.42185	0.100041	0.920312	1.00875	0.313093	0.686525	0.492382	1.77112	0.0765409	2.17173	0.0298758	1.43949	0.150013	1.2718	0.203446
rs249570	1690735	NEDD1	0.412597	0.679902	-0.521075	0.602314	1.0791	0.280541	-1.89197	0.0584956	1.01464	0.310279	1.02704	0.3044	2.01015	0.0444155	0.360557	0.71843	2.04256	0.0410958	2.09715	0.0359805
rs6457620	3940477	TAP2	0.940853	0.34678	-1.94284	0.0520349	2.2667	0.0234084	-1.23039	0.218553	-1.08663	0.277201	-0.613366	0.539634	1.28415	0.199088	-1.42205	0.155013	-0.0154937	0.987638	0.168351	0.866307
rs4148546	2450201	ABCC4	-0.265278	0.790796	-0.324935	0.74523	-0.664516	0.50636	-2.14252	0.0321514	-0.131183	0.895631	0.250868	0.801916	0.354784	0.722751	0.195091	0.845322	0.857125	0.391376	0.618801	0.536048
rs4812048	4390288	TH1L	-1.65468	0.0979902	-0.13499	0.89262	0.108167	0.913863	0.744299	0.456696	0.252367	0.800757	-1.95207	0.0509297	2.66612	0.00767324	-0.66886	0.503585	1.73259	0.0831682	0.493447	0.621697
rs2039153	6220075	GNG12-AS1;WLS	1.21325	0.225036	0.417746	0.676132	0.0861871	0.931318	-0.539501	0.589541	0.716173	0.473884	1.18962	0.234196	1.05667	0.29066	-0.311469	0.755444	0.759047	0.447824	1.13581	0.256038
rs11070297	110615	DNAJC17	0.386451	0.699163	0.592878	0.553263	-0.379201	0.704539	2.02148	0.0432298	-0.0675328	0.946158	-0.202969	0.83916	-0.0207163	0.983472	0.547096	0.584313	0.0950767	0.924254	0.771404	0.440467
rs7963469	2570373	PPHLN1	-0.606615	0.544106	0.0276831	0.977915	-0.96502	0.334535	0.117345	0.906587	0.866101	0.386435	-0.420295	0.67427	1.73963	0.0819244	0.603827	0.545958	2.40369	0.0162307	0.666569	0.505047
rs2969114	3890047	NOM1	-0.452044	0.651237	-0.339863	0.73396	0.459281	0.646032	0.0966253	0.923024	0.164838	0.869071	-0.31601	0.751995	0.368079	0.712814	0.572164	0.567211	0.907018	0.364397	-0.709166	0.478221
rs2439312	1940128	NRG1	0.577042	0.563911	0.575774	0.564768	0.531087	0.595359	0.640023	0.522158	2.16441	0.0304327	1.58262	0.113508	2.9955	0.00273992	0.884377	0.376493	4.13078	3.61531e-05	3.43144	0.000600389
rs13411881	4120609	DGUOK-AS1;DGUOK	0.0526071	0.958045	0.0488001	0.961079	-0.897277	0.369571	-0.0478903	0.961804	0.00109678	0.999125	0.219183	0.826508	0.971817	0.331141	0.0106425	0.991509	0.127422	0.898607	0.50299	0.614972
rs7355584	4810020	PLEK	0.201212	0.840533	2.65426	0.0079482	-2.02637	0.0427265	2.47957	0.013154	1.51696	0.129277	0.941143	0.346632	-1.2637	0.206338	-1.91252	0.0558101	0.204178	0.838214	-0.313215	0.754118
rs7043158	7560706	FAM225A	2.24011	0.025084	0.865652	0.386681	-1.11482	0.264929	-1.77089	0.0765782	1.97348	0.0484408	2.21261	0.0269248	-0.158979	0.873686	3.4908	0.000481585	0.454247	0.649651	0.461518	0.644427
rs1091528	6940215	MRAS	-1.29895	0.19396	0.602925	0.546558	-0.610374	0.541614	0.655476	0.512161	0.0126748	0.989887	-0.13136	0.895491	0.932847	0.350899	0.366697	0.713845	0.158711	0.873897	-0.544433	0.586143
rs6099636	6860768	RAE1	0.782743	0.433778	0.496893	0.619264	-0.780017	0.435381	0.56501	0.572067	-0.381169	0.703078	0.886474	0.375362	0.210267	0.83346	0.318845	0.749844	-0.115346	0.908171	0.465912	0.641278
rs11023332	5130471	PDE3B	-0.836485	0.402882	0.269194	0.787781	-0.963477	0.335308	1.52629	0.126939	0.644623	0.519172	-1.29172	0.196454	-0.788305	0.430518	-0.394968	0.692867	0.360417	0.718535	-0.217517	0.827805
rs3771166	6520180	IL18RAP	5.21909	1.79808e-07	-0.497921	0.61854	0.0294371	0.976516	1.15646	0.247494	2.407	0.0160843	3.59616	0.000322943	1.56251	0.118169	4.35211	1.34834e-05	1.33692	0.18125	4.62328	3.7771e-06
rs10510102	4220100	RP11-500G22.2;ATE1	0.157142	0.875133	-0.745362	0.456053	0.116345	0.907379	-0.0397024	0.96833	0.276324	0.782299	0.126709	0.899171	2.58125	0.00984424	1.1366	0.255706	1.97941	0.0477698	2.61091	0.00903026
rs7024560	270487	SH2D3C	-0.240287	0.810108	0.357857	0.72045	-0.551293	0.581433	1.25125	0.210843	1.45084	0.146825	0.513962	0.607278	0.459683	0.645744	0.631586	0.527657	1.54803	0.121615	2.56104	0.0104358
rs1265742	5270608	VPS29	-0.248173	0.804	0.587396	0.556938	-0.0292091	0.976698	0.666567	0.505049	0.222521	0.823908	-0.102276	0.918537	0.454285	0.649624	0.693375	0.488074	-0.306131	0.759505	0.430895	0.666544
rs10875943	4780753	-	0.454982	0.649122	0.18366	0.85428	-0.284541	0.775996	-0.0326429	0.973959	-0.62505	0.531938	-0.161235	0.871909	-0.343532	0.731198	0.199477	0.84189	-1.10706	0.268269	-0.478691	0.632158
rs1884419	1450129	CSTF1	-2.01362	0.0440493	1.96326	0.0496164	-0.502759	0.615134	1.30006	0.193582	0.586601	0.557471	-0.745111	0.456205	0.84973	0.395475	-0.565849	0.571496	0.997053	0.318739	-0.354113	0.723254
rs12139364	5670037	-	-1.93492	0.0529998	1.50521	0.132269	-1.24537	0.212996	0.776578	0.437408	-0.625453	0.531673	-1.87942	0.0601867	0.505395	0.613281	-1.3655	0.172097	-0.0606393	0.951647	-0.915328	0.36002
rs2036527	6020328	IREB2	2.23779	0.0252348	1.9743	0.0483475	-1.30552	0.191716	1.32069	0.186604	3.68025	0.000233005	3.46873	0.000522925	0.0253473	0.979778	1.30307	0.192552	2.06832	0.0386103	3.39575	0.000684406
rs7649034	160315	RP11-81N13.1	1.87817	0.0603573	0.224224	0.822583	-0.231343	0.817048	-0.190747	0.848724	0.59279	0.553322	0.885576	0.375846	-1.97237	0.0485676	1.00396	0.315397	-0.495891	0.619971	0.280203	0.779322
rs13376333	6250019	PYGO2;SHC1	-0.0201283	0.983941	-0.361561	0.71768	0.708693	0.478515	0.0248242	0.980195	-0.576341	0.564385	0.414901	0.678215	0.598296	0.549642	0.132822	0.894334	1.24921	0.211587	1.42197	0.155036
rs494085	4050475	KIAA0319L	0.210593	0.833205	-0.261241	0.793907	1.23443	0.217044	0.993718	0.32036	0.446357	0.655339	0.988523	0.322896	0.288257	0.77315	-1.02915	0.303408	0.793963	0.427217	-0.0731402	0.941695
rs11905852	10408	-	0.541639	0.588067	0.494272	0.621114	0.788269	0.43054	0.624158	0.532524	0.551503	0.581289	0.758537	0.448129	-0.4659	0.641287	-0.141952	0.887118	-0.65915	0.509799	-0.261674	0.793573
rs7208487	1940747	PPP1R1B	2.52544	0.0115553	-1.13616	0.255891	1.83875	0.0659518	-1.90794	0.0563985	-0.331887	0.739974	1.75261	0.0796695	-0.796352	0.425828	0.0639631	0.949	-0.690956	0.489593	2.96232	0.00305333
rs3892373	940035	SLC4A7	0.360116	0.718761	0.954449	0.339856	-0.700503	0.483613	0.284107	0.776329	1.47544	0.140095	1.4167	0.156571	0.7063	0.480002	1.67281	0.0943642	0.466293	0.641006	1.45106	0.146764
rs7310409	7650097	OASL	0.357909	0.720411	0.237988	0.81189	0.221113	0.825004	-1.31365	0.188963	0.503497	0.614615	0.0223724	0.982151	1.87039	0.0614304	1.56928	0.116582	1.39801	0.162111	1.36124	0.173439
rs2666922	940672	SLC35C1	1.56772	0.116947	-0.333724	0.738588	0.881006	0.378314	-0.58299	0.5599	0.266335	0.789981	1.1293	0.258773	0.105104	0.916293	0.906621	0.364607	-0.145241	0.884521	1.60702	0.108049
rs2467853	3940292	GATM	-0.153134	0.878293	3.2597	0.0011153	-2.65468	0.0079383	4.39658	1.09969e-05	2.29109	0.0219583	1.05665	0.29067	-1.04628	0.295431	-0.113177	0.90989	0.487398	0.625976	2.62853	0.00857545
rs1265093	3890097	TCF19;POU5F1	0.605158	0.545074	-0.0247281	0.980272	-0.450853	0.652095	0.315902	0.752077	0.803341	0.421778	0.163311	0.870274	0.692205	0.488809	1.21089	0.225937	1.96582	0.04932	1.67838	0.0932723
rs2844479	3850433	HSPA1B	0.442403	0.658198	1.75387	0.0794536	-0.954228	0.339968	1.7816	0.074814	1.62527	0.104104	1.27924	0.200814	-2.03381	0.0419706	0.969479	0.332306	-0.732913	0.463612	0.00551366	0.995601
rs4729575	6200743	RP11-506M12.1;CNPY4	0.841542	0.400044	0.397303	0.691144	-0.429361	0.667661	-1.19037	0.2339	1.07096	0.284188	0.717636	0.472982	1.21944	0.222676	0.54538	0.585492	2.21805	0.0265511	1.3584	0.174336
rs2234006	3130619	RP5-894A10.5	-0.00655312	0.994771	-2.31484	0.0206218	1.81534	0.0694721	-3.55984	0.000371077	-2.32125	0.0202735	-1.18272	0.236919	1.52071	0.128334	-1.11345	0.265516	0.0820825	0.934581	-1.36016	0.173779
rs2030137	7160360	SKAP2	6.86809	6.50686e-12	-0.62439	0.532371	1.29236	0.196234	0.415607	0.677697	2.82257	0.0047641	4.90287	9.4446e-07	0.892079	0.372351	1.32247	0.18601	1.24962	0.21144	6.35462	2.08945e-10
rs4488967	4640500	UCHL1	-0.431471	0.666126	-0.415279	0.677937	-0.122123	0.902802	0.859532	0.390047	-1.24386	0.213551	-1.26317	0.206528	0.779119	0.43591	-0.172283	0.863215	0.33679	0.736276	-0.166754	0.867564
rs736408	1300497	SPCS1	0.923744	0.35562	0.145854	0.884036	1.87089	0.0613603	1.28002	0.200538	-1.37151	0.170215	-0.685217	0.493207	-0.6338	0.526211	-1.26811	0.204758	-1.51178	0.13059	1.47109	0.141266
rs10036388	4200170	RMND5B	-0.220197	0.825718	0.532189	0.594595	1.18993	0.234076	-0.11259	0.910356	0.631341	0.527817	0.207716	0.835451	-1.01996	0.30775	1.94984	0.0511953	0.0663621	0.94709	-0.039316	0.968638
rs2286670	7210543	PLD2	1.5975	0.110154	-1.94882	0.0513174	0.413416	0.679302	-1.26875	0.204532	-0.632031	0.527367	0.526142	0.59879	0.746763	0.455207	1.26192	0.206979	0.957492	0.338319	1.54885	0.121418
rs2241977	3360017	AC016683.6	-1.66451	0.0960101	0.1824	0.855269	-1.08155	0.279454	-0.2444	0.806921	-0.926109	0.354389	-1.97466	0.048307	0.686907	0.492142	-1.03008	0.302971	-0.245326	0.806204	0.257612	0.796707
rs3217869	2350762	C12orf5	0.779264	0.435824	-0.206703	0.836241	-1.14296	0.253054	-0.363689	0.716091	-0.205513	0.837171	-0.593446	0.552883	-1.58503	0.112959	-0.521685	0.601889	-1.63314	0.102439	-0.586887	0.557279
rs8919	1440037	BID	0.934895	0.349842	-1.47216	0.140978	0.825306	0.409198	-0.609387	0.542268	1.03927	0.298678	0.48159	0.630097	3.70664	0.000210024	0.793154	0.427688	3.77591	0.000159428	2.6187	0.0088265
rs1012683	2570561	H2AFJ	0.167769	0.866765	0.0582611	0.953541	-0.554249	0.579408	-0.18564	0.852727	-0.159705	0.873113	0.925934	0.35448	0.0734638	0.941437	-0.139275	0.889233	-0.60605	0.544482	-0.0561135	0.955251
rs2024859	510692	SCMH1	-0.757769	0.448589	-0.287661	0.773606	-0.76808	0.44244	1.14584	0.251861	0.145818	0.884065	-0.738649	0.46012	1.33657	0.181363	1.2135	0.224939	0.474863	0.634885	-0.588832	0.555974
rs1799964	3450156	CSNK2B	0.440229	0.659772	-0.293238	0.76934	-0.80327	0.421819	-0.384992	0.700243	0.719754	0.471676	1.12048	0.262509	1.14286	0.253096	0.712282	0.47629	1.42663	0.153686	1.06624	0.286314
rs1179620	580484	HIP1	9.90357	4.01664e-23	-6.34657	2.20171e-10	6.76871	1.29935e-11	-3.70798	0.000208918	0.0642913	0.948738	5.33963	9.31382e-08	4.76108	1.92563e-06	6.31093	2.77363e-10	3.14776	0.00164525	11.385	4.96483e-30
rs7072216	1030278	PYROXD2	-0.13426	0.893197	-1.28771	0.197847	1.3921	0.163891	-0.931297	0.3517	-1.35145	0.176553	-0.0164026	0.986913	-0.194753	0.845586	-0.403372	0.686675	-0.914223	0.3606	0.39091	0.695864
rs7850258	3440446	C9orf156	-1.97104	0.0487192	0.917875	0.358684	-0.0523805	0.958226	1.97842	0.0478816	-0.207867	0.835333	-1.12243	0.26168	-0.303419	0.761571	-0.63088	0.528119	0.235701	0.813664	-0.491994	0.622724
rs4965121	6580168	ARRDC4	2.91885	0.00351324	4.23088	2.32777e-05	-2.40444	0.0161973	2.44586	0.0144507	5.37723	7.56416e-08	5.17368	2.2953e-07	-0.486662	0.626498	2.44874	0.0143358	2.51921	0.0117619	3.50898	0.000449828
rs6910071	270168	HLA-DRA	1.93958	0.0524312	-1.66074	0.0967654	0.403167	0.686825	-1.05948	0.289381	-0.276306	0.782313	0.373592	0.708708	0.384364	0.700709	1.28769	0.197854	0.045817	0.963456	0.62046	0.534955
rs6457617	2650156	TAP2	0.21969	0.826113	0.0829593	0.933884	-0.589616	0.555448	0.413842	0.67899	0.270395	0.786856	-0.720584	0.471165	0.214518	0.830143	-0.867147	0.385862	-0.179457	0.857579	-0.441605	0.658775
rs2382817	4730349	AC021016.8;PNKD	-1.77986	0.075099	2.1497	0.0315787	-2.77462	0.00552664	3.22504	0.00125956	1.40953	0.158679	-0.597142	0.550413	-0.051261	0.959118	-0.658092	0.510479	0.964289	0.334901	-0.936479	0.349027
rs11879191	4150670	CDC37	-0.495938	0.619938	0.26251	0.792929	-1.32501	0.185169	-0.263296	0.792323	-0.434025	0.66427	-0.544358	0.586195	0.43987	0.660031	0.562193	0.573985	-0.836571	0.402834	-0.079066	0.93698
rs3745902	5670291	-	1.20102	0.229742	2.60727	0.00912686	-0.937913	0.348289	2.07144	0.0383174	3.22377	0.00126514	2.10128	0.0356162	-2.50014	0.0124143	3.31159	0.000927685	0.414099	0.678801	2.45134	0.0142325
rs2293154	2760044	STAT5A	-2.49054	0.0127548	-0.270029	0.787138	-0.976299	0.328917	0.00369998	0.997048	-1.52925	0.126204	-3.4929	0.000477808	-0.219298	0.826418	-0.866616	0.386153	-0.943016	0.345673	-2.9799	0.0028834
rs2394851	3710739	-	0.503902	0.61433	2.72849	0.00636243	-1.3831	0.166635	3.25771	0.00112315	3.09671	0.00195682	1.10778	0.267955	-1.5822	0.113604	-1.77398	0.0760662	0.595767	0.551331	-0.163513	0.870115
rs12518386	5490019	GPX3	2.18791	0.0286763	-1.65899	0.0971175	0.217017	0.828195	-1.52926	0.1262	-0.50394	0.614304	0.0245739	0.980395	0.246159	0.805559	-2.04441	0.0409133	0.413581	0.679181	0.616157	0.537791
rs12918087	5310068	NUP93	0.484588	0.627969	-0.576769	0.564095	-0.627943	0.530042	-1.25416	0.209785	0.28505	0.775606	1.11167	0.26628	1.34441	0.178816	1.18736	0.235085	1.40891	0.158861	-0.0339654	0.972905
rs7174755	2340689	RP11-315D16.2;CLN6	2.38482	0.0170873	-0.449622	0.652983	0.335445	0.73729	1.60539	0.108407	-0.50173	0.615857	1.58503	0.112961	-0.546705	0.584582	0.856746	0.391585	-0.606799	0.543984	1.24167	0.214358
rs13251954	160446	HMBOX1	0.374066	0.708355	-0.555222	0.578743	-0.231586	0.816859	0.562799	0.573572	0.648807	0.516463	0.0168005	0.986596	1.2326	0.217724	-0.835737	0.403303	1.09305	0.274374	1.71506	0.0863347
rs1539973	6040475	TIMM21	0.171193	0.864072	0.490745	0.623607	-0.109752	0.912606	1.23165	0.218078	0.138396	0.889927	0.0666717	0.946843	0.781867	0.434293	2.67256	0.00752757	-0.294477	0.768394	0.81947	0.412518
rs1165151	5570279	HIST1H1C	-0.0287652	0.977052	0.393845	0.693696	0.539264	0.589705	0.454689	0.649333	0.00163426	0.998696	0.100777	0.919727	0.229135	0.818764	-0.70216	0.482579	0.0465706	0.962855	0.608771	0.542676
rs375435	1990725	UBR2	1.23857	0.215505	0.423938	0.671611	0.0388699	0.968994	1.36003	0.173819	1.63357	0.102348	2.03518	0.0418324	2.08752	0.0368415	0.222706	0.823764	1.85109	0.0641572	1.76572	0.0774427
rs2903692	2470386	CIITA;DEXI	-0.244822	0.806594	-0.853792	0.39322	1.09257	0.27458	-0.111904	0.910899	1.06481	0.286963	0.456637	0.647932	1.60471	0.108558	2.33446	0.0195717	1.36921	0.170935	1.26962	0.204219
rs9368635	830739	TRIM39-RPP21;RPP21	-0.539156	0.589779	-0.276441	0.78221	0.733436	0.463292	-0.483467	0.628764	0.772621	0.439746	-0.718155	0.472662	-2.03347	0.0420047	-0.546724	0.584568	-1.56644	0.117245	0.180002	0.857151
rs11857139	60095	DYX1C1-CCPG1;CCPG1	1.49608	0.134633	-0.666214	0.505274	1.50741	0.131706	-0.939853	0.347293	1.34055	0.180066	2.78057	0.00542642	2.64653	0.00813227	0.160115	0.872791	2.68244	0.00730881	3.02111	0.00251847
rs17674580	5560400	SLC14A1	0.104661	0.916645	1.18706	0.235203	1.16497	0.24403	1.04139	0.297696	0.697685	0.485374	0.756232	0.44951	-2.65847	0.00784952	-0.0383961	0.969372	-1.32723	0.184434	-1.08273	0.278928
rs1861423	580465	RP11-488C13.5;VASH1	-0.920967	0.357068	-3.06935	0.00214526	0.658907	0.509955	-0.0312694	0.975055	-1.8556	0.0635112	-3.62398	0.000290107	3.14308	0.00167178	1.46756	0.142224	-0.0938819	0.925203	1.39624	0.162641
rs17020136	3290079	HEATR5B	-1.18199	0.237208	0.141793	0.887244	0.182738	0.855004	0.0622362	0.950375	1.0998	0.271417	-0.146664	0.883397	-1.30628	0.191457	-1.16982	0.242075	0.4513	0.651774	-0.254839	0.798847
rs2078864	4230377	PDK2;SAMD14	-1.51811	0.128987	-0.955159	0.339498	1.43695	0.150732	0.248893	0.803444	-1.2006	0.229906	-2.20339	0.0275672	1.44985	0.147101	0.679084	0.497085	0.758956	0.447879	-0.0251705	0.979919
rs10905818	10612	RBM17	0.681824	0.49535	-0.141306	0.887628	-1.06978	0.28472	0.136644	0.891313	0.0779183	0.937893	-0.213701	0.83078	0.400419	0.688848	-0.260655	0.794359	0.942873	0.345746	0.388388	0.697729
rs12368653	5670577	TSPAN31	-0.0854638	0.931893	1.0731	0.283225	-0.721848	0.470388	1.36508	0.172228	0.686694	0.492276	-0.680867	0.495955	-1.32895	0.183864	0.690791	0.489697	0.734445	0.462678	1.83096	0.067106
rs4377440	2370128	DIRC2	2.80822	0.00498161	0.934895	0.349842	-0.749064	0.453819	1.19182	0.23333	1.79236	0.0730759	2.02955	0.0424021	-0.619445	0.535623	1.60141	0.109286	0.744209	0.45675	1.65993	0.096928
rs13228694	2190541	GATS;STAG3	-0.0359568	0.971317	1.79659	0.0724009	-0.0182028	0.985477	1.6244	0.104291	1.88658	0.0592169	0.103816	0.917315	-0.26014	0.794756	0.87103	0.383738	1.45967	0.144381	-0.345493	0.729723
rs7725227	3130615	PDCD6;AHRR	-0.528315	0.59728	-0.190526	0.848897	1.07404	0.282806	0.574517	0.565618	-1.35327	0.175969	-0.190515	0.848906	-0.276239	0.782364	-0.132895	0.894277	-1.87708	0.0605066	-0.558925	0.576213
rs9862385	5670619	BBX	0.351675	0.725082	-1.21322	0.225044	1.44818	0.147566	-0.764806	0.444387	0.386022	0.69948	-0.587449	0.556902	2.13516	0.0327481	0.199257	0.842062	2.08097	0.0374368	2.04884	0.0404774
rs7992643	2070044	CLYBL	-0.151154	0.879854	2.33594	0.0194941	-2.44046	0.0146687	1.24746	0.212228	0.761441	0.446394	0.933129	0.350753	0.313829	0.753651	1.0356	0.300389	0.208355	0.834952	-0.372087	0.709828
rs4820582	110592	SUSD2	0.181634	0.85587	1.04152	0.297633	-0.235157	0.814087	-0.952712	0.340736	0.939184	0.347637	-0.207246	0.835817	-0.820834	0.411741	2.14402	0.0320314	-0.776392	0.437517	1.55123	0.120847
rs2241209	5420025	UBE3B	-0.197926	0.843103	-0.0767736	0.938804	0.0118904	0.990513	0.0401202	0.967997	-0.271454	0.786042	0.753973	0.450865	1.15218	0.249249	1.00924	0.312862	1.04508	0.295986	1.24933	0.211543
rs10255195	6420242	FIS1	1.31811	0.187466	-1.39194	0.16394	0.15235	0.878911	-0.187437	0.851318	-0.973513	0.330298	-0.568414	0.569754	0.668736	0.503664	0.383007	0.701715	-0.223567	0.823095	0.497225	0.61903
rs380857	3850682	ANKS6	1.099	0.271769	-1.65217	0.0984999	1.17863	0.238545	-1.4786	0.139248	-0.219715	0.826093	-0.0192788	0.984619	1.07086	0.284232	-0.045669	0.963574	0.480467	0.630895	-0.178894	0.858021
rs7259646	6860450	ZNF525	-1.78846	0.0737013	2.38186	0.0172256	-0.920798	0.357156	1.14495	0.252232	1.95639	0.0504194	-0.00672005	0.994638	0.271898	0.785701	-0.44175	0.65867	2.53177	0.0113488	-0.0441849	0.964757
rs894484	290427	ZBTB49	1.35773	0.17455	1.0394	0.298619	-0.455149	0.649002	-0.217777	0.827603	1.32386	0.185548	1.70541	0.0881182	-2.00979	0.044453	0.491582	0.623015	-0.742002	0.458086	-0.0411269	0.967195
rs2304069	1070014	CSF1R	-0.304408	0.760817	0.0219931	0.982453	-0.690989	0.489573	-0.268875	0.788026	0.153484	0.878016	-1.09071	0.275401	0.0353391	0.971809	0.739107	0.459842	0.0942304	0.924926	1.17698	0.239202
rs174547	2360020	FADS2;FADS1	-0.724136	0.468983	1.66745	0.0954241	-1.74975	0.0801621	0.532023	0.59471	2.37078	0.0177505	0.701683	0.482877	1.15144	0.24955	0.958877	0.337621	1.87807	0.0603713	1.52594	0.127026
rs11809207	610600	PAFAH2	-0.64683	0.517742	1.67545	0.0938451	-0.142678	0.886544	-0.110495	0.912017	0.656775	0.511326	0.480334	0.63099	-0.806138	0.420163	0.371479	0.710281	0.304386	0.760834	0.806024	0.420229
rs2677744	6250605	RCCD1	0.369742	0.711574	1.20922	0.226577	-2.08323	0.0372306	0.622089	0.533883	1.09485	0.273584	0.453449	0.650226	1.05471	0.291558	0.560598	0.575071	0.588853	0.55596	0.915174	0.3601
rs861615	3370768	-	1.71215	0.0868682	-0.702356	0.482457	1.69233	0.0905834	-0.450399	0.652423	0.226481	0.820827	1.13551	0.25616	-0.331068	0.740593	1.74428	0.0811109	-0.148215	0.882173	1.20048	0.229953
rs2257167	7550181	IFNAR1	0.393027	0.694299	0.408333	0.683029	0.326589	0.743979	0.0786144	0.937339	-0.283059	0.777132	0.170851	0.864341	0.552868	0.580354	-0.0428449	0.965825	0.376215	0.706757	0.00269704	0.997848
rs2736428	3850433	HSPA1B	-0.0112326	0.991038	1.30604	0.191538	-1.38812	0.165099	1.52189	0.128037	1.53043	0.12591	0.381388	0.702915	-0.774123	0.438858	1.23081	0.218393	0.556715	0.577722	0.84417	0.398575
rs11150805	5130253	HGS;RP13-1032I1.7	-0.0714788	0.943017	1.75417	0.0794017	-0.741227	0.458556	1.06226	0.288119	1.87086	0.0613638	0.706791	0.479696	0.405998	0.684744	0.756166	0.44955	2.3268	0.0199761	1.0259	0.304937
rs2398668	5560544	SNX8	-0.04193	0.966554	-0.88284	0.377322	0.567079	0.57066	-0.203578	0.838683	-0.462728	0.643559	0.386529	0.699105	1.53395	0.125042	-0.549795	0.58246	0.283091	0.777107	-0.517052	0.60512
rs17261197	2100746	-	1.267	0.205156	2.5546	0.0106311	-2.73341	0.00626832	2.26187	0.0237056	1.22054	0.22226	1.25363	0.209978	-1.1582	0.246783	2.22635	0.025991	-1.5075	0.131683	-0.517727	0.604649
rs12881373	3440491	GALC	-0.438894	0.660738	-0.994567	0.319947	1.24241	0.214085	-0.677551	0.498057	-0.0876071	0.930189	-0.283238	0.776995	1.94057	0.0523108	1.53945	0.123695	1.18113	0.237553	1.15154	0.249509
rs17246792	6400711	ZNF573	0.0171017	0.986355	-0.358706	0.719815	-0.797335	0.425256	1.91678	0.0552662	-0.124297	0.90108	-1.12901	0.258894	0.909752	0.362953	-1.60836	0.107756	-0.087589	0.930203	1.29381	0.195732
rs2647045	6450692	PSMB9	1.53956	0.123669	1.27063	0.203862	-0.514349	0.607008	-1.2909	0.19674	0.953144	0.340517	1.36332	0.172781	1.22118	0.222016	0.721046	0.470881	1.34776	0.177735	1.84562	0.0649471
rs11696501	5090097	SYS1;SYS1-DBNDD2	-0.819657	0.412411	0.304185	0.760987	-0.199167	0.842132	-0.0803508	0.935958	-0.371081	0.710577	-1.46854	0.141958	-0.0658657	0.947485	-1.18293	0.236836	0.14248	0.886701	-0.720104	0.471461
rs505922	4490687	RP11-326L24.7;RALGDS;GBGT1	-1.28877	0.19748	1.20688	0.22748	-0.974238	0.329938	1.58408	0.113176	-0.358962	0.719624	-1.05136	0.293092	-1.08037	0.279976	-0.716855	0.473464	-0.96934	0.332376	-1.1068	0.268378
rs3732419	6550288	POGLUT1	0.547463	0.58406	1.46655	0.1425	-0.866031	0.386473	1.83291	0.0668164	3.31388	0.000920114	3.15596	0.00159972	-0.274494	0.783705	1.24898	0.211673	0.515822	0.605979	1.23477	0.216915
rs11906160	7550563	TRPC4AP	1.58576	0.112793	0.767192	0.442967	-0.6185	0.536246	1.56931	0.116575	2.05474	0.0399038	2.66882	0.00761191	0.110484	0.912025	1.96799	0.0490692	0.816549	0.414186	1.2658	0.205586
rs4955826	4220592	CACNA2D3	0.242678	0.808255	0.24245	0.808432	0.503391	0.614689	-0.269815	0.787303	1.31107	0.189835	-0.130278	0.896346	-1.11885	0.263205	1.76672	0.0772745	0.0591613	0.952824	0.918877	0.35816
rs3744787	6980541	TIMP2	0.164226	0.869553	0.220834	0.825222	1.25933	0.20791	0.826313	0.408627	1.34183	0.179652	1.12003	0.2627	0.706973	0.479583	0.891479	0.372673	0.858554	0.390587	0.964527	0.334782
rs919999	6420349	PTPLAD1	-1.6869	0.0916226	-0.0296833	0.97632	0.610291	0.541669	-0.0159085	0.987307	-2.52012	0.0117316	-1.78679	0.073972	-1.69791	0.089525	-1.48204	0.138329	-2.7141	0.00664557	-1.89305	0.0583507
rs1539465	5560500	KCTD12	-1.41712	0.156447	-0.347723	0.728048	-0.89214	0.372318	0.245241	0.806269	0.329216	0.741993	-0.490995	0.62343	0.794162	0.427101	1.18419	0.236337	0.414191	0.678734	-0.424358	0.671304
rs2302189	5910215	RAD51C	0.530201	0.595973	0.457663	0.647195	-0.704857	0.480899	-0.667539	0.504428	1.01468	0.310258	0.720313	0.471332	1.22636	0.220063	2.30029	0.021432	1.65187	0.0985604	2.18584	0.0288272
rs238135	4260189	TGIF1	4.24504	2.18555e-05	0.462283	0.643878	1.3699	0.170717	0.418742	0.675405	2.98169	0.00286662	4.12527	3.70301e-05	0.448605	0.653716	1.39925	0.161737	2.21948	0.0264543	5.28587	1.25106e-07
rs6556416	2260603	RNF145	-0.91673	0.359284	1.03588	0.30026	-0.22964	0.818371	0.690135	0.490109	2.07528	0.0379608	0.653358	0.513526	0.566001	0.571393	-0.0915874	0.927026	1.81202	0.0699837	0.378663	0.704938
rs6857	2140746	PVRL2	1.27388	0.202706	-0.611225	0.54105	0.684234	0.493827	0.241791	0.808942	0.0734913	0.941415	0.588855	0.555958	1.04593	0.295595	-0.682959	0.494633	0.794726	0.426773	2.4551	0.0140846
rs4809330	2070243	ZBTB46	0.251353	0.801541	1.14729	0.251262	-2.18295	0.0290394	1.97929	0.0477835	0.528932	0.596852	-0.393012	0.69431	0.0696852	0.944444	0.280626	0.778997	-0.720061	0.471488	-0.0816363	0.934936
rs872263	50341	SCAMP2	1.42023	0.155541	0.567799	0.570171	0.115354	0.908164	1.5013	0.133278	0.359922	0.718905	0.944945	0.344687	-0.663132	0.507246	0.918136	0.358548	0.0743992	0.940693	0.568485	0.569706
rs11903757	840286	-	-1.65699	0.0975211	-2.19438	0.0282079	1.62635	0.103874	-0.864713	0.387197	-2.48631	0.0129075	-2.44384	0.014532	1.80308	0.0713752	-2.42459	0.0153256	0.623864	0.532717	-1.12933	0.258759
rs3219341	6180064	NR1H2	-0.28205	0.777905	1.74738	0.0805714	-0.315369	0.752482	2.20088	0.0277446	2.17037	0.0299788	1.6061	0.108252	0.766212	0.44355	1.83519	0.0664768	1.95661	0.0503939	3.22748	0.00124887
rs10817475	6100441	PRPF4	-0.904954	0.36549	-1.15634	0.247544	1.06004	0.289129	-1.61092	0.107198	-0.876968	0.380504	-0.594417	0.552233	-0.821012	0.41164	-1.35347	0.175904	-1.58079	0.113926	-1.0805	0.27992
rs2838762	3400497	-	0.542021	0.587804	1.36532	0.172152	-0.547311	0.584165	0.990314	0.322021	0.614195	0.539087	-0.0878261	0.930015	-1.69186	0.0906731	-0.19748	0.843452	-0.627935	0.530047	0.106411	0.915256
rs2971408	6350358	ZMYM1	-0.770826	0.44081	3.16093	0.00157268	-1.88363	0.0596157	2.29229	0.0218892	2.22178	0.0262983	1.5255	0.127135	-1.98024	0.0476769	-0.795631	0.426246	0.374686	0.707894	-0.350146	0.726229
rs17147644	2370301	CTD-3074O7.5;PELI3	1.6802	0.0929176	1.3132	0.189114	-1.21718	0.223537	-0.22634	0.820937	3.0304	0.0024423	1.994	0.0461516	0.630343	0.52847	1.11084	0.266638	2.23239	0.025589	1.87483	0.0608165
rs7937532	1300674	RP11-805J14.5;FADD	-0.224923	0.822039	0.250503	0.802199	-0.458182	0.646822	-0.535958	0.591987	1.44533	0.148366	0.723621	0.469298	0.0581545	0.953626	-1.60025	0.109544	1.39755	0.162247	-0.151076	0.879916
rs2250818	110450	SLC12A9	0.905435	0.365235	0.255332	0.798467	0.126335	0.899467	-0.330591	0.740954	0.485066	0.62763	1.48495	0.137558	0.24293	0.80806	0.732668	0.463761	1.09877	0.27187	1.83084	0.0671248
rs11586424	5270520	FAIM3	0.0190645	0.98479	-0.00434582	0.996533	1.35781	0.174523	-1.06784	0.285592	-0.579058	0.56255	-0.412821	0.679738	-0.206808	0.83616	1.95306	0.0508124	-0.195097	0.845317	0.207291	0.835783
rs7902802	3710598	PSTK	1.17227	0.241089	1.45772	0.144917	-1.67902	0.0931481	-0.200739	0.840903	2.5563	0.0105792	1.07086	0.284231	0.506304	0.612643	2.3086	0.0209659	1.25407	0.209817	1.4439	0.148766
rs11209261	1570441	-	0.00114575	0.999086	-0.537032	0.591246	0.222703	0.823767	-1.49738	0.134295	0.627711	0.530193	-0.517752	0.604631	1.71057	0.0871607	1.08213	0.279193	1.88057	0.0600298	2.85408	0.00431619
rs580924	7380553	ZNF24	-0.410884	0.681157	0.314139	0.753416	0.188505	0.850481	0.0562408	0.95515	1.21511	0.224322	0.752956	0.451476	-0.697958	0.485203	1.26612	0.205471	0.716541	0.473657	0.926992	0.35393
rs140522	6760286	-	1.50591	0.13209	0.0516156	0.958835	-0.759758	0.447399	-0.488728	0.625034	-0.123507	0.901706	0.990262	0.322046	1.09162	0.274999	2.80737	0.00499471	-0.105377	0.916077	1.45148	0.146647
rs2513272	2360121	MTL5	1.1119	0.266182	-0.0152872	0.987803	-1.15502	0.248083	-0.00624371	0.995018	1.47116	0.141248	0.186506	0.852048	1.61418	0.106489	1.33263	0.182655	1.80805	0.0705983	2.8779	0.00400327
rs2647045	3940477	TAP2	1.92887	0.0537473	0.898716	0.368804	-0.206823	0.836148	0.271719	0.785838	0.545867	0.585157	2.54282	0.0109961	0.016345	0.986959	1.94556	0.0517073	0.221603	0.824623	0.550094	0.582255
rs662083	1400609	-	-0.517447	0.604844	0.866122	0.386424	-1.7921	0.0731165	-1.29021	0.196978	-0.191471	0.848156	-0.975304	0.329409	0.404295	0.685996	0.660536	0.50891	0.447226	0.654712	0.0491873	0.96077
rs2494250	50192	DARC	2.26598	0.0234526	-0.835348	0.403522	3.06622	0.00216782	0.28944	0.772245	0.768885	0.441961	1.31848	0.187343	0.131775	0.895162	0.722687	0.469872	0.146532	0.883502	1.01489	0.310158
rs17245425	670288	CTD-3064H18.6;ZNF540;ZNF571	1.2868	0.198164	1.44962	0.147165	-0.769199	0.441775	0.154131	0.877506	1.353	0.176055	1.40546	0.159886	-1.1843	0.236293	0.056763	0.954734	0.0878616	0.929987	1.34461	0.178752
rs35666	4730369	BTG1	-1.22007	0.222437	-1.13186	0.257694	0.471316	0.637415	-2.06255	0.0391554	-0.473545	0.635824	-1.5633	0.117982	1.2094	0.226509	1.58428	0.11313	0.585249	0.55838	-0.766202	0.443556
rs2016609	2360736	RP4-545C24.1;RP4-798C17.6;ARHGEF35	0.247721	0.80435	-0.876712	0.380643	-0.680533	0.496167	-0.0329578	0.973708	0.496108	0.619818	0.654298	0.51292	1.10799	0.267866	1.26827	0.204701	1.0871	0.276991	1.27491	0.202342
rs48524	2370021	ZNF274	-0.181812	0.85573	-0.192985	0.846971	0.267262	0.789267	1.04713	0.295042	0.0115759	0.990764	-0.301041	0.763383	0.206452	0.836438	-0.80351	0.42168	-0.2759	0.782625	0.898749	0.368786
rs1025438	7550608	TMEM9B	1.01661	0.309339	-0.870944	0.383785	1.11925	0.263032	-0.490789	0.623575	-0.998991	0.317799	0.102511	0.918351	0.536976	0.591284	0.337683	0.735602	0.10651	0.915178	1.04738	0.294924
rs11150805	7050500	ARL16	1.44543	0.148337	2.61496	0.00892385	-1.2568	0.208826	2.55492	0.0106211	3.13613	0.00171196	2.81207	0.00492236	3.40354	0.000665186	2.10979	0.0348767	4.81675	1.45914e-06	4.11944	3.79789e-05
rs9508622	60370	MPHOSPH8	-0.154261	0.877404	0.750686	0.452841	0.399723	0.689361	1.23727	0.215988	1.95732	0.05031	0.592995	0.553184	0.39238	0.694777	0.609264	0.54235	0.345739	0.729539	0.642431	0.520594
rs4324873	2340348	KLHDC10	-0.840411	0.400678	0.402491	0.687323	-0.0525229	0.958112	0.215376	0.829474	0.17721	0.859343	-0.374622	0.707942	0.449736	0.652901	1.7576	0.0788148	0.670594	0.502479	0.142729	0.886504
rs1989946	3800678	NUP88	0.642476	0.520564	0.229041	0.818837	-0.258379	0.796114	0.204458	0.837995	1.24114	0.214553	0.858881	0.390406	0.630583	0.528313	-0.409117	0.682454	0.539643	0.589443	2.50298	0.0123152
rs3210186	520639	TIGD5	-1.27228	0.203272	0.167961	0.866614	-0.0850136	0.932251	2.09109	0.0365198	0.0267761	0.978638	-2.11549	0.034388	1.49399	0.135179	0.367652	0.713133	1.60898	0.10762	1.05152	0.293019
rs1270209	2650220	FSTL1	1.64265	0.100455	-1.22672	0.219929	1.88527	0.0593929	-0.48774	0.625734	1.40624	0.159653	1.59934	0.109745	1.69143	0.090754	-0.783389	0.433399	1.881	0.0599717	2.75846	0.00580748
rs12978470	4890382	ILVBL	-0.363899	0.715934	0.715652	0.474206	-0.127816	0.898295	0.734667	0.462542	0.659452	0.509606	-0.0432638	0.965491	0.488828	0.624964	-0.834214	0.404161	0.76124	0.446514	-0.378458	0.70509
rs1211375	6980192	HBZ;HBM	-1.1243	0.260886	-3.38253	0.000718207	5.26507	1.40138e-07	-2.16384	0.0304765	-2.71368	0.006654	-2.63065	0.00852224	0.67848	0.497468	-2.61495	0.00892394	-1.35068	0.176797	-0.0760257	0.939399
rs4756042	6580164	PHF21A	3.01033	0.00260965	-0.35158	0.725153	0.0571914	0.954393	0.363593	0.716162	1.23007	0.218672	2.27814	0.0227183	0.970059	0.332017	0.786917	0.431331	1.13308	0.25718	2.1957	0.0281136
rs11959928	610152	C9;DAB2	-0.141986	0.887091	-1.97802	0.0479265	0.258581	0.795959	-1.48439	0.137706	-0.86761	0.385608	-0.698246	0.485024	2.73145	0.00630561	0.315282	0.752548	1.00947	0.312748	0.297759	0.765887
rs2302458	4780086	CRK	0.637465	0.523822	-0.801064	0.423095	1.28538	0.198659	-0.555749	0.578382	0.584021	0.559206	0.00614808	0.995095	-0.0199731	0.984065	0.554056	0.57954	0.390625	0.696074	0.756502	0.449348
rs2304596	2650598	CYP4V2;KLKB1	1.43154	0.152274	4.69663	2.64484e-06	-2.96251	0.0030514	2.76713	0.00565513	5.75165	8.83761e-09	4.87805	1.07138e-06	-1.31176	0.1896	1.16145	0.245457	1.86686	0.0619205	2.84609	0.00442603
rs8102476	630470	CTB-102L5.4;C19orf33	-1.15395	0.248519	-0.809562	0.418192	1.77372	0.0761088	-0.18985	0.849426	-2.26066	0.0237801	-1.65712	0.0974952	-0.732106	0.464104	0.420355	0.674226	-2.64696	0.00812199	-1.24345	0.213704
rs3761847	1340241	C5	1.05825	0.28994	2.74128	0.00612006	-0.988682	0.322819	0.999432	0.317586	2.64652	0.00813236	1.64003	0.100999	-1.51824	0.128954	2.99485	0.00274581	1.28276	0.199578	1.32784	0.184232
rs715544	6900440	SLC25A1	1.29308	0.195982	-2.80266	0.0050683	1.27703	0.201592	-1.74478	0.0810232	-1.07762	0.281202	-0.276061	0.782501	0.893623	0.371524	0.728262	0.466453	-0.490084	0.624075	-0.534087	0.593281
rs8074617	730543	RPAIN;AC004148.1;CTC-524C5.2	0.892535	0.372106	0.727916	0.466665	-0.605392	0.544918	-0.519829	0.603182	2.6317	0.00849582	1.69227	0.0905948	-0.857855	0.390973	1.31786	0.187551	1.16016	0.245985	1.40115	0.161169
rs10787533	2570112	ABLIM1	2.00267	0.045213	0.50221	0.61552	0.734519	0.462632	0.416534	0.677019	1.65393	0.0981409	2.08306	0.0372456	-1.44225	0.149233	-0.90645	0.364698	-0.355124	0.722497	0.860337	0.389603
rs4665736	3800050	CENPO;ADCY3	-3.51011	0.000447921	4.16995	3.04664e-05	-1.78851	0.0736942	3.55411	0.000379258	1.76802	0.0770573	-2.13389	0.0328516	-0.354642	0.722858	-3.87191	0.000107985	0.35618	0.721706	-0.437717	0.661591
rs11051061	6200682	CAPRIN2	0.710531	0.477375	-0.288368	0.773065	1.69007	0.0910142	0.62691	0.530718	0.81321	0.416098	2.04921	0.0404418	-0.691295	0.48938	1.69189	0.0906669	-0.00708733	0.994345	0.542916	0.587188
rs564304	3190632	-	0.161209	0.871929	-0.983004	0.325606	0.194702	0.845626	0.28602	0.774863	-1.4031	0.160586	-0.714405	0.474977	-0.877735	0.380088	-1.13981	0.254365	-1.06159	0.288423	-0.744077	0.45683
rs2860580	110255	TRIM10	-1.39088	0.164261	-2.10571	0.0352296	2.70618	0.00680621	-2.41711	0.0156445	-2.30244	0.0213105	-1.77568	0.0757858	2.73363	0.00626401	-1.29645	0.19482	0.674976	0.499691	-0.590045	0.55516
rs2006933	3420541	TMEM97	-0.527617	0.597765	-1.22208	0.221677	0.362524	0.71696	-0.594521	0.552164	-1.98491	0.0471542	-1.06067	0.288839	1.67479	0.0939763	-0.538983	0.589899	-0.0942555	0.924906	-1.04043	0.29814
rs10776856	2850112	UBAC1	-0.356776	0.721259	-0.680764	0.496021	2.35314	0.0186155	-1.47724	0.13961	0.24935	0.80309	0.533758	0.593509	0.302327	0.762403	0.265201	0.790855	0.772435	0.439857	0.102485	0.918371
rs531613	7510647	CACNA1E	3.49283	0.000477923	-1.65771	0.097376	0.124051	0.901275	0.202348	0.839645	-0.60283	0.546622	1.06898	0.285079	0.312009	0.755034	2.03717	0.0416332	-1.11192	0.266172	1.91215	0.0558569
rs3733103	5360484	LZTFL1;CCR9	-1.05467	0.291575	1.03436	0.30097	0.555956	0.578241	1.86687	0.0619192	1.01185	0.311609	-0.00917459	0.99268	-0.294382	0.768466	0.371542	0.710234	-0.274097	0.78401	0.78336	0.433415
rs2292500	2510692	SNRNP35	1.40733	0.15933	1.13095	0.258077	-0.955493	0.339328	-0.409317	0.682307	0.599781	0.548652	1.26965	0.204208	-1.69237	0.0905745	-0.661604	0.508225	-0.73788	0.460588	-0.18112	0.856273
rs2185827	6370215	RSBN1	1.23783	0.21578	-0.394804	0.692988	-0.475931	0.634123	-0.405536	0.685083	-0.515959	0.605883	1.10446	0.269393	0.225061	0.821932	0.888108	0.374483	-0.767645	0.442698	1.90635	0.0566042
rs1211375	4150563	MPG;NPRL3	2.04058	0.0412925	0.301563	0.762985	-0.173476	0.862277	1.45502	0.145663	1.14332	0.252904	1.41534	0.15697	1.58705	0.112501	1.69254	0.0905421	1.31582	0.188236	2.98501	0.00283566
rs1913517	6620022	WDFY4	1.86114	0.0627248	0.540807	0.58864	0.162356	0.871026	0.225916	0.821267	1.00916	0.312899	1.59856	0.109918	0.626259	0.531145	1.28055	0.200352	1.46139	0.143908	2.29338	0.021826
rs1962412	460040	RP11-463M16.4;ATP5G1	-1.00445	0.315161	1.66773	0.0953693	-1.22276	0.221419	1.34039	0.180117	0.396009	0.692099	-0.498088	0.618422	-1.65456	0.0980132	-0.315145	0.752651	-1.64608	0.099747	-2.31854	0.0204202
rs176095	4610044	EGFL8;AGPAT1	-1.49029	0.136149	-0.535432	0.592352	0.0893229	0.928825	-0.788216	0.43057	-0.296548	0.766812	-2.04054	0.0412969	-0.648903	0.516401	-0.481856	0.629908	-0.0639106	0.949041	-1.74476	0.0810262
rs11730818	2680670	FNIP2;C4orf45	-0.496579	0.619486	1.55525	0.119886	0.0202306	0.983859	1.8634	0.0624054	0.46312	0.643279	0.680851	0.495966	0.145424	0.884376	-2.8179	0.00483391	0.305838	0.759728	-0.227109	0.820339
rs4838131	5860463	NEK6	1.51046	0.130925	-0.793231	0.427643	1.12138	0.262125	-0.19246	0.847382	-0.513121	0.607866	0.639785	0.522313	-0.425142	0.670733	1.56411	0.117793	-0.870316	0.384128	0.404752	0.68566
rs7617480	70707	WDR6;DALRD3	-0.196936	0.843878	0.673803	0.500437	-1.36613	0.171899	1.13541	0.256204	0.894187	0.371222	0.41888	0.675304	-0.106245	0.915388	0.84186	0.399867	0.991413	0.321484	0.127396	0.898627
rs3852689	580154	COG8;PDF;RP11-343C2.8	-2.54693	0.0108676	0.10428	0.916947	0.330767	0.740821	-0.998425	0.318074	-0.806067	0.420204	-1.95558	0.0505148	1.50986	0.131078	-1.47689	0.139704	1.10423	0.269495	-0.188225	0.8507
rs10403200	2060491	ZNF565	-0.8828	0.377344	-0.460886	0.64488	1.45806	0.144823	0.31431	0.753286	0.103185	0.917816	-0.610407	0.541592	1.91993	0.0548663	-0.213725	0.830762	1.76286	0.0779234	1.58488	0.112994
rs941686	1450097	DDI2	0.830204	0.406423	-1.58123	0.113826	1.34079	0.179989	-0.301474	0.763053	-1.48184	0.138384	-0.127263	0.898732	0.185582	0.852772	0.151298	0.879741	0.229022	0.818852	1.18622	0.235536
rs404005	2490564	SLC8A1-AS1	0.758202	0.44833	0.679049	0.497107	-0.279018	0.780231	0.757601	0.44869	0.65677	0.511329	0.521408	0.602082	0.51609	0.605791	-0.885667	0.375797	0.219395	0.826343	1.45921	0.144508
rs13201129	5340138	MRPS18B	-0.156683	0.875494	1.42176	0.155097	0.620461	0.534954	1.26666	0.205276	1.47189	0.14105	0.428614	0.668204	-0.937101	0.348707	1.3867	0.165532	0.824505	0.409653	1.47972	0.138948
rs6781355	2030400	COLQ	-0.7578	0.448571	-0.184712	0.853455	-0.63862	0.52307	1.2334	0.217427	0.612966	0.539899	-0.839352	0.401272	1.53306	0.125262	-1.59621	0.110441	1.0782	0.280944	0.885042	0.376134
rs1996663	4830458	AMIGO3;GMPPB	-0.883752	0.37683	1.28292	0.199521	0.15177	0.879368	1.4876	0.136857	0.919512	0.357828	0.560968	0.574819	-0.833681	0.404461	-0.498474	0.61815	0.065063	0.948124	-0.665932	0.505454
rs1109451	5670075	PAFAH1B1	-0.531457	0.595102	1.19272	0.232977	-0.602325	0.546958	1.84333	0.0652816	1.23266	0.217701	0.401561	0.688007	-0.925238	0.354842	-0.192118	0.84765	1.20799	0.227051	0.652036	0.514378
rs160441	4150520	RIPK2	-0.424442	0.671243	1.17034	0.241865	-0.318551	0.750067	-0.280644	0.778984	1.56988	0.116444	1.06087	0.288751	-0.325274	0.744974	0.787738	0.43085	0.368389	0.712583	0.309297	0.757096
rs10472251	6370187	RAI14	-0.825296	0.409204	0.132131	0.894881	-0.436592	0.662407	-0.156076	0.875973	0.314729	0.752968	-1.17054	0.241784	-0.52708	0.598138	-1.84783	0.0646264	-0.538054	0.59054	-1.45094	0.146796
rs965469	360445	ITPA	0.379705	0.704164	1.18481	0.236094	-0.424123	0.671476	0.685748	0.492872	0.261296	0.793864	0.151202	0.879817	0.0999504	0.920384	1.12679	0.259833	0.613934	0.539259	-0.301611	0.762949
rs8058133	5340167	RFWD3	-0.162001	0.871305	-0.231289	0.81709	-0.646676	0.517842	-0.122708	0.902338	1.38829	0.165048	2.53754	0.0111635	1.89682	0.0578518	0.462854	0.643469	1.47016	0.141519	0.694808	0.487176
rs7099831	2450435	STK32C	0.387467	0.698411	0.562883	0.573514	-0.262539	0.792906	1.50482	0.132369	-0.983825	0.325201	-1.47844	0.139289	-0.0718378	0.942731	0.770402	0.441062	-1.77047	0.0766485	0.909572	0.363048
rs2453994	2480241	ATP6V1C1	4.08763	4.35794e-05	1.38451	0.166203	0.461661	0.644325	-0.038175	0.969548	3.29757	0.000975238	4.98106	6.32377e-07	-0.593043	0.553152	2.7602	0.00577666	1.12546	0.260393	3.24482	0.00117525
rs1558324	6250487	CD9	-0.635387	0.525176	0.73402	0.462936	-0.35529	0.722372	1.03974	0.298462	-0.605871	0.544601	-0.849471	0.395619	2.41075	0.0159196	0.792703	0.427951	0.740241	0.459154	0.760386	0.447024
rs1540641	3710053	APBA2	1.02317	0.306226	-1.30725	0.191128	0.403988	0.686222	-1.03914	0.298739	-0.4284	0.66836	0.323269	0.746492	0.559601	0.575751	1.20484	0.228264	0.152015	0.879175	1.93837	0.0525776
rs1275480	6220746	GLIPR1	-0.626082	0.531261	0.355939	0.721886	0.816343	0.414304	-0.379351	0.704428	2.00386	0.045085	0.829189	0.406998	1.31441	0.188707	0.321415	0.747896	2.24146	0.0249965	3.25672	0.00112709
rs11015564	5720162	ANKRD26	0.605528	0.544828	0.392858	0.694424	-0.685122	0.493267	-0.303549	0.761471	1.24118	0.214538	0.786495	0.431577	0.70557	0.480456	0.396292	0.69189	1.39808	0.16209	0.663071	0.507285
rs2513038	6770270	-	0.664001	0.50669	0.580439	0.561619	-0.585673	0.558095	1.59128	0.111546	2.63158	0.00849887	1.65471	0.0979829	3.77623	0.00015922	-0.093758	0.925301	4.38144	1.17898e-05	3.46831	0.000523739
rs259919	620376	PPP1R11	-0.983834	0.325197	0.992148	0.321125	-0.296419	0.76691	1.82427	0.0681114	-0.169813	0.865157	-0.436781	0.66227	-0.978006	0.328071	-2.11986	0.0340182	-0.338707	0.73483	-0.0604081	0.951831
rs364897	6110605	KRTCAP2	0.485541	0.627293	0.630181	0.528576	-1.27169	0.203485	-0.317557	0.750821	1.50782	0.131602	1.26245	0.206785	0.392896	0.694396	1.7601	0.0783916	2.04709	0.040649	0.611596	0.540805
rs5742743	4220181	DAD1	-0.547635	0.583943	0.502802	0.615104	-2.84217	0.00448074	-0.247466	0.804548	1.03837	0.299099	0.127751	0.898346	1.5003	0.133538	-1.39971	0.1616	1.04456	0.296228	-1.04713	0.295039
rs2439286	3420458	NRG1	2.16142	0.0306626	-0.227181	0.820283	1.05264	0.292505	-0.877463	0.380235	-0.822019	0.411066	1.37185	0.170112	-0.656735	0.511351	0.654558	0.512752	-0.949656	0.342287	1.50097	0.133364
rs2070063	2070367	SERTAD2	1.92302	0.0544777	-0.167952	0.866621	-0.901409	0.367371	-0.820289	0.412051	0.582774	0.560046	1.87121	0.0613156	0.496316	0.619671	0.131348	0.8955	0.408194	0.683132	0.745172	0.456168
rs12416248	6250168	-	3.51824	0.000434415	-0.154209	0.877445	-0.679601	0.496757	0.0181207	0.985543	2.1555	0.0311231	3.7327	0.000189435	2.64183	0.00824596	3.27454	0.00105835	3.20752	0.00133885	3.64986	0.000262385
rs12993457	5700523	C2orf29	0.917669	0.358792	-0.495079	0.620545	0.699678	0.484128	0.311791	0.755199	0.162365	0.871018	0.0344712	0.972501	0.519927	0.603114	1.24597	0.212774	-0.00324599	0.99741	1.28452	0.198962
rs12642709	1260053	LRP2BP	-0.756696	0.449232	-0.67816	0.49767	1.22467	0.220701	0.520305	0.602851	-0.558611	0.576427	-0.315837	0.752126	0.485407	0.627387	-1.69783	0.0895407	-0.736898	0.461184	0.434736	0.663754
rs12902285	6380241	AC068831.6;UNC45A	0.197229	0.843648	0.060711	0.951589	0.651007	0.515042	0.653267	0.513584	-0.632708	0.526924	0.134325	0.893145	-0.127486	0.898556	1.01138	0.311834	-0.702169	0.482574	-1.08034	0.27999
rs495392	1190392	KL	0.239829	0.810463	-0.643117	0.520148	1.26473	0.205966	1.59508	0.110693	1.07474	0.282493	0.779539	0.435662	1.36103	0.173504	0.835243	0.403581	1.75544	0.0791838	0.66285	0.507426
rs1009077	1770333	RP11-33B1.1;PDE5A	1.73511	0.0827208	-0.397435	0.691047	1.97158	0.0486573	-0.0138835	0.988923	0.322435	0.747123	0.826677	0.40842	-0.626741	0.530829	0.600926	0.547889	-0.693134	0.488225	1.38851	0.164983
rs2016469	5700224	IFT57	-0.855639	0.392197	0.79499	0.426619	-0.815889	0.414564	0.0823171	0.934395	0.584149	0.55912	-0.708111	0.478876	-1.30014	0.193554	-0.0727768	0.941984	0.206058	0.836746	-1.44468	0.148549
rs7711117	7320402	APBB3	0.999206	0.317695	-1.06171	0.288368	0.240818	0.809696	-0.414805	0.678285	-2.36924	0.0178245	-0.65274	0.513924	-0.571979	0.567336	0.571632	0.567572	-2.76153	0.00575313	-0.395297	0.692624
rs11578466	4230753	HLX	1.16295	0.244852	-0.858448	0.390645	2.09834	0.0358751	-0.175269	0.860869	-1.81702	0.0692133	-0.627482	0.530343	-1.94688	0.0515491	0.456268	0.648198	-3.65065	0.000261575	-1.66412	0.0960882
rs2046823	6250435	ARHGEF3	-1.19943	0.230359	0.788115	0.430629	-1.06715	0.285903	2.61042	0.00904316	0.75806	0.448415	-0.569262	0.569178	-0.370739	0.710832	-0.19942	0.841934	0.132685	0.894442	0.519925	0.603116
rs12600635	1090075	MPRIP;FLCN	2.90396	0.0036847	0.773841	0.439025	-1.35493	0.175439	0.789134	0.430034	2.59665	0.00941373	2.40119	0.0163419	0.994076	0.320186	2.06532	0.0388927	1.61222	0.106915	4.59343	4.36029e-06
rs11052552	5490341	CLEC2D	-0.701038	0.483279	0.315104	0.752683	0.540438	0.588895	0.581939	0.560608	-0.984818	0.324713	-1.07837	0.280871	0.11832	0.905814	-0.625757	0.531474	-1.4007	0.161304	-0.810321	0.417756
rs7359	610768	TAPT1	0.0343184	0.972623	0.386887	0.69884	-1.34633	0.178197	0.0889064	0.929156	0.536962	0.591294	0.293442	0.769184	1.61504	0.106302	0.266313	0.789998	1.1203	0.262585	1.32903	0.183839
rs4899161	5720392	CHURC1-FNTB;RAB15	-1.35301	0.176053	-1.66029	0.0968551	0.694747	0.487214	-0.725734	0.468002	-1.26802	0.204793	-1.41377	0.157428	1.16418	0.244352	-1.31521	0.188438	0.142874	0.88639	-1.51176	0.130596
rs345187	6380672	CA4	0.986379	0.323947	-0.355226	0.72242	2.26551	0.0234817	-0.832118	0.405342	-0.69451	0.487362	0.751052	0.452621	-0.0772379	0.938434	-0.0758242	0.939559	-0.325985	0.744436	1.09907	0.271735
rs6487582	2070474	RP11-421F16.3;TM7SF3	-1.43952	0.150002	0.381214	0.703044	1.05936	0.289434	0.842461	0.39953	1.21437	0.224608	-0.912129	0.361701	2.38586	0.0170393	0.444583	0.656621	2.41524	0.0157249	2.2916	0.0219289
rs12617051	870528	-	1.9879	0.0468224	-1.53583	0.124579	2.75593	0.00585247	-1.89511	0.0580775	0.337681	0.735603	0.454823	0.649236	4.08631	4.38292e-05	2.59823	0.00937058	2.10974	0.0348806	5.99852	1.99123e-09
rs13712	7560274	MLH3	2.5932	0.00950867	2.64502	0.00816858	-1.21649	0.223799	2.16733	0.03021	2.30912	0.0209371	2.32691	0.0199701	-3.41477	0.000638359	3.68773	0.000226261	-1.3236	0.185636	0.781078	0.434757
rs4463020	3850474	PDE6B	0.840787	0.400467	-0.511633	0.608908	0.228731	0.819078	0.94673	0.343777	0.00803367	0.99359	-0.0432666	0.965489	-0.971517	0.331291	1.42534	0.15406	-0.229721	0.818308	1.69118	0.090802
rs4656940	3170703	LY9	1.52544	0.12715	-1.23131	0.218208	1.28108	0.200165	0.0751453	0.940099	-0.196058	0.844565	1.02058	0.307453	1.41688	0.156519	-1.13722	0.255446	1.09174	0.274947	1.21437	0.224605
rs427732	1710332	FAHD1;MEIOB	-0.765614	0.443906	2.36178	0.0181873	-1.57218	0.115909	2.06343	0.0390714	1.27318	0.202954	0.0249314	0.98011	-0.244876	0.806552	-0.553221	0.580112	1.53416	0.12499	0.102038	0.918726
rs6851219	4810435	SCARB2	0.316022	0.751986	-0.0441552	0.964781	0.158752	0.873864	-0.511419	0.609057	0.43666	0.662358	0.761673	0.446255	0.819514	0.412493	0.36486	0.715216	0.296426	0.766905	0.114458	0.908875
rs13419523	4730315	MERTK	0.798997	0.424292	-0.960715	0.336695	0.436925	0.662166	0.452249	0.65109	0.727213	0.467096	0.80005	0.423682	0.344335	0.730594	0.111187	0.911468	-0.057749	0.953949	0.105182	0.916232
rs4237449	2490240	PTPRE	-0.221025	0.825073	0.902348	0.366872	-1.1514	0.249569	0.594504	0.552175	0.372242	0.709712	0.280991	0.778717	-0.604049	0.545811	-1.17361	0.24055	-0.688877	0.490901	-0.606213	0.544373
rs4255791	3850767	SBK1	-1.1324	0.257466	0.813024	0.416204	-1.74143	0.081608	0.669783	0.502996	-0.497993	0.618489	-2.45854	0.0139504	-1.35126	0.176612	-0.563427	0.573144	-1.52915	0.126228	-2.07384	0.0380944
rs969660	5360626	SLC26A8	2.00334	0.0451408	-1.05021	0.293619	0.494296	0.621097	-1.84516	0.065014	0.680685	0.496071	1.5793	0.114267	0.968525	0.332782	0.416545	0.677011	0.367078	0.713561	1.08314	0.278744
rs17171825	870338	EGR1	-1.0406	0.298061	-0.659427	0.509622	1.60728	0.107992	-0.925532	0.354689	-0.97416	0.329977	-2.14648	0.0318347	2.48891	0.0128137	1.17023	0.241907	1.8228	0.0683335	1.38137	0.167165
rs11848070	670037	-	-0.0665091	0.946973	-0.537835	0.590691	0.573704	0.566168	-0.404709	0.685691	0.925826	0.354537	0.827344	0.408042	-0.705337	0.480601	-1.47714	0.139637	0.319191	0.749582	-0.485765	0.627134
rs10759546	6370678	PTBP3	-0.461998	0.644083	-0.144942	0.884757	-0.2241	0.822679	-0.73362	0.46318	-1.13345	0.257026	-1.15088	0.24978	0.351151	0.725475	-0.612727	0.540057	-0.10609	0.915511	-0.321352	0.747943
rs1108842	3940368	MUSTN1;TMEM110-MUSTN1	-1.70184	0.0887849	-0.202378	0.839621	-0.678466	0.497476	-0.192119	0.847649	-0.547822	0.583814	-1.09108	0.275239	-0.1699	0.865089	-0.972873	0.330617	0.243291	0.80778	-1.99558	0.04598
rs9469220	2650156	TAP2	-0.144962	0.884741	0.411747	0.680525	-0.228121	0.819552	0.602205	0.547038	0.172578	0.862983	-0.359143	0.719488	-1.52	0.128512	-0.592517	0.553505	-0.67183	0.501692	-1.78514	0.0742391
rs8014077	7160440	RP11-517O13.3;ARID4A	-1.07406	0.282797	-0.185361	0.852946	-0.0583396	0.953478	-1.04003	0.298325	-0.485753	0.627142	-1.01658	0.309355	-1.15082	0.249805	0.291586	0.770603	-1.1873	0.235109	-0.937875	0.348309
rs2851391	1230047	CBS	4.96735	6.78742e-07	-5.73807	9.57626e-09	3.06205	0.00219825	-4.0284	5.61568e-05	-2.85086	0.00436011	0.227888	0.819733	1.35452	0.175572	-0.604309	0.545638	-0.854876	0.39262	1.43761	0.150544
rs4968214	6220382	RP11-186B7.4;CD68	1.32653	0.184665	3.52306	0.000426597	-1.85077	0.0642022	3.09134	0.00199253	4.62781	3.69562e-06	3.85922	0.000113749	-0.175853	0.860409	3.1338	0.00172561	2.0583	0.0395617	4.03346	5.49627e-05
rs1000410	3460270	PLCG1;ZHX3	-1.00689	0.313986	-0.189916	0.849375	-0.244739	0.806658	0.610767	0.541354	-1.67141	0.0946417	-0.964597	0.334747	-0.355682	0.722079	-2.43194	0.0150181	-1.28351	0.199315	-2.03734	0.0416162
rs10903129	5220615	C1orf63;RHD	2.08951	0.0366622	-1.90468	0.0568212	7.47656	7.62945e-14	-0.533058	0.593993	0.148278	0.882123	0.956326	0.338908	1.56232	0.118213	2.79152	0.00524604	0.331464	0.740294	4.99648	5.83862e-07
rs17413652	2940224	POMGNT1	0.800123	0.423639	-0.168078	0.866522	-0.39948	0.689539	0.808862	0.418595	-0.794605	0.426844	0.758489	0.448159	0.66891	0.503553	-0.271088	0.786324	-0.0298597	0.976179	1.63688	0.101655
rs6938239	7320110	C6orf106	-0.879786	0.378975	-0.144725	0.884928	-0.97622	0.328955	0.633666	0.526299	-0.583922	0.559273	-0.900911	0.367636	-0.850968	0.394787	-1.20807	0.227019	-0.578819	0.562711	-1.62086	0.105048
rs1137295	1300601	ST3GAL1	2.19258	0.0283379	0.166927	0.867428	2.58422	0.00975982	-0.490357	0.623881	0.480682	0.630742	0.900256	0.367984	-2.90119	0.00371747	0.0389769	0.968909	-2.32729	0.01995	0.177801	0.858879
rs10801555	380424	CFH	0.238517	0.81148	0.328326	0.742665	-0.30547	0.760008	0.87198	0.383219	1.73834	0.0821514	1.69772	0.0895609	-0.810135	0.417863	0.884201	0.376588	-0.00979642	0.992184	0.155229	0.876641
rs3813609	5360537	ARHGAP30	0.594773	0.551995	0.706572	0.479832	-1.38183	0.167023	0.926191	0.354347	2.30953	0.0209144	1.32376	0.185582	-0.772279	0.439949	-0.215112	0.82968	0.816446	0.414245	0.79621	0.42591
rs9890539	6110367	PIGL	-1.96133	0.0498408	1.03853	0.299024	-1.48157	0.138454	1.02831	0.303803	1.50123	0.133296	1.59174	0.111444	-0.231704	0.816768	1.942	0.0521367	-0.147736	0.882551	0.693375	0.488074
rs10487157	580133	MOSPD3	1.66598	0.0957171	-2.06871	0.0385731	0.458923	0.64629	-0.987651	0.323323	0.0980153	0.92192	0.66515	0.505954	1.28476	0.198877	-0.767294	0.442907	-0.108585	0.913532	0.923212	0.355897
rs7359922	6220600	ERVK3-1	-1.06998	0.284629	0.22034	0.825606	-0.00673105	0.994629	0.802995	0.421978	-0.395362	0.692576	-1.10868	0.267567	0.28938	0.77229	-0.413334	0.679362	-0.55342	0.579976	0.220246	0.825679
rs163133	6900309	ARSB	0.772764	0.439662	-0.0916896	0.926945	-1.08836	0.276438	0.421422	0.673447	0.226925	0.820482	-0.135196	0.892457	-0.215537	0.829349	1.48531	0.137463	-0.523728	0.600468	-1.18162	0.237357
rs2354800	1510040	DYRK1B	-0.567675	0.570256	2.16051	0.0307332	0.604709	0.545372	0.0822459	0.934451	0.534514	0.592986	-0.219469	0.826285	-0.165034	0.868917	-0.624376	0.53238	0.83604	0.403132	0.823085	0.410459
rs585522	2350192	RP11-197N18.2;ARL6IP4	-0.919448	0.357861	-0.515878	0.60594	0.262924	0.792609	-1.55008	0.121122	-1.42014	0.155567	-1.50376	0.132644	-0.637165	0.524017	0.13129	0.895546	-2.32572	0.0200336	-3.3937	0.00068954
rs3087637	4230403	NUMB	0.256314	0.797708	0.434896	0.663638	-1.48747	0.136891	0.198885	0.842353	0.245526	0.806049	-0.0867825	0.930844	-0.142754	0.886484	1.30508	0.191866	0.174802	0.861235	1.27092	0.203758
rs9816801	830762	NDUFB5	-0.646534	0.517934	0.79975	0.423855	-0.631981	0.527399	0.720545	0.47119	1.15062	0.249888	-0.369322	0.711888	-0.322358	0.747182	-0.780744	0.434953	0.958245	0.337939	0.144114	0.88541
rs7530189	3830095	DFFB	-0.479229	0.631775	-1.74964	0.0801805	0.560002	0.575478	-1.97909	0.0478063	-0.418505	0.675578	-0.879052	0.379373	0.770411	0.441056	-0.00289825	0.997688	-0.239476	0.810736	0.0524833	0.958144
rs2208519	5560193	BCAS4	-1.90309	0.0570287	-0.71706	0.473337	0.471254	0.637459	1.90937	0.0562143	-2.29625	0.0216615	-3.51659	0.000437124	1.78433	0.0743699	-2.36021	0.0182645	-0.4918	0.622861	-1.19865	0.230666
rs11542583	6280482	COG8;RP11-343C2.7;NIP7	0.593659	0.55274	1.0865	0.277258	0.284293	0.776186	0.53986	0.589293	0.796588	0.425691	0.790898	0.429004	0.291322	0.770805	0.869723	0.384452	-0.273372	0.784567	0.105228	0.916195
rs12033376	6060592	GNAI3	2.01999	0.0433845	3.99607	6.44019e-05	-2.54617	0.0108911	2.48891	0.0128134	6.593	4.3102e-11	3.92742	8.58616e-05	2.11439	0.0344818	2.275	0.0229056	5.62574	1.84719e-08	4.72096	2.34732e-06
rs2290416	520639	TIGD5	0.0941309	0.925005	-0.312082	0.754978	-0.148433	0.882001	1.25647	0.208944	-0.384191	0.700837	-0.684139	0.493887	-1.09248	0.274622	0.263206	0.792392	-1.08035	0.279985	0.647074	0.517584
rs299085	5310475	RAD17	0.240618	0.809851	1.62855	0.103409	-0.614122	0.539135	1.17583	0.239663	0.434645	0.66382	-0.529694	0.596324	-1.08405	0.278341	0.129295	0.897124	-0.672534	0.501244	-0.22486	0.822088
rs3782908	2900139	SLC48A1	1.23611	0.216416	-4.763	1.90737e-06	8.83265	1.02224e-18	-2.4216	0.0154521	-2.18462	0.0289166	-1.20122	0.229668	3.27424	0.00105945	0.98452	0.32486	0.113856	0.909352	2.09635	0.0360508
rs10432706	5130204	-	0.695033	0.487035	0.99531	0.319585	-0.161713	0.871532	2.36518	0.0180212	0.84185	0.399872	-0.109029	0.913179	0.427885	0.668735	0.371093	0.710568	0.697331	0.485596	1.57677	0.114849
rs11732896	6280008	HSD17B11	0.814258	0.415497	-2.44852	0.0143445	2.604	0.00921439	-0.773461	0.43925	-0.301138	0.76331	-0.0485602	0.96127	4.43549	9.18628e-06	0.843086	0.39918	3.44137	0.000578777	3.68394	0.000229659
rs1521	1260538	ATP6V1G2-DDX39B;ATP6V1G2	1.08554	0.277682	0.758205	0.448328	0.19351	0.84656	0.836227	0.403027	2.50522	0.0122374	1.59806	0.11003	1.84738	0.0646925	0.506247	0.612684	2.69151	0.00711288	1.37526	0.169051
rs11576404	5820195	CLCNKA	1.13489	0.25642	1.26033	0.20755	-0.180044	0.857118	0.562927	0.573484	1.97796	0.0479328	-0.422584	0.672599	0.585898	0.557944	-1.04537	0.29585	2.13397	0.0328449	1.30117	0.193199
rs2272983	4540215	FBXO2	-3.38064	0.000723185	2.77058	0.00559569	-3.2364	0.00121048	1.15464	0.248236	1.07856	0.280785	-2.89506	0.00379082	-0.5029	0.615035	-0.629081	0.529296	0.170229	0.86483	-1.42392	0.154469
rs6137914	4780398	NXT1	-0.243166	0.807877	-0.415982	0.677423	0.724996	0.468454	-1.3291	0.183814	0.0417274	0.966716	-0.787777	0.430827	0.131411	0.89545	0.0745381	0.940582	0.474187	0.635366	0.188856	0.850206
rs17012134	3290044	TTC27	0.416468	0.677067	-1.10771	0.267986	-0.462406	0.64379	-0.598328	0.549621	0.82328	0.410349	1.00744	0.313723	0.968136	0.332976	-0.016817	0.986583	0.654614	0.512716	0.65831	0.510339
rs6501820	4890092	TSEN54	-1.35678	0.17485	-0.589481	0.555538	0.197809	0.843195	-0.945307	0.344502	-1.24068	0.214723	-1.43615	0.150959	0.110742	0.911821	-0.180193	0.857001	-0.443964	0.657069	-1.4056	0.159843
rs2329483	7100437	SNAP29	1.02202	0.30677	0.290923	0.77111	0.386544	0.699094	0.508569	0.611054	2.39891	0.0164439	0.845317	0.397934	3.41077	0.000647806	3.06299	0.00219138	3.18498	0.00144765	4.91914	8.69263e-07
rs2855039	6330184	HBBP1	-2.26662	0.0234136	0.990782	0.321792	-0.305733	0.759808	-0.158195	0.874304	0.0802214	0.936061	-1.4121	0.157921	0.796782	0.425577	-1.0401	0.298296	0.332734	0.739335	0.810085	0.417891
rs1260407	3890500	MRPS21	0.435921	0.662894	1.60145	0.109276	-1.01164	0.311712	1.03804	0.299251	2.04947	0.0404162	0.626371	0.531071	-0.447654	0.654403	-0.484528	0.628011	0.74796	0.454484	2.85272	0.00433471
rs1046089	3850433	HSPA1B	0.10236	0.918471	0.788566	0.430366	-0.0342683	0.972663	0.880038	0.378839	1.46795	0.142118	0.813321	0.416034	1.15109	0.249695	1.48035	0.138781	1.71677	0.0860211	3.07047	0.00213721
rs16889440	7040327	ALDH5A1	1.58162	0.113736	-1.13852	0.254903	2.80746	0.0049934	-0.618998	0.535918	0.435076	0.663507	2.30743	0.021031	-0.351477	0.72523	1.27107	0.203705	-0.954927	0.339615	1.04938	0.294001
rs760645	5130692	DDX17	-0.0129914	0.989635	0.956255	0.338944	0.236147	0.813318	0.0758846	0.939511	-0.139306	0.889208	0.719877	0.471601	0.89714	0.369644	-0.280108	0.779395	0.251017	0.801801	0.932196	0.351235
rs151181	3850767	SBK1	0.612065	0.540495	0.582725	0.560079	-0.290458	0.771466	1.08998	0.275723	0.131334	0.895511	1.31009	0.190165	-1.06966	0.284773	0.952106	0.341043	-1.31053	0.190016	0.597878	0.549921
rs2236653	2100608	RPUSD4	-0.613483	0.539557	0.850991	0.394774	-0.670434	0.502581	2.12621	0.0334855	-0.230607	0.81762	-0.974403	0.329856	-0.850138	0.395248	-0.309966	0.756587	-0.372973	0.709168	-0.456757	0.647846
rs719875	6760468	-	-0.266344	0.789975	-0.562056	0.574078	1.85957	0.0629465	-1.43116	0.152386	-0.493697	0.62152	-0.19606	0.844563	0.716755	0.473525	0.980965	0.32661	0.393936	0.693628	-1.08451	0.278141
rs718391	1780402	RP1-317E23.3;SEPN1;RP1-317E23.6	-1.15897	0.246469	0.344587	0.730405	-0.553464	0.579946	0.0299064	0.976142	1.00379	0.315482	0.36382	0.715992	0.768013	0.442479	1.52152	0.128128	0.141929	0.887136	0.0564874	0.954954
rs6597	3130072	MSLN;RHOT2	1.23599	0.216461	-1.74427	0.0811115	0.937682	0.348408	-0.922101	0.356476	0.675667	0.499252	1.21603	0.223973	1.13769	0.255252	1.22079	0.222166	0.964631	0.33473	0.696107	0.486362
rs10065637	4050600	ANKRD55	0.102071	0.918701	1.52072	0.12833	-1.41953	0.155744	1.18332	0.236682	0.834816	0.403821	-0.611155	0.541097	0.0942535	0.924908	-0.776809	0.437271	0.231221	0.817143	0.479383	0.631666
rs732949	6770131	OLFM4	-0.279202	0.78009	0.975665	0.32923	0.118111	0.90598	1.23812	0.215672	1.38785	0.165184	0.843322	0.399048	0.960087	0.337011	-0.307649	0.75835	0.659933	0.509297	1.11918	0.263063
rs5753037	460039	CTA-85E5.10;MTMR3	0.615547	0.538194	0.432086	0.665679	-0.802338	0.422357	-0.650086	0.515637	0.669945	0.502893	1.49652	0.134518	-1.29994	0.193623	0.842313	0.399613	-0.286235	0.774698	-0.856881	0.391511
rs17126936	1990468	ADD3	-0.496907	0.619254	-0.124578	0.900858	-0.483602	0.628669	-0.997873	0.318341	0.455901	0.648461	0.0013432	0.998928	2.64792	0.00809885	1.8065	0.0708404	1.99047	0.0465392	2.92153	0.00348318
rs17279967	1400435	TOMM70A	0.356537	0.721438	-0.0501969	0.959966	-1.13702	0.255531	-0.0534986	0.957335	0.342543	0.731942	0.0999125	0.920414	1.14414	0.252565	0.107791	0.914161	0.689047	0.490794	1.20703	0.22742
rs2275796	870138	ADORA3	0.835973	0.40317	1.58593	0.112755	-0.622331	0.533724	0.30292	0.761951	0.854562	0.392794	0.866528	0.386201	0.382488	0.702099	1.69397	0.0902704	-0.150421	0.880433	2.46188	0.0138209
rs6690778	3780707	DUSP10	0.520424	0.602768	0.792835	0.427874	-1.10678	0.268391	0.187103	0.85158	1.98801	0.0468102	1.22333	0.221207	-0.489767	0.624299	0.724566	0.468718	1.56886	0.116681	1.75538	0.0791936
rs7147394	3850520	PRMT5-AS1;PRMT5	4.54276	5.55227e-06	-3.37155	0.000747452	3.32561	0.000882259	-2.69923	0.00695012	-0.207386	0.835709	2.89927	0.00374029	2.34327	0.0191157	1.68153	0.0926605	1.93689	0.0527583	3.87943	0.0001047
rs1678156	4200240	AC010149.4;SP100	1.34126	0.179836	0.70966	0.477915	0.519292	0.603557	0.268393	0.788397	-0.852136	0.394139	-0.762456	0.445788	0.130074	0.896508	-1.36827	0.171229	-0.460416	0.645218	-0.961866	0.336117
rs1801133	3990477	C1orf167;MTHFR	-0.649093	0.516278	0.0777194	0.938051	2.21778	0.02657	0.426516	0.669732	-0.729632	0.465615	-0.940493	0.346965	-2.93459	0.00333988	0.535604	0.592232	-3.18909	0.00142721	-1.79599	0.0724958
rs6011002	5960343	HELZ2	0.0466603	0.962784	0.0150331	0.988006	-1.75593	0.0791002	1.43941	0.150034	0.122571	0.902447	-0.51537	0.606295	0.431408	0.666171	1.36268	0.172982	-0.0700193	0.944178	0.245514	0.806058
rs495828	4490687	RP11-326L24.7;RALGDS;GBGT1	-0.709032	0.478305	0.311304	0.75557	0.459819	0.645646	1.46382	0.143244	-0.897369	0.369522	-0.75246	0.451774	-0.261735	0.793525	-0.643462	0.519925	-0.82186	0.411156	-0.130861	0.895885
rs7270101	6350086	ITPA	-1.00423	0.315269	1.20474	0.228306	-1.75325	0.0795592	0.958541	0.33779	0.746533	0.455345	-0.702328	0.482475	-0.605295	0.544983	-0.68629	0.49253	0.15748	0.874867	0.0917215	0.926919
rs12713147	1990440	FAM228B;PFN4	1.2759	0.201991	0.0602909	0.951924	0.499494	0.617431	0.150601	0.880291	0.154278	0.877391	1.28495	0.198809	-2.2942	0.0217788	2.39688	0.0165355	-1.37351	0.169593	-0.243091	0.807935
rs12303953	6350037	DNM1L;YARS2	-0.715624	0.474224	0.536711	0.591467	-0.31228	0.754828	-0.640008	0.522168	0.414998	0.678143	-0.117109	0.906774	-0.410533	0.681415	-1.04672	0.295229	0.0340026	0.972875	-1.55647	0.119597
rs1059440	940669	TRPT1	2.52969	0.0114165	-0.0499633	0.960152	0.287802	0.773498	-0.721483	0.470612	0.961176	0.336463	2.37598	0.0175025	0.365663	0.714616	2.21675	0.0266402	0.787868	0.430774	1.7213	0.0851973
rs10273214	2810376	-	0.673785	0.500448	-0.304517	0.760734	0.194099	0.846098	-0.654264	0.512942	0.546975	0.584396	0.270598	0.7867	-0.163568	0.870071	0.333809	0.738524	0.418747	0.675401	-0.221906	0.824387
rs4845992	110121	UBIAD1	1.02049	0.307494	-0.347347	0.72833	0.982021	0.326089	-1.51026	0.130976	0.436394	0.662551	0.589506	0.555522	-0.421913	0.673088	0.981959	0.32612	0.448294	0.653941	0.879828	0.378952
rs17818399	1740008	PIGF	0.129885	0.896657	1.08344	0.278613	-2.40296	0.016263	2.57721	0.00996025	2.43081	0.0150651	0.307572	0.758408	0.691742	0.4891	-1.30694	0.191234	1.25785	0.208445	0.235603	0.813741
rs1782127	2650100	LRRC8D	1.56282	0.118095	-0.621963	0.533966	-0.349068	0.727039	-0.354699	0.722815	-1.83567	0.0664066	-2.11381	0.0345311	-0.736115	0.461661	-0.729572	0.465652	-1.32337	0.185711	-0.821116	0.41158
rs1734907	1260730	EPHB4	1.5868	0.112559	-1.4271	0.153552	-0.367215	0.713459	0.19836	0.842764	-0.501417	0.616078	1.29461	0.195455	-0.823242	0.410371	0.636764	0.524279	-1.02586	0.304958	-0.626028	0.531297
rs2339844	7160037	USP13	-0.0596766	0.952413	0.539673	0.589422	-0.611391	0.540941	0.727324	0.467028	0.0305585	0.975622	0.0615586	0.950914	-0.207474	0.835639	-0.161574	0.871641	-0.972	0.331051	-0.538284	0.590381
rs4941524	2360184	GTF2F2	2.5576	0.0105397	-0.163365	0.870231	-0.012516	0.990014	0.144061	0.885452	1.77674	0.0756106	1.8015	0.0716242	-0.190123	0.849213	1.39792	0.162138	1.06784	0.285593	1.52522	0.127203
rs3794964	1030053	AC016629.8;MZF1	-0.454241	0.649656	-0.160872	0.872194	1.43259	0.151976	-0.498355	0.618234	0.469272	0.638875	-0.00704578	0.994378	1.50797	0.131563	2.38483	0.0170869	1.08828	0.276469	2.21498	0.0267613
rs2472299	3170239	CSK	1.04622	0.295458	0.595984	0.551186	0.831995	0.405412	0.835954	0.403181	1.41564	0.156882	1.60547	0.108391	-0.904876	0.365531	0.33889	0.734692	0.469789	0.638506	1.05367	0.292036
rs1560117	3850678	LRRC25	2.45099	0.0142466	0.210992	0.832893	0.809796	0.418058	-0.103975	0.917189	-0.0360435	0.971248	1.14323	0.252943	-2.0419	0.0411615	1.94588	0.0516693	-2.25818	0.0239345	0.390939	0.695842
rs1822378	3780487	GNAL;MPPE1	1.04803	0.294627	-1.24315	0.213814	0.691521	0.489238	0.205742	0.836993	0.349992	0.726345	0.609878	0.541943	-0.201008	0.840692	0.305483	0.759998	-0.785264	0.432299	-0.789664	0.429724
rs8972	2070470	C1orf21	0.65408	0.51306	1.54	0.12356	-1.19506	0.232065	1.17263	0.240945	1.09382	0.274032	0.814246	0.415504	-0.444685	0.656547	1.09104	0.275254	0.0737696	0.941194	1.64777	0.0994
rs2236014	4010097	FBXO5	0.676848	0.498502	-0.148415	0.882015	-1.58531	0.112895	0.284216	0.776245	0.27065	0.78666	0.089252	0.928882	-0.139278	0.88923	-1.48847	0.136628	1.362	0.173199	0.23125	0.817121
rs2150702	6860612	KIAA2026	0.212145	0.831994	-0.710225	0.477565	-0.778176	0.436465	0.549641	0.582566	-0.00295803	0.99764	-0.284157	0.77629	1.02014	0.307663	-1.36693	0.171649	0.839029	0.401453	-0.595965	0.551198
rs3790316	3890408	RRBP1	-1.05141	0.293069	-0.188523	0.850466	0.141622	0.887379	-0.674785	0.499812	-1.12315	0.261374	-0.625919	0.531368	-0.429989	0.667204	-0.669229	0.503349	-0.646766	0.517783	-1.28849	0.197574
rs2587881	3170446	NUDT21	-0.876793	0.380599	1.24124	0.214518	-0.135727	0.892037	1.31164	0.189641	0.510818	0.609479	-0.0254767	0.979675	-1.12575	0.260273	-0.112577	0.910366	-0.809722	0.4181	-0.522772	0.601133
rs9469220	6450692	PSMB9	-0.682396	0.494989	-0.405432	0.68516	1.55497	0.119953	-0.509818	0.610179	0.725083	0.468401	1.69399	0.0902678	0.730892	0.464845	-0.277573	0.78134	1.78274	0.074628	0.804867	0.420897
rs3129055	5220070	HLA-F	1.46432	0.143106	-1.00782	0.31354	2.02434	0.0429357	-0.310644	0.756071	-1.05785	0.290123	1.29963	0.193726	1.63669	0.101696	-0.0670421	0.946548	0.319134	0.749625	1.61468	0.10638
rs968451	6770768	SYNGR1	-0.71726	0.473214	0.867379	0.385734	-0.28567	0.775131	-0.320926	0.748267	-1.09339	0.274223	-1.95175	0.0509681	-2.36616	0.0179736	-0.821237	0.411511	-3.36215	0.000773375	-2.34612	0.0189698
rs12427095	4570131	SIRT4	0.178566	0.858278	1.60968	0.107467	-1.88455	0.0594904	1.56246	0.118179	0.00508059	0.995946	0.974705	0.329707	-0.754149	0.45076	0.103994	0.917174	-1.07686	0.281544	-0.176882	0.859601
rs1534150	6590132	IGFBP3	-0.964036	0.335028	0.641967	0.520895	1.05843	0.289859	1.38091	0.167307	1.51513	0.129739	0.313442	0.753945	1.89186	0.0585101	0.184083	0.853948	2.26263	0.0236585	1.19351	0.232669
rs7155279	4670441	FBLN5	0.925693	0.354606	-0.88977	0.373589	1.91989	0.054872	-0.403489	0.686589	-0.825237	0.409237	-1.12492	0.260621	-0.762315	0.445872	1.30937	0.190408	-1.24463	0.213266	-0.185409	0.852908
rs2774279	6280333	USF1	0.218636	0.826933	-0.309177	0.757187	0.8247	0.409542	-0.909237	0.363225	-0.292941	0.769567	-1.33046	0.183365	0.747333	0.454862	0.0242002	0.980693	0.945392	0.344459	1.31544	0.188363
rs2046494	5820601	CCND1;ORAOV1	-0.419694	0.674709	0.0472038	0.962351	0.14218	0.886938	1.44961	0.147166	-0.0759769	0.939437	0.474219	0.635344	1.37574	0.168901	-0.894743	0.370924	0.717039	0.47335	0.0945657	0.92466
rs7165012	6020398	IVD	0.0551969	0.955982	-0.0422949	0.966264	-0.571941	0.567362	0.575238	0.56513	0.225104	0.821898	-0.314057	0.753478	1.34851	0.177495	0.318623	0.750012	0.299568	0.764507	2.56353	0.0103614
rs3747572	3360167	PAM16;CORO7-PAM16;CORO7	-1.6	0.109598	1.09827	0.272085	-1.89586	0.0579785	2.4112	0.0159002	1.72349	0.0848008	-0.0634207	0.949431	0.745122	0.456198	0.399172	0.689767	1.68339	0.0922993	-0.567481	0.570388
rs1338516	1030367	-	6.5033	7.85777e-11	1.11486	0.264909	-1.45306	0.146208	1.47533	0.140123	7.49119	6.82501e-14	7.95791	1.74964e-15	4.32485	1.52634e-05	4.17766	2.94527e-05	4.73162	2.22734e-06	8.89081	6.06642e-19
rs1695213	6620132	RP11-849F2.5;KRBA2;RPL26	-0.887104	0.375023	0.393663	0.69383	-0.92572	0.354592	0.402128	0.68759	-0.617004	0.537232	-1.29456	0.195472	0.63393	0.526127	-0.433576	0.664596	0.451884	0.651352	-1.01098	0.312024
rs2120461	10008	RERE	0.69776	0.485328	0.610088	0.541804	-1.06063	0.288859	0.885054	0.376128	1.90337	0.0569925	0.988249	0.323031	0.779732	0.435548	-0.523046	0.600942	1.98014	0.0476883	0.942681	0.345844
rs2042300	5810471	MYO1F	2.33054	0.0197779	0.230198	0.817938	0.446961	0.654903	-0.190484	0.84893	1.07889	0.280638	2.29949	0.0214769	-0.562968	0.573457	-0.311577	0.755362	-0.244245	0.807041	1.97865	0.0478559
rs9374080	2190437	SMPD2	0.842546	0.399482	0.614878	0.538635	-0.994427	0.320015	0.437406	0.661817	-0.0682785	0.945564	0.286044	0.774845	-0.277464	0.781424	1.58286	0.113452	-0.505013	0.61355	-1.52798	0.126519
rs9512730	6370484	POLR1D	1.27514	0.20226	-0.911881	0.361831	1.09783	0.272279	-1.00531	0.31475	1.51517	0.12973	1.42007	0.155588	2.52015	0.0117304	1.91211	0.055862	1.63064	0.102966	2.89285	0.00381759
rs7616215	6550333	FYCO1;CXCR6	0.175561	0.860638	-0.0355177	0.971667	0.52975	0.596285	0.169285	0.865572	0.66815	0.504038	0.1688	0.865954	-0.0590151	0.95294	-0.556825	0.577647	0.500126	0.616987	-0.817311	0.413751
rs10865974	1300497	SPCS1	0.962705	0.335696	0.201156	0.840577	1.77258	0.076298	1.613	0.106745	-1.39026	0.164451	-0.471799	0.63707	-0.64136	0.521289	-0.772743	0.439675	-1.46806	0.142088	1.25303	0.210196
rs564834	940519	PTGDR2	-0.821989	0.411083	0.422347	0.672771	-0.0122138	0.990255	0.194969	0.845418	0.170362	0.864725	0.485891	0.627044	-0.247489	0.80453	-1.45153	0.146633	0.378677	0.704928	-0.246626	0.805198
rs11250231	7210040	WDR37	-0.63047	0.528387	0.517949	0.604494	-1.27669	0.201713	0.549935	0.582364	-0.836721	0.402749	-1.85534	0.0635478	-0.264389	0.79148	-1.50239	0.132998	-0.928951	0.352914	-1.02	0.307728
rs2621416	2650156	TAP2	3.21581	0.00130075	-1.35175	0.176456	-0.078117	0.937735	0.50009	0.617012	0.582121	0.560485	1.42316	0.154691	2.31225	0.0207638	2.51667	0.011847	1.6867	0.0916612	2.8876	0.00388198
rs4324873	7160082	KLHDC10	-0.736067	0.46169	-0.260147	0.79475	-0.771087	0.440655	0.863468	0.38788	3.05027	0.00228637	0.732859	0.463645	4.35364	1.33897e-05	-0.123333	0.901844	5.16739	2.3739e-07	2.92411	0.00345441
rs7071853	5560504	RP11-179H18.2	0.431127	0.666376	0.0539238	0.956996	1.01953	0.307953	-0.27944	0.779907	0.609331	0.542305	1.09822	0.272108	-0.0681829	0.94564	1.80813	0.0705867	-0.274279	0.78387	1.11271	0.265833
rs6540731	5870746	PPP2R5A	4.7655	1.88388e-06	-1.39259	0.163745	2.21753	0.0265869	-0.821593	0.411309	0.366151	0.714253	3.51536	0.000439166	0.475349	0.634538	2.92976	0.00339221	-0.992437	0.320984	3.10893	0.00187764
rs9807819	3610452	FBXO46	0.0386543	0.969166	-0.0207817	0.98342	0.611412	0.540927	-0.507657	0.611694	-0.704721	0.480984	-0.513955	0.607284	2.53212	0.0113375	-0.234407	0.814669	2.04044	0.0413066	0.489747	0.624313
rs17796110	2230059	NAA30	1.00094	0.316854	0.503825	0.614384	0.653024	0.513741	0.123106	0.902023	1.47514	0.140175	1.6703	0.0948599	-0.841697	0.399957	1.88626	0.0592598	-0.0522178	0.958355	0.590982	0.554532
rs8078723	5390608	GSDMB	0.383091	0.701652	-1.39712	0.162379	1.23555	0.216625	0.290918	0.771114	-0.128429	0.89781	-0.184798	0.853387	2.60405	0.00921291	1.03725	0.299621	1.27973	0.20064	1.36847	0.171166
rs9242	4860220	SRGAP2	1.29688	0.194671	0.836614	0.40281	-0.255454	0.798373	0.696423	0.486164	1.20847	0.226866	0.983937	0.325146	-0.611619	0.54079	0.248946	0.803402	0.579692	0.562122	2.63865	0.0083236
rs2037203	2940373	TACC1	0.0769653	0.938651	2.49653	0.0125415	-0.612265	0.540362	1.55083	0.120942	2.82745	0.00469197	2.01521	0.0438828	-0.872385	0.382998	1.01441	0.310389	1.31449	0.188683	0.729021	0.465989
rs17222691	510544	RAD51C	0.205954	0.836827	1.3534	0.175929	-0.357028	0.721071	0.986934	0.323675	3.04491	0.00232747	1.88988	0.0587738	1.12518	0.260514	2.87478	0.00404309	2.6057	0.00916873	1.96583	0.0493177
rs12893829	7650504	CTAGE5	1.18442	0.236245	-1.21469	0.224483	0.980965	0.32661	-0.834711	0.403881	0.410121	0.681717	0.19099	0.848534	2.29813	0.0215546	-1.18702	0.235218	0.990515	0.321922	0.464569	0.64224
rs3828546	520114	PET112	-1.74906	0.0802808	-2.11263	0.0346324	2.15572	0.0311059	-1.77031	0.0766752	-1.35549	0.175263	-2.28205	0.0224865	-0.155377	0.876524	-2.15942	0.0308175	-0.0674808	0.946199	-1.93526	0.052958
rs3445	2510161	B3GALT4	0.375461	0.707318	-2.51237	0.0119922	1.86662	0.0619543	-0.871383	0.383545	-1.22974	0.218794	-0.515056	0.606514	4.51654	6.28597e-06	-0.807904	0.419146	3.00766	0.00263266	2.17254	0.0298151
rs448254	6350039	SRGAP3	-1.02909	0.303437	2.24747	0.0246102	-1.00947	0.312748	1.23596	0.216474	2.04743	0.040616	0.817337	0.413736	0.874315	0.381947	0.469337	0.638829	2.37797	0.0174082	0.262837	0.792676
rs12175489	780600	HCP5	-1.17679	0.23928	-0.0273627	0.97817	-0.686828	0.492191	1.60196	0.109164	-2.06052	0.0393492	-1.54264	0.122919	0.0232527	0.981449	-0.574198	0.565834	-0.632331	0.527171	-1.06889	0.285119
rs2293579	6650575	MADD	-0.801596	0.422787	0.193961	0.846206	1.87769	0.0604239	-1.38411	0.166325	-0.705314	0.480615	-0.47681	0.633497	-1.27372	0.202764	-0.282028	0.777922	-0.590344	0.55496	-1.00398	0.31539
rs9303277	1500112	ORMDL3	-0.132895	0.894276	0.00242874	0.998062	-2.808	0.00498495	1.34337	0.179152	1.50566	0.132155	-0.10641	0.915257	2.55964	0.0104781	-0.996587	0.318965	2.58056	0.00986401	0.124349	0.901039
rs10283236	4890270	LY6E	-0.549683	0.582537	0.0638802	0.949066	0.427534	0.668991	0.367972	0.712894	0.0382235	0.96951	-0.549948	0.582355	0.605997	0.544517	0.7811	0.434744	0.839308	0.401296	-0.264555	0.791352
rs10415988	3850731	AC011530.4;DMWD	1.24952	0.211474	1.79714	0.0723137	-0.871852	0.383289	1.52441	0.127407	0.936182	0.349179	-0.317965	0.750512	-0.761829	0.446162	-0.660016	0.509243	0.503688	0.61448	-1.58387	0.113223
rs7712162	10050	PAPD4	0.17161	0.863744	1.61561	0.106179	-0.305359	0.760093	0.924883	0.355027	1.33806	0.180876	0.526514	0.598531	-0.693843	0.487781	0.460699	0.645014	0.98126	0.326464	0.976206	0.328962
rs7932813	2940050	CYB5R2	-1.17576	0.239693	-0.26498	0.791025	1.05735	0.290352	-1.55955	0.118866	-1.04945	0.293969	-1.36553	0.172087	-0.838253	0.401889	-0.141329	0.88761	-1.5764	0.114934	-0.336701	0.736342
rs9611852	3610072	A4GALT	-0.232485	0.816161	-1.58938	0.111975	5.36683	8.01318e-08	-2.23549	0.0253851	-0.00680708	0.994569	-0.521996	0.601673	0.116547	0.907219	0.111931	0.910878	-0.0410251	0.967276	1.19187	0.233314
rs3736112	1440020	MVD	1.08003	0.28013	0.846529	0.397258	-0.903298	0.366368	0.0327832	0.973847	-0.256058	0.797906	1.0474	0.294916	-0.0746547	0.940489	1.16359	0.244591	-1.40942	0.158711	-0.723734	0.469229
rs9896940	6900091	IKZF3	-0.28338	0.776886	0.10263	0.918256	-1.17836	0.238652	0.265238	0.790826	1.51958	0.128617	-0.175565	0.860636	-0.218871	0.82675	0.259498	0.795251	0.49507	0.62055	-0.530683	0.595639
rs7959068	60554	PLXNC1	2.55046	0.010758	1.41492	0.157093	-0.746869	0.455143	-0.506653	0.612398	1.84378	0.065215	2.68664	0.00721741	-0.0187599	0.985033	1.19094	0.233678	1.015	0.310108	1.5006	0.133459
rs2001274	6840209	LGALS4	-0.0510651	0.959274	2.0045	0.0450162	0.0308889	0.975358	0.498645	0.61803	1.0858	0.277568	0.950882	0.341664	-1.37025	0.170608	0.456186	0.648256	-0.137911	0.89031	0.0900518	0.928246
rs12988934	7200768	ITGA4	1.22482	0.220645	0.310934	0.755851	-1.35084	0.176748	1.30916	0.19048	1.06478	0.286978	1.24614	0.212711	-0.83342	0.404608	0.449846	0.652822	-0.36743	0.713299	0.143523	0.885878
rs2257205	6420646	-	0.233528	0.815352	-1.66492	0.0959281	0.395305	0.692618	0.190646	0.848803	-0.731256	0.464623	-0.675358	0.499448	0.814443	0.415391	0.540413	0.588912	-0.388947	0.697316	-0.489851	0.624239
rs930847	510551	RP11-505E24.2;LRRK1	0.358876	0.719688	1.07656	0.281676	-1.14421	0.252535	0.968245	0.332922	1.87091	0.0613572	0.527813	0.597629	0.448298	0.653938	0.346957	0.728623	1.01617	0.309549	0.780432	0.435136
rs490358	2600431	RP11-872D17.8;SLC43A3	1.55886	0.11903	1.21633	0.223858	0.0573362	0.954277	0.416324	0.677173	1.77449	0.0759813	2.28555	0.0222806	-1.54869	0.121457	0.881477	0.378059	-0.602477	0.546857	0.36389	0.71594
rs1494508	6580349	LEMD3	1.44865	0.147435	4.04128	5.31597e-05	-2.04401	0.040953	1.35447	0.175588	3.00702	0.00263824	3.01016	0.00261111	-4.99307	5.94264e-07	1.2345	0.217018	-2.75861	0.0058048	-0.61006	0.541822
rs451331	4200196	TNFAIP8	-0.350911	0.725655	-0.165473	0.868571	1.03413	0.301075	0.530075	0.59606	-0.6092	0.542392	-0.018128	0.985537	-0.380471	0.703596	0.837805	0.40214	-1.62018	0.105194	0.289733	0.772021
rs17050782	5870594	-	-0.401416	0.688114	0.386998	0.698757	1.30588	0.191592	0.558269	0.57666	0.253822	0.799633	0.02074	0.983453	-0.233314	0.815518	0.358059	0.720299	0.132663	0.89446	0.90351	0.366255
rs6060373	4480519	EDEM2	-0.255864	0.798056	0.928488	0.353154	-1.01666	0.309315	0.166564	0.867713	0.0326872	0.973924	0.135878	0.891918	-0.271533	0.785981	-0.86586	0.386567	0.608269	0.543009	0.583958	0.559249
rs916977	6130674	HERC2	-0.0319829	0.974486	-0.994168	0.320141	-1.08831	0.276458	-0.809263	0.418364	-0.738951	0.459937	-0.730601	0.465023	1.0384	0.299083	0.889201	0.373895	-0.163767	0.869914	0.801506	0.422839
rs743491	6380010	LRRC3DN	0.698688	0.484747	0.335723	0.73708	-1.50944	0.131187	1.0688	0.285159	1.62293	0.104604	1.93887	0.052517	0.924629	0.355159	0.485402	0.627391	1.75052	0.0800289	1.09541	0.273336
rs2072990	2230377	TELO2;IFT140	-0.0228874	0.98174	1.49654	0.134513	-0.541561	0.588121	2.2822	0.0224777	-0.0319959	0.974475	-0.338751	0.734797	-1.86714	0.0618818	-0.0154383	0.987682	-0.877141	0.38041	-0.796867	0.425528
rs7582598	4070289	AC010976.2;IWS1	1.24651	0.212576	0.45934	0.64599	1.3223	0.186067	0.836491	0.402879	1.06402	0.287318	1.36527	0.172168	0.560706	0.574998	0.77567	0.437944	0.93958	0.347433	2.43511	0.0148871
rs198846	3930377	TRIM38	1.03674	0.299858	0.509557	0.610362	0.0365921	0.97081	0.0415974	0.96682	2.57905	0.00990732	1.02718	0.304336	-1.35938	0.174025	0.560644	0.57504	1.06835	0.285363	1.02494	0.305392
rs4785763	4210066	DEF8	0.396012	0.692096	-0.11923	0.905093	-0.639641	0.522406	0.280158	0.779356	1.51198	0.13054	0.687321	0.491881	2.00486	0.0449785	0.208124	0.835132	2.37229	0.0176781	1.09795	0.272226
rs4765873	3440441	CACNA1C;CACNA1C-IT1	0.436058	0.662794	0.170748	0.864422	0.0590914	0.952879	0.776828	0.43726	0.25892	0.795697	0.162819	0.870661	0.717054	0.473341	0.126744	0.899143	0.82922	0.40698	1.17093	0.241628
rs7119933	540368	GAB2	0.0955969	0.923841	-0.370803	0.710784	0.616199	0.537763	0.780223	0.435259	-1.97083	0.0487428	-0.311426	0.755477	1.19316	0.232805	-0.437186	0.661976	-0.272046	0.785587	-1.00586	0.314481
rs7759971	5860253	AHI1	0.570763	0.568161	4.97073	6.67027e-07	-4.51441	6.34946e-06	5.40639	6.43094e-08	5.29776	1.1723e-07	2.51724	0.0118278	-2.52504	0.0115684	0.963574	0.335259	0.0268534	0.978577	0.193178	0.846819
rs236301	4070053	BCAR3	1.70075	0.0889902	0.180958	0.8564	0.0662419	0.947185	0.877632	0.380143	0.702759	0.482206	1.59531	0.110644	-0.58278	0.560041	1.04635	0.295401	-0.232018	0.816524	1.49304	0.135427
rs10877840	2490315	RP11-476D10.1	2.17825	0.0293871	2.23087	0.0256895	-1.4811	0.13858	1.54333	0.122751	2.46613	0.0136581	1.60411	0.108689	-1.75159	0.0798451	2.94667	0.00321212	-0.209449	0.834098	2.68789	0.00719054
rs163034	580187	PDE8B;WDR41	-1.431	0.152431	0.228486	0.819269	0.740509	0.458991	-0.408875	0.682631	-0.112123	0.910726	-1.03605	0.300181	0.602993	0.546513	-1.00873	0.313104	-0.296377	0.766942	-0.512518	0.608288
rs11677416	6420731	SLC20A1	-0.76283	0.445565	-0.795478	0.426335	0.0456786	0.963566	-0.896332	0.370076	-1.29932	0.193833	-0.432998	0.665016	1.08346	0.278604	0.810436	0.41769	-0.0676274	0.946082	0.173865	0.861972
rs1805726	1070286	M6PR	0.0877988	0.930037	-0.0905677	0.927836	0.109123	0.913105	0.442795	0.657914	0.262436	0.792985	-1.1632	0.24475	1.15237	0.249167	-2.26261	0.0236597	1.14563	0.251949	1.63889	0.101236
rs10882889	6110332	ARHGAP19	2.70073	0.00691875	-1.91196	0.0558811	0.364032	0.715834	-1.02738	0.304241	1.27596	0.20197	2.38901	0.0168941	3.04114	0.00235683	1.19569	0.231818	2.58993	0.00959955	2.15034	0.0315283
rs9868648	6250154	LZTFL1	0.464492	0.642295	-0.336286	0.736655	2.40382	0.0162249	-0.221666	0.824574	-0.253102	0.800189	0.837351	0.402395	0.530075	0.59606	-0.0664531	0.947017	0.72589	0.467906	-0.496966	0.619213
rs2555568	2760121	ADHFE1;C8orf46	0.770986	0.440715	2.11293	0.0346071	-1.41443	0.157234	0.862352	0.388494	3.27194	0.00106812	1.03797	0.299284	-0.612098	0.540473	1.65103	0.0987318	0.403246	0.686767	0.915697	0.359826
rs2753325	7050414	CACNA1H	0.24528	0.806239	-0.761134	0.446577	1.41976	0.155676	-0.623087	0.533227	-0.0629818	0.949781	-0.0346911	0.972326	-0.412159	0.680223	0.352082	0.724777	0.143651	0.885776	0.259502	0.795248
rs3803064	3450180	RP1-71H24.1;OAS1	-0.0939308	0.925164	-1.53923	0.123748	1.14382	0.252699	-1.06321	0.287687	-1.2658	0.205583	-0.956798	0.338669	1.64123	0.100749	-1.5326	0.125374	0.729837	0.46549	1.56604	0.117339
rs478093	240086	PHGDH	-2.88275	0.00394225	1.58855	0.112163	-1.19137	0.233507	2.20093	0.0277409	0.0600813	0.952091	-1.37939	0.167775	-0.822914	0.410557	-1.61171	0.107026	-0.585255	0.558376	-1.34941	0.177204
rs1329126	6660768	RP4-781K5.2;IRF2BP2	-0.459706	0.645727	-0.268618	0.788224	0.526181	0.598763	-0.677683	0.497973	-1.6899	0.0910467	-1.63977	0.101054	-1.29451	0.195491	-0.0418673	0.966605	-2.84199	0.00448327	-2.05015	0.0403496
rs11220462	1500129	DCPS	0.307897	0.758161	1.87756	0.0604413	-0.184801	0.853385	0.149731	0.880977	1.0186	0.308392	0.394836	0.692964	-0.721078	0.470861	-0.633796	0.526214	1.00325	0.315739	1.71549	0.0862554
rs1735169	20707	COMMD5	0.36672	0.713828	-2.22459	0.0261091	1.51972	0.128582	-0.613713	0.539405	-1.9413	0.0522225	-2.2805	0.022578	1.73682	0.0824197	-1.87566	0.0607025	0.931076	0.351814	0.18705	0.851621
rs11022157	610440	CD81	-0.356016	0.721829	1.28348	0.199324	-0.232428	0.816206	1.06808	0.285484	0.444873	0.656411	0.640429	0.521893	0.0401525	0.967972	0.708471	0.478653	0.503074	0.614913	1.09045	0.275515
rs26868	6200243	PGP;RP11-304L19.8	2.14637	0.0318435	-0.178498	0.858332	1.20535	0.228068	0.488436	0.625241	-0.898598	0.368867	-0.902681	0.366695	1.35259	0.176186	-0.864017	0.387578	1.53781	0.124096	-0.110708	0.911848
rs10484434	3890349	HIST1H4C	-0.557556	0.577148	-1.07033	0.284471	1.82308	0.0682911	-1.79277	0.0730102	-0.167538	0.866947	-2.16581	0.0303255	0.951907	0.341144	-1.53065	0.125856	0.943581	0.345384	-0.227504	0.820032
rs10797081	4060095	RP11-528G1.2;CD84	-0.44166	0.658735	0.409412	0.682238	0.319962	0.748997	1.63189	0.102703	1.33291	0.18256	-0.244263	0.807027	0.846406	0.397327	0.355123	0.722498	1.93557	0.0529204	3.06571	0.00217153
rs10871454	5220347	BCKDK	-0.951833	0.341182	0.533018	0.594021	-0.539855	0.589297	1.17522	0.239906	0.426429	0.669795	-0.702216	0.482545	-0.552549	0.580573	-0.727204	0.467101	-0.668532	0.503794	-0.911387	0.362092
rs8044057	4200162	RP11-70O5.1;CIRH1A	0.972106	0.330998	1.21688	0.223649	1.04844	0.294436	1.59529	0.110647	1.53108	0.12575	1.31182	0.189582	-0.981751	0.326222	2.6305	0.00852591	0.69177	0.489082	2.34706	0.0189222
rs2031532	780500	CAB39L	0.874361	0.381922	0.109153	0.913081	0.592123	0.553769	-0.0482883	0.961486	0.061531	0.950936	0.195951	0.844648	-0.138246	0.890046	-0.323621	0.746225	-0.906986	0.364414	0.409214	0.682382
rs4402960	2940349	SENP2	0.470838	0.637757	-0.526762	0.598359	0.417187	0.676542	0.0926292	0.926198	-0.507609	0.611728	-0.501585	0.61596	0.242268	0.808573	0.729299	0.465819	-0.562758	0.5736	1.76083	0.0782669
rs42431	360376	GIN1	2.35856	0.018346	0.69694	0.48584	-0.890116	0.373404	0.369678	0.711623	1.20082	0.229822	2.35381	0.0185823	-0.430455	0.666864	1.15124	0.249632	0.482597	0.629382	2.1668	0.03025
rs4659411	6280240	SH3BGRL3	1.13842	0.254946	0.776185	0.43764	0.248866	0.803464	1.32513	0.185129	0.612169	0.540426	1.38655	0.165578	-0.707577	0.479208	-0.194322	0.845924	-0.0423374	0.96623	0.431169	0.666345
rs6775899	1300408	HCLS1	-0.0687012	0.945227	0.105078	0.916314	-0.512764	0.608116	0.111946	0.910866	0.464776	0.642092	0.0408766	0.967394	1.23484	0.21689	-0.151338	0.879709	1.26369	0.20634	1.08944	0.275958
rs17035378	6200768	PPP3R1	-0.360751	0.718285	-1.2869	0.19813	0.115337	0.908178	-1.48347	0.137951	-1.72991	0.083647	-0.76177	0.446197	0.876445	0.380788	-0.261973	0.793342	-0.8572	0.391334	-0.703793	0.481561
rs13244634	1410075	WIPI2	0.539736	0.589379	-0.676606	0.498656	0.189901	0.849387	1.18938	0.234288	0.799845	0.423801	0.406702	0.684227	3.49849	0.000467908	0.722611	0.469919	2.77241	0.00556432	3.45444	0.000551427
rs7239133	4210019	RIOK3	0.248384	0.803837	0.687999	0.491453	-0.539819	0.589322	1.21839	0.223075	1.38863	0.164946	0.402686	0.687179	0.788021	0.430685	0.883404	0.377018	0.740878	0.458767	2.06001	0.039398
rs7327064	7400279	CCNA1	-0.212611	0.831631	-1.14927	0.250444	-0.492097	0.622651	-1.31843	0.187359	-1.23221	0.217871	-0.349812	0.726479	0.0520233	0.95851	-0.091483	0.927109	-0.687086	0.492029	0.135398	0.892297
rs2839619	2100537	PKNOX1	-1.29227	0.196262	2.69606	0.00701649	-1.4323	0.152059	2.90749	0.00364337	2.1821	0.0291022	0.628924	0.529399	-0.296456	0.766882	0.76482	0.444379	0.410226	0.68164	1.12571	0.260286
rs3846662	5360296	-	0.579003	0.562587	0.292997	0.769525	-0.145759	0.884112	-0.0363733	0.970985	1.47514	0.140174	1.01813	0.308615	0.189208	0.849929	0.119583	0.904814	-0.158369	0.874166	1.30192	0.192943
rs1150754	4150482	DOM3Z	1.58551	0.11285	-0.923824	0.355578	0.389141	0.697172	-0.947176	0.343549	-0.676793	0.498537	1.10899	0.267432	-1.01697	0.309168	-0.967966	0.333061	-2.08845	0.0367571	-1.64831	0.0992883
rs10170424	3930333	AC007246.3	-0.992358	0.321023	-0.399101	0.689819	0.0406107	0.967606	-0.121816	0.903045	-0.0812186	0.935268	-0.946992	0.343643	0.834043	0.404256	0.0528472	0.957854	0.607924	0.543238	-0.309087	0.757256
rs1108842	6040053	STAB1	0.242693	0.808243	-0.999567	0.31752	0.277459	0.781427	0.00491822	0.996076	0.156822	0.875385	-0.252064	0.800992	1.2004	0.229984	1.33738	0.181099	0.77943	0.435726	1.56412	0.117789
rs8076131	1500112	ORMDL3	-2.35634	0.0184561	1.0112	0.311918	-0.499038	0.617753	1.1974	0.23115	0.868758	0.38498	-1.47423	0.140419	0.470056	0.638315	-0.489687	0.624355	1.56577	0.117401	-0.308655	0.757584
rs9937837	870711	ZNF646;PRSS53;VKORC1	-1.67605	0.0937283	1.06021	0.289048	0.484797	0.62782	1.58888	0.112088	-0.728206	0.466487	-1.25613	0.209068	0.809744	0.418087	-1.42611	0.153836	0.3228	0.746846	-0.495083	0.620542
rs949285	7650286	EXPH5	1.42065	0.155417	0.735572	0.461991	0.205955	0.836826	-0.255266	0.798518	-0.457255	0.647488	-0.62506	0.531932	-1.2081	0.227007	-1.63736	0.101554	-0.852014	0.394206	-1.79087	0.0733148
rs12925729	1090239	SF3B3	1.19945	0.230352	0.175353	0.860802	1.97343	0.0484465	-1.48589	0.137308	0.823059	0.410475	1.76112	0.0782182	0.207918	0.835293	0.68884	0.490924	0.792614	0.428003	1.81941	0.0688486
rs12365972	3060458	FAM111A	-0.518096	0.604392	1.54834	0.121541	-0.686302	0.492523	1.68992	0.0910439	0.690549	0.489849	0.266904	0.789543	-1.31892	0.187195	0.214093	0.830475	-0.907782	0.363994	-0.307868	0.758183
rs7616140	1500762	C3orf37	-0.609191	0.542398	-0.403129	0.686853	1.13351	0.257	1.01096	0.312036	0.617862	0.536666	-0.429256	0.667737	0.587492	0.556873	-0.917879	0.358682	1.52768	0.126591	0.79288	0.427848
rs9394159	6420070	PHF1	0.68476	0.493496	-0.00564342	0.995497	0.885115	0.376095	0.192878	0.847054	-0.956736	0.338701	-0.532157	0.594617	-1.37504	0.169119	-3.35536	0.000792626	-1.67257	0.0944123	0.114061	0.90919
rs9892909	6130747	PRPSAP1	0.258619	0.795929	-0.492672	0.622245	1.0503	0.293578	-0.749868	0.453334	0.226911	0.820493	-0.306584	0.75916	-0.478097	0.632581	-0.5046	0.61384	0.19426	0.845972	1.01306	0.311034
rs790116	2370128	DIRC2	1.28665	0.198218	-0.00540295	0.995689	-0.0861184	0.931372	-0.453006	0.650544	0.358491	0.719976	0.44945	0.653107	-0.0426255	0.966	-0.280313	0.779237	0.880183	0.37876	0.0795725	0.936577
rs6777787	6770168	-	-0.810591	0.417601	-1.21541	0.224209	0.248913	0.803428	-1.00796	0.313476	-2.39466	0.0166358	-1.83413	0.066635	0.415693	0.677634	-0.501952	0.615701	-1.30386	0.192283	-1.15486	0.248146
rs2268079	3400577	RALY;EIF2S2	1.52532	0.127179	1.58914	0.112028	-0.421932	0.673075	1.09278	0.27449	1.45177	0.146565	2.0632	0.0390933	0.851593	0.39444	2.05036	0.0403293	1.60621	0.108229	1.76283	0.0779299
rs6670984	4590377	ANKRD35	0.199353	0.841987	0.0287846	0.977036	-0.425528	0.670452	0.0443373	0.964636	-0.44648	0.65525	-0.630688	0.528244	0.0187704	0.985024	2.03039	0.0423167	-0.924119	0.355424	1.17866	0.238532
rs2162500	430215	-	0.991121	0.321626	0.707828	0.479052	0.438855	0.660767	1.15609	0.247643	1.36639	0.171816	1.04146	0.297664	0.460621	0.64507	0.592114	0.553774	1.15436	0.248354	1.57235	0.115868
rs4410870	6960014	MTMR9	-0.133487	0.893808	1.18433	0.236284	0.328205	0.742756	-0.217111	0.828122	1.44365	0.148839	1.72614	0.0843229	0.660443	0.50897	1.86362	0.0623749	1.91207	0.0558672	0.852338	0.394027
rs2251219	1300497	SPCS1	0.990339	0.322009	-0.0535233	0.957315	1.98844	0.0467626	1.51269	0.130358	-1.62604	0.10394	-0.715591	0.474244	-0.547288	0.584181	-1.14161	0.253616	-1.44423	0.148675	1.23956	0.21514
rs6518204	2750750	UBE2G2	0.444707	0.656532	0.5475	0.584035	1.04891	0.294221	1.76576	0.0774358	0.551908	0.581011	-0.0559471	0.955384	0.39887	0.689989	-0.985328	0.324463	0.447179	0.654746	1.12372	0.261133
rs167769	1110494	TMEM194A	-0.482964	0.629121	0.241369	0.809269	0.777436	0.436902	0.301696	0.762884	0.756442	0.449385	0.116373	0.907357	0.0701586	0.944067	-0.201175	0.840561	0.110915	0.911684	0.520751	0.60254
rs11226008	4480445	PDGFD	0.0867749	0.93085	0.655291	0.512281	-1.06071	0.288821	0.550485	0.581987	1.26633	0.205396	-0.292638	0.769799	-0.449598	0.653	-0.0199689	0.984068	0.403583	0.686519	0.351253	0.725399
rs8012	6660201	GCDH;SYCE2	0.162528	0.87089	-0.396771	0.691536	1.30997	0.190208	0.312418	0.754723	-0.135177	0.892472	-0.271577	0.785947	1.95288	0.0508333	1.05379	0.29198	0.233609	0.815289	0.859114	0.390278
rs376645	6290292	POMT2	1.47162	0.141124	-0.262234	0.793141	-0.413283	0.679399	0.272382	0.785328	1.78172	0.0747953	0.626441	0.531026	1.06576	0.286534	0.0710784	0.943335	1.91365	0.0556647	2.66009	0.00781208
rs2734583	1440603	-	2.03279	0.0420739	2.32508	0.0200676	-3.82259	0.000132059	2.57441	0.010041	3.28574	0.00101714	2.5133	0.0119606	-1.07805	0.281011	3.28079	0.00103515	-0.21711	0.828123	1.98973	0.0466205
rs17724968	5690709	PHLDB3	-0.358493	0.719975	0.415611	0.677694	-0.91069	0.362459	0.21672	0.828427	0.887667	0.37472	-0.0587664	0.953138	0.712222	0.476327	1.05878	0.289699	0.886209	0.375505	0.0116771	0.990683
rs3811686	270338	TRAT1	0.727588	0.466866	1.18865	0.234579	-1.55356	0.120289	-0.728274	0.466446	2.30587	0.0211178	1.67697	0.0935474	0.548413	0.583409	0.945917	0.344191	1.33361	0.182332	1.14725	0.251278
rs10096350	3390692	FAM83A	0.886296	0.375458	-0.83443	0.404039	4.50374	6.67693e-06	-1.67189	0.0945453	0.122075	0.90284	0.184649	0.853504	0.255318	0.798477	1.72856	0.0838885	0.731707	0.464347	0.906521	0.36466
rs10895547	4480445	PDGFD	-0.664849	0.506147	-1.01138	0.311837	-0.204322	0.838101	0.0700723	0.944136	0.171387	0.86392	-0.630244	0.528535	1.8813	0.0599314	-0.822891	0.41057	1.70127	0.0888926	0.191243	0.848336
rs7084324	5050112	MCMBP	2.832	0.00462579	0.852103	0.394157	-2.13131	0.0330636	1.9598	0.0500193	2.52198	0.0116696	1.23935	0.215215	0.266631	0.789754	2.14599	0.031874	1.64109	0.10078	3.57431	0.000351151
rs873651	4210669	BACH1	-1.23073	0.218425	-5.11969	3.06034e-07	3.15042	0.00163039	-3.40214	0.000668599	-5.07793	3.8157e-07	-3.90028	9.60796e-05	2.49569	0.0125712	-2.34892	0.0188277	-0.697203	0.485676	-1.81098	0.0701435
rs10187424	6580041	GNLY	0.143212	0.886123	1.17524	0.239898	-1.85669	0.0633557	1.35734	0.174673	1.05744	0.29031	0.121781	0.903073	0.843609	0.398888	0.224101	0.822679	1.33885	0.180621	1.50601	0.132064
rs756199	3870112	TSEN15	0.681657	0.495456	2.28244	0.0224635	-0.589891	0.555264	1.62823	0.103475	1.97821	0.0479049	1.29861	0.194079	-0.407852	0.683383	0.642833	0.520332	0.657055	0.511145	0.55044	0.582018
rs1678618	6510274	CDH23	-0.304771	0.760541	-0.800256	0.423563	-0.333677	0.738623	-0.155573	0.876369	-1.05212	0.292744	-1.01402	0.310572	1.20403	0.228577	0.742457	0.457811	-0.224954	0.822015	0.933809	0.350402
rs9630182	5090309	FAR1	-0.228698	0.819104	-0.0835662	0.933401	-0.718478	0.472463	0.550564	0.581933	0.0886518	0.929359	0.384519	0.700594	-0.209602	0.833978	0.823946	0.40997	0.265014	0.790999	-0.20026	0.841277
rs929209	2690189	KIAA0664L3	-2.27243	0.0230605	-0.554371	0.579325	-0.149825	0.880903	1.01864	0.308376	-0.762825	0.445568	-2.08696	0.0368916	5.07601	3.85448e-07	-1.05289	0.292389	1.81611	0.0693528	1.62058	0.105108
rs17300741	520750	PRDX5	-0.89877	0.368775	-0.735338	0.462134	-0.598739	0.549347	-0.186919	0.851724	0.236878	0.812751	1.332	0.18286	2.06446	0.0389745	0.829176	0.407005	1.72293	0.0849016	0.331723	0.740098
rs6073643	6620259	KCNS1	-1.51841	0.12891	-0.538122	0.590493	1.35059	0.176825	0.875816	0.38113	-0.461959	0.644111	-1.32276	0.185915	0.126917	0.899006	-1.28381	0.19921	0.448075	0.654099	-0.593713	0.552704
rs968567	380224	FADS2	0.237116	0.812567	0.600124	0.548424	-1.56152	0.118401	1.75423	0.0793919	0.876498	0.38076	-0.0483311	0.961452	-1.49084	0.136005	1.84625	0.0648552	-0.755651	0.449859	0.620096	0.535195
rs4452470	730762	TLR3	-0.236313	0.813189	-0.385568	0.699817	-1.22075	0.222182	-0.668311	0.503935	1.27968	0.200656	-0.328966	0.742181	0.22429	0.822531	-0.0393228	0.968633	0.960687	0.336709	0.647833	0.517093
rs12057769	2000128	C4BPA	6.72152	1.79839e-11	-1.86723	0.0618701	1.34911	0.177302	-0.446905	0.654943	3.89915	9.65312e-05	6.00427	1.92195e-09	3.69255	0.000222013	4.30679	1.65641e-05	3.91707	8.9632e-05	7.5071	6.04504e-14
rs3785891	6980475	EFTUD2	-0.583115	0.559816	1.4589	0.144593	-0.918979	0.358106	0.838031	0.402013	1.57143	0.116084	0.125593	0.900054	-0.69815	0.485084	0.273175	0.784719	0.955795	0.339176	0.911279	0.362148
rs4975144	240594	ANXA3	-0.387497	0.698389	-0.405071	0.685425	-0.572516	0.566973	0.283643	0.776684	-0.219152	0.826532	0.0468575	0.962627	1.2649	0.205906	0.0660627	0.947328	0.554664	0.579125	1.16962	0.242156
rs16874672	6620026	CD83	0.82438	0.409724	-0.252862	0.800375	0.00679062	0.994582	1.09575	0.27319	0.662463	0.507674	0.619438	0.535628	1.34014	0.180201	-0.958183	0.33797	1.32664	0.184627	1.00884	0.313053
rs7850258	4920451	-	0.399443	0.689567	0.457866	0.647049	-1.57643	0.114926	1.97186	0.0486261	0.803532	0.421667	1.02282	0.306395	0.66726	0.504606	1.80991	0.0703103	-0.407512	0.683632	-0.53732	0.591046
rs754784	1440543	TRIM23	0.558165	0.576732	-0.167405	0.867051	0.863249	0.388	-0.145079	0.884649	0.633704	0.526274	0.319098	0.749652	0.0333225	0.973417	0.532967	0.594057	0.219224	0.826476	1.25059	0.211084
rs10099615	5870164	TG;SLA	-0.162811	0.870667	-0.878529	0.379657	1.11031	0.266866	-0.87698	0.380498	0.0619603	0.950594	0.823661	0.410132	1.6164	0.106008	1.30738	0.191082	0.879665	0.379041	0.591745	0.554021
rs11107184	2480528	SOCS2-AS1	0.304309	0.760893	0.961247	0.336428	0.106694	0.915032	1.40512	0.159987	0.833316	0.404667	1.18607	0.235595	-0.962099	0.336	1.05628	0.290842	-0.708806	0.478445	-0.0240173	0.980839
rs27855	3440204	FBN2	0.432884	0.665099	0.65297	0.513775	-0.321052	0.748171	1.26106	0.207287	1.46596	0.142661	1.18543	0.235846	0.309192	0.757176	0.839891	0.40097	1.20287	0.229028	1.22291	0.221364
rs3745177	6220603	ZNF816-ZNF321P;ZNF816	-0.876435	0.380794	0.0404411	0.967741	0.0693532	0.944708	2.26341	0.0236105	1.3016	0.193054	-0.665468	0.505751	0.218507	0.827034	-0.909691	0.362985	0.821751	0.411219	-0.0995691	0.920686
rs485878	1050424	HYLS1;PUS3	0.811845	0.416881	-0.12122	0.903517	0.0545507	0.956496	0.5167	0.605365	0.579396	0.562322	-0.0701578	0.944068	0.210208	0.833506	0.939422	0.347514	0.525746	0.599064	0.980104	0.327035
rs389884	5560541	SKIV2L	-0.0327439	0.973879	0.262516	0.792923	0.0722676	0.942389	0.379629	0.704221	1.05892	0.289636	-0.544665	0.585984	1.71237	0.0868276	-0.310469	0.756204	2.31524	0.0205997	1.87295	0.0610754
rs6438503	2000646	B4GALT4	1.63852	0.101314	1.48323	0.138013	-1.16938	0.24225	0.65511	0.512397	2.12409	0.0336622	1.44657	0.148018	0.0751421	0.940102	1.34211	0.179559	1.28583	0.198501	1.08774	0.276712
rs2650951	2370128	DIRC2	1.82308	0.0682905	-1.38671	0.165531	0.183857	0.854125	0.198775	0.842439	0.530864	0.595513	1.81237	0.0699294	0.129132	0.897253	-0.332987	0.739144	-0.117161	0.906732	0.78047	0.435114
rs12946454	3890670	DCAKD	0.255227	0.798548	0.929198	0.352787	-1.07436	0.282661	0.599178	0.549054	0.262161	0.793197	0.200862	0.840807	1.55758	0.119333	1.76918	0.0768633	0.726078	0.467791	-0.300664	0.76367
rs11778556	4490142	RP11-299M14.2;NRBP2	-1.11719	0.263914	1.35741	0.174651	0.623918	0.532681	1.73653	0.0824697	1.01105	0.311991	-0.252911	0.800337	-0.739637	0.45952	0.386595	0.699056	1.05806	0.29003	0.5349	0.592719
rs2384207	4900753	RP11-545P7.4;C12orf52	-0.93984	0.3473	-1.32351	0.185665	0.685934	0.492755	-1.43363	0.151679	-2.52017	0.0117298	-2.411	0.0159088	-0.195306	0.845153	-1.88179	0.0598651	-1.12221	0.261772	-2.92037	0.00349621
rs896795	1340431	RP11-111A22.1;C15orf57	0.1069	0.914868	0.210632	0.833174	-0.289407	0.77227	0.776187	0.437638	1.06675	0.286084	-0.0636834	0.949222	2.054	0.0399755	0.731151	0.464687	3.96344	7.38783e-05	2.48668	0.012894
rs1633462	3610743	SF1	-0.893504	0.371587	-2.43129	0.0150453	0.760458	0.446981	-0.223296	0.823305	0.484818	0.627805	-1.2286	0.219223	8.2411	1.70627e-16	-0.644072	0.519528	5.15712	2.50774e-07	3.8916	9.95847e-05
rs678812	3290110	CTB-61M7.1;KIR3DL1;KIR2DL4;KIR2DL3;KIR2DL1	3.43966	0.000582454	0.630221	0.52855	-1.72233	0.0850101	0.970599	0.331748	3.36503	0.000765357	3.23213	0.00122873	-0.0304176	0.975734	3.37597	0.000735564	1.50553	0.132187	2.70084	0.00691649
rs6545814	620072	DNAJC27	0.315135	0.752659	-1.27692	0.20163	1.52592	0.12703	-1.44738	0.147791	-1.06426	0.28721	0.0844211	0.932722	0.814031	0.415627	-1.41795	0.156204	-0.10362	0.917471	0.0146078	0.988345
rs545218	3290475	NFYC	0.602355	0.546938	2.56752	0.0102427	-0.706752	0.479721	1.9746	0.0483134	2.85126	0.00435464	2.43646	0.0148318	0.421089	0.67369	0.0197598	0.984235	2.10169	0.0355802	2.36938	0.0178179
rs11046309	5360025	ST8SIA1	-1.86695	0.0619088	-0.468894	0.639145	0.791135	0.428865	-0.0227672	0.981836	-0.205348	0.837301	-1.17359	0.240558	0.437248	0.661932	0.0187476	0.985042	0.0117487	0.990626	-0.295413	0.767678
rs484809	4070025	POPDC2	0.518371	0.6042	-2.11278	0.03462	2.36927	0.0178232	-2.10201	0.0355524	-2.95544	0.00312225	-1.39019	0.16447	0.454622	0.649381	-1.58783	0.112324	-0.797221	0.425323	-1.71643	0.0860829
rs1999903	1260576	C1orf198	0.842861	0.399306	-3.48809	0.000486484	2.33351	0.0196216	-2.25126	0.024369	-1.52571	0.127083	-0.342764	0.731776	2.84017	0.00450894	-0.172134	0.863332	0.446922	0.654931	1.81325	0.0697935
rs1669338	3780554	-	0.319914	0.749034	1.29946	0.193788	-0.526339	0.598652	0.336345	0.736611	2.24011	0.0250836	1.93923	0.0524731	0.213175	0.831191	0.375636	0.707188	1.31055	0.19001	1.42579	0.153929
rs2239725	4070215	RGS12	0.154137	0.877502	1.0392	0.298714	-0.348577	0.727407	2.05328	0.0400456	0.734823	0.462447	0.130371	0.896273	0.23784	0.812005	-0.386223	0.699331	0.233192	0.815613	0.720347	0.471311
rs9527	1850524	C10orf32	2.22492	0.0260865	3.2786	0.00104325	-2.40775	0.0160512	2.39971	0.0164082	2.97732	0.00290778	3.33309	0.000858886	-1.23735	0.215958	3.34319	0.000828205	0.587561	0.556827	0.772543	0.439793
rs7257702	7570148	LMNB2	-0.1118	0.910982	1.64868	0.0992137	-0.500544	0.616692	0.371052	0.710599	1.92356	0.0544095	0.814772	0.415203	-1.52944	0.126156	1.42117	0.155268	0.681124	0.495793	1.83368	0.0667011
rs227584	20131	CTB-175E5.4;ASB16;ASB16-AS1	2.21281	0.0269107	-0.426159	0.669992	-0.25016	0.802463	-1.08331	0.278669	-0.129908	0.896639	0.671304	0.502027	-0.83198	0.40542	1.43951	0.150006	-1.44934	0.147243	1.48864	0.136583
rs755109	6100424	HEMGN	0.541836	0.587931	-0.833065	0.404808	3.20497	0.00135075	-1.08519	0.277838	0.0338685	0.972982	0.0440328	0.964878	1.50888	0.131328	-0.23949	0.810726	1.83085	0.0671235	2.75153	0.00593169
rs17482078	670161	CAST;ERAP1	-1.19914	0.230472	-1.05882	0.28968	0.566388	0.57113	-0.924623	0.355162	-1.48341	0.137965	-2.64461	0.00817852	0.827173	0.408139	-1.53908	0.123784	-0.639588	0.522441	-0.960896	0.336604
rs352213	1470121	FZD3	-0.390146	0.696429	0.141338	0.887603	0.591582	0.554131	1.17141	0.241433	-0.00701749	0.994401	0.206562	0.836352	1.39155	0.164058	-2.27912	0.0226598	1.76404	0.0777256	0.493147	0.621909
rs8102137	6370377	C19orf12	-0.317822	0.75062	0.182942	0.854843	-1.7468	0.0806719	-0.189319	0.849843	0.240804	0.809707	-0.331673	0.740136	-0.39539	0.692555	0.460538	0.64513	0.473888	0.63558	-0.997901	0.318328
rs7908476	2760202	AP3M1	1.20766	0.22718	-2.27156	0.023113	-0.456903	0.647741	-1.72746	0.0840854	-0.0479674	0.961742	0.987206	0.323542	0.930309	0.352211	-0.834878	0.403786	0.45636	0.648131	0.300138	0.764072
rs1671152	1300187	CTC-550B14.6;RDH13;CTC-550B14.7	-1.28445	0.198984	-0.291082	0.770989	-0.602801	0.546641	0.337831	0.73549	-0.338344	0.735104	-1.72	0.0854323	1.71328	0.0866612	-2.40152	0.0163271	1.78731	0.0738867	-0.54714	0.584283
rs12795905	1780600	CD3E	-0.659084	0.509842	0.541494	0.588167	-0.692213	0.488804	2.22864	0.0258381	-0.0628024	0.949924	-0.362046	0.717318	-1.14599	0.251801	0.301664	0.762908	-0.727546	0.466891	-0.443728	0.657239
rs164460	6380092	CAV3	0.0274863	0.978072	-1.41241	0.157831	1.18556	0.235797	-0.510212	0.609903	-0.540034	0.589173	-0.0722019	0.942441	0.616221	0.537749	-1.61641	0.106006	0.161069	0.872039	0.12001	0.904475
rs10144180	6760717	GOLGA5	1.42597	0.153877	1.96704	0.0491788	-1.8356	0.066417	1.10719	0.268212	3.93283	8.39506e-05	2.53507	0.0112426	0.675742	0.499204	2.69233	0.00709546	2.9604	0.00307237	4.06135	4.87898e-05
rs604845	110398	GPR83	0.491459	0.623102	1.66384	0.0961453	-3.18397	0.00145268	1.02985	0.303079	2.29365	0.0218106	0.692464	0.488646	0.782198	0.434098	2.3955	0.0165977	2.1747	0.0296523	1.10145	0.2707
rs8864	1070156	MESDC1	-1.16875	0.242506	1.29478	0.195395	-1.58553	0.112845	0.788991	0.430117	0.782413	0.433972	-0.382973	0.70174	0.503915	0.614321	0.159998	0.872883	1.28552	0.198612	-1.63786	0.10145
rs6519866	3520181	-	-2.26018	0.0238098	0.0254393	0.979705	-1.05042	0.293525	1.52362	0.127603	-0.0426754	0.96596	-1.51772	0.129085	1.30594	0.191572	-1.37199	0.170067	0.853278	0.393505	-1.34487	0.178667
rs2277862	5700689	CEP250	-0.383777	0.701144	-0.443314	0.657539	-0.547722	0.583883	-0.0643169	0.948718	0.432062	0.665696	-0.423039	0.672267	0.929516	0.352622	-0.637169	0.524015	0.960227	0.336941	0.786798	0.4314
rs9487094	5270670	RP5-919F19.5;AKD1	0.360361	0.718577	3.04854	0.0022996	-1.28056	0.20035	2.53576	0.0112203	3.32603	0.000880926	1.38096	0.167291	-1.11373	0.265397	1.67532	0.0938705	0.78397	0.433058	1.15796	0.24688
rs17642969	4200022	MIR17HG	-0.314278	0.75331	-0.0484776	0.961336	-0.00123259	0.999017	-1.00461	0.315087	-0.0206976	0.983487	-0.0153245	0.987773	0.680445	0.496223	0.930024	0.352359	-0.745316	0.456081	-0.339904	0.733929
rs849749	7210725	MRPL55	0.106234	0.915397	-1.45238	0.146395	0.871286	0.383598	0.105193	0.916222	-0.784293	0.432868	-0.282978	0.777193	1.40468	0.160116	-0.929021	0.352878	1.0514	0.293076	0.264185	0.791637
rs11764936	4490608	LRRC61;C7orf29	-1.28752	0.197914	0.528313	0.597282	-1.40592	0.159747	1.35655	0.174923	0.325373	0.744899	-0.728359	0.466394	-0.788034	0.430677	-1.30779	0.190946	-0.633277	0.526553	0.710619	0.477321
rs737941	7380192	SEC14L4	-0.96622	0.333934	-0.549084	0.582948	-0.745957	0.455694	-0.558665	0.57639	-1.76411	0.0777133	-1.61583	0.106132	0.488223	0.625392	-0.211058	0.832842	-0.49301	0.622006	-1.18332	0.236682
rs3009879	1510139	RP11-179H18.2	-0.0674768	0.946202	-0.898114	0.369125	0.450077	0.652655	-0.220574	0.825424	-1.07065	0.284328	-1.46111	0.143986	1.14495	0.252229	0.553834	0.579692	0.702203	0.482553	-0.616871	0.53732
rs2049805	1260039	THBS3	1.48086	0.138643	0.310417	0.756244	0.197529	0.843414	1.22736	0.219688	1.62767	0.103595	1.66046	0.0968218	1.72853	0.083893	0.0818268	0.934784	2.3854	0.0170606	2.81699	0.0048476
rs2950390	2060139	BAZ2A	-0.668866	0.503581	0.584213	0.559077	-0.325936	0.744473	0.413343	0.679355	-0.291148	0.770938	-0.643084	0.520169	1.0454	0.295837	-0.928343	0.35323	0.44627	0.655402	1.46334	0.143374
rs11666579	7380279	GLT25D1	-0.425892	0.670187	1.76877	0.0769314	-0.968286	0.332902	0.0516694	0.958792	1.74011	0.0818401	-0.0667726	0.946763	1.12918	0.258822	0.802943	0.422008	2.21619	0.0266786	1.44209	0.149276
rs1633921	7380546	FXYD5	-0.953629	0.340272	0.594809	0.551971	0.201693	0.840157	-0.424582	0.671142	1.10299	0.27003	1.29396	0.19568	0.500622	0.616637	0.552946	0.5803	0.876587	0.380711	1.77284	0.0762552
rs1061170	380424	CFH	0.798418	0.424628	-0.00151852	0.998788	-0.143736	0.885709	0.761446	0.446391	2.2629	0.0236416	2.38064	0.0172825	-0.55007	0.582271	1.14491	0.252247	0.251794	0.8012	0.951308	0.341448
rs2524054	1440603	-	1.33952	0.180401	-0.580692	0.561448	1.10426	0.269481	-2.05703	0.0396829	-0.898856	0.368729	1.27429	0.202562	-0.456517	0.648019	-0.405261	0.685285	-0.441851	0.658597	0.12039	0.904174
rs3867430	2190619	C5orf4	3.17679	0.00148915	-2.23995	0.0250945	4.5307	5.87891e-06	-0.866614	0.386153	-0.7869	0.431341	0.83041	0.406307	-0.856822	0.391543	2.01549	0.0438528	-1.73026	0.0835844	2.4582	0.0139637
rs1757171	1340400	CCDC167	-2.24901	0.0245121	2.46962	0.0135257	-1.01414	0.310517	1.33278	0.182605	0.908047	0.363854	-1.65847	0.097223	1.31479	0.188581	-1.16236	0.245091	-0.0035265	0.997186	-0.234582	0.814533
rs7317038	360706	GRTP1	1.73499	0.0827431	0.443077	0.65771	0.477303	0.633146	1.39408	0.163295	1.01994	0.307756	1.73901	0.0820328	-0.740831	0.458796	1.37551	0.168973	0.188982	0.850107	0.678238	0.497621
rs4809330	6420450	ZGPAT;LIME1;SLC2A4RG	2.27035	0.0231861	-0.197037	0.843799	-0.0240393	0.980821	0.749061	0.45382	1.03808	0.299235	1.27524	0.202223	-0.959124	0.337496	1.5838	0.11324	-0.434355	0.66403	1.74203	0.081503
rs1878047	6770343	CTD-2616J11.9;ETFB	-0.243595	0.807545	0.660987	0.508621	0.291843	0.770407	-0.0266132	0.978768	0.301211	0.763254	-0.131083	0.895709	-1.62176	0.104855	0.631793	0.527522	-1.73596	0.0825701	-0.409483	0.682185
rs6568591	3370746	MICAL1;ZBTB24	-0.387099	0.698683	-0.202154	0.839797	0.0932203	0.925729	0.098199	0.921774	-0.729845	0.465485	-0.81855	0.413043	-0.899777	0.368239	-1.34314	0.179227	-1.2908	0.196772	-1.06812	0.285465
rs7567849	6350392	SLC1A4	-2.84433	0.00445051	1.17954	0.238184	-0.230453	0.81774	0.817312	0.41375	0.0673946	0.946268	-2.47802	0.0132113	-1.17463	0.240144	-0.163119	0.870425	-0.347376	0.728309	-1.42021	0.155546
rs734553	3930546	SLC2A9	1.13748	0.255338	0.880441	0.37862	-0.0246532	0.980332	-0.605283	0.544991	0.641895	0.520941	1.31421	0.188777	-1.08793	0.276627	-0.218732	0.826859	-0.360072	0.718793	0.827373	0.408026
rs7155954	1660647	LGALS3	-0.378287	0.705217	1.46629	0.142569	-0.0419631	0.966528	1.95919	0.050091	1.40694	0.159446	-0.308596	0.757629	0.736043	0.461704	-0.915529	0.359914	1.54546	0.122236	0.647121	0.517554
rs3125734	1410408	ARID5B	0.0685743	0.945329	-0.221297	0.824861	-0.422013	0.673015	-1.04458	0.296216	1.37629	0.168732	1.14508	0.252175	0.105648	0.915862	2.33133	0.0197359	0.357828	0.720472	0.734987	0.462348
rs7944584	6940768	MYBPC3	0.579767	0.562072	-1.689	0.0912197	0.605846	0.544617	-1.96344	0.0495953	-1.71998	0.0854355	-0.111991	0.910831	0.65428	0.512932	-0.633601	0.526341	-0.534279	0.593148	-0.973506	0.330302
rs2664558	4050072	TMEM189-UBE2V1;TMEM189	0.578851	0.56269	0.357103	0.721014	1.22346	0.221157	0.682968	0.494627	1.10427	0.269476	0.502735	0.615151	0.175747	0.860492	1.50942	0.131191	0.847115	0.396931	1.20088	0.229798
rs642803	6580408	CTSW	-0.420035	0.67446	1.05134	0.293102	-0.200221	0.841308	2.3267	0.0199813	1.48227	0.138267	0.258499	0.796022	0.142714	0.886516	-0.952247	0.340972	2.09001	0.0366168	0.774264	0.438775
rs2074404	5260138	NSF	1.27186	0.203424	0.00387615	0.996907	1.21318	0.225062	0.492603	0.622293	1.66652	0.0956099	1.27329	0.202917	-0.454305	0.649609	-0.199693	0.84172	0.824348	0.409742	1.76448	0.0776507
rs8113088	4560601	ZFP14	-0.195473	0.845023	0.969918	0.332087	-0.636953	0.524155	1.78366	0.0744788	2.60831	0.00909896	0.795878	0.426103	1.41722	0.156419	0.111312	0.911369	2.39503	0.0166191	1.35681	0.174841
rs10466829	6370414	CLECL1	-0.119998	0.904485	5.87739	4.16791e-09	-4.7669	1.87079e-06	2.73806	0.00618028	6.28852	3.20503e-10	2.74457	0.00605904	-2.09593	0.0360887	2.46986	0.0135165	2.47464	0.013337	1.02783	0.304029
rs1335645	5870403	CEPT1	0.875249	0.381438	0.913192	0.361141	-0.153684	0.877859	0.384341	0.700726	0.525805	0.599024	-0.104381	0.916867	-0.723048	0.46965	1.0564	0.290784	0.377445	0.705843	1.05652	0.29073
rs3826061	5810598	TRAPPC2L;PABPN1L	-2.5864	0.0096983	1.33646	0.181399	0.964195	0.334948	2.45395	0.0141296	-4.48006	7.46232e-06	-4.20332	2.63026e-05	-1.73981	0.0818921	-1.91072	0.05604	-5.67233	1.40871e-08	-4.09687	4.18769e-05
rs549312	3830682	TTC9C	-1.37938	0.167777	0.0563447	0.955067	-0.521794	0.601814	0.195905	0.844684	1.60135	0.1093	-0.416892	0.676758	0.937691	0.348403	-0.667658	0.504352	2.44906	0.0143228	1.10648	0.268518
rs17623382	4150687	NDUFB2	-0.679599	0.496758	1.52915	0.126227	-0.540969	0.588529	0.744252	0.456724	0.86076	0.38937	-0.0634449	0.949412	-1.6939	0.0902852	-0.316782	0.751409	-0.0498644	0.96023	-0.424924	0.670892
rs2483058	2450762	IKBKE;C1orf147	-0.369826	0.711512	0.391243	0.695617	-0.0587227	0.953173	0.0343359	0.972609	0.884815	0.376256	-0.0901314	0.928183	0.0396922	0.968338	-1.07978	0.280241	0.681478	0.495569	-0.577359	0.563697
rs2890041	4280228	IVNS1ABP	-0.47459	0.635079	0.168031	0.866559	-1.01393	0.310614	0.0178964	0.985722	-0.657485	0.510869	-0.420825	0.673883	-1.35412	0.175698	-0.471595	0.637216	-1.59197	0.111393	-1.10322	0.269934
rs6859974	4040300	CTC-205M6.5	1.17821	0.238714	1.16851	0.242601	0.7961	0.425974	-0.551704	0.581151	1.17133	0.241468	0.985026	0.324611	1.11582	0.264498	0.723277	0.46951	1.5749	0.11528	2.28094	0.0225521
rs11982289	1030239	SCRN1	-2.23556	0.0253806	-1.67939	0.0930752	1.27905	0.20088	-2.98049	0.00287786	-2.01922	0.0434644	-2.48475	0.0129644	0.931829	0.351425	0.196992	0.843834	-0.342983	0.731611	-0.369089	0.712061
rs4771122	1090687	POLR1D	1.43136	0.152326	-0.18016	0.857027	0.315048	0.752725	-0.9588	0.33766	0.427515	0.669004	0.967798	0.333145	-0.272071	0.785567	-0.110752	0.911813	-0.746783	0.455194	0.2102	0.833512
rs4805834	6520687	SLC7A9	0.869011	0.384841	-0.416532	0.67702	0.298667	0.765194	-0.0815757	0.934984	0.213509	0.83093	0.268388	0.788401	0.090389	0.927978	0.437083	0.662051	-0.465132	0.641837	1.02942	0.303281
rs8106191	1050626	ZNF586	1.03646	0.299988	-0.999558	0.317524	0.888474	0.374286	-0.771161	0.440612	-1.46357	0.14331	-0.871688	0.383379	0.680818	0.495986	0.714518	0.474907	-1.15812	0.246816	0.706132	0.480106
rs6034875	3190634	DSTN	1.8215	0.0685301	-1.03229	0.301936	0.0250398	0.980023	-0.755184	0.450139	0.654838	0.512572	2.08186	0.0373556	1.65937	0.0970422	2.68071	0.00734656	1.38738	0.165327	2.95817	0.00309467
rs10751506	1440451	EXOSC2	-1.47936	0.139045	0.172187	0.863291	1.71643	0.0860826	0.273097	0.784779	-0.566535	0.57103	-1.02923	0.303372	0.215088	0.829699	-0.5152	0.606414	-0.156494	0.875643	0.728317	0.46642
rs386000	2470017	RPS9;LILRB3;LILRA6	0.0966343	0.923017	2.40428	0.0162045	-2.20256	0.0276256	2.41627	0.0156806	0.919507	0.35783	0.788914	0.430162	-1.55483	0.119988	0.658879	0.509974	-1.09567	0.273223	-0.528308	0.597286
rs6484672	1410201	CD59	1.84121	0.065591	-0.518377	0.604195	0.450632	0.652255	0.243051	0.807966	-1.302	0.192916	1.91512	0.0554768	0.106535	0.915158	1.91523	0.0554626	-0.835181	0.403616	1.00819	0.313366
rs989501	670037	-	0.681298	0.495683	-0.876159	0.380944	-0.740477	0.459011	-1.64723	0.0995099	0.201345	0.840429	1.23887	0.215393	0.0835254	0.933434	-0.22617	0.821069	0.67913	0.497056	-0.393928	0.693634
rs2299587	6180022	PCM1	0.369921	0.711442	1.78078	0.074949	-1.04977	0.293825	1.3774	0.168389	0.654108	0.513042	0.957387	0.338372	0.10772	0.914218	-1.11655	0.264186	1.50691	0.131833	0.495185	0.62047
rs3849942	3990411	C9orf72	-0.0355346	0.971653	2.12342	0.0337187	-0.603492	0.546182	-1.58041	0.114013	1.52065	0.128348	1.54661	0.121957	-0.947628	0.343319	2.36636	0.0179641	0.316545	0.751589	0.515989	0.605862
rs540719	1030358	COG7	-2.48885	0.0128158	-0.67503	0.499657	-0.148521	0.881931	0.550088	0.582259	-0.392087	0.694994	-1.88175	0.0598703	1.17073	0.241706	-0.57293	0.566692	0.293532	0.769116	0.193118	0.846867
rs1294707	7160066	C20orf196	-0.573952	0.566001	0.796661	0.425648	-0.36364	0.716127	1.97748	0.0479875	0.555716	0.578405	-0.486593	0.626547	-0.0615997	0.950882	0.138241	0.89005	0.479979	0.631242	0.431225	0.666305
rs314253	4180491	RP1-4G17.5;ELP5	0.663873	0.506772	0.699742	0.484089	-0.0145249	0.988411	-0.269029	0.787907	-0.213856	0.830659	0.232861	0.815869	-0.0405573	0.967649	0.00943531	0.992472	0.180782	0.856539	-0.162014	0.871295
rs13145700	580364	FIP1L1	-0.489184	0.624711	-0.282636	0.777456	0.984547	0.324847	-0.299498	0.76456	-0.801728	0.42271	-1.03472	0.300797	0.770706	0.440881	-2.74369	0.00607521	0.345114	0.730009	0.310796	0.755955
rs2364403	3180215	RP11-243J18.3;MSTO1;DAP3	0.994736	0.319865	-0.770858	0.440791	-0.0110759	0.991163	0.479293	0.63173	1.99941	0.0455636	1.12669	0.259874	0.05159	0.958855	1.18079	0.237685	0.398807	0.690035	1.14758	0.251142
rs4409675	3420561	RPA2	0.0985972	0.921458	0.618318	0.536366	0.739529	0.459586	-0.375728	0.707119	-0.782383	0.433989	-1.48857	0.1366	1.2158	0.224062	-0.368239	0.712695	0.0990893	0.921067	-0.505273	0.613367
rs7217004	3390477	C17orf79	-2.73466	0.00624445	-0.198566	0.842602	-0.846056	0.397521	-0.181401	0.856053	0.556208	0.578069	-1.41116	0.158197	1.71302	0.0867082	0.560659	0.57503	2.24625	0.0246878	0.0484644	0.961346
rs2967605	5670735	RP11-886P16.6;MARCH2	-0.0804	0.935919	0.505285	0.613359	-0.233845	0.815105	0.288204	0.77319	0.848883	0.395947	-0.215658	0.829254	0.335989	0.736879	-0.236976	0.812675	0.388895	0.697354	-0.31756	0.750819
rs6761	3290338	POLR2A	-0.343752	0.731033	0.247277	0.804694	-1.64932	0.0990812	-0.313265	0.754079	-1.26972	0.204185	-1.10394	0.269618	-0.715649	0.474208	-2.01997	0.0433865	-1.84671	0.064789	-1.98948	0.0466481
rs199814	4390647	RP5-1004I9.1	-0.845016	0.398102	0.553981	0.579592	0.984515	0.324862	-0.0387896	0.969058	-0.761139	0.446574	-0.937136	0.348689	1.61886	0.105477	-0.174688	0.861325	0.762065	0.446021	-0.167052	0.867329
rs338479	1070292	AKNAD1;GPSM2	0.901781	0.367173	0.0828273	0.933989	0.530559	0.595725	0.262209	0.79316	0.390457	0.696199	0.417603	0.676237	-0.423108	0.672217	0.436782	0.66227	-0.214862	0.829875	0.124745	0.900725
rs12598	2260255	NFATC3	0.437768	0.661554	-1.69647	0.0897966	0.0309082	0.975343	-0.264358	0.791504	2.63181	0.00849305	0.645666	0.518496	4.27758	1.88938e-05	-1.20235	0.229228	3.09061	0.00199745	2.81877	0.00482085
rs1446682	2810632	PTK2B	0.0851393	0.932151	0.33927	0.734406	-0.716375	0.47376	-0.545152	0.585649	0.279256	0.780048	-0.537806	0.590711	1.10585	0.26879	1.12768	0.259456	1.30756	0.191022	0.414759	0.678318
rs7188573	6020630	MMP25	0.710083	0.477653	3.93516	8.31419e-05	-1.61543	0.106218	1.22717	0.219757	1.7211	0.0852336	1.61167	0.107034	-0.343311	0.731364	1.45961	0.144397	1.13414	0.256736	2.15651	0.031044
rs3761793	7040327	ALDH5A1	3.25913	0.00111754	-2.42691	0.0152282	8.49073	2.0535e-17	-2.53806	0.0111469	0.289603	0.77212	3.0599	0.00221414	0.241877	0.808875	0.937513	0.348495	-0.91041	0.362606	2.64376	0.00819909
rs4954221	3840079	RAB3GAP1;ZRANB3	-1.933	0.0532363	1.58174	0.113709	-1.35746	0.174635	0.175879	0.860389	1.68809	0.0913941	-0.839318	0.401291	0.66991	0.502915	-1.40548	0.159879	1.50184	0.13314	-0.489318	0.624616
rs12720356	6900424	TYK2	1.64878	0.0991936	1.28427	0.199049	-1.06269	0.28792	0.17035	0.864735	1.39477	0.163085	1.87825	0.0603468	-0.818287	0.413194	0.713627	0.475458	-0.648834	0.516446	-0.838619	0.401683
rs13097782	4830025	-	0.434649	0.663817	1.14323	0.252943	-0.55614	0.578115	0.577249	0.563771	0.515464	0.606229	0.874471	0.381862	-2.1038	0.035396	1.48772	0.136825	-1.14305	0.253017	-0.815275	0.414915
rs9253	5700692	MEAF6	-0.260513	0.794468	1.71782	0.0858289	-0.679974	0.496521	2.43909	0.0147244	0.456269	0.648197	-0.287452	0.773766	-1.38012	0.16755	0.336185	0.736731	-0.765482	0.443985	0.392582	0.694628
rs13129697	3930546	SLC2A9	1.21437	0.224608	0.925697	0.354604	-1.45147	0.14665	-0.0521538	0.958406	1.23394	0.217225	0.75862	0.44808	-0.9599	0.337106	-0.0556597	0.955613	-0.360974	0.718119	0.949033	0.342604
rs17122021	150202	MPZL2	-0.782648	0.433834	1.12672	0.25986	-1.97253	0.0485487	0.0625424	0.950131	1.47018	0.141512	0.0691273	0.944888	1.35408	0.175711	-1.39014	0.164487	2.17633	0.0295307	0.549639	0.582567
rs17316633	4120465	GAR1	0.859155	0.390255	1.39385	0.163363	-1.44296	0.149033	0.242764	0.808189	1.72212	0.0850473	1.3521	0.176343	-1.31782	0.187564	1.721	0.0852507	0.490304	0.623919	1.24876	0.211755
rs369573	4250452	DNAJC10	0.461216	0.644644	0.930476	0.352124	-0.319797	0.749122	0.884088	0.376649	3.47206	0.000516484	1.64421	0.100132	-0.0767671	0.938809	2.79746	0.00515055	1.53676	0.124353	1.49041	0.136115
rs2253412	3830471	TESPA1	-0.347391	0.728297	2.69111	0.00712139	-1.91283	0.0557703	1.53387	0.125062	3.06463	0.00217941	1.06547	0.286662	1.42897	0.153013	1.01737	0.308979	2.28717	0.0221858	3.38184	0.000720017
rs3761959	620167	FCRL3	1.36857	0.171133	3.58904	0.000331899	-1.0833	0.278676	5.17153	2.32181e-07	5.72347	1.0437e-08	3.48962	0.000483709	0.164513	0.869327	2.29472	0.0217489	4.25892	2.0542e-05	5.37636	7.60075e-08
rs2844479	1260538	ATP6V1G2-DDX39B;ATP6V1G2	0.778629	0.436198	-1.84951	0.0643844	1.35374	0.175819	-1.94534	0.0517335	0.499012	0.617771	0.101707	0.918989	1.6281	0.103503	-0.292859	0.76963	1.31296	0.189198	0.874876	0.381642
rs9275698	3940477	TAP2	1.03861	0.298987	-0.68494	0.493382	0.717642	0.472978	-0.210112	0.83358	0.348616	0.727378	1.96599	0.0493003	-0.271854	0.785734	2.14139	0.0322423	-0.566739	0.570892	-0.0148033	0.988189
rs6430585	5690274	MCM6	0.0549052	0.956214	3.2751	0.00105623	-2.68	0.00736225	2.97153	0.00296319	3.07909	0.00207632	1.92936	0.0536859	-0.645014	0.518918	0.949178	0.34253	0.940955	0.346728	2.02316	0.0430563
rs10425451	6590689	AC008746.12	-2.35118	0.0187141	-1.88559	0.0593508	1.77076	0.0766003	1.26265	0.206713	-4.35718	1.31749e-05	-3.49062	0.000481903	1.42899	0.153007	-2.09587	0.0360937	-2.7212	0.00650458	-2.2902	0.0220098
rs1106911	3460086	SSH1	-1.12399	0.261018	-1.45697	0.145124	0.871905	0.38326	-0.618293	0.536382	-0.629554	0.528987	-1.01598	0.309641	0.393029	0.694298	-0.514875	0.60664	-0.277296	0.781553	-0.545947	0.585102
rs11699815	4560170	SCAND1	0.405779	0.684905	-0.166283	0.867934	0.812171	0.416694	0.484274	0.628191	0.735778	0.461866	0.105542	0.915946	0.971466	0.331316	0.0148657	0.988139	1.24607	0.212739	0.898297	0.369027
rs17512962	5860187	PHYH	2.69474	0.0070444	-1.2552	0.209406	1.306	0.191553	-1.08518	0.277843	0.333378	0.738849	1.71166	0.0869599	0.574572	0.565581	2.0561	0.0397733	0.95211	0.341041	2.25331	0.0242396
rs2422976	1980059	RASSF2	-0.291635	0.770566	0.666185	0.505293	1.55055	0.121009	1.48997	0.136232	0.287599	0.773654	0.328967	0.742181	0.286506	0.774491	0.616826	0.53735	0.824229	0.409809	0.512553	0.608264
rs6502769	450300	RP11-810M2.2;CYB5D2;ANKFY1	-0.424019	0.671552	-0.496555	0.619503	1.74347	0.0812524	-1.05358	0.292074	0.459323	0.646002	0.185042	0.853196	0.576826	0.564057	-0.20092	0.840761	0.661696	0.508166	0.098882	0.921232
rs415530	6370661	AP2S1	-2.93712	0.00331276	2.38373	0.0171383	0.0103115	0.991773	0.535233	0.592488	1.46933	0.141743	-1.07138	0.283998	-1.07571	0.282055	0.474393	0.63522	-0.670216	0.50272	-0.879902	0.378913
rs2056938	5090097	SYS1;SYS1-DBNDD2	-0.0375872	0.970017	1.24457	0.213289	0.355143	0.722483	0.595611	0.551435	0.640698	0.521719	0.175873	0.860394	-0.166199	0.868	0.1695	0.865403	0.882545	0.377482	1.10513	0.269101
rs527143	3940202	RP11-35G9.3;RP11-35G9.5;ATP8B1	-1.21201	0.225508	-0.157872	0.874558	-0.460777	0.644959	2.08298	0.0372527	1.61421	0.106481	0.565719	0.571585	3.9941	6.49399e-05	0.61553	0.538205	4.69898	2.6146e-06	1.8911	0.0586116
rs7779057	6580379	COG5	0.624891	0.532043	-0.771991	0.44012	0.945015	0.344651	0.222229	0.824136	-0.98645	0.323912	0.112562	0.910378	1.35717	0.174726	0.588401	0.556263	0.0626857	0.950017	0.490389	0.623859
rs27993	2690544	LNPEP	-0.116336	0.907386	0.501937	0.615712	0.426534	0.669719	1.5037	0.132658	-0.431063	0.666423	-1.38468	0.16615	-1.11826	0.263458	-0.235733	0.81364	-1.7053	0.0881377	-1.1951	0.232048
rs12029367	3840463	TADA1	-0.57181	0.567451	-0.729379	0.46577	-1.13656	0.255721	0.299426	0.764615	-1.07761	0.281208	-1.30813	0.19083	1.24586	0.212817	0.00641345	0.994883	-0.327241	0.743486	0.36492	0.715171
rs7124676	2630056	PRDX5	-0.259948	0.794904	0.564512	0.572406	-1.13405	0.256773	0.824011	0.409933	1.50949	0.131173	1.47722	0.139616	1.5807	0.113946	0.917708	0.358772	1.828	0.0675497	0.344514	0.73046
rs6420094	6760008	DBN1	0.38756	0.698342	1.07973	0.280263	-0.153419	0.878068	1.01428	0.310452	0.506993	0.61216	1.45828	0.144764	-1.04422	0.296383	0.689686	0.490392	0.0368687	0.97059	0.181021	0.856351
rs2851391	2100537	PKNOX1	-1.72294	0.0849002	-0.731332	0.464577	0.439816	0.660071	-0.976618	0.328758	-1.9217	0.054643	-3.0557	0.00224534	1.47271	0.140831	-2.18469	0.0289117	0.258127	0.796309	-1.30925	0.190451
rs4806608	1740328	-	-0.216137	0.828881	1.73373	0.0829656	-0.211363	0.832604	-0.645767	0.51843	1.72168	0.0851266	0.947657	0.343304	0.39519	0.692703	0.620422	0.53498	1.57331	0.115647	1.52046	0.128395
rs1672770	7210121	TRNT1	-1.24544	0.21297	-0.880507	0.378585	0.541835	0.587932	1.17892	0.238429	-1.71038	0.0871951	-0.946356	0.343967	2.07765	0.0377414	-1.24031	0.214859	0.403445	0.686621	0.424166	0.671445
rs17146964	2000224	FAM89B	0.468079	0.639728	0.562329	0.573892	-1.41855	0.15603	0.510144	0.609951	1.48545	0.137425	1.38474	0.166133	0.567961	0.570061	0.956819	0.338659	0.932501	0.351078	0.846469	0.397291
rs4409728	780341	CCDC3	0.113963	0.909267	-1.02206	0.306751	0.843083	0.399182	0.698278	0.485003	-0.0471772	0.962372	-0.0917033	0.926934	2.01852	0.0435375	0.966507	0.33379	0.631081	0.527988	-0.252708	0.800494
rs3816085	1010152	KIAA0922	0.782297	0.43404	-0.653708	0.5133	-0.425954	0.670141	0.369207	0.711974	-0.829927	0.40658	-0.205175	0.837436	-0.89574	0.370391	1.84727	0.0647083	-1.0949	0.27356	-1.17351	0.240591
rs1043235	5960767	CRKL	-0.363827	0.715987	0.957626	0.338251	0.556051	0.578176	0.258618	0.79593	0.352319	0.724599	0.0210533	0.983203	-1.33226	0.182776	1.85671	0.0633517	-0.316166	0.751876	0.296417	0.766912
rs2016266	6900600	MFSD5	1.63515	0.102017	-1.25198	0.210578	1.50974	0.13111	-0.589405	0.55559	-0.323519	0.746303	0.985182	0.324534	2.56367	0.0103572	1.1805	0.2378	1.52689	0.126788	3.02361	0.00249774
rs162034	3120373	MTRR	-1.34015	0.180195	1.46667	0.142465	-2.40133	0.0163358	3.21944	0.00128439	2.32203	0.0202313	0.363448	0.71627	1.18218	0.237135	-0.547546	0.584004	1.89732	0.0577851	2.43136	0.0150423
rs3811647	4480224	SRPRB	0.766882	0.443152	1.13561	0.256119	-1.59815	0.110011	1.66877	0.0951633	2.44294	0.0145683	1.89762	0.0577468	0.583841	0.559327	0.221523	0.824686	2.16473	0.0304082	1.64957	0.09903
rs4821610	110382	Z82188.1;RAC2	0.0886391	0.929369	-2.13366	0.0328704	2.57828	0.00992941	-1.76994	0.0767377	-0.778397	0.436335	-0.262793	0.79271	1.79347	0.0728979	0.257908	0.796478	1.45498	0.145675	1.45082	0.146829
rs4982987	2370010	RP11-104E19.1;GZMH	1.89844	0.0576387	0.139042	0.889417	0.146347	0.883647	-1.9036	0.0569622	0.217481	0.827833	0.554284	0.579384	-1.59765	0.11012	-0.275074	0.783259	-0.828649	0.407303	-0.798388	0.424645
rs2290775	7610184	PNKP	2.36851	0.0178598	-0.789321	0.429924	0.680736	0.496038	0.419866	0.674583	-0.312795	0.754436	1.46481	0.142974	1.09447	0.273748	2.24042	0.0250639	-0.0982017	0.921772	1.92318	0.0544573
rs11699077	3830180	VPS16;PTPRA	0.791228	0.428811	0.94903	0.342605	0.106594	0.915111	1.7759	0.0757497	1.53815	0.124012	1.80785	0.0706292	0.132753	0.894389	1.52246	0.127894	0.244807	0.806606	2.0465	0.0407068
rs1805389	6840020	TNFSF13B	1.06517	0.286797	-0.619694	0.535459	-1.4603	0.144207	1.60426	0.108657	2.98965	0.00279296	0.911017	0.362287	2.01811	0.0435796	-0.613516	0.539535	2.38043	0.0172926	2.04844	0.0405168
rs9458975	6900215	GTF2H5	1.25481	0.209547	-0.0229858	0.981662	0.417069	0.676628	-1.32987	0.183561	0.0491182	0.960825	0.0437153	0.965131	-0.080749	0.935642	0.11725	0.906662	-0.699453	0.484269	1.76949	0.0768125
rs9444348	1980674	SYNCRIP	0.83297	0.404862	-0.279559	0.779816	0.341275	0.732896	-1.70421	0.0883417	-1.99165	0.0464092	-1.72014	0.0854075	-1.94623	0.0516266	-1.96491	0.0494252	-2.50968	0.0120842	-4.32921	1.49645e-05
rs10489268	5690398	TNFSF4	2.80839	0.00497905	-1.01243	0.311331	2.09729	0.0359676	-0.484922	0.627731	0.254129	0.799396	2.41097	0.0159101	-0.672008	0.501579	0.575853	0.564715	-0.743037	0.45746	1.65982	0.0969516
rs2875906	2490152	ENPP2	-0.701421	0.48304	0.692995	0.488313	-0.79157	0.428611	0.532134	0.594633	0.526049	0.598854	-1.45441	0.145832	-0.454588	0.649406	-0.015666	0.987501	-0.237569	0.812216	-0.378908	0.704756
rs3093024	2850100	RP11-514O12.4;RNASET2	2.84406	0.0044542	1.8546	0.0636536	-0.317915	0.750549	1.63666	0.101702	2.425	0.0153083	2.77453	0.00552814	0.269378	0.787639	1.91706	0.0552306	1.17384	0.240458	4.05286	5.05947e-05
rs1412444	4890327	IFIT5	-0.792708	0.427948	0.277969	0.781036	1.24065	0.214735	-0.457434	0.647359	-0.638788	0.522961	-1.39473	0.163098	-0.929762	0.352494	-0.710777	0.477223	-0.9234	0.355799	-0.878034	0.379925
rs1554669	3890689	-	0.132967	0.894219	-1.92186	0.0546228	-0.878293	0.379785	-0.687776	0.491594	-1.05909	0.289557	-1.5587	0.119067	0.129381	0.897056	-1.13721	0.25545	-0.538486	0.590241	-1.16339	0.24467
rs4845552	150100	S100A4;S100A3	-0.257788	0.79657	-1.44517	0.148411	0.728309	0.466425	-0.488656	0.625085	-1.32887	0.183892	-0.493262	0.621827	-0.496385	0.619623	-0.526889	0.59827	-0.337817	0.735501	-0.748135	0.454379
rs11655895	2370072	PRR11;CTD-2510F5.6	0.824968	0.40939	0.107423	0.914453	-2.148	0.0317138	0.346093	0.729273	-0.609301	0.542325	0.0255283	0.979634	-0.091763	0.926886	-0.367641	0.713141	-0.768696	0.442074	-0.39105	0.69576
rs12914385	4040711	PSMA4	0.0583589	0.953463	0.114312	0.90899	-0.434324	0.664053	1.39004	0.164515	1.0521	0.292755	-0.820347	0.412018	0.350134	0.726238	0.0926047	0.926218	0.135622	0.89212	0.756672	0.449246
rs7189020	4150563	MPG;NPRL3	1.24992	0.211329	-0.738738	0.460066	1.68317	0.0923427	-2.01838	0.0435516	-0.444013	0.657033	-0.127797	0.89831	0.347795	0.727994	-1.30908	0.190507	-0.0608066	0.951513	-0.586612	0.557465
rs3932409	1470349	RPLP0	0.903443	0.366291	0.142051	0.88704	-0.0588471	0.953074	0.242142	0.80867	1.36929	0.17091	1.89324	0.0583262	1.6356	0.101924	2.29242	0.0218812	1.63185	0.102711	2.8399	0.00451275
rs8012266	1510601	SAMD4A	-1.19569	0.231819	-0.895067	0.370751	1.4401	0.14984	-1.69886	0.0893455	-1.38463	0.166165	-1.16186	0.245294	-0.269103	0.787851	-0.14194	0.887128	-0.768167	0.442388	-1.62855	0.103408
rs4750934	6100347	PTPRE	0.720694	0.471098	-1.69842	0.0894277	1.34702	0.177975	-0.829188	0.406998	-0.711124	0.477007	-0.491901	0.62279	1.62283	0.104626	0.136849	0.89115	0.926509	0.354182	0.662336	0.507756
rs12570358	1940288	TYSND1	-1.0996	0.271505	0.629735	0.528868	0.715152	0.474515	1.82535	0.0679475	0.120162	0.904355	-0.318314	0.750247	1.07819	0.28095	-0.959984	0.337063	1.15085	0.249796	0.438276	0.661186
rs7925289	4210072	CLNS1A;AQP11	0.921077	0.35701	0.805605	0.420471	-0.355054	0.722549	0.325883	0.744513	1.04745	0.294891	0.949027	0.342607	0.56398	0.572768	1.56193	0.118305	0.653373	0.513516	1.65596	0.0977299
rs4622329	2630687	CHPT1	0.663852	0.506785	1.25972	0.207771	-0.0192627	0.984632	0.0690865	0.944921	0.655147	0.512373	0.832697	0.405016	0.0435884	0.965232	-0.470683	0.637867	0.101804	0.918912	2.01535	0.0438685
rs10894147	430541	TMEM45B	3.42752	0.000609124	-2.97096	0.00296872	1.62856	0.103406	-0.597542	0.550146	-0.6003	0.548306	0.724658	0.468662	4.03865	5.37595e-05	2.9904	0.00278609	3.01355	0.00258209	6.41907	1.37106e-10
rs9263739	1500753	VARS2	1.26136	0.20718	-0.803996	0.421399	0.830734	0.406124	0.152464	0.878821	-0.201671	0.840174	0.709703	0.477888	0.769378	0.441669	0.428232	0.668482	-0.101079	0.919488	0.730107	0.465325
rs752278	6650452	DET1	-0.390943	0.695839	-0.0563315	0.955078	0.0270368	0.97843	-0.276479	0.782181	-0.872532	0.382918	-0.79395	0.427225	0.400423	0.688845	-0.177816	0.858868	-0.244455	0.806879	0.498476	0.618148
rs2502731	2940192	-	-1.78254	0.0746618	2.50989	0.0120769	-1.06727	0.285852	2.9465	0.00321394	0.698225	0.485037	-1.83613	0.0663383	-2.26475	0.0235279	0.30909	0.757253	-1.7426	0.0814029	-2.03986	0.0413641
rs12669528	7610563	SP4	1.36266	0.172989	1.43016	0.152672	-0.69539	0.486811	1.33858	0.180708	3.67909	0.000234068	2.72891	0.00635434	0.481757	0.629978	1.7209	0.0852685	1.88026	0.0600725	2.81568	0.0048674
rs570880	3290743	IL29	-1.66533	0.0958475	-0.129206	0.897195	1.33843	0.180755	1.20825	0.226952	-0.384138	0.700876	-1.32335	0.185719	1.44124	0.149516	0.552962	0.580289	0.927189	0.353829	1.04983	0.293795
rs262962	2680538	MAP6D1	-2.61956	0.00880438	1.81319	0.069803	-1.00613	0.314355	1.68859	0.0912983	-0.436583	0.662414	-2.13751	0.0325561	0.203432	0.838797	-0.958689	0.337715	-0.5654	0.571802	-1.84936	0.0644055
rs266717	2030315	RFC4	-0.438166	0.661266	-1.05893	0.289634	0.666597	0.50503	-0.393142	0.694215	0.504716	0.613758	0.337346	0.735856	1.8412	0.0655918	-0.0129867	0.989638	1.22582	0.220266	2.29432	0.0217719
rs3731896	3890528	ATG9A	-0.493546	0.621627	0.428943	0.667964	-0.442097	0.658419	-0.517768	0.60462	-0.0357994	0.971442	0.158299	0.874221	-0.129903	0.896643	-0.426794	0.669529	-0.169009	0.86579	-1.14204	0.253438
rs1011731	580601	PIGC;C1orf105	-0.189803	0.849463	0.393452	0.693986	0.174028	0.861844	0.529576	0.596406	0.301204	0.763259	-0.0327901	0.973842	0.286519	0.774481	-0.289017	0.772568	-0.186435	0.852103	0.84965	0.39552
rs6088792	7100544	EDEM2	1.26716	0.205099	-0.359745	0.719038	0.196545	0.844184	-0.034789	0.972248	-0.845813	0.397657	0.624972	0.53199	1.17211	0.241153	1.97085	0.048741	-0.192332	0.847482	1.64737	0.0994828
rs255049	3840519	DPEP3	1.9301	0.053594	-3.65676	0.000255421	2.68327	0.00729059	-1.53393	0.125048	-1.82801	0.0675481	-0.565702	0.571596	0.221641	0.824594	-0.110178	0.912269	-1.70992	0.087281	0.00459876	0.996331
rs1108842	5270681	MUSTN1;TMEM110-MUSTN1;TMEM110	-0.848724	0.396035	-1.01271	0.3112	0.266124	0.790144	-0.798172	0.424771	-2.23168	0.0256361	-1.39038	0.164415	-0.412274	0.680138	-0.137298	0.890795	-3.00325	0.0026711	-1.44831	0.14753
rs11769924	6510196	TRIM24	1.49323	0.135378	0.0732319	0.941622	-0.350308	0.726108	1.13914	0.254645	0.731872	0.464247	1.51784	0.129055	1.684	0.0921813	-0.231204	0.817156	0.937739	0.348379	0.757143	0.448964
rs5415	7210682	ACAP1	-0.59512	0.551763	0.273071	0.784799	-0.654864	0.512555	0.582319	0.560352	-0.465037	0.641905	-0.709311	0.478132	1.02201	0.306776	0.557434	0.577231	0.0130395	0.989596	-1.71631	0.0861047
rs606458	3610743	SF1	-0.945925	0.344187	-1.25836	0.208261	-0.359117	0.719508	-0.764111	0.444801	1.52593	0.127028	-1.5029	0.132865	7.15165	8.57412e-13	-0.228338	0.819384	5.69348	1.24478e-08	4.50318	6.6943e-06
rs10503733	2900224	ENTPD4	-0.133212	0.894026	-1.74982	0.0801496	0.267146	0.789357	-1.11933	0.263002	-1.06509	0.286836	-1.2605	0.207489	1.93419	0.0530902	0.0300312	0.976042	-0.0534119	0.957404	0.463646	0.642902
rs2403254	1030259	HPS5	-0.701036	0.48328	1.60776	0.107887	-0.182443	0.855235	1.0625	0.28801	1.15526	0.247984	-0.088286	0.929649	-1.69265	0.090522	-0.591831	0.553964	-0.455646	0.648644	-0.615284	0.538367
rs7485057	2490441	ASB8	2.29865	0.021525	0.302207	0.762494	-2.30165	0.0213548	-0.598614	0.54943	0.856394	0.39178	1.94724	0.0515065	0.0483593	0.96143	3.18213	0.00146194	0.105812	0.915732	1.40752	0.159274
rs6983986	4250632	SAMD12	0.668195	0.504009	-0.0831659	0.93372	0.947711	0.343276	-0.307162	0.75872	0.0620775	0.950501	0.376206	0.706764	-0.313172	0.75415	0.0178313	0.985773	-0.04888	0.961015	-0.235686	0.813676
rs12198173	5560541	SKIV2L	0.41505	0.678105	0.0640309	0.948946	0.226581	0.82075	-0.729265	0.465839	-0.340246	0.733672	0.505435	0.613254	-1.32024	0.186755	-0.125771	0.899914	-1.64401	0.100175	-0.357421	0.720777
rs6859974	2000292	SCGB3A1	0.0967377	0.922935	0.220525	0.825462	0.222576	0.823866	0.563613	0.573018	-0.288693	0.772816	1.04946	0.293965	-0.882743	0.377375	0.63329	0.526544	-0.418522	0.675566	1.02093	0.307288
rs2621416	6450692	PSMB9	2.55359	0.0106618	-0.586271	0.557693	-0.617324	0.537021	-0.655143	0.512376	1.34104	0.179909	1.83095	0.0671084	-0.14381	0.885651	0.62484	0.532076	0.158319	0.874205	2.01635	0.0437635
rs7342306	6250487	CD9	-0.617965	0.536599	0.659813	0.509374	-0.340624	0.733387	1.00736	0.31376	-0.62788	0.530083	-0.871216	0.383636	2.3931	0.0167068	0.843568	0.398911	0.743651	0.457088	0.660115	0.50918
rs2287102	6590309	POLE4	-1.20226	0.229261	-2.15033	0.0315295	1.01909	0.30816	-0.531078	0.595365	-1.88577	0.0593263	-2.29467	0.0217519	-0.770375	0.441078	0.0831087	0.933765	-1.6435	0.10028	-2.49727	0.0125155
rs7756771	4220347	LRRC1	-0.394136	0.69348	2.45041	0.0142693	-1.65845	0.0972275	3.03176	0.00243134	2.15255	0.0313539	0.237736	0.812086	1.47869	0.139223	1.31764	0.187625	2.24905	0.0245096	0.569761	0.56884
rs2553021	3370451	GNB2	0.249541	0.802943	-0.697762	0.485326	1.10333	0.269882	-0.874616	0.381783	-2.03922	0.0414283	-0.0302607	0.975859	0.664021	0.506677	0.669455	0.503205	-0.479123	0.631851	0.651044	0.515018
rs9605145	1660059	TPTEP1;KB-7G2.9	0.954257	0.339953	-0.332078	0.739831	-0.188647	0.85037	-0.124551	0.900879	1.92738	0.0539317	1.77208	0.0763805	1.80658	0.0708279	-0.943979	0.34518	2.58255	0.00980745	2.78931	0.00528206
rs10173197	6200768	PPP3R1	-0.47754	0.632978	0.754892	0.450314	0.0602209	0.95198	0.250908	0.801885	1.19838	0.230768	-0.271134	0.786288	0.758926	0.447897	0.961828	0.336136	1.40531	0.159928	0.979191	0.327486
rs2269426	1820538	RDBP	0.926968	0.353943	0.81786	0.413437	-0.953336	0.34042	-0.359338	0.719342	1.16908	0.242371	1.35669	0.174878	0.580424	0.561629	1.70958	0.087343	0.530782	0.59557	1.33401	0.182201
rs847997	6250189	VWDE	-0.166903	0.867447	3.10856	0.00188	-2.41429	0.0157658	2.20512	0.0274455	3.12999	0.00174811	0.337368	0.73584	-3.23448	0.00121866	0.618578	0.536194	-0.0109289	0.99128	-0.66704	0.504746
rs17577590	5810440	HNRNPAB;AGXT2L2	-0.756684	0.449239	-0.154173	0.877473	0.652062	0.514361	0.370837	0.710759	0.28911	0.772497	-0.897242	0.36959	0.133774	0.893581	0.295261	0.767795	0.579036	0.562565	1.29953	0.193762
rs11750814	1470750	CDC23	-0.413136	0.679507	2.60137	0.00928515	-2.66453	0.00770967	2.05935	0.0394612	1.89637	0.0579111	1.58097	0.113885	-0.316883	0.751333	0.282023	0.777926	0.934209	0.350196	0.25965	0.795133
rs9263739	3800358	HCG27	1.33019	0.183455	1.48129	0.138528	-1.37659	0.168638	2.49454	0.012612	2.36306	0.0181246	2.26052	0.0237887	0.771353	0.440498	0.915286	0.360042	1.24319	0.213799	2.60892	0.00908297
rs968567	2360020	FADS2;FADS1	0.0790923	0.936959	1.00264	0.316035	-0.81104	0.417342	-0.747039	0.45504	1.14345	0.252851	0.813593	0.415878	0.529057	0.596766	1.13923	0.254609	0.878988	0.379408	1.24132	0.214486
rs102275	2360020	FADS2;FADS1	-0.625283	0.531785	1.62403	0.104369	-1.78768	0.0738272	0.494392	0.621029	2.41339	0.0158048	0.757693	0.448635	1.46822	0.142043	0.640569	0.521803	2.22622	0.0259997	1.72837	0.0839218
rs7944584	6650575	MADD	-0.703287	0.481877	1.4499	0.147087	-0.740126	0.459223	0.0390946	0.968815	-0.274394	0.783782	-0.235888	0.81352	-1.27577	0.202036	0.373421	0.708835	-0.814981	0.415083	-0.926717	0.354073
rs4938642	4120037	-	2.07549	0.0379415	0.670053	0.502824	-1.89267	0.0584017	1.34315	0.179223	0.39396	0.69361	0.895921	0.370295	-0.501497	0.616021	0.161398	0.87178	-0.127804	0.898304	0.676008	0.499036
rs9921587	4280669	RBL2	-1.40495	0.160035	5.78666	7.18011e-09	-3.33793	0.000844055	5.34536	9.02391e-08	4.86501	1.14454e-06	1.95968	0.050033	0.962394	0.335852	-0.583889	0.559295	3.05729	0.00223349	2.0593	0.0394654
rs7512898	1300279	DDX59	1.47095	0.141304	0.65615	0.511728	0.295611	0.767527	0.187735	0.851084	1.30011	0.193564	1.94334	0.0519748	-0.491001	0.623425	1.53022	0.125963	0.140736	0.888078	-0.333636	0.738654
rs698465	1740259	RP11-508N12.2	-0.290646	0.771322	0.746377	0.455439	0.215867	0.829091	0.203825	0.83849	-0.413845	0.678987	-0.180074	0.857094	-0.229693	0.81833	0.368456	0.712533	-0.253417	0.799946	-0.94303	0.345666
rs1026520	7510747	MBP	1.67563	0.093811	-1.30749	0.191046	-1.4915	0.135831	-2.32428	0.0201103	0.656133	0.511739	0.849985	0.395333	1.43887	0.150188	-0.901115	0.367527	-0.30105	0.763377	0.8178	0.413471
rs17448633	4730619	CNOT6L	0.266212	0.790076	2.28364	0.0223926	0.217908	0.827501	0.634179	0.525964	1.45473	0.145743	1.6155	0.106202	-2.19256	0.0283388	0.768255	0.442336	-0.349915	0.726402	-0.587268	0.557024
rs10485165	4120300	RP11-459O1.2	0.372459	0.709551	-0.0944241	0.924772	-1.43523	0.151221	0.085505	0.93186	0.226348	0.820931	0.679881	0.49658	0.14039	0.888352	0.267609	0.789	-0.185005	0.853225	0.894825	0.370881
rs9378249	1440603	-	0.8624	0.388468	-0.114039	0.909207	0.269658	0.787423	0.666074	0.505364	0.590962	0.554546	1.71429	0.0864746	0.312788	0.754441	2.54853	0.0108177	0.338757	0.734793	1.91735	0.0551939
rs4940554	1030100	-	0.855222	0.392428	1.04729	0.294968	0.449232	0.653264	0.994696	0.319884	0.803475	0.4217	1.03971	0.298474	-0.421995	0.673029	-0.120996	0.903694	0.506263	0.612672	0.0673137	0.946332
rs1439812	5490601	SLC40A1	1.80425	0.0711918	0.0121092	0.990338	0.507524	0.611787	-0.320664	0.748465	2.19712	0.0280121	1.71517	0.0863136	-0.494722	0.620796	0.728484	0.466317	0.905144	0.365389	1.7207	0.0853056
rs4149178	7050040	ZNF318	0.646057	0.518242	-0.568273	0.56985	-0.235519	0.813806	-0.217625	0.827722	0.586141	0.557781	0.451301	0.651773	0.0653296	0.947912	-0.501528	0.616	0.512939	0.607994	-0.107351	0.91451
rs1566843	4180612	UHMK1	0.628171	0.529892	0.140194	0.888507	-0.568886	0.569434	0.632635	0.526972	0.573206	0.566505	-1.38431	0.166263	2.72343	0.00646087	2.34635	0.0189582	2.32122	0.0202749	4.10014	4.12906e-05
rs202079	6510653	KATNAL1	-0.671523	0.501887	-0.21352	0.830921	0.883423	0.377008	0.207645	0.835507	-0.863439	0.387896	-1.3965	0.162563	-0.375977	0.706934	-0.729497	0.465698	-0.968089	0.333	-0.00827344	0.993399
rs2527866	5860315	DNAJB6	-0.96639	0.333849	1.1318	0.257718	0.056354	0.95506	3.75467	0.00017357	0.892001	0.372392	-0.849637	0.395527	-0.501442	0.61606	-0.224076	0.822698	0.266786	0.789634	-1.06801	0.285516
rs7426	240110	RABEP1;NUP88	0.440356	0.659679	4.70631	2.52246e-06	-1.64162	0.100668	4.55984	5.1192e-06	5.36566	8.06524e-08	2.77309	0.00555264	1.26564	0.205643	3.52448	0.000424319	2.79212	0.00523638	5.23816	1.62182e-07
rs870077	3450397	MTFR1;PDE7A	-0.48477	0.62784	-0.996294	0.319107	2.30591	0.0211154	-0.250348	0.802318	-0.616824	0.537351	-1.10199	0.270465	0.118809	0.905426	-0.0355453	0.971645	0.118701	0.905513	-0.339338	0.734355
rs4981443	7000692	MRPL52	-0.167966	0.86661	-0.499309	0.617562	-0.174645	0.861359	0.825191	0.409263	-0.184474	0.853642	-1.04287	0.297009	0.792048	0.428333	0.276355	0.782276	-0.0906431	0.927776	0.595842	0.551281
rs6769958	7550546	EOGT	0.147478	0.882754	1.93443	0.0530605	-3.12563	0.00177426	2.99526	0.00274209	2.31304	0.0207202	1.83323	0.0667688	0.283113	0.77709	1.05599	0.290972	0.725688	0.46803	1.11483	0.264924
rs3772501	510452	FHIT	0.955126	0.339514	-0.512883	0.608033	0.607118	0.543773	0.211243	0.832697	-0.518742	0.603941	0.26921	0.787768	-0.12282	0.902249	-1.06817	0.285442	-0.0705718	0.943739	-0.827572	0.407913
rs10829107	5130725	ABI1	-1.33142	0.183051	1.03234	0.301914	-0.0470772	0.962452	0.870909	0.383804	-0.73578	0.461865	-1.15763	0.247016	0.838165	0.401938	-0.6826	0.494859	0.176939	0.859556	0.868863	0.384922
rs730566	7320468	NCKIPSD	0.652252	0.514239	-0.704326	0.48123	0.0897304	0.928501	1.44072	0.149663	-0.0533379	0.957463	0.229014	0.818858	1.69959	0.0892088	-0.765776	0.44381	1.19256	0.233041	1.40106	0.161195
rs1781735	6770619	GLO1	-2.1859	0.0288232	1.94011	0.0523662	0.0385335	0.969262	0.923413	0.355792	1.90636	0.0566035	-0.214522	0.83014	0.552357	0.580704	0.638598	0.523085	1.52204	0.128	1.00382	0.315464
rs9901146	5390608	GSDMB	-0.698101	0.485114	1.08736	0.276877	-0.396868	0.691465	2.10221	0.0355347	1.7853	0.0742133	-0.350752	0.725775	4.94522	7.60582e-07	0.396243	0.691926	3.78309	0.000154891	3.86865	0.000109438
rs1803825	5360243	ITGB5	1.26746	0.20499	0.304501	0.760747	-0.303617	0.761419	-0.17978	0.857325	0.280289	0.779256	1.18846	0.234651	0.132359	0.8947	0.787794	0.430817	0.533491	0.593694	0.415927	0.677464
rs2830076	3370577	APP	1.2577	0.208499	-0.634115	0.526006	0.836172	0.403058	-0.362849	0.716717	-0.156118	0.87594	1.24993	0.211327	2.61497	0.00892366	2.06057	0.0393443	1.33381	0.182267	1.82461	0.0680606
rs4129267	6330754	UBE2Q1	-1.6541	0.0981066	1.35669	0.174879	-0.114346	0.908963	0.576915	0.563997	-0.190644	0.848805	-0.945052	0.344632	-1.7882	0.0737444	0.167726	0.866799	-1.70801	0.0876345	-2.44066	0.0146606
rs1216796	5700541	LRIG2	-1.40843	0.159005	-0.613828	0.539329	-0.264755	0.791198	-0.273898	0.784163	0.137026	0.89101	-0.728359	0.466394	0.0451188	0.964013	-1.33416	0.18215	-0.480875	0.630605	-1.46896	0.141844
rs4970941	4540288	C1orf56;CDC42SE1	0.521579	0.601963	-0.362805	0.71675	-0.306243	0.75942	0.27912	0.780152	1.29438	0.195534	0.107445	0.914436	2.01384	0.0440262	0.592716	0.553371	2.40588	0.0161335	2.77791	0.00547106
rs2289172	940753	RALB	2.9559	0.00311762	-1.73949	0.0819479	-0.236853	0.812771	1.16892	0.242438	-0.513915	0.607312	0.896387	0.370046	0.438986	0.660671	-0.13326	0.893988	-1.48541	0.137436	0.32094	0.748256
rs10159477	1660196	HK1	-0.573067	0.566599	0.974389	0.329864	0.218171	0.827296	0.286032	0.774854	1.26121	0.207234	0.414109	0.678794	0.938924	0.34777	-0.323239	0.746514	1.46558	0.142763	0.277032	0.781755
rs2413667	7000309	CYP2D7P1	2.76173	0.00574959	-0.0933986	0.925587	-0.794708	0.426784	-0.333282	0.738921	-2.09338	0.0363153	0.528868	0.596897	-1.30985	0.190248	0.724252	0.468911	-3.30719	0.000942371	-0.472651	0.636462
rs2325948	2120008	HOXB3;HOXB-AS3;HOXB4	0.269742	0.787359	-0.519949	0.603099	-1.54833	0.121543	-1.04413	0.296425	0.121914	0.902967	-0.0764845	0.939034	1.5284	0.126414	-0.653029	0.513737	1.29136	0.196578	-0.820799	0.411761
rs11230659	1450608	VWCE	-1.08135	0.279542	0.0459049	0.963386	0.136789	0.891198	0.263745	0.791976	-0.330216	0.741236	-1.08075	0.27981	1.06188	0.288288	-2.20763	0.0272703	1.04954	0.293929	0.0945921	0.924639
rs2545801	2360022	RAB24	0.631747	0.527552	0.398378	0.690352	-0.449201	0.653287	0.17931	0.857694	0.639801	0.522302	0.637915	0.523529	0.823724	0.410096	-0.225964	0.82123	0.548596	0.583283	1.18611	0.235578
rs9469220	7330392	PSMB9;TAP1;XXbac-BPG246D15.8	-0.0355451	0.971645	-1.27711	0.201564	1.52344	0.127648	-1.58955	0.111937	-0.413705	0.67909	-0.559298	0.575958	-0.0384842	0.969302	-1.54044	0.123452	0.40023	0.688987	-0.895689	0.370419
rs11984145	6580452	VPS41	1.00487	0.314962	1.71773	0.0858461	-1.62615	0.103917	1.58064	0.11396	1.87294	0.0610764	1.99728	0.0457945	-0.819874	0.412288	-1.47187	0.141056	1.64058	0.100885	1.27592	0.201983
rs13016512	4590349	ACVR2A	1.04666	0.295255	-0.657489	0.510866	-0.0285888	0.977193	-0.200557	0.841045	-0.398411	0.690327	1.10547	0.268957	1.06299	0.287789	0.185368	0.85294	0.586183	0.557752	-0.474592	0.635078
rs6745037	2680564	AC021016.6;C2orf62	0.562301	0.573911	1.3558	0.175163	0.281938	0.777991	-0.128395	0.897836	1.53691	0.124316	0.669995	0.502861	-1.49511	0.134885	0.991761	0.321314	0.184313	0.853768	0.564909	0.572136
rs10882042	6450324	2015-03-05	-0.260768	0.794272	0.963334	0.33538	-1.03601	0.300197	0.144142	0.885389	1.10099	0.2709	0.339613	0.734148	0.901483	0.367332	0.529638	0.596363	1.69418	0.0902302	-0.409883	0.681892
rs4467006	380379	KIAA1737;RP11-463C8.4;TMEM63C	-0.279612	0.779775	-0.849176	0.395784	1.47291	0.140775	-0.426027	0.670088	-0.740291	0.459123	0.0370049	0.970481	-0.809485	0.418236	-0.378648	0.704949	-0.73156	0.464437	-0.494959	0.620629
rs2302164	6400475	TMIGD2	-0.175838	0.860421	1.43656	0.150842	-1.91662	0.0552864	0.358378	0.72006	-0.370974	0.710657	-0.76757	0.442742	-0.713653	0.475442	0.338223	0.735195	-0.492579	0.62231	-1.50803	0.131548
rs381815	5490458	SNORD14A;RPS13	-0.0968118	0.922876	0.389065	0.697228	-0.367128	0.713523	2.20994	0.0271096	1.00298	0.315871	0.37184	0.710012	1.21123	0.225809	0.925346	0.354786	1.64915	0.0991174	0.943193	0.345582
rs1046934	3870112	TSEN15	1.34123	0.179847	0.405585	0.685048	0.933556	0.350533	0.33078	0.740811	0.548851	0.583108	1.26624	0.205427	-0.520912	0.602428	0.969586	0.332253	0.625958	0.531343	0.771294	0.440532
rs43038	7150167	PON2	-0.0832892	0.933622	2.2326	0.0255754	0.328201	0.742759	0.429832	0.667318	1.77672	0.0756143	1.19088	0.2337	-0.161006	0.872089	0.485382	0.627405	1.03171	0.302208	0.396483	0.691749
rs11239550	1780465	OR13A1	0.176445	0.859945	-0.301892	0.762734	0.187726	0.851091	-1.51136	0.130696	0.385104	0.70016	0.027649	0.977942	1.51065	0.130877	0.304621	0.760655	1.13909	0.254666	1.57188	0.11598
rs2992257	1820722	APBB1IP	0.571923	0.567374	1.6161	0.106073	-1.66597	0.0957186	0.981152	0.326518	0.428917	0.667984	1.40374	0.160395	-0.697211	0.485671	0.953823	0.340173	-0.389345	0.697021	-0.346983	0.728604
rs2480452	240138	RP11-247A12.7	-0.104549	0.916734	2.20612	0.0273754	-1.4374	0.150606	2.26465	0.0235344	1.15397	0.248511	0.632475	0.527077	0.334165	0.738255	0.778544	0.436249	0.150175	0.880627	0.236434	0.813096
rs2326679	2710446	CRLS1	0.609099	0.542459	1.02494	0.305392	-1.28118	0.200132	0.933366	0.350631	0.696519	0.486104	-0.377604	0.705725	-0.338795	0.734764	-0.495332	0.620366	-0.618192	0.536449	0.0470619	0.962464
rs3786870	1240730	SPINT2;CTB-102L5.4	1.05992	0.28918	-0.663595	0.506949	0.42331	0.672069	0.0193022	0.9846	0.752787	0.451578	-0.0564186	0.955008	-0.535497	0.592306	-0.65986	0.509344	-1.34608	0.178276	-0.212609	0.831632
rs11239550	2600634	2015-03-08	0.894218	0.371205	-2.04807	0.0405532	2.46542	0.0136851	-1.35402	0.17573	0.182001	0.855582	0.655867	0.51191	1.69479	0.0901161	2.02529	0.0428379	1.8268	0.0677292	2.48095	0.0131035
rs1044502	4730767	ANKRD9	1.13048	0.258274	-1.15064	0.249882	2.08583	0.0369936	0.129759	0.896757	-1.10008	0.271297	1.28232	0.199729	-0.510457	0.609731	-0.0697442	0.944397	-1.29133	0.19659	-1.13208	0.257601
rs1003719	290343	TTC3	0.29093	0.771104	-0.545077	0.585701	0.335803	0.737019	1.08831	0.276457	-0.724313	0.468873	0.979351	0.327406	-0.205061	0.837525	-0.486208	0.626819	-0.733624	0.463178	0.173824	0.862004
rs4760	360475	PLAUR	-0.357576	0.720661	-0.470616	0.637915	0.104929	0.916432	-1.12496	0.260605	-0.188691	0.850335	-0.658417	0.51027	0.98526	0.324496	0.62275	0.533449	0.187409	0.85134	0.157033	0.875219
rs10492904	1660528	CKLF;CKLF-CMTM1	0.0141373	0.98872	-2.51047	0.0120571	1.29873	0.194036	-1.84867	0.0645056	-0.228835	0.818997	-1.1292	0.258812	2.43215	0.0150093	1.00312	0.315803	2.18781	0.0286833	1.73286	0.0831203
rs6869388	1070736	ANKRD32	-1.56109	0.118502	-0.223163	0.823408	-0.597923	0.549891	0.119562	0.90483	-0.250477	0.802218	-1.57423	0.115435	0.919924	0.357612	-0.257427	0.796849	1.32793	0.184201	-1.078	0.281034
rs10514609	2630523	-	1.78406	0.0744134	-1.47297	0.140759	0.859123	0.390273	-0.369556	0.711713	-1.32947	0.183692	0.487612	0.625825	2.22718	0.0259353	-1.18774	0.234936	0.32071	0.74843	1.07976	0.280249
rs12886471	5360612	-	-0.577379	0.563683	2.34681	0.0189347	-2.61931	0.00881075	3.97601	7.00823e-05	2.12704	0.0334169	-0.533873	0.593429	-1.02973	0.303138	0.664206	0.506559	-0.1539	0.877689	1.69655	0.089782
rs12190684	160333	SLC18B1	0.110148	0.912292	2.53425	0.011269	-1.11586	0.264482	2.74455	0.00605946	2.73113	0.00631168	2.07593	0.0379006	0.314091	0.753452	0.757874	0.448526	0.856013	0.39199	0.652077	0.514352
rs2502731	1170019	C9orf16	-1.9482	0.0513913	-0.401635	0.687953	0.411038	0.681044	-0.230125	0.817995	-0.117344	0.906588	-1.78238	0.0746874	-1.18264	0.236951	0.253398	0.799961	-0.364543	0.715453	-2.21889	0.0264945
rs2241423	6760703	MAP2K5	0.124486	0.900931	-0.201817	0.840059	-0.582017	0.560555	-0.116785	0.90703	-0.401388	0.688134	-0.38555	0.69983	0.137912	0.89031	1.16641	0.243448	-0.0748863	0.940305	-0.582517	0.560218
rs4477263	6270554	RP11-385F5.4;LGALS8;HEATR1	2.25011	0.024442	-0.319351	0.74946	0.0644607	0.948603	-0.671424	0.501951	0.694483	0.487379	1.73544	0.0826622	0.491157	0.623315	0.724636	0.468676	0.679511	0.496814	0.829058	0.407072
rs12056143	1580400	TTC26	1.61321	0.106698	0.62093	0.534646	-0.126948	0.898981	0.903826	0.366088	1.07923	0.280483	1.95357	0.0507518	1.41793	0.156211	0.188647	0.850369	1.61284	0.106778	2.49175	0.0127117
rs6584526	150678	WBP1L	0.203444	0.838788	1.64915	0.0991174	-0.116787	0.907029	1.18878	0.234527	1.47563	0.140044	0.149918	0.88083	-1.66929	0.0950603	-0.16841	0.866261	-1.04736	0.294935	-0.98768	0.32331
rs11076933	4920162	FLYWCH2	1.60351	0.108822	0.442783	0.657923	-0.478428	0.632346	-1.28031	0.200435	-1.18704	0.235211	-0.343901	0.730921	-2.38309	0.017168	1.15931	0.246329	-2.398	0.016485	-0.719308	0.471951
rs13277113	4010184	C8orf12;FAM167A	-2.55039	0.0107603	4.43254	9.3129e-06	-3.70589	0.000210646	7.75994	8.49716e-15	3.60385	0.000313532	-1.64791	0.0993715	1.34742	0.177844	-0.332335	0.739636	3.18104	0.00146746	1.88434	0.0595196
rs12890068	1340397	KCNH5	-0.682671	0.494815	-0.669169	0.503388	0.294815	0.768135	-0.790589	0.429184	-1.07417	0.282746	-1.11781	0.263648	-0.105489	0.915988	0.799485	0.424009	-1.11917	0.263066	-1.38405	0.166342
rs6693602	1240739	LEPRE1	-0.189176	0.849955	1.18408	0.23638	-1.68882	0.0912541	1.43954	0.149998	1.83371	0.0666972	0.313322	0.754036	0.582495	0.560233	-0.00510632	0.995926	0.844934	0.398148	1.3448	0.178689
rs2290202	6250605	RCCD1	-0.25233	0.800786	3.2319	0.0012297	-3.07972	0.00207197	3.42409	0.000616855	3.83886	0.000123606	1.66415	0.0960832	1.35058	0.176832	0.230704	0.817545	2.71577	0.00661222	1.35941	0.174016
rs2293579	6940768	MYBPC3	1.55718	0.119427	-0.87642	0.380802	2.1094	0.0349098	-1.49738	0.134295	-1.85061	0.0642261	-0.0960524	0.923479	-0.132397	0.89467	-1.03718	0.299654	-0.862662	0.388323	-0.997951	0.318303
rs8100241	2710431	GTPBP3	0.483997	0.628388	-1.57822	0.114516	0.66116	0.508509	1.51433	0.129941	0.170598	0.86454	-0.334727	0.737831	1.0026	0.316053	-0.0992824	0.920914	0.626364	0.531076	1.01405	0.310557
rs1982151	1990433	RMI1	1.21437	0.224606	-0.139347	0.889176	1.02848	0.303725	0.879188	0.379299	0.920767	0.357172	1.98833	0.0467749	1.36506	0.172233	1.01	0.312494	2.53191	0.0113443	2.16611	0.0303028
rs10812614	510347	C9orf72	2.2372	0.0252733	0.529818	0.596238	-0.701235	0.483156	0.913586	0.360934	2.19779	0.027964	3.14234	0.00167602	-1.13801	0.255115	3.35362	0.000797606	-0.780079	0.435344	0.239034	0.81108
rs2251674	6330202	-	1.78346	0.0745121	-0.392671	0.694562	1.27016	0.204029	-0.807314	0.419486	-0.523944	0.600318	0.116777	0.907037	-0.448956	0.653464	0.641466	0.52122	-1.25772	0.208491	0.488831	0.624961
rs11964892	2000553	-	3.84863	0.000118781	1.28917	0.197341	-0.437975	0.661405	1.01832	0.308525	3.29021	0.00100113	4.8536	1.21241e-06	0.64069	0.521724	2.82354	0.00474972	0.930233	0.352251	3.29564	0.000981976
rs10925482	1030360	GGPS1	-1.21269	0.225247	0.614971	0.538574	-1.78806	0.0737656	0.313195	0.754133	-0.351984	0.72485	-1.16076	0.245741	-0.87481	0.381677	-0.193843	0.846299	0.256882	0.79727	-0.334847	0.73774
rs6861681	1500131	CPEB4	4.58735	4.48916e-06	-1.87951	0.0601754	4.52181	6.13129e-06	0.286784	0.774278	3.50771	0.000451975	3.3186	0.000904691	7.77838	7.34603e-15	2.9312	0.00337653	5.55774	2.73288e-08	10.9852	4.50237e-28
rs7209435	3940494	LIMD2	0.924524	0.355214	-1.12317	0.261367	1.00971	0.312636	-1.39221	0.16386	-0.270962	0.78642	-0.187524	0.85125	1.89857	0.0576207	-0.597918	0.549895	0.282163	0.777818	0.197951	0.843083
rs11199436	1820427	-	-1.12755	0.259508	1.16803	0.242796	-1.48601	0.137278	0.0828252	0.933991	0.622097	0.533878	-0.506748	0.612332	-1.89335	0.0583108	-0.257062	0.797131	-1.27921	0.200824	-0.797624	0.425089
rs6499165	1510630	RP11-67A1.2;DUS2L	-1.34672	0.178071	-1.90117	0.0572792	0.90069	0.367753	-0.576881	0.56402	-0.644694	0.519125	-0.969687	0.332202	1.17772	0.238909	-0.737314	0.460932	0.453653	0.650078	-0.0173153	0.986185
rs2647012	3940477	TAP2	3.16221	0.00156576	0.300362	0.763901	-0.0124587	0.99006	-0.149592	0.881086	1.1435	0.25283	3.21666	0.00129693	0.472299	0.636713	2.15827	0.0309067	0.063787	0.94914	0.485436	0.627367
rs8099984	3800037	ZNF543	0.227696	0.819883	0.605395	0.544917	-0.10197	0.91878	-0.0194963	0.984445	2.03836	0.0415143	0.280855	0.778822	0.890311	0.373299	0.15006	0.880717	1.38333	0.166564	0.423681	0.671799
rs11185547	4830014	RNF168	2.2143	0.0268084	1.83966	0.0658183	0.0932543	0.925702	2.00517	0.0449452	3.44945	0.000561735	3.55537	0.000377442	-0.622512	0.533605	3.03072	0.00243968	1.66258	0.0963966	3.14722	0.00164834
rs1047743	3520278	GALK1	1.47656	0.139792	-0.267347	0.789202	1.12209	0.261823	1.11986	0.262772	-0.14917	0.88142	0.921977	0.356541	-0.439431	0.66035	0.343516	0.731211	-1.2991	0.19391	-0.0120796	0.990362
rs2524005	6040187	HLA-V;HCG4	-0.0657716	0.94756	1.84437	0.0651298	-1.07273	0.283393	1.61598	0.106098	1.29028	0.196954	0.618729	0.536095	-0.539212	0.589741	0.669736	0.503026	0.53751	0.590915	1.00328	0.315725
rs2288464	4880288	ABHD8	-1.68899	0.091222	-0.118363	0.90578	-0.33239	0.739595	0.356425	0.721522	-1.32682	0.18457	-1.13431	0.256663	1.6895	0.0911237	-0.652888	0.513829	-0.357164	0.720969	-0.76701	0.443076
rs6899976	3440605	L3MBTL3;RP11-73O6.4	0.00768906	0.993865	-0.917316	0.358977	0.651994	0.514405	0.055212	0.95597	-0.335585	0.737184	-0.363848	0.715972	1.82989	0.0672661	0.118003	0.906065	0.66303	0.507312	1.60201	0.109153
rs7125978	1660020	ARHGEF17	0.77166	0.440316	-0.475789	0.634224	0.00193278	0.998458	-0.0537424	0.95714	0.771274	0.440545	0.394056	0.69354	1.35374	0.175818	-1.38634	0.165642	1.06473	0.286999	0.0193039	0.984599
rs1799852	4480224	SRPRB	0.754955	0.450276	0.0995158	0.920729	-1.03999	0.298346	1.08361	0.278538	-0.790235	0.42939	0.056373	0.955045	-0.905195	0.365362	0.714833	0.474712	-2.01864	0.0435242	-1.22673	0.219923
rs4705952	7050180	SLC22A5	-1.92204	0.0546008	0.63716	0.52402	-0.295216	0.767829	0.205378	0.837277	0.473812	0.635634	-1.13184	0.257702	1.76065	0.0782974	-0.447332	0.654636	2.64484	0.00817299	-0.332307	0.739657
rs9365097	5900240	MRPL18	-0.13773	0.890454	-0.360985	0.718111	0.787915	0.430746	-0.772026	0.440099	1.35941	0.174016	0.930652	0.352034	1.67974	0.0930081	-0.370146	0.711274	2.16088	0.0307043	0.982059	0.326071
rs4731386	3310484	SND1	2.47854	0.013192	1.04895	0.294203	-0.930762	0.351977	0.509881	0.610135	3.2302	0.00123705	2.69756	0.00698503	0.0802498	0.936039	-0.412997	0.679609	2.11789	0.0341846	2.33696	0.0194412
rs4958881	450671	ANXA6	-2.30707	0.021051	2.20375	0.0275421	-0.937146	0.348684	0.47742	0.633063	1.3671	0.171592	-1.23028	0.218591	-0.464313	0.642424	-1.08061	0.279869	0.633902	0.526145	-0.943769	0.345288
rs17089028	2140154	CYB5A	-0.269601	0.787467	-3.73668	0.000186469	3.34523	0.000822151	-3.32612	0.000880655	-2.42034	0.0155062	-1.60781	0.107878	1.52898	0.12627	0.109149	0.913084	-1.07407	0.282789	0.00801727	0.993603
rs11128886	3130669	TBC1D5;SATB1	-1.05703	0.2905	-0.438698	0.66088	0.561637	0.574363	-1.9518	0.0509624	-0.755145	0.450162	-1.81396	0.0696845	1.23736	0.215953	-1.81971	0.0688027	1.15071	0.249852	-0.7622	0.445941
rs360684	2320575	TSPAN2	1.33221	0.18279	-0.68858	0.491088	2.09729	0.0359678	-1.32157	0.186311	0.905513	0.365194	0.532717	0.594229	0.474306	0.635282	0.278653	0.780511	1.50369	0.13266	2.27573	0.0228624
rs13035710	60433	-	1.0234	0.306117	-0.863693	0.387757	-1.23632	0.216341	1.2333	0.217465	-0.224647	0.822254	0.0725445	0.942169	1.58378	0.113244	-0.484823	0.627802	0.825754	0.408943	0.800111	0.423647
rs11658329	6450594	CD79B	-0.654405	0.512851	1.31149	0.189692	-1.81623	0.0693344	0.765208	0.444148	0.159697	0.87312	-0.611181	0.54108	-0.405361	0.685212	0.421236	0.673583	-0.169163	0.865668	-0.176224	0.860118
rs4499972	5090750	FOXC1	1.50732	0.131728	-0.632455	0.52709	-0.583171	0.559778	-0.601516	0.547496	0.266084	0.790175	0.934204	0.350199	0.439781	0.660096	-0.37666	0.706426	-0.896146	0.370175	1.89855	0.0576243
rs7955412	10392	LRRC23	-0.131927	0.895042	1.81627	0.0693284	-1.2057	0.227934	2.51156	0.0120199	1.2579	0.208427	0.304024	0.761109	-1.0841	0.278322	-0.454927	0.649162	0.289791	0.771976	0.954525	0.339818
rs886424	3780181	FLOT1	1.25442	0.209691	0.16777	0.866764	-0.295142	0.767885	0.506401	0.612575	1.9126	0.0557998	1.62948	0.103212	0.860391	0.389573	1.04904	0.294162	1.33051	0.183349	3.07182	0.0021276
rs2459210	2230091	LHPP	0.511742	0.608831	-1.44902	0.147333	1.25312	0.210161	-1.19076	0.233747	0.595418	0.551564	0.347932	0.727891	2.48136	0.0130881	0.195886	0.8447	1.9419	0.0521497	0.909702	0.36298
rs7513934	730497	CC2D1B	0.461727	0.644277	0.0176187	0.985943	-0.476027	0.634055	0.266345	0.789974	0.853648	0.3933	-0.771814	0.440225	0.278136	0.780908	-0.431749	0.665924	1.08304	0.278792	0.15882	0.873811
rs11983987	1230754	POR	-0.58595	0.557909	-0.0189125	0.984911	-0.363123	0.716513	-0.7663	0.443498	-0.370176	0.711252	0.119913	0.904552	1.81453	0.0695961	-1.23533	0.21671	1.29159	0.196499	1.44417	0.148692
rs365339	1450397	HSD17B8	-0.082225	0.934468	0.873166	0.382573	-1.19354	0.232659	0.576307	0.564407	0.631371	0.527798	-1.09677	0.272744	-0.127176	0.898801	0.794385	0.426971	0.316254	0.75181	1.11043	0.266814
rs499188	130670	ZDHHC5	1.26947	0.204272	-1.38329	0.166576	1.04317	0.29687	-0.103106	0.917879	0.770143	0.441215	0.878098	0.37989	1.90448	0.0568483	-0.103758	0.917361	1.47389	0.14051	1.90185	0.0571907
rs4808667	7380279	GLT25D1	1.21166	0.225644	1.79579	0.0725282	0.230461	0.817734	0.239231	0.810926	3.17109	0.00151869	1.69303	0.0904495	1.18129	0.237487	3.15051	0.00162985	2.02711	0.0426511	4.04488	5.23506e-05
rs594143	2850468	-	-0.582352	0.56033	1.41098	0.158251	-1.59168	0.111456	2.9599	0.00307741	2.33787	0.0193939	0.62255	0.533581	0.0919286	0.926755	0.0306116	0.975579	2.54765	0.0108451	2.14716	0.0317805
rs2241590	620615	NDUFA7	-1.05185	0.292867	0.244619	0.806751	-0.901222	0.36747	-1.01003	0.312479	-1.36657	0.17176	-1.47015	0.14152	-1.76436	0.0776715	-1.02934	0.303319	-2.72221	0.00648466	-1.97055	0.0487753
rs4539273	7650091	FNBP4	-1.10447	0.269387	1.45293	0.146243	-1.67806	0.0933353	2.25989	0.0238284	1.17369	0.240519	-0.074639	0.940502	-0.996172	0.319166	0.626442	0.531025	0.648539	0.516637	0.167336	0.867106
rs10758312	5220414	TMEM8B;FAM221B	0.503264	0.614779	-0.687471	0.491786	-0.901069	0.367552	-1.5579	0.119257	0.727027	0.467209	-0.405904	0.684814	0.888568	0.374235	1.17708	0.239162	0.893843	0.371406	0.166668	0.867632
rs6539267	4780253	POLR3B;RP11-144F15.1	1.90779	0.0564187	-0.351401	0.725288	0.41789	0.676028	-0.852452	0.393963	-0.0661036	0.947295	1.41304	0.157645	-0.0445662	0.964453	1.32413	0.185459	-1.56468	0.117657	0.982657	0.325776
rs1053183	2470743	KMO;OPN3	0.0399758	0.968112	0.685652	0.492933	-1.55828	0.119168	1.95926	0.0500821	1.48967	0.136311	-0.231752	0.816731	-0.190236	0.849124	0.854124	0.393036	1.74648	0.0807272	0.440711	0.659422
rs8038619	3460296	TM6SF1;HDGFRP3	0.787477	0.431002	1.19485	0.232144	-2.39943	0.0164204	1.07587	0.281987	2.75189	0.00592522	0.852288	0.394054	2.10191	0.0355608	0.997684	0.318433	2.9513	0.00316444	1.65079	0.0987813
rs6466574	2630577	CAV2	1.00728	0.313802	-0.985504	0.324377	2.4214	0.015461	0.265257	0.790811	0.732215	0.464037	0.327037	0.74364	-0.0901058	0.928203	-0.194984	0.845405	-0.46858	0.63937	3.49851	0.00046787
rs7965777	2360376	SLC24A6	-1.06448	0.28711	0.549133	0.582914	0.113255	0.909828	-0.215065	0.829716	0.106546	0.915149	0.0930825	0.925838	0.618169	0.536464	0.77571	0.43792	0.61367	0.539433	1.61313	0.106715
rs317689	3370747	YEATS4	0.5523	0.580743	0.309908	0.756631	0.0400794	0.96803	0.138316	0.88999	1.03486	0.300735	1.27377	0.202745	1.88123	0.0599403	-0.402744	0.687136	2.28534	0.022293	1.88252	0.0597657
rs435216	6840491	CREBRF	0.843822	0.398769	2.27456	0.0229323	-1.57604	0.115016	1.78159	0.0748155	2.72358	0.00645788	2.5738	0.0100589	-1.34315	0.179224	0.936797	0.348863	-0.615659	0.538119	-0.565062	0.572032
rs1048020	1010288	CDC37L1	-0.00395525	0.996844	1.15957	0.246226	1.19374	0.232579	0.322537	0.747046	3.02826	0.00245965	0.628598	0.529612	1.2902	0.196982	0.772593	0.439763	2.83391	0.00459823	3.99139	6.56864e-05
rs12263532	2070209	BTAF1	-1.1817	0.237325	-0.909139	0.363277	0.170783	0.864394	-0.293212	0.76936	0.215785	0.829155	-1.84538	0.0649818	1.59094	0.111623	-0.206243	0.836601	0.912668	0.361417	-0.349169	0.726962
rs1618689	5420132	CAMK4	-1.45767	0.144931	-0.918392	0.358414	1.68614	0.091769	0.0110529	0.991181	-1.18593	0.235651	-1.06741	0.285789	1.31907	0.187145	-0.724973	0.468469	0.136805	0.891185	-0.67384	0.500413
rs3761847	4570768	TRAF1	-2.96838	0.00299371	1.15012	0.250093	-0.262648	0.792822	1.24692	0.212426	0.213279	0.831109	-1.8767	0.0605592	1.98621	0.0470099	-0.998677	0.317951	1.93666	0.0527872	-0.675877	0.499119
rs6860077	380189	APBB3;SLC35A4	-0.683839	0.494077	-1.11702	0.263986	0.706315	0.479992	-0.275545	0.782898	-0.600738	0.548014	-0.706968	0.479586	1.50008	0.133593	3.16094	0.00157261	0.279639	0.779754	0.418045	0.675915
rs494453	5260008	FAM212B	-0.920593	0.357263	-0.552635	0.580513	1.04995	0.293739	-1.60621	0.108228	-0.629184	0.529228	-0.909214	0.363237	-0.21573	0.829198	-1.41587	0.156814	0.284748	0.775837	0.731689	0.464358
rs11642006	7160292	RP11-529K1.4;ST3GAL2	-1.88465	0.0594771	-0.322892	0.746777	-0.0977766	0.92211	0.0938835	0.925202	-0.958847	0.337636	-1.20392	0.22862	-0.513082	0.607894	0.0986395	0.921424	-0.231861	0.816646	-0.330978	0.740661
rs733175	3930546	SLC2A9	0.407705	0.68349	0.745121	0.456199	-1.76729	0.0771801	-0.618581	0.536193	0.528675	0.597031	-0.0421547	0.966375	-0.0369546	0.970521	-0.178583	0.858265	-0.900965	0.367607	0.0865345	0.931042
rs1715421	6940379	MPZL2	0.15752	0.874835	-1.62918	0.103276	1.04714	0.295035	0.760079	0.447207	-0.393973	0.693601	0.939202	0.347627	1.38411	0.166324	-0.790309	0.429347	1.09611	0.273029	0.772787	0.439649
rs617948	6520364	C2CD2L	0.849949	0.395353	-0.972873	0.330617	-0.238932	0.811158	0.102141	0.918645	0.568322	0.569816	0.509248	0.610578	1.80253	0.0714625	1.25324	0.210118	1.20026	0.230037	1.27364	0.202789
rs12819414	3170102	C12orf49	-0.955303	0.339425	1.383	0.166666	-1.28397	0.199154	1.65472	0.0979822	1.63666	0.101701	0.499915	0.617135	0.830351	0.40634	-0.314211	0.753361	1.23611	0.216418	0.291649	0.770555
rs3752689	770021	AC009948.5;PRKRA	-1.65736	0.0974474	0.881426	0.378087	-2.11569	0.0343711	1.17278	0.240882	0.553829	0.579696	-0.507562	0.611761	-0.486382	0.626697	-1.18792	0.234866	0.355332	0.722341	-1.99316	0.0462437
rs12282	830168	RP11-46H11.10;CHFR	-0.087489	0.930283	1.10196	0.270477	-0.22901	0.818861	0.74008	0.459251	0.325804	0.744573	-0.0268246	0.9786	-1.65956	0.0970027	1.50923	0.13124	-0.454635	0.649372	0.48085	0.630623
rs11733269	2750471	RP11-792D21.2	0.209001	0.834447	0.0490764	0.960858	-0.396565	0.691688	-0.865575	0.386724	1.15019	0.250066	0.548015	0.583681	0.282326	0.777693	-0.863574	0.387822	1.65858	0.0972005	-0.670294	0.50267
rs3769124	1820347	ASB1	-0.441842	0.658603	0.107036	0.914761	-1.10416	0.269523	-0.139909	0.888732	0.108938	0.913251	-0.966825	0.333632	1.24336	0.213734	0.483796	0.628531	0.348367	0.727565	0.417253	0.676493
rs11879191	730554	CTD-2369P2.8;ICAM4	0.12756	0.898497	0.328116	0.742824	-1.46662	0.14248	0.0806546	0.935717	0.398385	0.690347	0.22865	0.819141	-0.45675	0.647851	0.422049	0.67299	-0.184442	0.853667	-0.189595	0.849627
rs7443182	1170630	ANKRA2	2.59318	0.00950934	3.24287	0.00118333	-2.41903	0.0155618	2.37364	0.0176139	1.17749	0.238998	2.43715	0.0148034	-7.80532	5.93518e-15	3.24062	0.0011927	-6.14279	8.10825e-10	-1.54221	0.123022
rs2695284	2630687	CHPT1	-0.0915494	0.927056	2.59256	0.00952643	0.0731969	0.941649	1.23125	0.21823	3.81567	0.000135814	1.25571	0.209222	-0.0338115	0.973027	-0.351072	0.725534	1.41215	0.157904	1.28281	0.199559
rs800140	6960424	C11orf21;TSPAN32	-0.675816	0.499157	-0.337751	0.735551	0.00692941	0.994471	0.0102732	0.991803	-1.37986	0.167631	-1.86316	0.0624391	0.972233	0.330934	-1.36424	0.172491	-0.390407	0.696236	0.143617	0.885803
rs4801949	360709	-	0.0309275	0.975327	-1.14481	0.252289	-0.775035	0.438319	-0.27207	0.785569	0.549086	0.582947	-0.356914	0.721156	2.93212	0.00336652	0.584004	0.559218	2.62498	0.00866533	1.78307	0.0745753
rs759071	3890167	AC006538.4;SLC39A3	2.27712	0.0227788	0.267778	0.78887	-0.469661	0.638597	0.669762	0.50301	0.925441	0.354737	2.33429	0.0195805	0.031958	0.974506	3.38483	0.000712219	0.893609	0.371531	2.28701	0.0221952
rs12729998	7320703	-	-1.39241	0.163799	-0.423536	0.671904	-2.97044	0.00297378	1.22532	0.220455	3.50998	0.00044814	-0.692028	0.48892	2.28549	0.0222839	0.184524	0.853602	4.88214	1.04943e-06	0.532847	0.594139
rs11032839	6060634	-	-0.522284	0.601473	0.184081	0.85395	-0.204534	0.837936	-0.0221501	0.982328	0.165415	0.868618	-1.00564	0.314588	0.906933	0.364442	0.930853	0.351929	0.559046	0.57613	-0.0452419	0.963914
rs790142	6110603	RP11-632F7.3;APBB2	1.15696	0.247289	-0.126106	0.899648	-0.846083	0.397506	-1.09685	0.272708	-0.126407	0.899409	0.749022	0.453844	1.60202	0.109152	0.925847	0.354526	1.22238	0.221564	1.72924	0.0837657
rs2731672	3610735	F12	0.393545	0.693917	-0.973113	0.330497	1.20924	0.22657	-2.17819	0.0293921	-0.905437	0.365234	-0.298597	0.765248	0.833027	0.40483	-0.0366729	0.970746	-0.290682	0.771294	-0.912937	0.361276
rs8137	2320594	-	-0.936919	0.3488	1.43925	0.15008	-0.614184	0.539094	1.2328	0.217651	1.22113	0.222037	-1.10502	0.269152	-0.631533	0.527692	0.349334	0.726839	0.694798	0.487182	0.687468	0.491788
rs757978	5960703	2015-09-02	1.75809	0.0787317	1.73733	0.0823284	-0.922775	0.356124	0.715567	0.474258	1.42401	0.154444	1.60306	0.108922	0.826517	0.408511	0.489982	0.624146	0.0270499	0.97842	3.69176	0.000222704
rs6987474	6180022	PCM1	0.526076	0.598835	1.62672	0.103796	0.0318768	0.97457	1.25918	0.207965	0.442999	0.657767	2.23281	0.0255617	1.03601	0.300196	-0.654213	0.512974	2.4739	0.0133646	1.72316	0.084859
rs2187668	6450692	PSMB9	1.50203	0.133088	-0.316784	0.751408	-0.284135	0.776307	-0.863541	0.38784	-1.09922	0.271671	-0.0637763	0.949148	-0.175246	0.860886	1.53685	0.124329	-1.25393	0.209868	0.119255	0.905073
rs3800494	6180414	PTP4A1	0.402269	0.687486	1.18674	0.235328	-0.765506	0.443971	2.54718	0.0108599	3.26012	0.00111367	0.810934	0.417403	0.491689	0.622939	1.87188	0.0612225	3.19085	0.00141854	2.18726	0.0287237
rs3741324	5490379	TMEM25;IFT46	1.01688	0.309209	-0.121996	0.902902	-0.463823	0.642774	-0.616865	0.537324	1.81617	0.0693451	1.38259	0.166789	0.505658	0.613097	2.09096	0.0365321	1.23969	0.215089	2.17838	0.0293781
rs6728431	2510201	ESPNL	-0.564583	0.572358	-0.706378	0.479953	-0.676837	0.49851	1.4229	0.154766	0.280478	0.779111	-0.373783	0.708566	0.833263	0.404697	-1.51012	0.131013	1.02009	0.307687	0.532816	0.594161
rs9446917	5130605	MTO1	1.092	0.274835	-0.615789	0.538034	0.799316	0.424107	1.02432	0.305685	0.233731	0.815194	0.578641	0.562831	0.134915	0.892679	-0.0509268	0.959384	0.821194	0.411536	2.51354	0.0119526
rs1128585	2120544	IMP3	-0.0773248	0.938365	-0.714765	0.474754	0.921875	0.356594	-0.914435	0.360488	-0.410993	0.681077	-0.472014	0.636917	0.052276	0.958309	-0.469176	0.638944	-0.66268	0.507535	1.25975	0.207758
rs2120461	1230347	RERE	1.78226	0.0747066	-0.441693	0.658711	0.782602	0.433861	0.129192	0.897206	0.760527	0.446939	1.03559	0.300394	0.764809	0.444385	0.864864	0.387113	1.11788	0.263617	0.798	0.424871
rs9857669	5220661	LZTFL1;CCR9	-0.493668	0.621541	1.65509	0.0979068	-1.61893	0.105463	0.435379	0.663288	1.51356	0.130139	0.856185	0.391896	0.405455	0.685143	1.17669	0.23932	1.56256	0.118155	1.49332	0.135355
rs10829026	3440520	-	1.28285	0.199545	0.114632	0.908737	0.16954	0.865372	0.0230001	0.98165	1.31255	0.189334	1.33297	0.182542	-0.560531	0.575117	0.154835	0.876951	0.363483	0.716244	1.60761	0.10792
rs1625099	1780133	TMTC4	0.316306	0.75177	1.04173	0.297537	-0.90965	0.363007	2.18844	0.0286375	0.86752	0.385657	1.00017	0.317228	0.600395	0.548243	1.61505	0.106299	-0.16747	0.867	1.09298	0.274404
rs6006613	2140221	SAMM50;PARVB	0.946096	0.3441	0.756922	0.449096	-0.219937	0.82592	-0.0300119	0.976058	0.723871	0.469145	1.25476	0.209566	-1.08206	0.279224	-0.236117	0.813342	-0.00745086	0.994055	0.16682	0.867511
rs153821	4730154	-	0.786983	0.431292	1.99788	0.0457299	-1.02451	0.305595	1.92114	0.0547143	1.36371	0.172659	1.31226	0.189431	-2.71063	0.00671556	1.04891	0.294221	-1.39501	0.163012	-1.85952	0.0629538
rs2221593	5900253	BATF3	-0.743342	0.457275	-0.34971	0.726556	0.290289	0.771595	-1.12338	0.261278	0.0184197	0.985304	-0.41108	0.681014	0.754665	0.45045	0.817991	0.413363	1.20919	0.226592	0.253868	0.799598
rs2529440	3780056	-	2.67287	0.0075205	1.99144	0.0464322	-1.02397	0.305851	0.89717	0.369628	1.53717	0.124251	2.34398	0.0190793	-4.03395	5.48467e-05	1.55353	0.120297	-2.76879	0.00562648	-0.209155	0.834327
rs2303565	7040735	CYP27A1	2.60033	0.00931335	2.38629	0.0170192	-0.456387	0.648112	2.54507	0.0109255	2.45092	0.0142491	2.11545	0.0343917	1.07197	0.283734	2.09455	0.0362106	0.723518	0.469362	3.933	8.38911e-05
rs2160140	1740451	IL1R2	2.38137	0.0172484	0.738325	0.460317	-0.144634	0.885	0.220327	0.825616	0.23158	0.816864	1.4393	0.150065	-0.930511	0.352107	1.86055	0.0628077	-1.41856	0.156027	0.589722	0.555377
rs3820028	5340338	E2F2	-0.961825	0.336138	-0.470997	0.637643	1.6033	0.108867	0.663379	0.507088	0.0986142	0.921445	-0.570873	0.568085	-0.288165	0.773221	-1.88744	0.0591016	0.0192882	0.984611	-0.39555	0.692437
rs3124314	6100010	THEM4	-0.00997979	0.992037	1.46106	0.144	-1.21054	0.226071	1.03014	0.302943	-0.363826	0.715988	1.06741	0.285785	0.831433	0.405729	1.42041	0.155489	-0.273155	0.784734	0.0861638	0.931336
rs1188633	630397	KIAA0319L	-0.0377206	0.96991	0.758865	0.447933	-1.4048	0.160079	-0.0335409	0.973243	1.64054	0.100892	1.46814	0.142067	0.370754	0.710821	-0.426871	0.669473	1.73702	0.0823829	0.0225008	0.982048
rs2114443	1300075	PCTP	-0.915959	0.359688	-0.243715	0.807452	-1.43024	0.152648	-0.0539942	0.95694	-0.654104	0.513045	-0.141254	0.887669	0.310961	0.755831	-1.27065	0.203855	-0.0975046	0.922326	-0.643835	0.519682
rs7429875	620543	SLC4A7	0.683702	0.494163	1.02271	0.306444	-1.01756	0.308888	0.0931481	0.925786	1.36521	0.172187	1.22728	0.219718	-0.625655	0.531541	0.875518	0.381292	0.789441	0.429854	0.59776	0.55
rs1962004	3830047	LRRC61	-1.10444	0.269404	-0.410094	0.681737	-0.755236	0.450107	0.411015	0.681061	-1.59342	0.111065	-2.32736	0.0199459	0.919125	0.35803	-0.0734843	0.941421	-0.590822	0.55464	-1.9294	0.0536817
rs13237006	50332	MDFIC	0.95076	0.341726	0.92585	0.354524	-1.30375	0.192319	1.38256	0.166801	-0.0575841	0.95408	0.627401	0.530397	-1.18363	0.236561	0.160323	0.872627	-1.58622	0.112689	-0.188487	0.850495
rs10764686	580470	MASTL	-0.866759	0.386074	1.47316	0.140709	-1.9356	0.0529171	3.21991	0.00128231	2.93243	0.00336316	1.07998	0.280152	1.42441	0.154327	0.232023	0.81652	3.09737	0.00195248	1.98983	0.0466097
rs6532114	6270553	ART3;CXCL10	0.678929	0.497183	0.0156357	0.987525	-0.234074	0.814927	-0.4109	0.681146	-0.498733	0.617968	-0.148028	0.882321	-0.0660972	0.9473	1.19245	0.233083	0.251877	0.801136	1.06674	0.286089
rs9806945	4900333	HAGH	0.232936	0.815811	-0.969871	0.332111	2.98487	0.00283703	0.710881	0.477158	0.562222	0.573964	-0.176123	0.860198	1.2868	0.198165	-0.747392	0.454827	1.17021	0.241915	1.61792	0.105679
rs2830076	650110	APP	0.535517	0.592292	-0.885551	0.37586	0.847771	0.396566	-0.869605	0.384516	-0.00437526	0.996509	0.924009	0.355482	2.75705	0.00583251	1.15977	0.246144	1.54971	0.121211	1.59215	0.11135
rs4362766	3140543	ZMAT3	-0.132005	0.894981	3.12521	0.00177677	-0.819502	0.4125	2.83514	0.00458061	1.00556	0.314626	0.783263	0.433473	-3.39201	0.000693826	-0.0545034	0.956534	-1.82676	0.0677363	-0.816587	0.414165
rs1169313	50414	HNF1A;C12orf43	1.10309	0.269987	0.11925	0.905078	0.258036	0.796379	0.67382	0.500426	0.774952	0.438368	1.16255	0.245012	1.54411	0.122563	1.10805	0.267839	2.34496	0.0190291	2.19544	0.0281324
rs2317376	3850747	GOSR2	-0.201987	0.839927	3.07604	0.00209772	-3.75159	0.000175714	2.08057	0.0374729	1.6548	0.0979644	0.770485	0.441012	-1.29764	0.194411	2.61929	0.00881123	-1.66296	0.0963213	0.823877	0.41001
rs17481041	3170273	MYOF	-0.0433517	0.965421	0.579955	0.561945	-0.488706	0.62505	-0.292425	0.769962	0.414336	0.678628	-0.477808	0.632787	-1.10773	0.26798	1.10274	0.270139	-1.703	0.0885689	-0.395201	0.692695
rs1329424	380424	CFH	0.197853	0.84316	0.260093	0.794792	-0.404656	0.685731	0.778492	0.436279	1.70873	0.0875001	1.64385	0.100207	-0.803911	0.421448	0.772561	0.439782	0.0421329	0.966393	0.203752	0.838547
rs3915302	2350168	AC010127.3;SCN9A	2.09753	0.0359468	-0.232107	0.816455	0.153009	0.878391	0.729478	0.465709	0.972883	0.330611	1.78083	0.0749408	0.383637	0.701247	1.07169	0.283858	0.383541	0.701318	1.70208	0.088741
rs12084082	2810112	RRAGC	1.75225	0.0797302	2.29803	0.0215598	-2.36646	0.017959	1.08	0.280144	1.21783	0.223289	1.24473	0.21323	-3.41444	0.000639125	1.45094	0.146796	-2.89986	0.0037333	-2.07377	0.0381003
rs7861612	7000397	KANK1	1.43271	0.15194	2.89271	0.00381931	-0.909623	0.363021	2.49217	0.0126966	3.6991	0.000216369	3.23873	0.00120065	-1.05041	0.293529	1.2919	0.196391	1.67132	0.0946585	1.97441	0.0483356
rs589691	1400747	SF1	-2.11755	0.0342131	-1.1422	0.25337	2.05934	0.0394614	-0.798105	0.424809	1.29416	0.195611	-2.18569	0.0288386	7.6968	1.39518e-14	-0.0999272	0.920402	6.47906	9.22979e-11	3.61846	0.000296363
rs339039	940431	CALU	-1.73882	0.0820668	1.18883	0.234508	-1.70822	0.0875962	0.227499	0.820035	1.26298	0.206598	-0.82131	0.41147	-0.0272559	0.978256	0.00726494	0.994203	1.34194	0.179616	-0.595532	0.551488
rs17718103	6860347	FAM46C	0.296053	0.76719	-0.349043	0.727057	1.50902	0.131294	0.202885	0.839225	-0.445913	0.65566	0.899606	0.36833	-0.39031	0.696308	0.506178	0.612732	0.352203	0.724686	1.04228	0.297282
rs2295927	4880544	RP11-92C4.3;GALNT12	1.44031	0.149781	0.876421	0.380801	0.359947	0.718887	0.262212	0.793158	2.05541	0.0398394	1.86418	0.0622961	-0.602347	0.546943	0.906533	0.364654	0.513948	0.607288	0.0447433	0.964312
rs6458318	3710010	PPP2R5D	1.94395	0.0519015	-0.101764	0.918944	-0.59092	0.554574	0.444053	0.657004	0.866349	0.386299	1.80456	0.0711429	0.533948	0.593377	1.50862	0.131396	0.0224935	0.982054	1.30459	0.192032
rs2549794	3930161	ERAP1	-0.345793	0.729498	0.116774	0.907039	-0.304085	0.761063	1.57611	0.115	2.16522	0.0303706	1.28366	0.19926	-0.914527	0.36044	0.133731	0.893616	0.3861	0.699422	1.35141	0.176563
rs3093027	2360255	FGFR1OP	0.317996	0.750488	0.998337	0.318116	-1.00167	0.316503	2.12591	0.0335106	-1.29609	0.194944	0.786022	0.431855	-0.862893	0.388196	0.838148	0.401948	-1.55901	0.118993	-1.30553	0.191712
rs224343	2320307	CEP250	0.3677	0.713097	-0.731017	0.464769	-0.977894	0.328127	-0.271186	0.786248	0.513317	0.60773	0.359465	0.719247	-1.15287	0.248962	0.80092	0.423178	-1.12778	0.259412	-1.02856	0.303687
rs3091242	5220615	C1orf63;RHD	1.78162	0.0748105	-1.59932	0.109749	7.22666	4.95025e-13	-0.339709	0.734076	0.24087	0.809656	0.613384	0.539623	1.31375	0.188929	2.76547	0.00568402	0.196897	0.843908	4.7963	1.61624e-06
rs11133443	6420424	PAICS	-0.239797	0.810488	1.60149	0.109269	-0.384653	0.700495	1.31776	0.187584	1.10161	0.270633	0.396074	0.692051	0.862998	0.388139	-1.13168	0.257771	1.21587	0.224035	0.640925	0.521571
rs4847240	4890706	DR1	1.29897	0.193953	1.03013	0.30295	-0.970748	0.331674	0.336649	0.736382	2.79943	0.00511924	1.49926	0.133807	0.30661	0.75914	0.100031	0.920319	2.74567	0.00603883	2.58602	0.00970903
rs11191548	1010253	NT5C2	0.202146	0.839802	0.805568	0.420492	-0.736688	0.461312	1.95844	0.050178	0.60896	0.542551	-0.288543	0.772931	1.57042	0.116317	-1.16983	0.242069	1.32491	0.185202	0.91031	0.362659
rs2296805	3440086	PEX6	-2.82641	0.00470736	-3.08342	0.00204633	0.342664	0.731851	0.350833	0.725714	-2.95363	0.00314059	-3.59929	0.000319093	7.70779	1.2802e-14	0.124537	0.90089	3.58907	0.000331864	1.26906	0.204418
rs2435385	6130646	RET	0.127678	0.898404	-0.956777	0.33868	-0.379242	0.704508	-0.376052	0.706879	-0.506743	0.612335	0.368555	0.71246	0.0760202	0.939403	0.0277361	0.977873	-0.394697	0.693067	-1.41749	0.156338
rs217373	5220682	TMED4	0.8193	0.412615	1.57994	0.114121	-1.81113	0.0701204	0.93467	0.349959	2.16124	0.030677	2.49986	0.0124241	1.41372	0.157444	1.71827	0.0857482	1.5029	0.132865	2.52066	0.0117136
rs4713367	3780181	FLOT1	3.54891	0.000386836	-1.07275	0.283382	-0.449769	0.652877	0.625807	0.531441	2.63391	0.0084407	3.17377	0.00150471	2.27173	0.0231026	0.300384	0.763884	2.45356	0.0141452	4.09572	4.20852e-05
rs2244608	7650097	OASL	0.33201	0.739882	0.953511	0.340331	0.0698135	0.944342	-0.394905	0.692913	0.957735	0.338196	0.699554	0.484206	1.77133	0.076506	1.35949	0.173991	1.42581	0.153922	2.23805	0.0252177
rs3784041	2760608	ENTPD5	0.497708	0.61869	-0.208031	0.835205	0.694417	0.487421	0.380059	0.703902	0.692539	0.488599	1.01923	0.308095	0.386988	0.698765	1.90003	0.0574293	1.61797	0.105669	2.17493	0.0296351
rs806219	1570280	GCC1	-0.924606	0.355171	1.32339	0.185707	-0.456721	0.647872	2.05283	0.0400894	2.57765	0.00994757	-0.565299	0.57187	-0.203579	0.838683	0.213846	0.830667	1.60695	0.108066	0.702648	0.482275
rs4148436	6110181	ABCC4	1.52943	0.126158	-1.81039	0.070236	3.02976	0.00244751	-1.50196	0.133107	0.801632	0.422766	1.15151	0.249521	2.88242	0.00394638	0.917287	0.358992	2.87045	0.00409894	3.49999	0.000465277
rs8170	4670554	-	0.276063	0.782499	1.19996	0.230156	-1.46929	0.141755	1.57632	0.114952	1.37894	0.167914	0.364968	0.715135	-0.1021	0.918677	1.3501	0.176984	0.46674	0.640686	1.03452	0.300895
rs2281808	7320328	NSFL1C	-0.0358642	0.971391	0.659874	0.509334	0.0564293	0.955	0.674291	0.500126	-0.095491	0.923925	-0.332687	0.739371	-0.629082	0.529295	-0.173739	0.862071	-1.01578	0.309734	0.0114438	0.990869
rs2071421	4150168	ARSA	2.64546	0.00815807	-3.17172	0.00151538	2.21049	0.027071	-1.28216	0.199787	-0.668579	0.503764	0.0816507	0.934924	1.63049	0.102997	3.46164	0.000536896	0.133148	0.894077	2.8957	0.00378316
rs750844	6220070	NT5C	0.0555475	0.955702	0.873555	0.38236	0.990844	0.321762	-0.65164	0.514633	0.327737	0.743111	0.389258	0.697085	-1.18843	0.234665	-0.0959245	0.923581	-0.77882	0.436086	0.344867	0.730194
rs139519	2900292	RANGAP1	-1.23019	0.218624	-0.25756	0.796746	1.23515	0.216775	-0.518059	0.604417	-1.45723	0.145053	0.504468	0.613933	-1.28281	0.19956	1.06829	0.285388	-1.46583	0.142696	-0.32364	0.74621
rs6802033	1300408	HCLS1	-0.353639	0.72361	0.796628	0.425667	1.16307	0.244801	0.657967	0.510559	-0.312085	0.754976	-0.0486435	0.961203	2.02734	0.0426278	0.885065	0.376121	1.32244	0.186023	2.81448	0.00488567
rs315919	2470601	IL1RN	0.32284	0.746817	0.415573	0.677723	0.317066	0.751194	-0.586046	0.557845	-0.10935	0.912925	0.026607	0.978773	0.87461	0.381786	-1.93324	0.0532065	1.35005	0.177001	-0.323168	0.746568
rs479844	6100180	MUS81;EFEMP2	-1.75798	0.0787503	0.509139	0.610655	1.35898	0.174152	1.4453	0.148373	0.330874	0.74074	-1.42179	0.155086	0.0274896	0.978069	-0.79234	0.428163	0.0500147	0.960111	0.52893	0.596854
rs6733301	4560682	CENPO	0.693416	0.488049	-1.46798	0.142111	0.509741	0.610233	-1.57721	0.114748	-0.0130072	0.989622	-0.153113	0.87831	4.94666	7.54965e-07	1.17131	0.241472	2.42627	0.0152548	4.25482	2.09219e-05
rs12198986	6980064	BMP6;TXNDC5	-0.483166	0.628978	-1.07582	0.282008	1.52787	0.126545	-1.03307	0.301573	-0.812735	0.41637	0.349372	0.72681	-1.14047	0.254089	0.570803	0.568133	-1.14668	0.251515	-1.06705	0.285947
rs1520333	5910463	PKIA	-1.19464	0.232227	2.95285	0.00314852	-2.82212	0.00477074	1.80073	0.0717458	2.50476	0.0122534	0.37666	0.706426	-0.62656	0.530948	0.136064	0.89177	1.48759	0.13686	0.0349775	0.972098
rs4785412	520017	PAPD5	-1.09103	0.27526	0.79481	0.426724	-0.434243	0.664112	-0.14843	0.882004	0.266285	0.79002	-0.646764	0.517785	1.15136	0.249583	1.38298	0.166672	0.582246	0.560401	-0.308302	0.757853
rs6088792	1170095	UQCC	-0.0447613	0.964298	0.458466	0.646617	-0.0209328	0.983299	-0.485434	0.627368	1.01615	0.309556	0.0233663	0.981358	-0.822445	0.410823	0.403384	0.686666	0.542843	0.587238	0.334218	0.738215
rs10071838	2030048	LMBRD2	1.05384	0.291955	1.93164	0.0534034	-1.59486	0.110744	0.310123	0.756468	2.20491	0.0274605	3.07998	0.00207017	0.430331	0.666955	1.30613	0.191509	0.492615	0.622285	1.96372	0.0495626
rs9678598	6650541	SP100	1.50829	0.13148	-0.488567	0.625148	-0.390712	0.69601	-0.616322	0.537682	1.09039	0.275541	1.16136	0.245495	-0.279831	0.779607	0.257763	0.79659	-0.0121728	0.990288	1.17522	0.239905
rs1122794	4040170	HBQ1	0.267369	0.789185	-2.10839	0.0349973	1.17581	0.239672	-1.66957	0.0950054	-1.54723	0.121808	-1.69939	0.0892463	1.93792	0.0526327	0.31	0.756561	-1.17538	0.239845	0.299659	0.764437
rs1169313	6280543	OASL	-0.2812	0.778557	-0.139565	0.889003	0.138276	0.890022	-1.05339	0.292163	-0.28048	0.779109	-0.96512	0.334485	0.0497654	0.960309	2.36329	0.0181133	-0.445309	0.656096	-0.197477	0.843454
rs6585827	3930541	PLEKHA1	-1.32446	0.185349	-0.0573931	0.954232	1.53748	0.124177	-1.30655	0.191364	0.604339	0.545618	1.22962	0.218838	-0.961293	0.336405	0.646734	0.517804	-1.43715	0.150677	0.700641	0.483527
rs2472649	1410278	PF4V1	2.4436	0.0145414	-0.79127	0.428786	1.60466	0.108568	-0.00426572	0.996596	1.1405	0.254077	1.61031	0.107329	-0.491205	0.623282	1.53234	0.125438	0.238609	0.811409	2.30969	0.0209053
rs7687054	3440133	RNF150	0.442268	0.658295	-0.785408	0.432215	-1.39439	0.163199	0.259118	0.795544	0.645886	0.518353	-0.480747	0.630696	0.132948	0.894234	1.32367	0.185613	-0.467637	0.640044	0.504159	0.61415
rs235266	6250053	PTTG1IP	1.06653	0.286185	0.709244	0.478173	-0.153762	0.877798	0.604822	0.545297	2.01453	0.043954	1.156	0.247679	2.13185	0.0330188	1.18469	0.236142	1.75424	0.0793886	2.88464	0.00391866
rs11940004	1980088	TMEM33	0.0657755	0.947557	1.68471	0.0920436	0.324688	0.745417	-0.434674	0.663799	-0.185797	0.852604	-0.449344	0.653184	0.753255	0.451296	-1.2515	0.210753	-0.117633	0.906358	0.773074	0.439479
rs1628955	5890564	ANKDD1A	1.04501	0.296019	8.36003	6.27037e-17	-3.65687	0.00025531	7.34091	2.12148e-13	8.9851	2.5851e-19	4.24765	2.16027e-05	0.670116	0.502784	7.35851	1.85973e-13	3.87728	0.000105631	6.72425	1.76499e-11
rs12590956	1660736	ATP6V1D	-0.459433	0.645923	-0.57284	0.566753	-0.0470821	0.962448	-1.54819	0.121576	0.78297	0.433645	-0.318714	0.749943	1.20888	0.226709	-0.110501	0.912012	1.30981	0.190259	0.26611	0.790154
rs11200594	6650324	PLEKHA1	-1.11565	0.264573	-1.14763	0.25112	0.269685	0.787402	-2.3554	0.0185028	1.11746	0.263797	-0.330224	0.741231	0.588516	0.556186	0.396823	0.691498	1.29915	0.193893	-0.108363	0.913708
rs902192	2350037	HRASLS	-0.71183	0.47657	-0.479756	0.631401	0.0647441	0.948378	-0.651744	0.514566	0.857557	0.391137	0.268658	0.788193	1.58615	0.112706	0.598894	0.549244	2.19133	0.0284282	0.530927	0.59547
rs2715866	7150139	IAH1;ADAM17	1.58202	0.113646	1.5093	0.131221	-0.321237	0.748031	0.69792	0.485227	1.93219	0.053336	1.70177	0.0887994	-1.23708	0.216058	2.21417	0.0268173	0.109719	0.912632	2.10089	0.0356503
rs489219	3140110	TPGS2	1.45741	0.145003	-0.899479	0.368397	6.36353	1.97172e-10	-1.16997	0.242011	1.49707	0.134376	2.13732	0.0325716	4.79752	1.60645e-06	0.648814	0.516459	4.89403	9.87893e-07	5.73129	9.96668e-09
rs10876994	5670577	TSPAN31	-0.849195	0.395773	0.669091	0.503437	-0.715771	0.474133	0.649947	0.515726	0.117064	0.90681	-0.620317	0.535049	-0.470188	0.638221	0.54327	0.586944	-0.604668	0.5454	0.697458	0.485516
rs10495579	7000382	PQLC3	-0.919599	0.357782	1.93329	0.0532001	-1.35811	0.17443	1.17072	0.241713	1.40252	0.160759	0.521546	0.601986	-0.580007	0.56191	0.293668	0.769011	0.952689	0.340748	-0.113374	0.909734
rs2293154	1940487	STAT5A	-1.02909	0.303438	-0.0683977	0.945469	-0.856515	0.391713	0.656386	0.511576	0.0170593	0.986389	-1.69238	0.090573	-0.185037	0.8532	-0.302142	0.762544	-0.490792	0.623574	-0.885126	0.376089
rs16889440	2640274	ALDH5A1	3.75263	0.000174992	-1.17206	0.241174	1.55364	0.12027	-0.0640294	0.948947	1.0097	0.312637	3.05866	0.00222326	0.377543	0.70577	0.764223	0.444734	0.167412	0.867046	3.78558	0.00015335
rs2727261	5220240	BEST1;FTH1	0.430034	0.667171	-0.0706754	0.943656	-1.14606	0.251771	1.13374	0.256903	0.101227	0.919371	0.928971	0.352904	1.06404	0.287313	-0.258438	0.796069	0.683304	0.494415	-0.0033463	0.99733
rs8039437	5890524	LINS	1.61153	0.107063	4.90772	9.21397e-07	-3.00857	0.00262476	3.25703	0.00112583	6.49533	8.28541e-11	4.01871	5.85165e-05	-1.44608	0.148154	3.20569	0.0013474	3.25179	0.0011468	4.51578	6.30831e-06
rs1562990	2260129	MS4A6A	1.49542	0.134805	-0.953325	0.340426	0.93445	0.350072	0.125922	0.899794	0.172838	0.862779	0.889576	0.373694	1.49156	0.135814	0.0425811	0.966035	0.949317	0.34246	1.52312	0.127728
rs7087501	1300059	2015-03-05	0.305179	0.76023	0.746968	0.455083	-0.0277813	0.977837	-0.479483	0.631595	2.14486	0.0319644	1.26279	0.206663	1.86765	0.0618106	1.61352	0.106631	2.8558	0.00429284	2.87606	0.00402673
rs805262	5340382	BAG6	-0.255676	0.798201	-0.0403738	0.967795	0.202539	0.839496	-0.0736338	0.941302	-0.0210961	0.983169	-0.462945	0.643404	0.836026	0.40314	0.549233	0.582845	0.795792	0.426153	0.287653	0.773612
rs138880	5490014	ZBED4	-0.841904	0.399842	-0.196643	0.844107	0.853536	0.393362	-0.506768	0.612318	0.128367	0.897858	-0.250024	0.802569	-0.248569	0.803694	-0.75527	0.450087	1.41468	0.157162	1.01686	0.30922
rs2301668	7400243	MAU2	0.488285	0.625348	-0.385054	0.700197	-0.573	0.566645	0.32713	0.743569	1.69678	0.0897381	1.52855	0.126376	3.49479	0.000474434	1.04927	0.294054	3.3506	0.000806365	2.9135	0.00357403
rs6503721	60154	PTGES3L-AARSD1;AARSD1	-1.05955	0.289347	-0.692766	0.488456	0.576721	0.564128	0.905155	0.365384	-1.1679	0.242847	-0.907852	0.363956	1.22868	0.219193	-1.05241	0.29261	-0.628653	0.529576	-1.03093	0.302573
rs4702982	2230082	-	0.879209	0.379288	1.31321	0.189112	-1.20424	0.228496	1.48444	0.137691	2.81265	0.00491358	2.26967	0.0232274	3.03042	0.0024421	1.96857	0.0490021	3.7761	0.000159305	3.89515	9.81388e-05
rs4246215	630445	RP11-467L20.9;C11orf10	-1.8584	0.0631123	0.197193	0.843676	-0.437766	0.661556	0.819114	0.412721	0.488029	0.625529	-0.879862	0.378934	0.97348	0.330315	0.868786	0.384964	0.552469	0.580627	0.624693	0.532173
rs8182584	1430280	CTD-2540B15.11;AC008738.1;CEBPA	-0.37659	0.706478	0.143643	0.885782	0.841925	0.39983	0.0397665	0.968279	0.247048	0.804871	-0.107114	0.914698	0.949971	0.342127	1.35724	0.174706	0.275812	0.782692	-0.0777204	0.93805
rs7302060	4180050	TIMELESS	-0.990143	0.322104	-0.0212998	0.983006	0.0363865	0.970974	-0.471037	0.637614	-0.464366	0.642386	-0.422385	0.672744	1.00396	0.315399	-1.97192	0.0486193	0.485705	0.627176	-0.0488683	0.961024
rs10993160	4640427	HIATL1	3.83477	0.000125681	0.437707	0.661599	-1.77198	0.0763986	0.684877	0.493422	3.4194	0.00062759	4.10893	3.97501e-05	-0.38804	0.697987	4.30098	1.70042e-05	1.75151	0.0798584	3.09694	0.00195532
rs11830186	50435	DNM1L;YARS2	-0.300193	0.76403	2.091	0.0365283	0.227106	0.820341	0.851347	0.394577	1.74674	0.0806816	0.845917	0.397599	-0.29531	0.767757	0.405941	0.684786	0.908478	0.363626	0.296265	0.767028
rs11756438	3170403	CEP85L	0.784191	0.432928	-1.39613	0.162677	1.09364	0.274114	-0.605379	0.544927	-1.07373	0.282942	0.364212	0.7157	2.25476	0.0241481	-0.799686	0.423893	1.11016	0.26693	1.71578	0.0862019
rs12597563	430392	MSLN;HAGHL	-1.18903	0.234427	0.712538	0.476132	-0.782713	0.433796	0.425071	0.670785	1.6639	0.0961328	-0.905996	0.364938	0.0809942	0.935447	0.173417	0.862324	1.14684	0.251449	0.758764	0.447994
rs7314410	3190524	KNTC1;HCAR1	-0.305804	0.759754	1.28031	0.200435	-2.05062	0.0403041	2.35454	0.0185455	0.125489	0.900136	-0.519372	0.603502	-0.311229	0.755626	-0.00169257	0.99865	0.212105	0.832025	-0.20859	0.834768
rs11718115	1820746	NPHP3	3.6169	0.00029815	2.9948	0.00274628	-1.55461	0.120039	2.0397	0.0413797	3.66052	0.000251699	4.90511	9.33772e-07	-2.20633	0.0273612	3.23102	0.0012335	-1.18776	0.234929	1.55808	0.119214
rs1552607	110682	AL591893.1;S100A11	0.42548	0.670486	0.604664	0.545402	0.0262407	0.979065	1.82091	0.0686201	-0.0985744	0.921476	0.339293	0.734389	0.895272	0.370642	-0.424562	0.671156	0.0295988	0.976387	0.58933	0.55564
rs12586591	5080364	ACTN1	-0.633563	0.526366	0.752002	0.45205	0.168153	0.866463	-0.311447	0.755461	-0.762016	0.44605	-0.832297	0.405241	-0.626529	0.530968	0.88894	0.374035	-0.782094	0.434159	0.912618	0.361443
rs5415	1170022	RP1-4G17.5;ELP5	-1.41919	0.155842	0.518938	0.603804	0.216256	0.828788	0.128473	0.897775	0.152799	0.878557	-0.139502	0.889053	-0.83294	0.404879	1.22897	0.219083	-0.3922	0.69491	-0.644768	0.519078
rs2302104	1980500	ZMAT2	0.387303	0.698532	-0.0892527	0.928881	3.07479	0.00210654	0.757715	0.448622	0.104059	0.917123	0.255209	0.798562	1.96639	0.0492531	-1.05062	0.293432	1.0298	0.303104	0.234892	0.814293
rs10501320	5810398	SPI1	0.176772	0.859687	0.513032	0.607929	-2.5139	0.0119404	1.54933	0.121303	-0.353147	0.723978	0.180341	0.856885	-0.423435	0.671978	0.448245	0.653977	-0.757942	0.448486	0.114441	0.908888
rs7204439	6840390	MSLN;FBXL16	0.634352	0.525851	0.90387	0.366064	-0.957155	0.338489	0.332063	0.739842	0.11479	0.908611	-1.16437	0.244274	-0.589139	0.555768	-0.43843	0.661074	-0.377774	0.705598	-0.168426	0.866248
rs4796713	3400408	NT5C3L	-3.69304	0.000221586	-2.05468	0.0399103	0.0100508	0.991981	-2.02231	0.0431445	-4.7697	1.84504e-06	-5.06643	4.05342e-07	1.17318	0.240723	-0.990687	0.321839	-1.65787	0.0973444	-2.87157	0.00408443
rs712039	4150278	DUSP14	-0.73645	0.461457	0.193291	0.846731	-0.278412	0.780696	2.04379	0.0409747	1.07832	0.280892	-0.680711	0.496054	2.47256	0.0134151	-0.949734	0.342248	1.94026	0.0523476	0.624382	0.532377
rs6717825	6250192	COL6A3	0.678091	0.497714	-0.602642	0.546747	0.503877	0.614348	0.440587	0.659512	0.00792717	0.993675	0.232997	0.815764	1.16656	0.24339	-0.729968	0.46541	0.289809	0.771962	-0.394867	0.692941
rs1765266	1740121	KIAA1024	1.21582	0.224053	2.84079	0.00450017	-1.32957	0.183661	1.82326	0.0682644	3.10745	0.00188707	2.20237	0.0276394	-1.8132	0.0698006	0.233733	0.815192	0.289799	0.77197	0.581676	0.560785
rs2290159	6100703	RAF1	1.34374	0.179034	0.0937622	0.925298	0.220472	0.825503	0.0610377	0.951329	1.30655	0.191366	1.3356	0.181681	0.222675	0.823788	1.00565	0.314583	0.131725	0.895202	1.26032	0.207553
rs11586379	4490446	ATP8B2	-0.110914	0.911684	-1.83236	0.0668972	1.68566	0.0918603	0.0620077	0.950557	-0.842121	0.39972	-0.754111	0.450783	1.63048	0.103001	1.72477	0.0845685	0.00649214	0.99482	2.26743	0.0233637
rs6977940	670082	AMZ1;GNA12	0.583948	0.559256	-0.502315	0.615446	3.49828	0.000468273	0.179646	0.85743	-0.998652	0.317963	-0.773529	0.439209	-0.493343	0.62177	0.525559	0.599195	-1.04114	0.297809	1.51935	0.128675
rs1092913	4180544	ROPN1L	0.561781	0.574265	0.10071	0.91978	0.959222	0.337447	0.194871	0.845494	1.45841	0.144729	1.7509	0.0799636	-0.14985	0.880883	-0.018361	0.985351	1.23969	0.215092	0.993563	0.320435
rs254460	6330397	TRIM7	-0.621847	0.534042	-1.63336	0.102393	1.28689	0.198133	-0.678702	0.497327	-0.975997	0.329066	-1.08801	0.276589	-0.483512	0.628732	-0.413343	0.679355	0.0121568	0.9903	0.224329	0.822501
rs9386223	6220673	SASH1	0.616606	0.537495	0.153152	0.878279	-0.671222	0.502079	-0.157688	0.874703	0.505461	0.613235	0.559327	0.575938	-0.00284994	0.997726	0.994326	0.320064	-0.689178	0.490711	0.212111	0.83202
rs7296331	6580541	UHRF1BP1L	0.405888	0.684825	-0.050904	0.959402	0.651498	0.514725	-0.503429	0.614663	0.199455	0.841907	0.527029	0.598173	0.187869	0.850979	1.00052	0.317058	0.821417	0.411409	0.892759	0.371986
rs6702784	3400674	MRPS15	2.06509	0.0389147	1.20173	0.229467	-0.464909	0.641997	0.350578	0.725905	1.61624	0.106043	2.34291	0.0191339	-0.722388	0.470056	0.0461398	0.963199	-0.312745	0.754474	2.75999	0.0057803
rs7113199	3940014	GLB1L2	-0.706737	0.47973	0.644055	0.51954	-0.809277	0.418356	0.147849	0.882462	0.734966	0.46236	-0.732221	0.464034	0.0757469	0.93962	-0.370032	0.711359	1.15756	0.247043	-1.1386	0.254869
rs4657616	7000270	PYHIN1	-1.07941	0.280407	0.665248	0.505892	0.0442062	0.96474	0.553855	0.579678	0.119378	0.904976	-0.542036	0.587793	0.423351	0.672039	-0.977325	0.328408	0.352521	0.724447	0.22735	0.820151
rs12757620	1940605	WRAP73	0.249253	0.803165	-1.13259	0.257386	-0.0582455	0.953553	-0.597095	0.550444	-0.375523	0.707271	-0.249303	0.803126	2.38477	0.0170897	-0.273941	0.78413	1.90535	0.0567342	1.70569	0.0880659
rs4839556	460102	CD53	0.226978	0.820441	-1.00632	0.314264	-0.122501	0.902502	0.322819	0.746833	-0.853691	0.393276	-0.152956	0.878433	-0.282052	0.777904	0.0256009	0.979576	-0.891399	0.372715	-1.25616	0.209058
rs12145377	5870746	PPP2R5A	4.40491	1.05827e-05	-1.42283	0.154786	0.967317	0.333385	0.743872	0.456954	2.43373	0.0149443	3.54965	0.00038575	0.595968	0.551197	2.44029	0.0146756	0.851302	0.394601	4.49171	7.06524e-06
rs174574	380224	FADS2	0.000210215	0.999832	0.521374	0.602106	-1.43773	0.150511	0.514183	0.607124	0.285977	0.774896	-0.692977	0.488324	-0.0402942	0.967859	1.26121	0.207232	-0.0492568	0.960715	0.265122	0.790916
rs9358858	620189	LRRC16A	0.864177	0.387491	0.583165	0.559782	-0.0869603	0.930703	0.970096	0.331998	1.87258	0.0611261	0.588303	0.556329	0.0806293	0.935737	1.09559	0.273259	1.66489	0.0959348	2.69603	0.0070171
rs6936004	6450692	PSMB9	0.752492	0.451755	-1.35652	0.174934	0.850094	0.395273	-1.31717	0.187781	-0.488234	0.625384	1.38195	0.166987	1.01914	0.308137	0.445153	0.656209	0.07468	0.940469	0.239132	0.811003
rs7289754	4180692	VPREB1	-0.479716	0.631429	1.36751	0.171465	-1.55665	0.119553	1.60823	0.107784	0.765545	0.443947	0.250111	0.802501	-0.284913	0.775711	0.0545398	0.956505	-0.01235	0.990146	0.0189935	0.984846
rs7168353	6020682	RGMA	0.316226	0.751831	0.39962	0.689437	-0.520537	0.602689	0.464834	0.642051	0.322583	0.747011	0.766851	0.44317	-1.68612	0.0917725	-0.537236	0.591105	-1.48654	0.137136	-0.424303	0.671345
rs6537709	1300435	FAM212B	3.77778	0.00015823	-0.528209	0.597354	1.06648	0.286208	0.85308	0.393615	1.07676	0.281588	2.68859	0.00717543	2.45572	0.0140603	2.11287	0.034612	2.52803	0.0114705	5.44295	5.24049e-08
rs3740049	3830040	HERC4	1.09564	0.273237	1.93916	0.0524818	-2.24288	0.0249045	2.88895	0.00386525	3.451	0.00055851	2.1438	0.0320488	-0.175658	0.860563	0.106022	0.915565	1.90421	0.0568826	1.2185	0.223034
rs174541	380224	FADS2	-0.0625444	0.950129	0.492726	0.622206	-1.57369	0.11556	0.612913	0.539934	0.364246	0.715674	-0.571533	0.567639	0.0525623	0.958081	1.25006	0.211277	0.0629533	0.949804	0.302149	0.762539
rs178844	2680162	NF1;CTD-2370N5.3;EVI2A	0.556184	0.578085	-5.0844	3.68786e-07	2.94868	0.00319135	-2.26967	0.0232279	-4.87764	1.07364e-06	-2.69804	0.00697486	3.17678	0.0014892	-2.65095	0.00802662	-0.551884	0.581028	-1.10748	0.268087
rs2857151	3940477	TAP2	1.94657	0.0515868	0.358907	0.719664	-0.0144105	0.988503	-0.584216	0.559075	-0.233712	0.815209	0.787127	0.431208	0.751158	0.452557	-0.156095	0.875958	-0.138324	0.889984	0.0979561	0.921967
rs10818454	4250056	TRIM14	-0.432154	0.665629	0.0685014	0.945387	-1.01073	0.312146	1.16771	0.242923	-1.30324	0.192493	-0.869943	0.384332	0.452014	0.651259	0.289891	0.771899	-0.912731	0.361384	-1.16506	0.243993
rs6591177	5340687	C11orf85	1.55507	0.11993	-0.279923	0.779537	0.136934	0.891083	-0.240784	0.809722	-0.323143	0.746587	0.576445	0.564315	-0.419002	0.675215	0.50714	0.612056	-0.956868	0.338634	-0.754342	0.450644
rs4630591	1850079	KANSL1	-0.153721	0.87783	-1.13959	0.254457	0.935008	0.349784	-0.208661	0.834713	-0.422198	0.672881	0.0253001	0.979816	1.99259	0.0463059	0.384256	0.700789	1.97227	0.0485786	1.11258	0.265891
rs12110	3400278	FXYD5	0.91909	0.358049	-2.36424	0.0180672	2.30727	0.0210396	-1.01969	0.307876	-0.600628	0.548088	-0.265918	0.790303	2.57239	0.0100999	0.118718	0.905499	1.03317	0.301524	1.87707	0.0605091
rs2239908	4150593	SARM1;SLC46A1	-0.585936	0.557919	0.684587	0.493604	-0.278697	0.780477	1.2893	0.197294	1.68798	0.0914156	1.14737	0.25123	2.28482	0.0223231	0.248325	0.803883	2.8218	0.00477548	0.707776	0.479084
rs2218342	3290431	AC068831.6;UNC45A	0.773607	0.439163	1.78562	0.0741606	1.27188	0.203415	1.99541	0.0459987	0.27704	0.78175	0.199458	0.841905	-2.66437	0.0077132	-0.0949193	0.924379	-2.38634	0.0170169	0.12425	0.901118
rs1254044	4210470	PCNXL4	-0.172932	0.862705	0.34344	0.731268	0.188831	0.850225	0.467317	0.640273	0.751533	0.452332	0.304337	0.760871	0.00652909	0.994791	-0.394352	0.693321	0.398248	0.690447	0.114357	0.908955
rs9415049	6510274	CDH23	0.147683	0.882593	-0.0591064	0.952867	-0.814962	0.415094	-1.72297	0.0848939	0.22308	0.823473	0.0294707	0.976489	0.144688	0.884957	1.20715	0.227373	-0.653324	0.513548	-0.274176	0.78395
rs12567682	3870484	RP1-184J9.2;LUZP1	-2.06528	0.0388969	0.178567	0.858278	0.180807	0.856519	-0.061406	0.951036	-0.740377	0.459071	-1.74539	0.0809163	0.0615614	0.950912	-0.588085	0.556475	-0.373339	0.708896	-1.36828	0.171226
rs549262	4850241	RSPH4A	-0.238723	0.81132	0.106903	0.914866	-0.120162	0.904355	-0.561232	0.57464	0.761008	0.446653	0.686793	0.492213	0.271995	0.785626	-0.0453486	0.963829	0.742877	0.457556	-0.966668	0.33371
rs2336030	3800398	FBXO6	0.179907	0.857225	-0.016645	0.98672	1.17375	0.240495	-0.895871	0.370322	-0.112367	0.910533	-0.342112	0.732267	-1.31557	0.188319	0.38197	0.702484	-0.699706	0.484111	0.164484	0.86935
rs7204439	6900431	MSLN;HAGHL	0.898993	0.368656	-0.900924	0.367629	0.867474	0.385682	0.00848864	0.993227	0.388362	0.697749	-0.621818	0.534061	0.851253	0.394629	-0.666784	0.50491	1.37046	0.170544	1.23636	0.216325
rs2748378	3190164	TXNDC5;BLOC1S5-TXNDC5;BLOC1S5	1.97373	0.0484122	0.407773	0.68344	-1.51417	0.129982	-1.37787	0.168242	2.06546	0.0388799	2.19161	0.0284074	0.548675	0.583229	1.97221	0.0485861	1.8415	0.0655484	1.9171	0.0552247
rs36527	1580292	EEF2	-0.105116	0.916283	-0.939628	0.347408	1.17257	0.24097	-1.32216	0.186116	-1.14165	0.253598	-0.650594	0.515308	-0.278885	0.780333	-0.413037	0.67958	-0.759647	0.447465	-0.857266	0.391298
rs17403796	2900722	DNAJC13	-2.59843	0.00936521	-0.134677	0.892867	-0.713049	0.475815	-0.0532845	0.957505	-0.995637	0.319427	-1.50758	0.131661	-0.845357	0.397911	-1.05664	0.290677	-0.44706	0.654832	-1.43518	0.151236
rs6559892	2470746	NAA35	-2.00395	0.0450754	2.55258	0.0106927	-2.89895	0.00374414	2.12358	0.0337054	1.94565	0.0516967	0.246193	0.805533	-0.215623	0.829282	-1.22306	0.221306	1.24065	0.214736	-0.656054	0.511789
rs11579015	2100196	ISG15	-0.2306	0.817626	-0.554807	0.579027	-0.52511	0.599507	-1.85628	0.0634132	-1.55871	0.119064	-0.722872	0.469759	0.155248	0.876626	-0.673575	0.500582	-1.1947	0.232204	-1.35967	0.173935
rs6861	2760491	ATG16L1	-0.412419	0.680033	-0.218091	0.827358	0.836566	0.402837	-1.91841	0.0550586	-0.770917	0.440756	-0.946371	0.34396	0.44385	0.657151	1.78605	0.0740912	-0.0798729	0.936338	-1.04056	0.298079
rs12678919	5560674	LPL	1.70317	0.0885371	1.11545	0.264656	-2.496	0.0125601	1.43518	0.151235	2.21355	0.0268597	2.24595	0.0247075	-0.52848	0.597166	1.02604	0.304872	1.67605	0.0937294	2.12803	0.0333343
rs6684101	2900142	TDRKH	-0.00387331	0.99691	3.03546	0.00240173	-2.42384	0.0153574	2.10114	0.035629	3.10163	0.00192458	1.23838	0.215575	-0.190148	0.849193	1.79476	0.0726915	1.37251	0.169905	1.84067	0.0656706
rs140119	5420068	ZMAT5	-1.61961	0.105317	-0.817993	0.413361	-0.287549	0.773692	-0.521297	0.60216	-0.145941	0.883968	-1.60639	0.108189	0.688479	0.491151	0.0121572	0.9903	0.835486	0.403444	-0.455475	0.648768
rs8070473	2340451	AP2B1	-2.0235	0.0430216	-0.384749	0.700423	-0.522029	0.60165	0.881117	0.378255	-0.874794	0.381686	-2.41875	0.0155738	-0.174763	0.861266	-0.0530716	0.957675	-0.756689	0.449236	-2.5186	0.0117823
rs4380451	2480037	CMTM8	-2.10377	0.0353983	-1.13288	0.257266	0.740183	0.459189	-0.387812	0.698155	-0.993589	0.320423	-1.99952	0.0455524	2.40492	0.0161761	-0.188951	0.850131	0.963899	0.335097	0.349709	0.726557
rs2839625	2100537	PKNOX1	-2.45371	0.0141391	-1.20709	0.227399	0.206666	0.836271	-1.28774	0.197838	-1.84718	0.0647213	-2.98371	0.00284773	2.7906	0.00526109	-1.6087	0.107682	0.924282	0.355339	-0.594636	0.552087
rs7428949	7400653	PFKFB4	-1.52778	0.126566	0.130477	0.896189	0.0135774	0.989167	-0.520282	0.602867	-0.556053	0.578174	-0.767718	0.442655	-0.0697022	0.944431	-2.07335	0.0381399	-0.375663	0.707167	0.123254	0.901906
rs1020388	4050600	ANKRD55	-0.436851	0.66222	0.791636	0.428573	-0.174222	0.861691	1.61645	0.105998	-0.264349	0.791511	-0.438499	0.661025	-0.785939	0.431903	-0.878833	0.379492	-1.12513	0.260535	-0.524089	0.600216
rs13278548	5670519	RP11-21C4.1	0.225226	0.821803	0.549461	0.582689	0.56478	0.572224	0.90517	0.365375	0.696625	0.486038	0.917878	0.358683	0.573074	0.566595	-0.547631	0.583945	0.633949	0.526114	-0.0237536	0.981049
rs2523393	5220070	HLA-F	4.5746	4.77133e-06	0.753228	0.451313	0.12742	0.898608	1.87362	0.0609835	2.5812	0.00984586	3.95286	7.72215e-05	2.22619	0.0260014	1.64001	0.101003	2.75484	0.005872	4.7096	2.48209e-06
rs790116	6420142	HSPBAP1	-0.0471984	0.962355	1.82498	0.0680045	-2.58659	0.00969304	1.88912	0.0588754	1.69143	0.0907542	-0.016288	0.987005	0.623252	0.533119	-0.0579412	0.953795	1.57072	0.116249	1.18154	0.237386
rs10484554	3170064	MICB	-1.5487	0.121454	1.55562	0.119798	-0.894949	0.370814	1.30858	0.190676	0.601004	0.547837	-0.693855	0.487773	-1.19509	0.23205	0.165935	0.868208	-0.78522	0.432324	-0.797333	0.425258
rs2470893	4010041	MPI	-0.893806	0.371426	0.546781	0.584529	-1.7375	0.0822984	0.65569	0.512024	0.741018	0.458683	-0.108008	0.913989	0.374592	0.707964	-0.450265	0.65252	0.331449	0.740306	-0.567316	0.570499
rs17482753	5560674	LPL	1.80371	0.0712768	1.50905	0.131285	-2.49435	0.0126188	1.42213	0.154989	2.86826	0.00412735	2.62025	0.00878664	-0.338785	0.734771	0.81369	0.415823	2.14394	0.0320378	2.71001	0.00672805
rs181359	1230242	UBE2L3	-0.060407	0.951831	0.362317	0.717115	0.0508412	0.959452	0.907244	0.364278	0.566675	0.570935	-0.0839705	0.93308	0.405356	0.685216	-0.479211	0.631789	0.66171	0.508157	0.809762	0.418077
rs2228315	4210544	SELPLG	-1.54639	0.122012	-2.53869	0.0111268	1.70899	0.0874532	-0.513783	0.607404	-2.05036	0.0403293	-2.13163	0.0330372	3.81794	0.000134572	-0.269546	0.78751	0.97692	0.328609	1.40038	0.161398
rs2686586	6100168	GOLIM4	-2.13602	0.0326778	-1.41571	0.15686	2.08267	0.037281	0.235057	0.814165	-1.36952	0.170837	-1.87432	0.0608866	0.904075	0.365956	-2.22295	0.0262193	-0.0700312	0.944169	-0.679816	0.496621
rs9309473	5130736	ALMS1	2.0196	0.0434252	-1.27106	0.203708	0.48726	0.626074	-1.21843	0.22306	0.0424443	0.966145	0.645516	0.518593	1.08888	0.276206	2.10308	0.0354591	-0.611216	0.541057	2.50711	0.0121723
rs5017686	2350053	GFPT1	0.464647	0.642184	0.916872	0.35921	0.795626	0.426249	1.08108	0.279663	1.8522	0.0639964	1.66317	0.0962776	1.02324	0.306192	0.775939	0.437785	2.15418	0.0312261	0.962825	0.335635
rs4950806	5570601	RP11-465N4.4;RNPEP	3.73849	0.000185128	-4.3047	1.67213e-05	2.794	0.00520608	-3.08235	0.00205373	-0.673547	0.500599	1.01663	0.30933	3.86415	0.000111478	2.3632	0.0181177	1.26276	0.206675	3.16489	0.00155141
rs3814071	6020132	CLIC5	1.7528	0.0796371	0.156979	0.875262	0.995641	0.319425	0.339286	0.734394	0.546001	0.585065	1.40756	0.159263	0.328772	0.742328	0.9336	0.35051	1.10722	0.268199	2.53286	0.0113136
rs2293013	5910202	PIH1D1	0.486059	0.626926	-0.895668	0.37043	1.2371	0.216048	-1.47289	0.14078	-1.00914	0.31291	0.198437	0.842703	-0.0223771	0.982147	0.67171	0.501768	-1.15816	0.246799	0.481329	0.630283
rs7189020	6250553	ITFG3	-0.676979	0.498419	-0.634369	0.52584	1.51535	0.129683	-1.00089	0.31688	0.59243	0.553563	-1.00049	0.317072	1.46684	0.142419	0.513659	0.607491	0.363934	0.715907	-1.77773	0.0754484
rs1494961	2060477	AGPAT9	0.88571	0.375774	-0.178633	0.858226	-1.30054	0.193416	-0.953238	0.34047	0.545355	0.585509	0.633455	0.526437	2.98334	0.00285119	0.603994	0.545848	0.953943	0.340113	0.751482	0.452363
rs2249057	2070220	C21orf58	1.15061	0.249893	-0.686199	0.492588	0.681808	0.49536	-0.224704	0.822209	-0.156257	0.875831	0.244011	0.807222	0.801227	0.423	-0.262653	0.792818	0.307312	0.758606	0.605842	0.54462
rs11919886	3890255	TOP2B	0.408778	0.682702	-0.984878	0.324684	0.267503	0.789082	-0.655406	0.512207	-2.28034	0.0225873	-1.12921	0.25881	-0.696199	0.486304	0.805432	0.420571	-2.42959	0.0151159	-1.81289	0.0698494
rs7549276	6480674	HCN3	-0.90691	0.364454	1.86877	0.0616544	-1.70573	0.0880579	2.54431	0.0109495	-0.156988	0.875254	-1.30908	0.190507	-0.252109	0.800957	1.41268	0.157751	-1.00408	0.315342	-1.81243	0.0699192
rs9271366	2650156	TAP2	0.576471	0.564297	0.178222	0.858549	-0.527609	0.597771	0.704633	0.481038	0.405943	0.684784	0.202903	0.839211	1.41797	0.1562	1.32392	0.18553	1.58204	0.113641	0.555854	0.578311
rs9275698	2650156	TAP2	0.69559	0.486686	0.0655147	0.947764	0.470051	0.638319	-0.423216	0.672137	-0.747033	0.455044	-0.12028	0.904261	0.566748	0.570885	1.44876	0.147404	-0.65716	0.511078	1.15815	0.246804
rs13335476	1300113	CDH1	-0.539557	0.589502	0.836183	0.403052	-1.00079	0.316927	-0.0241224	0.980755	0.858257	0.390751	0.0270119	0.97845	0.788702	0.430286	-1.59179	0.111432	1.1833	0.23669	1.19639	0.231544
rs2713243	6510240	TFCP2L1	1.0082	0.313356	0.054156	0.956811	0.231791	0.816701	0.0231437	0.981536	-0.693628	0.487916	0.683197	0.494482	0.444081	0.656984	1.36549	0.1721	-1.09852	0.271977	0.60057	0.548126
rs11198226	4860180	RAB11FIP2	2.73041	0.00632561	1.58886	0.112092	-0.76113	0.446579	0.625035	0.531948	0.255403	0.798412	2.67269	0.00752465	-1.59723	0.110214	0.346236	0.729165	-1.90229	0.0571335	0.0911675	0.92736
rs2286928	290053	AC006547.8;DGCR8	-0.38523	0.700067	1.17018	0.241928	1.39282	0.163673	0.628972	0.529367	-0.110556	0.911968	-0.115025	0.908425	1.7029	0.0885876	0.907688	0.364043	0.940076	0.347178	1.74609	0.0807956
rs2232853	6100767	ADIPOR1	1.27298	0.203027	0.0783774	0.937528	-1.61562	0.106177	0.778653	0.436184	2.26021	0.0238085	0.474867	0.634881	1.20447	0.228406	1.38694	0.165459	2.37502	0.0175482	2.22921	0.0257999
rs1152443	990112	KCNK13	-0.906892	0.364464	0.767658	0.44269	-0.0130688	0.989573	-1.48475	0.137611	1.14262	0.253198	-0.158233	0.874273	-1.48756	0.136866	0.640518	0.521836	-0.310204	0.756405	-0.713861	0.475313
rs7112513	4890328	SIDT2	1.60351	0.108823	2.47828	0.0132017	-2.00376	0.0450961	2.33906	0.0193323	3.67234	0.000240336	3.10337	0.00191328	-1.27951	0.200717	2.03968	0.0413826	0.900053	0.368092	1.46262	0.143571
rs280519	5550278	ICAM3	1.45497	0.145678	0.980243	0.326966	-0.0278006	0.977821	0.935652	0.349452	1.89907	0.0575553	2.0414	0.0412111	-1.44686	0.147935	-0.719285	0.471965	-0.661997	0.507973	1.59137	0.111527
rs873634	20673	BSG;AC009005.3	-0.551324	0.581411	2.38213	0.0172129	-1.76982	0.0767566	3.74727	0.00017877	1.57428	0.115423	0.0809833	0.935455	0.265575	0.790566	0.643288	0.520037	1.58003	0.1141	1.96692	0.0491919
rs2028382	4670059	MLK7-AS1;MLTK	2.61218	0.00899668	-0.875799	0.381139	-0.177401	0.859193	0.608014	0.543178	-1.31405	0.188831	-3.47592	0.000509109	0.203568	0.838691	-2.4196	0.0155376	-0.122658	0.902378	-1.70707	0.0878098
rs10795917	5390603	UPF2	0.255569	0.798283	-0.385208	0.700084	0.329645	0.741668	-0.0907463	0.927694	-1.65076	0.0987867	-0.343538	0.731194	0.725222	0.468316	-0.0210602	0.983198	-0.69127	0.489396	-0.327518	0.743276
rs12933766	4830689	AC009133.14;AC009133.20;MAZ	1.08425	0.278256	-0.485698	0.627181	0.809751	0.418083	-0.860535	0.389494	-0.255405	0.79841	0.561623	0.574373	0.979152	0.327505	-1.61923	0.105398	1.09463	0.273677	-0.0273888	0.97815
rs4634868	630142	FHL3	2.65024	0.00804335	-1.82937	0.0673436	0.389901	0.69661	0.198384	0.842745	1.07866	0.28074	2.16056	0.0307291	2.35134	0.0187057	3.27475	0.00105755	0.879049	0.379375	3.99706	6.41351e-05
rs642803	6110008	FIBP	1.75411	0.0794111	0.90003	0.368104	-1.13118	0.25798	1.30946	0.190378	1.58446	0.113088	1.47014	0.141523	-1.10664	0.268451	0.446609	0.655157	0.542923	0.587183	0.931283	0.351707
rs2180341	7650053	RP11-73O6.4;ECHDC1	2.619	0.00881871	-2.46383	0.0137461	0.522714	0.601173	-1.69055	0.0909234	0.317722	0.750696	2.02362	0.0430095	2.07293	0.0381785	0.070859	0.94351	0.954155	0.340005	1.86778	0.0617927
rs2651838	4070097	TSPAN32	-0.823137	0.41043	0.191768	0.847924	-0.797001	0.425451	-0.480288	0.631022	0.956701	0.338718	0.421835	0.673145	-0.390582	0.696106	0.680403	0.496249	-0.666215	0.505274	-0.173873	0.861966
rs2239535	7380709	YWHAB	0.343454	0.731257	-0.0576311	0.954042	0.342882	0.731687	2.43317	0.0149674	2.51553	0.0118853	0.769743	0.441452	5.56575	2.61023e-08	1.80862	0.0705105	6.09761	1.07666e-09	6.28	3.38573e-10
rs3792366	3170491	PDIA5	2.17263	0.0298082	1.2105	0.226086	0.0927294	0.926119	1.1535	0.248703	1.69394	0.090276	2.23158	0.0256428	-2.25033	0.0244282	0.104169	0.917035	-0.992667	0.320872	0.67275	0.501106
rs10254547	6580711	AEBP1	-0.186858	0.851772	2.54836	0.010823	-2.11579	0.0343629	1.8447	0.0650818	1.14898	0.250563	0.982661	0.325774	-1.62889	0.103337	0.358071	0.72029	-0.852844	0.393746	-0.124809	0.900675
rs12053254	6960242	ASNSD1	0.766589	0.443326	-1.23813	0.215668	1.02222	0.306679	-0.177275	0.859293	0.589699	0.555393	0.846317	0.397376	1.05145	0.293053	0.113099	0.909952	0.873104	0.382606	0.238041	0.811849
rs1023252	3990477	C1orf167;MTHFR	1.61899	0.10545	1.73176	0.0833167	-0.0752924	0.939982	2.54759	0.0108471	2.04021	0.0413296	1.55218	0.120619	-1.78395	0.0744316	3.72468	0.00019556	-1.46993	0.141581	0.437264	0.66192
rs2575369	6110307	MRPS34	0.611757	0.540698	0.536757	0.591436	0.0655998	0.947696	0.481779	0.629963	0.439715	0.660144	1.06449	0.287107	-1.82096	0.0686126	0.840099	0.400853	-1.52821	0.126461	0.370843	0.710755
rs11856039	4060471	FAH	-1.16042	0.245878	0.144379	0.885201	2.23615	0.025342	0.393482	0.693963	0.666914	0.504827	-1.26442	0.206081	0.470918	0.637699	-1.43667	0.150812	0.686548	0.492368	0.724037	0.469043
rs12468226	6060475	BMPR2	1.2625	0.206768	0.551838	0.58106	-0.483219	0.62894	-0.21709	0.828139	1.50012	0.133583	0.918545	0.358334	-1.32429	0.185407	1.2395	0.215159	-0.622581	0.53356	0.674074	0.500264
rs4813620	1990630	TRIB3	-0.338503	0.734984	0.0579434	0.953794	-0.229877	0.818187	1.49033	0.136137	0.687784	0.491589	-0.332626	0.739416	1.4461	0.148148	1.99722	0.0458009	1.25675	0.208845	1.2094	0.226509
rs6139791	4260717	-	-0.763256	0.445311	-1.17846	0.238615	1.37679	0.168578	-1.15938	0.246302	-1.09797	0.272216	-1.18883	0.234505	0.929545	0.352607	-0.683736	0.494142	0.364594	0.715415	-0.719184	0.472028
rs1521	780600	HCP5	-0.0925566	0.926256	0.296833	0.766594	0.196998	0.843829	1.89937	0.0575162	0.182484	0.855203	-0.436239	0.662663	-1.25177	0.210653	0.0215056	0.982842	-1.18584	0.235684	-0.382151	0.702349
rs1065656	6450424	NME3	0.849082	0.395836	-0.406687	0.684238	0.389836	0.696658	-0.675313	0.499477	-0.501908	0.615732	0.295075	0.767936	-0.321098	0.748136	0.023353	0.981369	-1.56676	0.117171	-1.13228	0.257517
rs657454	1010768	NDUFB6	-0.073163	0.941676	0.456019	0.648376	0.969977	0.332058	0.820066	0.412178	0.708787	0.478457	-0.0861789	0.931324	0.742217	0.457956	0.698536	0.484842	1.45251	0.146359	1.77305	0.0762199
rs7862194	1850041	RP11-203J24.8;DPM2	0.0627891	0.949934	-0.174659	0.861348	-0.00721836	0.994241	0.128379	0.897849	-0.0241334	0.980746	0.131287	0.895549	0.44237	0.658221	1.68612	0.0917718	0.191667	0.848003	1.41065	0.158348
rs4393819	290343	TTC3	-0.843921	0.398713	-0.159711	0.873109	1.17728	0.239084	0.0947122	0.924543	-0.753944	0.450883	-0.765279	0.444105	-0.114394	0.908926	-0.492103	0.622647	-0.0170517	0.986395	0.00725906	0.994208
rs6708166	840369	LBH	1.87699	0.0605199	-2.37294	0.0176474	2.89172	0.00383136	-1.17613	0.239542	-1.00344	0.31565	2.23053	0.0257124	0.699633	0.484157	-0.112091	0.910751	-0.260503	0.794476	1.01323	0.310951
rs7120173	650678	TAGLN;PCSK7	-1.82681	0.0677282	1.62019	0.105191	-1.2841	0.199107	1.08373	0.278484	0.842777	0.399353	-0.849288	0.395721	-0.0938613	0.925219	-0.0694501	0.944631	0.153529	0.877981	-1.01268	0.311212
rs17682644	2760292	PPP1CC	-1.524	0.127509	0.259562	0.795202	-0.665199	0.505923	-0.224495	0.822372	0.992467	0.32097	0.317526	0.750845	1.26578	0.205592	-0.474123	0.635412	1.13405	0.256775	-0.134962	0.892642
rs1530947	10253	LRR1	-0.521186	0.602237	0.886848	0.375161	0.739678	0.459495	-1.22138	0.221941	1.12857	0.259079	0.550137	0.582226	0.593373	0.552931	-1.0325	0.30184	1.69468	0.0901356	0.654282	0.51293
rs9451	3170576	CTD-2324F15.2	0.00962393	0.992321	-1.40491	0.160048	2.25606	0.0240669	-0.131065	0.895724	-1.12772	0.259439	-0.657991	0.510544	-0.902718	0.366675	-1.72553	0.0844319	-1.21865	0.222978	-1.90943	0.0562072
rs3809641	5870121	SPG7	1.46331	0.143382	-0.722744	0.469837	2.07082	0.0383757	0.589659	0.555419	-0.642742	0.520392	-0.0155549	0.987589	2.02971	0.0423865	0.191938	0.84779	-0.235447	0.813862	3.44861	0.000563475
rs4713858	2630168	PPARD	1.13626	0.255847	-1.49304	0.135426	0.780817	0.43491	-1.49956	0.133729	-0.0167927	0.986602	0.747492	0.454767	0.893767	0.371447	-0.818139	0.413278	0.0770267	0.938602	0.932498	0.351079
rs7631719	2970609	CTD-2013N24.2;TMF1	0.584957	0.558576	0.64999	0.515698	-0.539522	0.589527	1.18293	0.236835	1.73821	0.0821736	1.70471	0.0882483	-0.18111	0.856281	-0.891694	0.372557	0.686769	0.492228	0.862114	0.388625
rs3104402	4900731	HLA-DMB	-0.263701	0.79201	1.38918	0.16478	-2.09928	0.0357921	0.497549	0.618802	0.779824	0.435494	0.227279	0.820207	-1.01933	0.308047	-0.205832	0.836922	-0.559405	0.575885	-1.68298	0.0923795
rs6694357	4290021	GABPB2	-0.484925	0.627729	1.0165	0.309391	-0.823283	0.410347	1.90011	0.0574181	-0.789356	0.429904	-0.690439	0.489918	-0.665436	0.505772	-1.36679	0.171692	-0.860114	0.389726	-1.15108	0.249699
rs304498	3780452	LIPA;IFIT1B	1.13788	0.255172	0.263957	0.791813	0.425473	0.670492	0.109634	0.912699	0.409919	0.681865	0.557164	0.577415	-0.367592	0.713178	0.330008	0.741394	0.0885055	0.929475	2.55271	0.0106889
rs10237118	4150687	NDUFB2	0.636421	0.524502	-0.0980982	0.921854	1.11253	0.265912	-0.154417	0.877281	0.0691208	0.944893	0.413894	0.678952	0.604611	0.545438	-0.486649	0.626507	0.822442	0.410825	0.878646	0.379593
rs2240773	3990403	MXRA7	3.08123	0.0020615	-0.372049	0.709856	0.135387	0.892306	0.80652	0.419943	-0.134049	0.893364	0.512125	0.608563	0.648843	0.51644	0.432976	0.665032	-0.453707	0.65004	1.97202	0.0486069
rs1051730	4040711	PSMA4	0.261909	0.793391	0.225177	0.821842	-0.337064	0.736069	0.982242	0.325981	1.20451	0.228391	-0.447158	0.654761	0.730942	0.464814	0.738382	0.460282	0.655862	0.511913	0.983395	0.325413
rs6425663	650241	IER5	0.507718	0.611651	0.918046	0.358595	-0.71735	0.473158	0.202444	0.83957	0.621559	0.534232	0.431591	0.666039	-0.411351	0.680815	0.618831	0.536028	0.766512	0.443372	1.47883	0.139186
rs7412746	1430278	CTSK	1.0179	0.308724	0.699167	0.484448	-2.01569	0.0438322	1.25922	0.20795	2.08595	0.0369836	1.23876	0.215433	-0.148082	0.882278	1.53581	0.124584	0.117372	0.906565	1.42547	0.154021
rs7283236	7380167	C21orf67	0.716781	0.473509	2.08547	0.0370264	-3.04322	0.0023406	0.758505	0.448149	1.8321	0.0669365	1.05946	0.28939	0.360581	0.718412	0.817686	0.413537	1.25814	0.20834	0.593721	0.552698
rs2070615	2680446	ARF3;AC073610.5	-0.232984	0.815774	0.227715	0.819868	0.394872	0.692937	-0.328804	0.742304	-0.315322	0.752517	0.488602	0.625124	0.663646	0.506917	-1.04311	0.2969	-0.0234609	0.981283	0.372029	0.709871
rs705094	1340022	PMVK	0.762352	0.44585	0.614537	0.538861	0.043756	0.965099	0.71452	0.474906	0.21272	0.831546	0.854601	0.392772	0.0571022	0.954464	1.02597	0.304908	0.0629822	0.949781	1.45685	0.145159
rs11831480	1070692	DDX51	-2.06605	0.038824	1.33785	0.180947	0.43395	0.664325	0.823995	0.409942	-0.234999	0.81421	-1.19964	0.23028	-0.958976	0.337571	-0.408062	0.683228	-0.53355	0.593653	-0.467875	0.639874
rs2857151	2650156	TAP2	2.46913	0.0135442	-0.555486	0.578563	0.0716024	0.942918	0.824614	0.40959	0.0795222	0.936617	0.767431	0.442825	1.98513	0.0471303	4.16317	3.13857e-05	1.25139	0.210791	3.25756	0.00112374
rs2244012	7050180	SLC22A5	-2.45054	0.0142643	1.27221	0.2033	-0.755306	0.450066	0.217209	0.828046	1.25579	0.209191	-0.38304	0.70169	1.82944	0.0673336	-0.26838	0.788407	2.64559	0.00815476	-0.463295	0.643153
rs12047808	6200386	SOAT1	0.191809	0.847892	1.3392	0.180505	1.30339	0.192443	0.276237	0.782366	2.00911	0.0445259	1.00561	0.314601	0.303325	0.761642	1.48599	0.137282	0.612386	0.540282	1.24696	0.212411
rs10792942	6770377	TMEM135	0.533542	0.593658	0.198824	0.8424	-0.479908	0.631293	0.61499	0.538561	0.482045	0.629774	0.38085	0.703315	-0.0399276	0.968151	-0.59204	0.553824	0.945849	0.344226	0.476227	0.633912
rs3859192	6380411	IKZF3	0.178216	0.858553	0.383966	0.701004	0.197781	0.843216	1.0825	0.27903	0.391643	0.695322	-0.440309	0.659713	-0.686759	0.492235	-0.868893	0.384906	-0.027863	0.977771	-0.481687	0.630029
rs454100	7320520	MTUS1	-1.23253	0.217751	2.24493	0.0247726	-1.94634	0.0516138	3.22825	0.00124549	1.34274	0.179356	-0.57554	0.564926	2.75718	0.0058303	1.81599	0.0693714	2.70869	0.00675501	3.58133	0.000341854
rs4557020	3710201	SPTBN1	0.833078	0.404801	-1.52814	0.126477	0.806772	0.419798	-0.522267	0.601485	-1.35898	0.174152	-0.316742	0.751439	1.26412	0.206187	-0.140154	0.888539	-0.112817	0.910175	0.540908	0.588571
rs7867580	6520215	ANXA1	0.766463	0.443401	-0.705363	0.480584	-0.286963	0.774141	0.53593	0.592007	-0.0149274	0.98809	-0.462767	0.643531	1.31136	0.189737	0.754771	0.450386	0.533701	0.593548	1.53023	0.12596
rs7138953	5560128	PRR4;TAS2R10	0.325446	0.744843	1.37551	0.168972	-0.282177	0.777807	2.17624	0.0295376	2.23119	0.0256688	1.30903	0.190524	2.19447	0.0282015	1.9996	0.0455435	2.59366	0.00949606	3.0069	0.00263929
rs735765	3390053	ZKSCAN4	0.345401	0.729793	1.20764	0.227184	0.442742	0.657952	1.67607	0.0937237	1.71035	0.0872005	0.587517	0.556857	-0.207966	0.835256	1.23633	0.216336	0.625611	0.53157	2.6199	0.00879559
rs42100	2480136	HIBADH	0.777998	0.43657	-1.88738	0.0591089	1.17657	0.239369	-0.956679	0.338729	-1.57691	0.114817	-1.09801	0.2722	1.01943	0.307998	-0.0383179	0.969434	-0.297407	0.766156	-0.287356	0.77384
rs2523946	4060255	ZNRD1	-1.56878	0.116698	0.298006	0.765699	0.251675	0.801292	0.332466	0.739538	0.283878	0.776504	-0.311727	0.755248	0.489629	0.624396	-0.65608	0.511773	0.715342	0.474398	-0.473198	0.636072
rs6773261	150692	SLC26A6	0.252403	0.800729	-0.510172	0.609931	0.842212	0.39967	-0.726918	0.467276	2.24799	0.0245769	0.97086	0.331618	-0.0944994	0.924712	-0.425088	0.670772	1.60271	0.108998	1.29689	0.194669
rs4713956	940463	PNPLA1	0.844464	0.39841	-1.24431	0.213384	0.44504	0.656291	0.206482	0.836415	0.816069	0.41446	-0.174242	0.861675	1.82305	0.0682955	-0.189764	0.849494	2.22194	0.0262872	0.784817	0.432561
rs1110110	460292	CSRP2BP	-0.135762	0.89201	-0.0940244	0.92509	1.22083	0.222151	-0.756725	0.449215	0.453199	0.650405	0.220342	0.825604	1.05853	0.289813	-0.246328	0.805429	-0.229003	0.818867	-0.0220673	0.982394
rs1668158	3840554	SPOCK2	0.109509	0.912799	0.713139	0.47576	1.41155	0.158082	-0.585545	0.558181	-1.66099	0.0967151	-1.09781	0.272287	-1.18916	0.234377	-0.84855	0.396132	-1.54279	0.122882	-1.23938	0.215205
rs9891119	5090619	STAT3	0.317985	0.750497	3.1003	0.00193324	-1.25956	0.207828	1.4437	0.148824	1.39244	0.16379	0.906347	0.364752	-1.6202	0.105188	-0.773919	0.438979	0.253059	0.800223	-1.22918	0.219003
rs12114373	4210280	CPQ	0.1828	0.854955	-0.372804	0.709294	1.21843	0.223062	-0.879499	0.379131	-1.18437	0.236267	-0.184531	0.853597	0.849155	0.395795	-0.181203	0.856208	-0.253484	0.799894	1.13616	0.25589
rs9378249	160132	ATP6V1G2-DDX39B;DDX39B	-0.0230469	0.981613	0.172989	0.86266	-0.539485	0.589552	-0.200565	0.841039	0.998432	0.31807	-0.47463	0.635051	-1.5079	0.131581	0.06684	0.946709	0.17315	0.862533	0.307403	0.758537
rs10875290	6590475	CDC14A	1.43232	0.152051	2.19988	0.0278155	-1.70332	0.0885074	0.329681	0.741641	2.48178	0.0130729	3.06838	0.00215223	-2.78613	0.00533415	0.609592	0.542132	-0.332483	0.739525	1.0224	0.30659
rs16887244	2360360	DDHD2;WHSC1L1	0.605502	0.544846	-0.0524456	0.958174	-0.0126112	0.989938	0.320763	0.74839	0.0349273	0.972138	-0.111458	0.911253	-0.257927	0.796463	-0.849398	0.39566	0.0953964	0.924	0.547889	0.583768
rs6429082	160376	B3GALNT2	-0.564721	0.572264	0.427831	0.668774	-1.35519	0.175356	0.445943	0.655638	0.253862	0.799602	-0.889134	0.373931	-0.749128	0.45378	0.217828	0.827563	-0.562242	0.573951	-0.837294	0.402427
rs1698231	380148	DECR2	-1.31128	0.189762	-0.499237	0.617612	-0.0987111	0.921368	0.441627	0.658759	-2.04838	0.0405224	-2.27495	0.022909	-0.137416	0.890702	-0.422131	0.672929	-1.52375	0.127571	-1.78271	0.0746337
rs9548569	6510598	NHLRC3	0.988949	0.322688	0.0296904	0.976314	-0.0147671	0.988218	0.613988	0.539224	0.729482	0.465707	0.804367	0.421185	-0.485038	0.627649	-0.885842	0.375702	0.191417	0.848199	0.606409	0.544243
rs2910397	2230278	CABP5	2.00949	0.0444853	1.14399	0.252628	0.220636	0.825376	1.40546	0.159886	0.257116	0.797089	1.6329	0.102491	-1.25399	0.209847	0.855367	0.392348	-0.76486	0.444355	1.80603	0.0709144
rs7130098	6420592	FXYD6-FXYD2;FXYD2	-0.170945	0.864267	0.468237	0.639615	-0.305211	0.760205	0.782248	0.434069	0.180153	0.857033	-0.159878	0.872977	-0.502306	0.615452	-0.873814	0.382219	0.326973	0.743688	0.290949	0.771091
rs2523822	2070088	HLA-G	0.329798	0.741553	-3.34497	0.000822915	1.46275	0.143534	-1.03959	0.298531	0.90954	0.363065	0.635366	0.52519	7.95906	1.73345e-15	-0.15352	0.877989	7.4248	1.12954e-13	6.25182	4.05687e-10
rs1750802	6520594	ARHGEF11	0.288175	0.773213	1.07583	0.282001	-0.46637	0.64095	-0.371717	0.710103	2.55215	0.0107062	0.928454	0.353172	-0.21745	0.827858	1.60889	0.107639	0.491247	0.623252	2.28215	0.0224808
rs1760670	7330546	MED8	2.2667	0.0234083	0.142544	0.88665	0.071096	0.943321	0.484681	0.627902	0.881668	0.377956	2.22604	0.0260112	3.52508	0.000423354	2.33476	0.0195561	3.36737	0.000758898	2.90077	0.00372249
rs2346177	5090731	CRIPT	0.420721	0.673959	-0.0805291	0.935816	1.18184	0.237267	0.895208	0.370676	-0.779269	0.435821	-0.518914	0.603821	-0.00266999	0.99787	-0.166514	0.867752	-0.317216	0.751079	-0.54171	0.588018
rs1046089	780600	HCP5	-0.934747	0.349919	-1.08281	0.278895	0.489335	0.624605	0.402128	0.68759	-1.35692	0.174807	-2.1362	0.0326632	0.59499	0.55185	-0.999514	0.317546	-0.244866	0.80656	-0.507426	0.611856
rs3766	2490066	CD2BP2	1.14276	0.253139	-0.181948	0.855624	0.678606	0.497387	-0.739501	0.459603	0.592951	0.553214	1.38053	0.167423	-0.213381	0.83103	1.52793	0.126529	0.187376	0.851366	2.11985	0.0340183
rs3132935	270168	HLA-DRA	1.17213	0.241146	-1.59521	0.110665	0.223952	0.822795	-1.49761	0.134235	-0.781415	0.434559	0.764206	0.444745	0.0655891	0.947705	-0.699331	0.484345	-0.946437	0.343926	-0.936017	0.349265
rs2051549	6450692	PSMB9	1.97559	0.0482016	-0.901239	0.367461	0.47916	0.631825	0.988458	0.322928	-0.456991	0.647678	0.631052	0.528007	-0.254105	0.799414	1.6063	0.108207	-1.33282	0.182589	0.7356	0.461974
rs17360053	1780564	CDC42	-0.5689	0.569424	-0.589404	0.55559	0.0100346	0.991994	-0.781849	0.434303	0.0182563	0.985434	-0.807914	0.41914	-0.0917492	0.926897	-0.0240888	0.980782	-0.670376	0.502618	-0.518386	0.604189
rs11648796	2970475	MSLN;HAGHL;NARFL	-1.51779	0.129066	0.631465	0.527737	-1.38476	0.166124	0.389504	0.696903	0.943519	0.345415	-1.15631	0.247555	-0.314261	0.753323	-0.439479	0.660315	-0.0364041	0.97096	-0.805539	0.420509
rs938641	1500328	FUT10	-2.23063	0.0257057	1.49622	0.134596	0.00799852	0.993618	1.96048	0.0499393	0.539814	0.589325	-1.84023	0.065735	-0.665708	0.505598	-1.17218	0.241127	0.303208	0.761731	-1.32725	0.184425
rs7607369	780465	SLC11A1	-0.58376	0.559382	1.92353	0.0544135	-0.756022	0.449636	0.353415	0.723777	1.1194	0.262971	0.393058	0.694276	0.694073	0.487637	1.25272	0.210308	0.269075	0.787872	0.573063	0.566602
rs12023776	2690224	ISG20L2	-0.504822	0.613684	0.996174	0.319166	0.571656	0.567555	-0.632536	0.527037	1.63511	0.102026	0.719455	0.47186	0.370787	0.710796	1.71408	0.0865137	0.884346	0.37651	-0.299099	0.764865
rs2521770	580403	DFNA5	1.4181	0.156162	-0.986496	0.32389	0.982854	0.32568	-0.555768	0.57837	-0.813182	0.416114	-2.61182	0.00900605	-0.480641	0.630772	-1.62489	0.104186	-0.281348	0.778444	-1.62277	0.104639
rs12078935	1340360	RP1-20B21.4;RCC2	0.353947	0.723379	0.383646	0.70124	-0.32774	0.743108	0.55175	0.581119	0.910778	0.362412	0.549509	0.582656	-1.06632	0.286279	-1.059	0.289601	0.194498	0.845786	-0.432634	0.665281
rs11976480	2940424	-	-2.48219	0.0130577	2.52172	0.0116782	-1.32482	0.185231	2.34362	0.0190976	2.59994	0.00932391	-1.19476	0.232179	1.81464	0.0695794	-1.73445	0.0828381	3.29356	0.000989264	1.14081	0.253951
rs174548	380224	FADS2	-0.204325	0.8381	1.29148	0.196538	-1.27984	0.200603	1.31366	0.18896	0.853802	0.393215	-0.259355	0.795362	-0.410779	0.681234	0.919527	0.35782	0.00343242	0.997261	-0.0277078	0.977895
[truncated: 11,135 more rows]

## Sheet: Sheet1
NeutrophilProxy	118	13037
Axis-1	107	13037
Axis-2	75	13037
Axis-3	66	13037
Axis-4	161	13037
Axis-5	150	13037
Axis-6	207	13037
Axis-7	43	13037
Axis-8	224	13037
Axis-9	264	13037
